# Supplementary material for: Scandium-catalyzed tandem selective oxirane ring-opening/Friedel–Crafts alkylation: a facile access to [1,4]oxazino[4,3-a]indoles and 3,4-dihydro-1H-pyrrolo[2,1-c][1,4]oxazines
Source: Royal Society of Chemistry journal article supplement (doi:10.1039/c4ob01057d), 2014-07-08

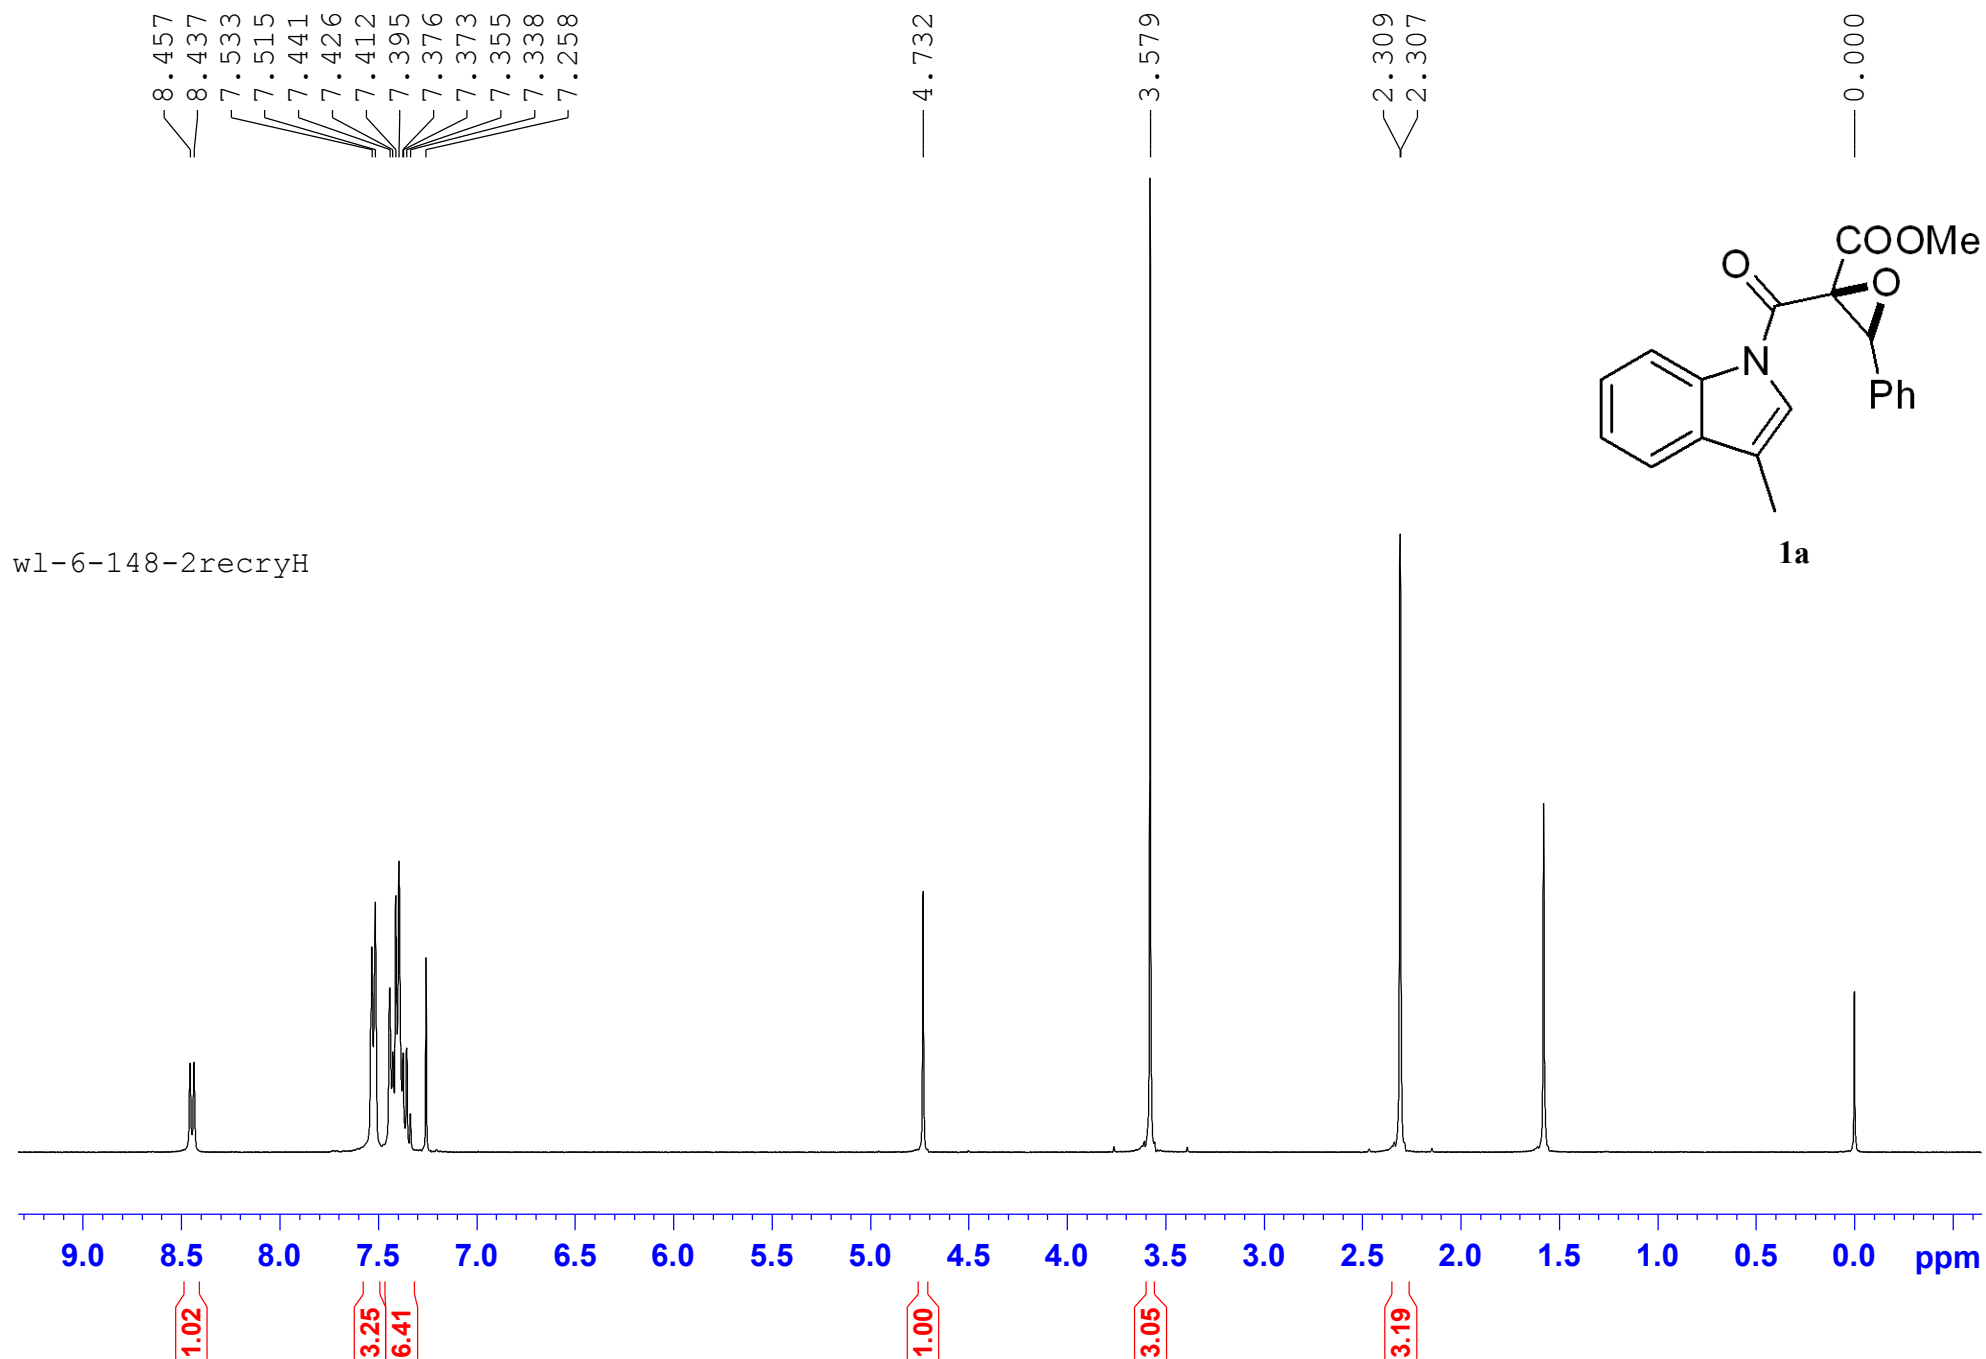

wl-6-148-2recryC

164.30  
161.49

135.77  
131.73  
131.13  
129.16  
128.29  
126.70  
125.62  
124.55  
121.07  
120.56  
119.03  
116.60

77.31  
77.00  
76.68

65.94  
63.43

53.27

9.75

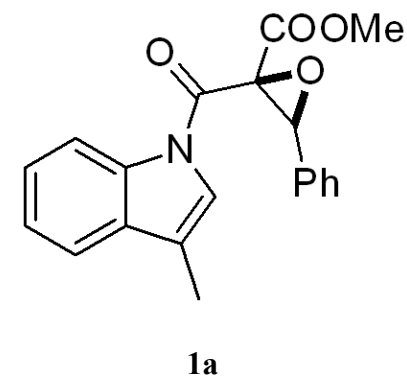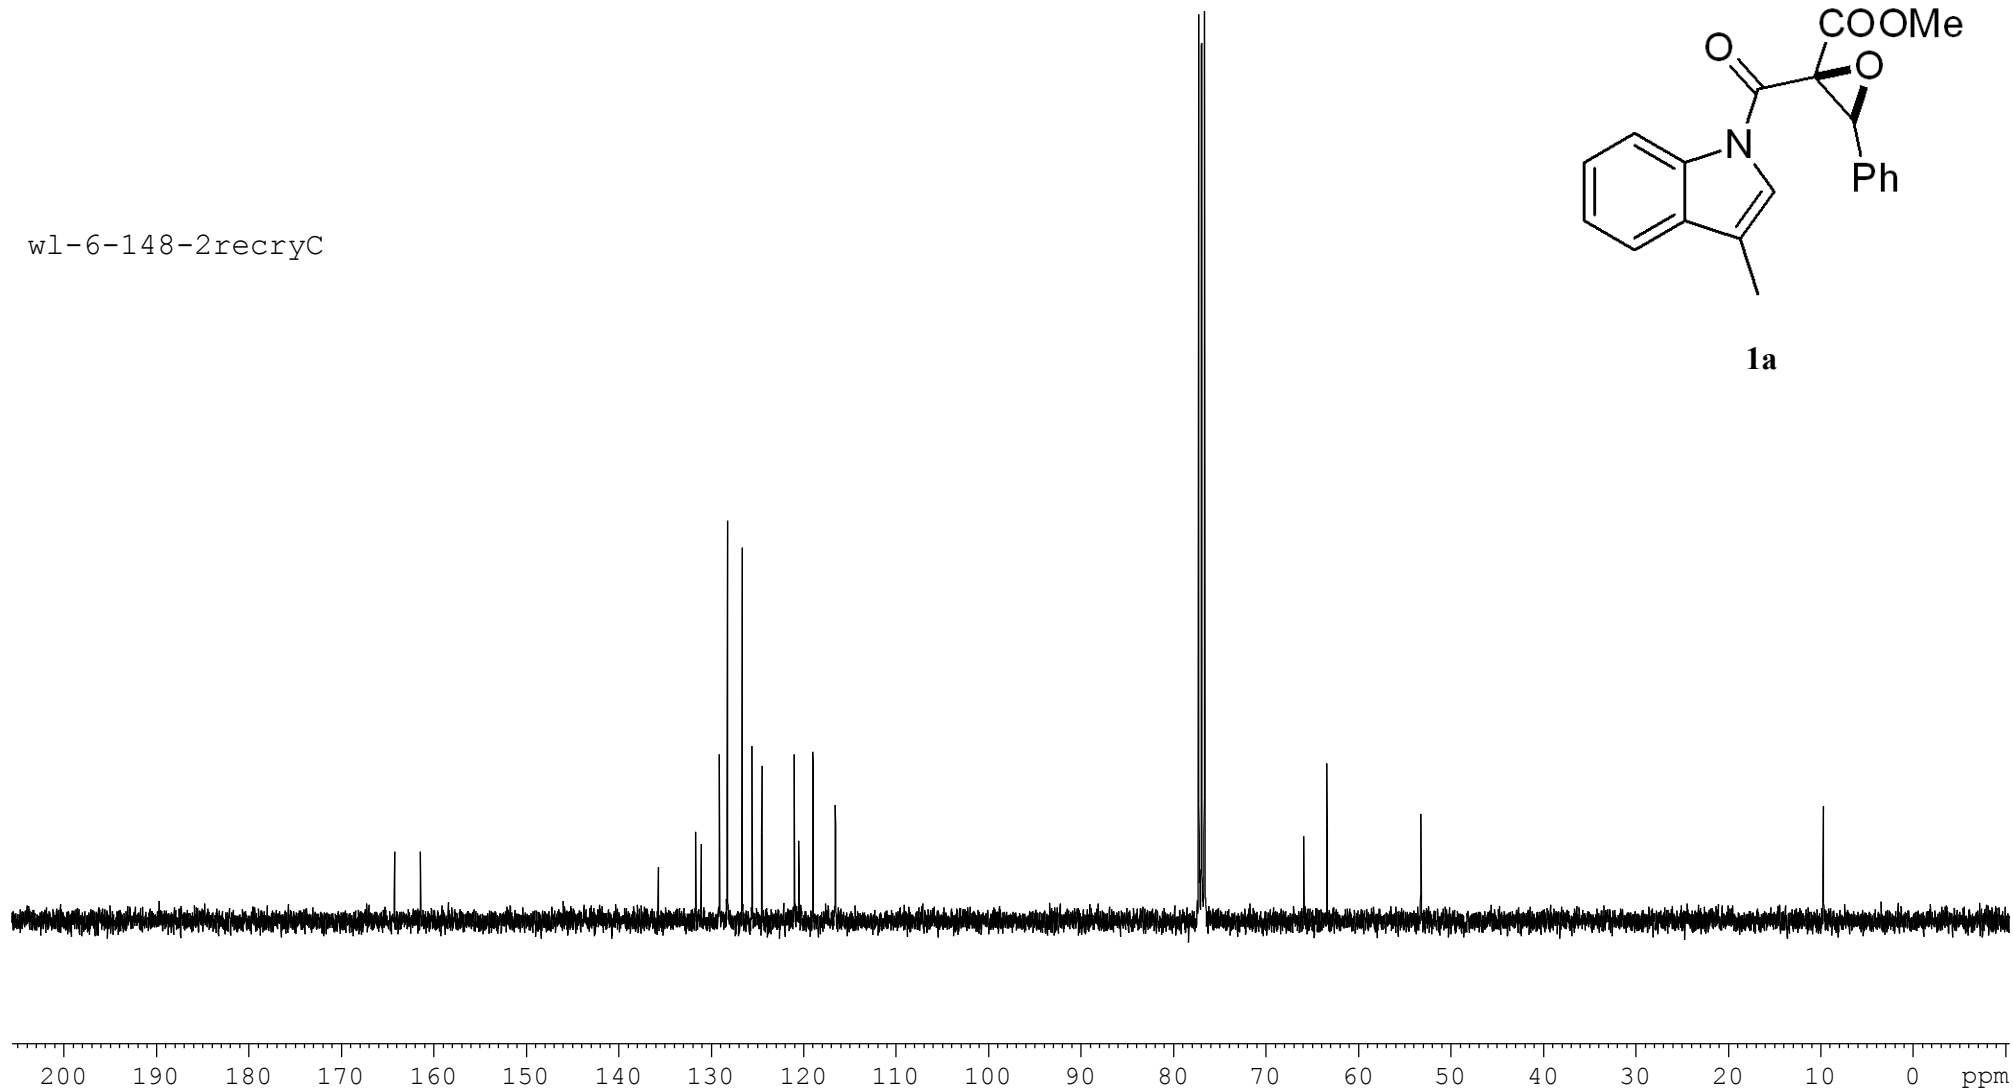

8.463  
7.696  
7.686  
7.598  
7.579  
7.538  
7.533  
7.519  
7.515  
7.434  
7.425  
7.411  
7.402  
7.396  
7.394  
7.355  
7.353  
7.336  
7.317  
7.249  
6.736  
6.726

— 4.741

— 3.571

— 0.000

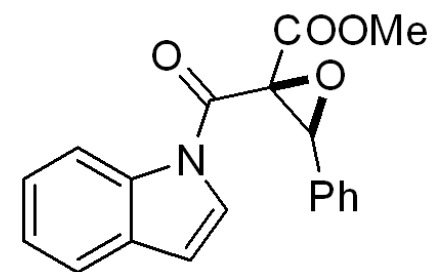

w1-7-31-1preH

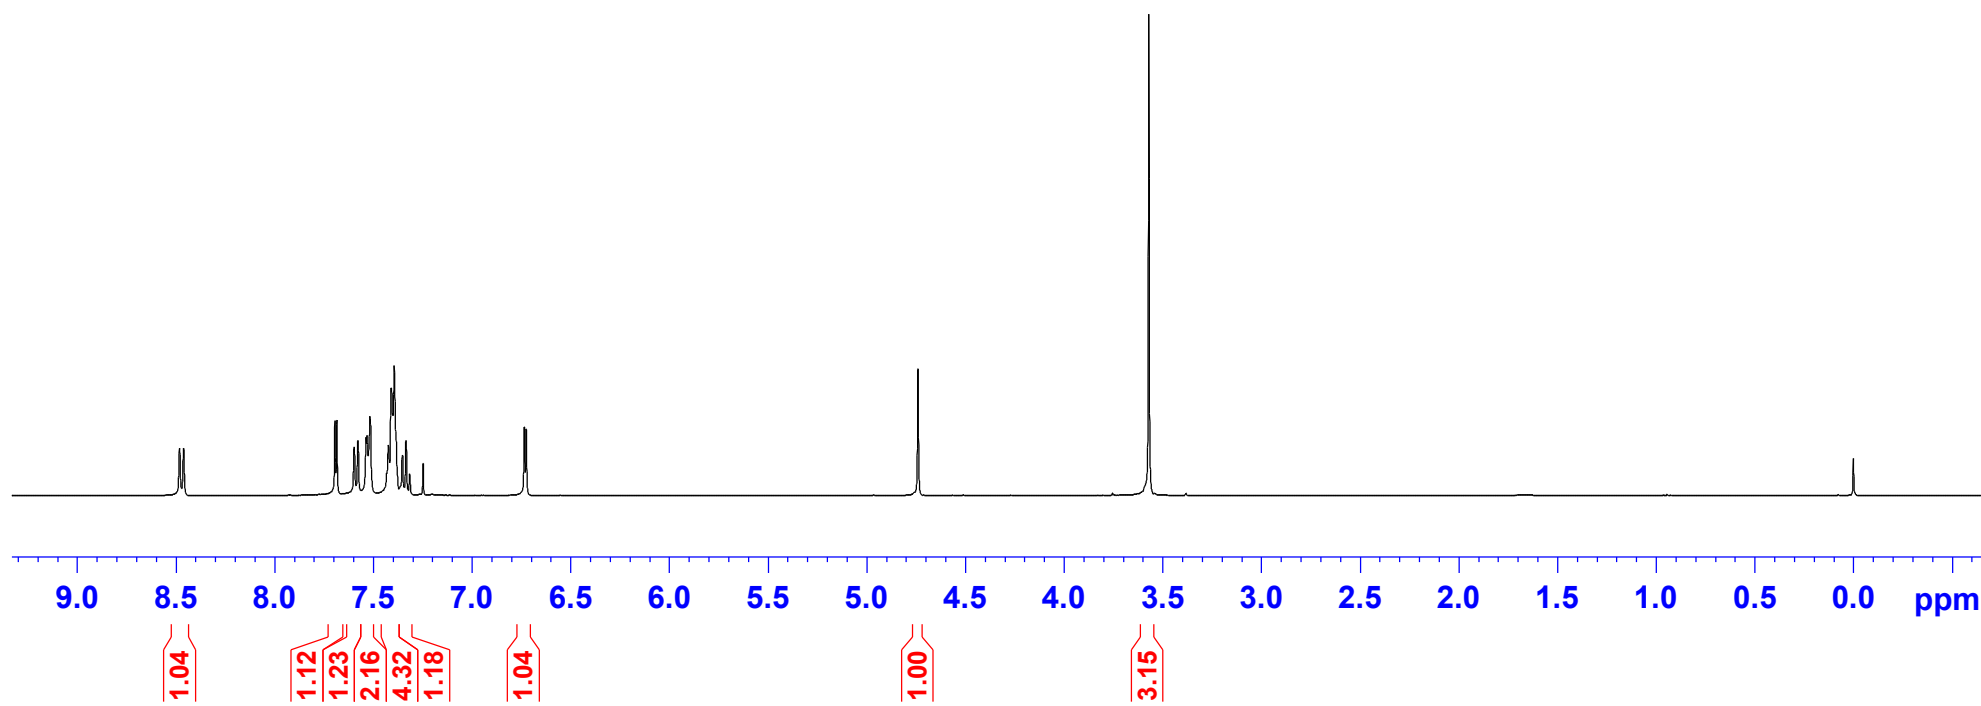

164.13  
161.99

135.45  
130.96  
130.53  
129.21  
128.30  
126.69  
125.58  
124.77  
124.56  
121.05  
116.55  
111.09

77.32  
77.00  
76.68

65.84  
63.39

53.30

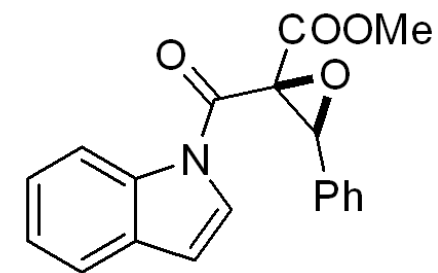

1b

w1-7-31-1preC

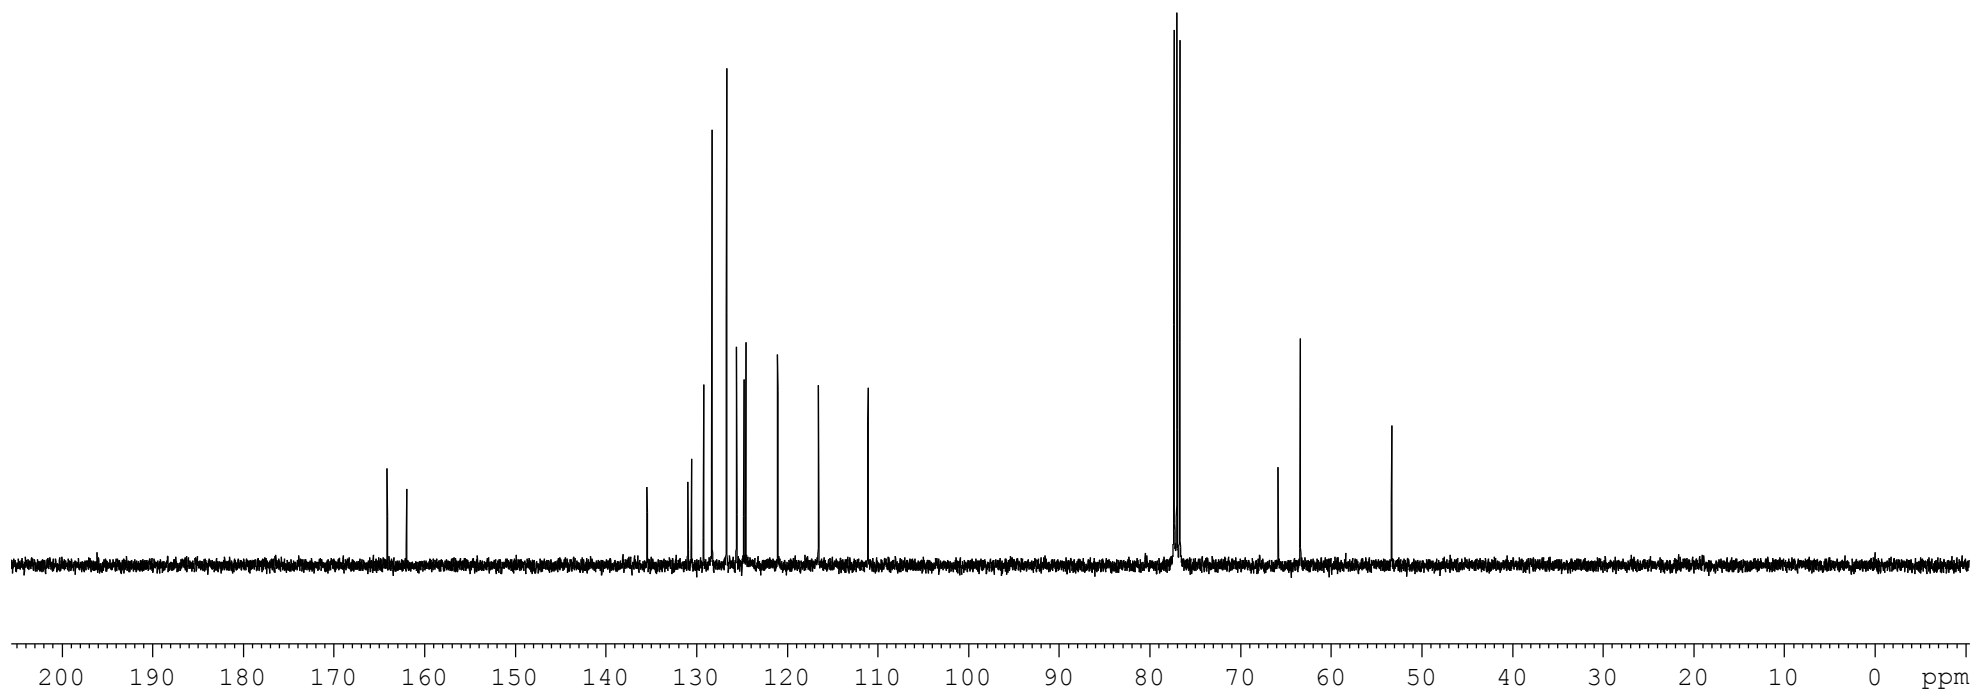

8.341  
8.320  
7.657  
7.647  
7.538  
7.533  
7.518  
7.436  
7.427  
7.422  
7.414  
7.398  
7.378  
7.260  
7.233  
7.212  
6.665  
6.656

— 4.736

— 3.572

— 2.465

— 0.005

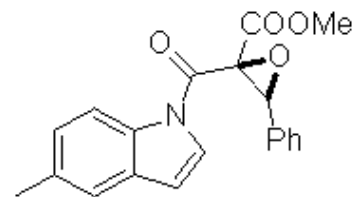

**1c**

w1-7-67-pH

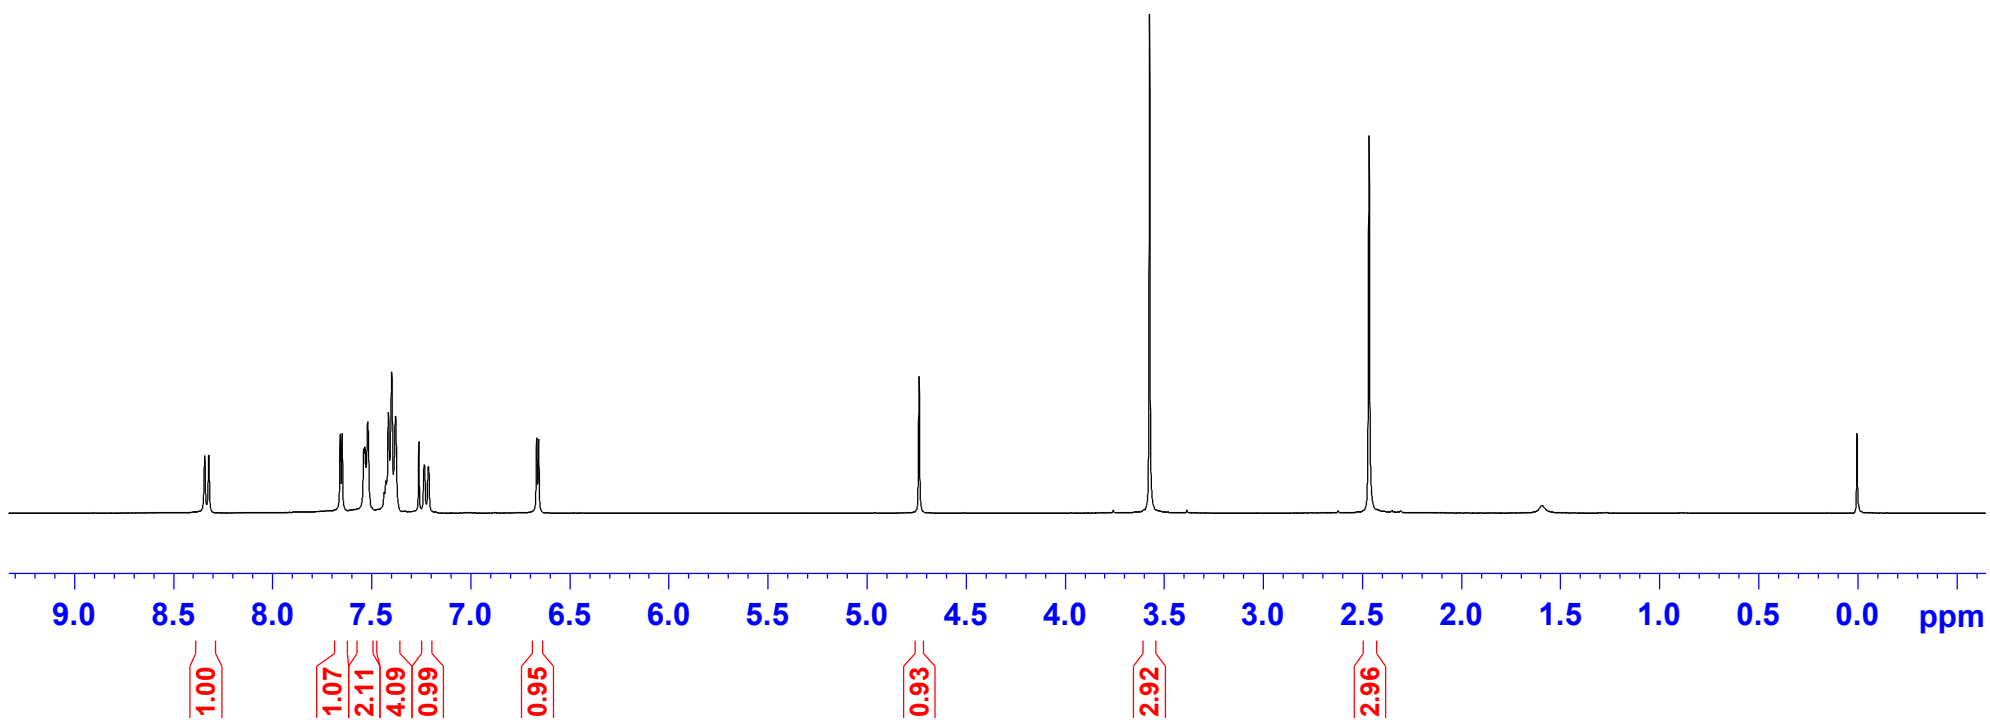

w1-7-67-pC

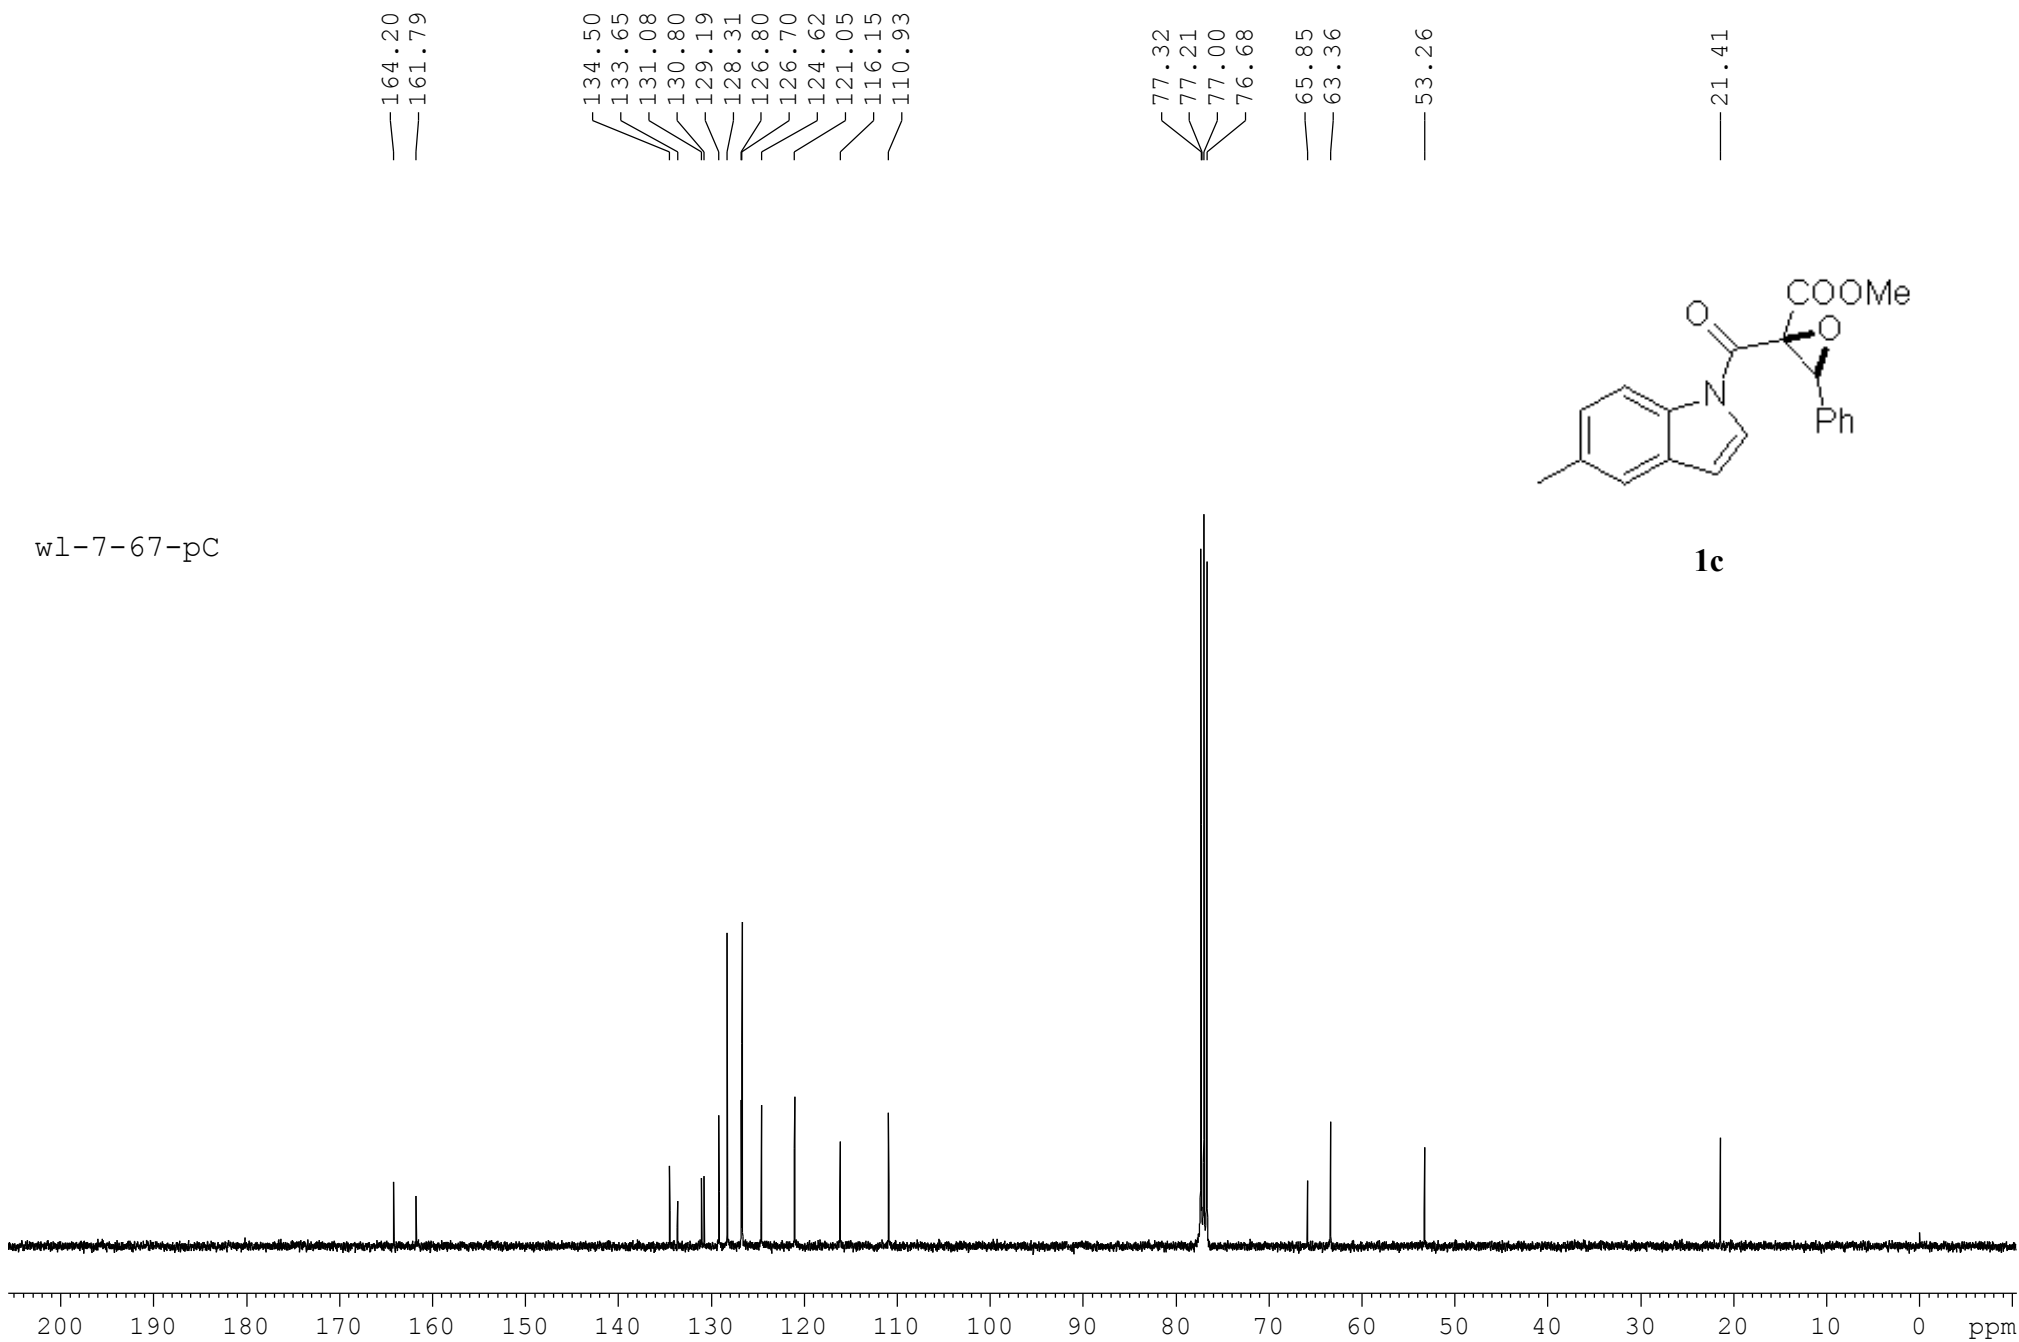

8.363  
8.341  
7.670  
7.660  
7.531  
7.526  
7.511  
7.508  
7.423  
7.418  
7.410  
7.394  
7.392  
7.054  
7.048  
7.008  
7.002  
6.986  
6.980  
6.667  
6.657

— 4.727

— 3.868

— 3.574

— 0.000

w1-7-39-1H

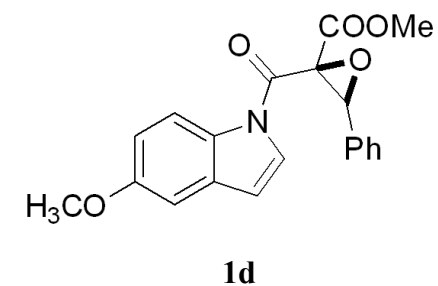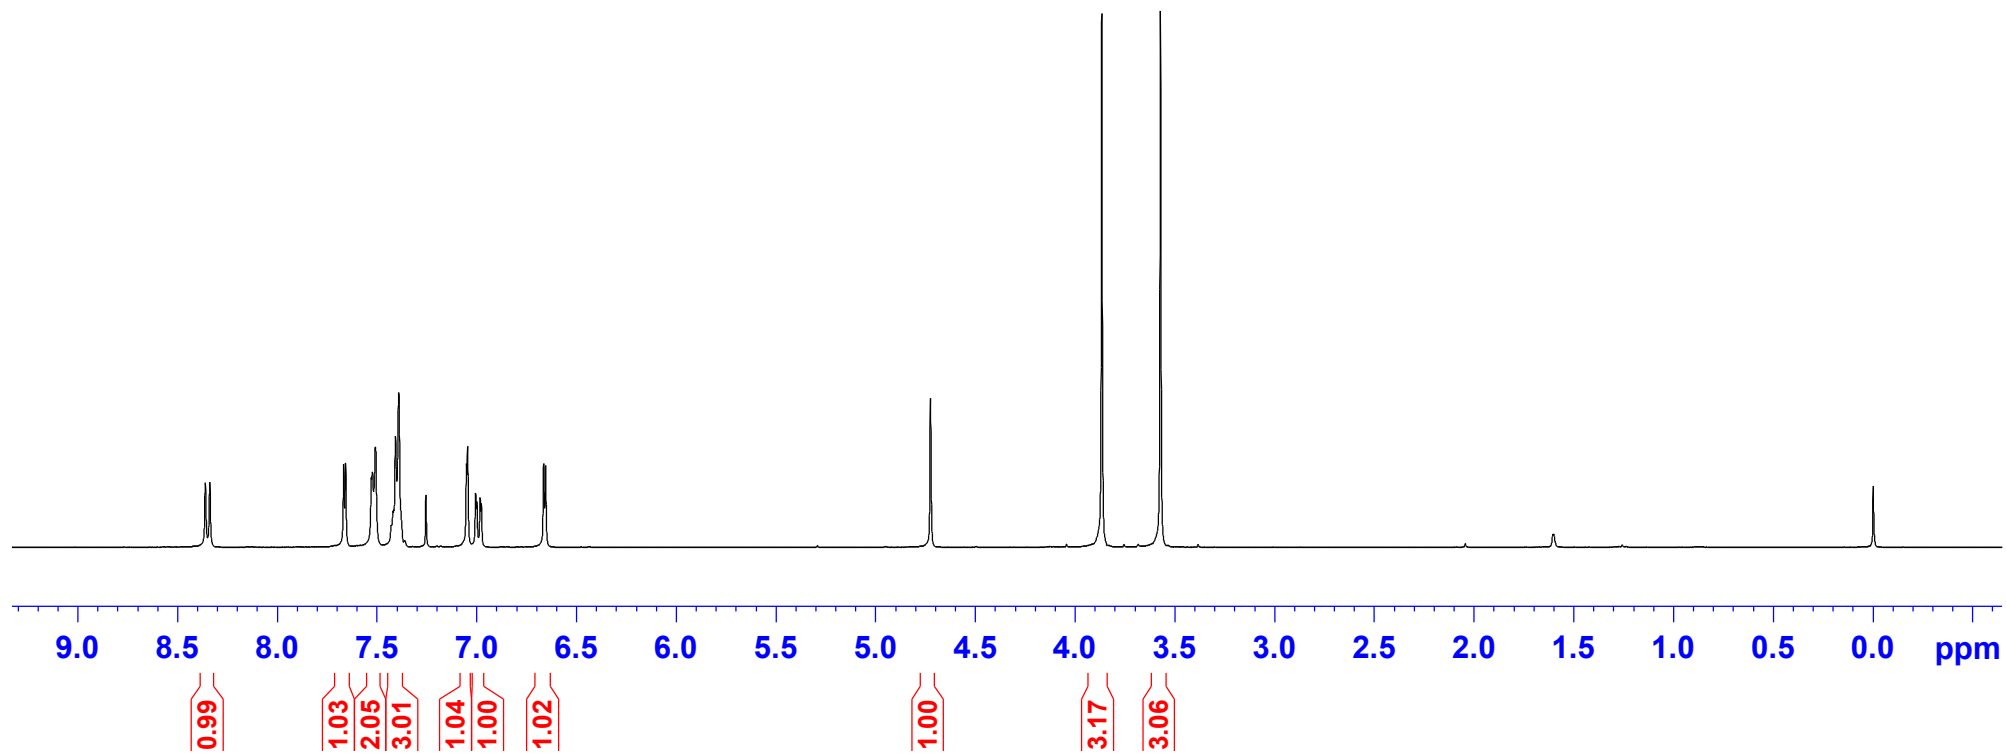

w1-7-39-1C

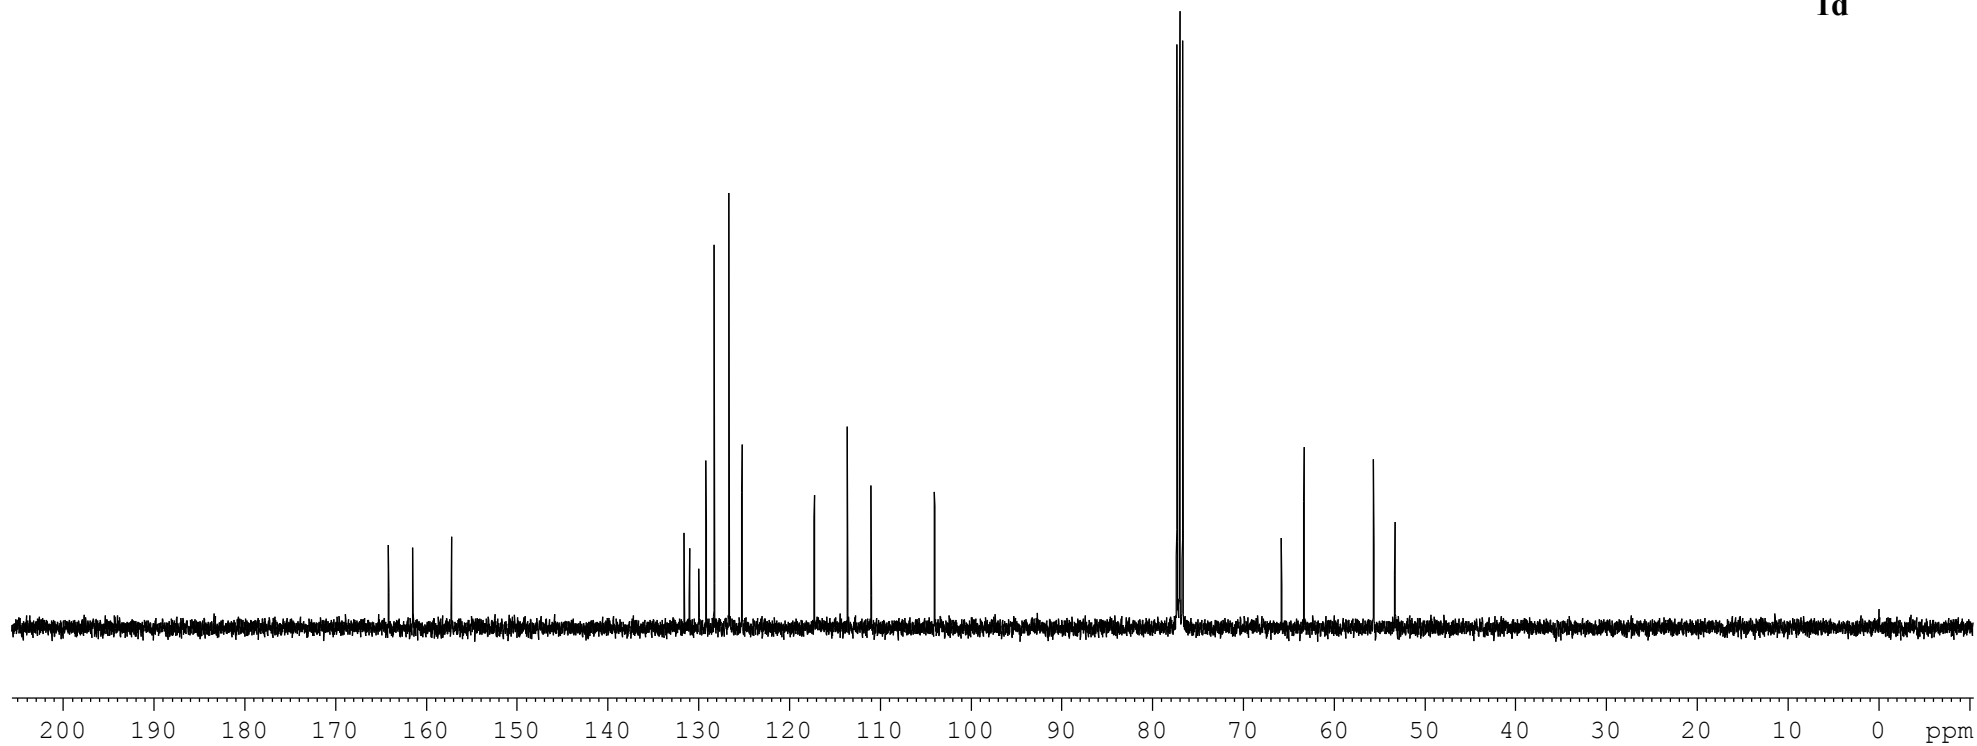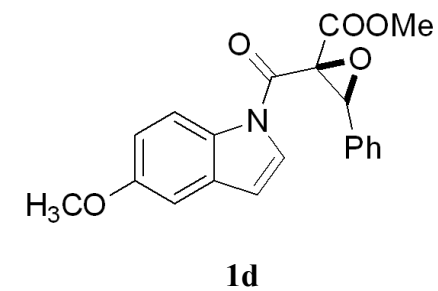



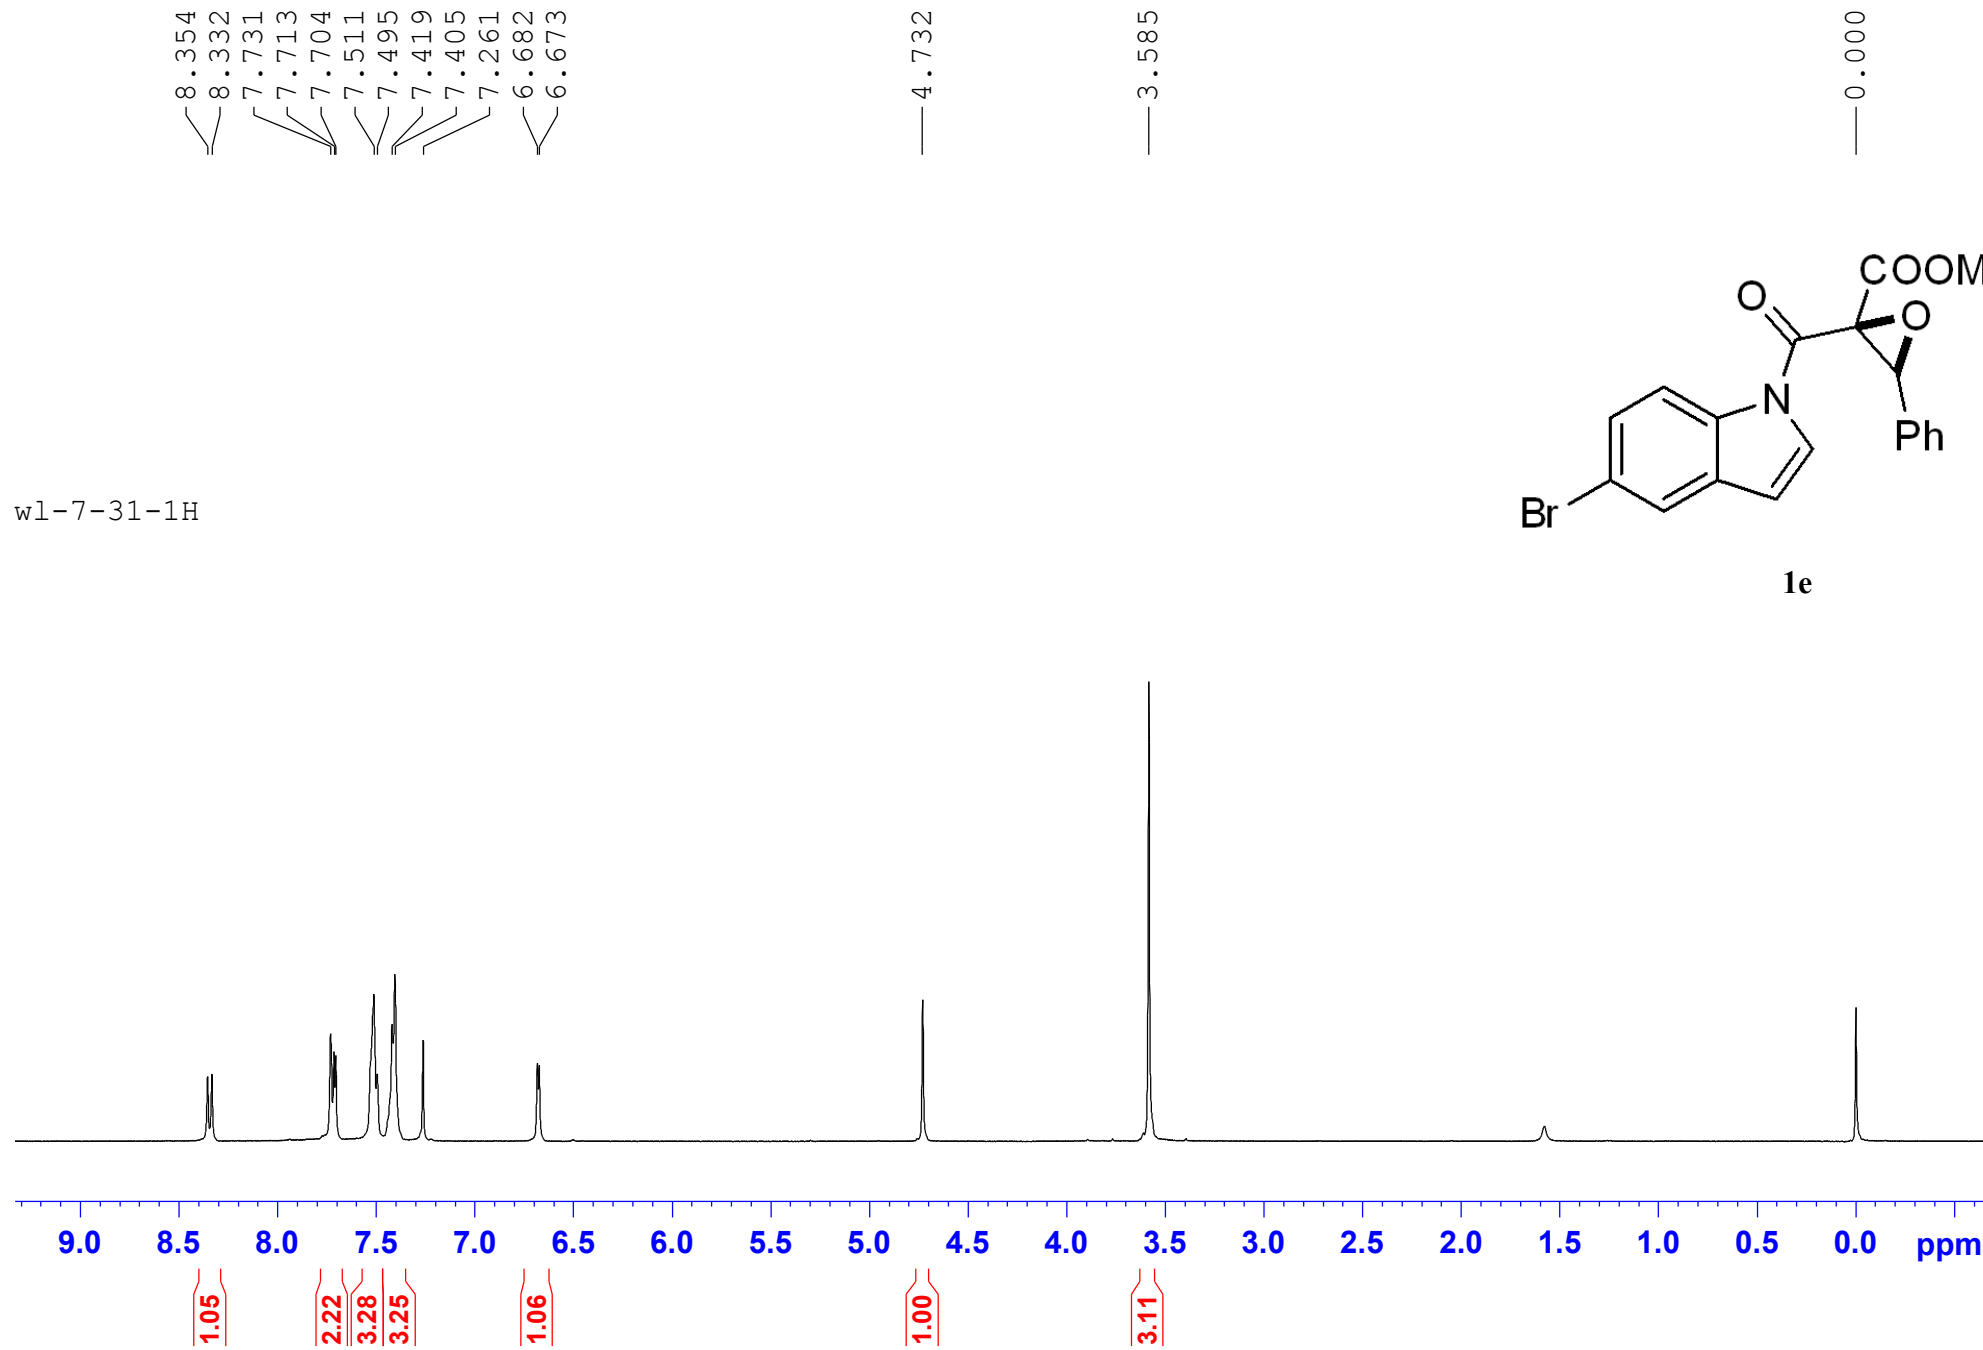

w1-7-31-1C

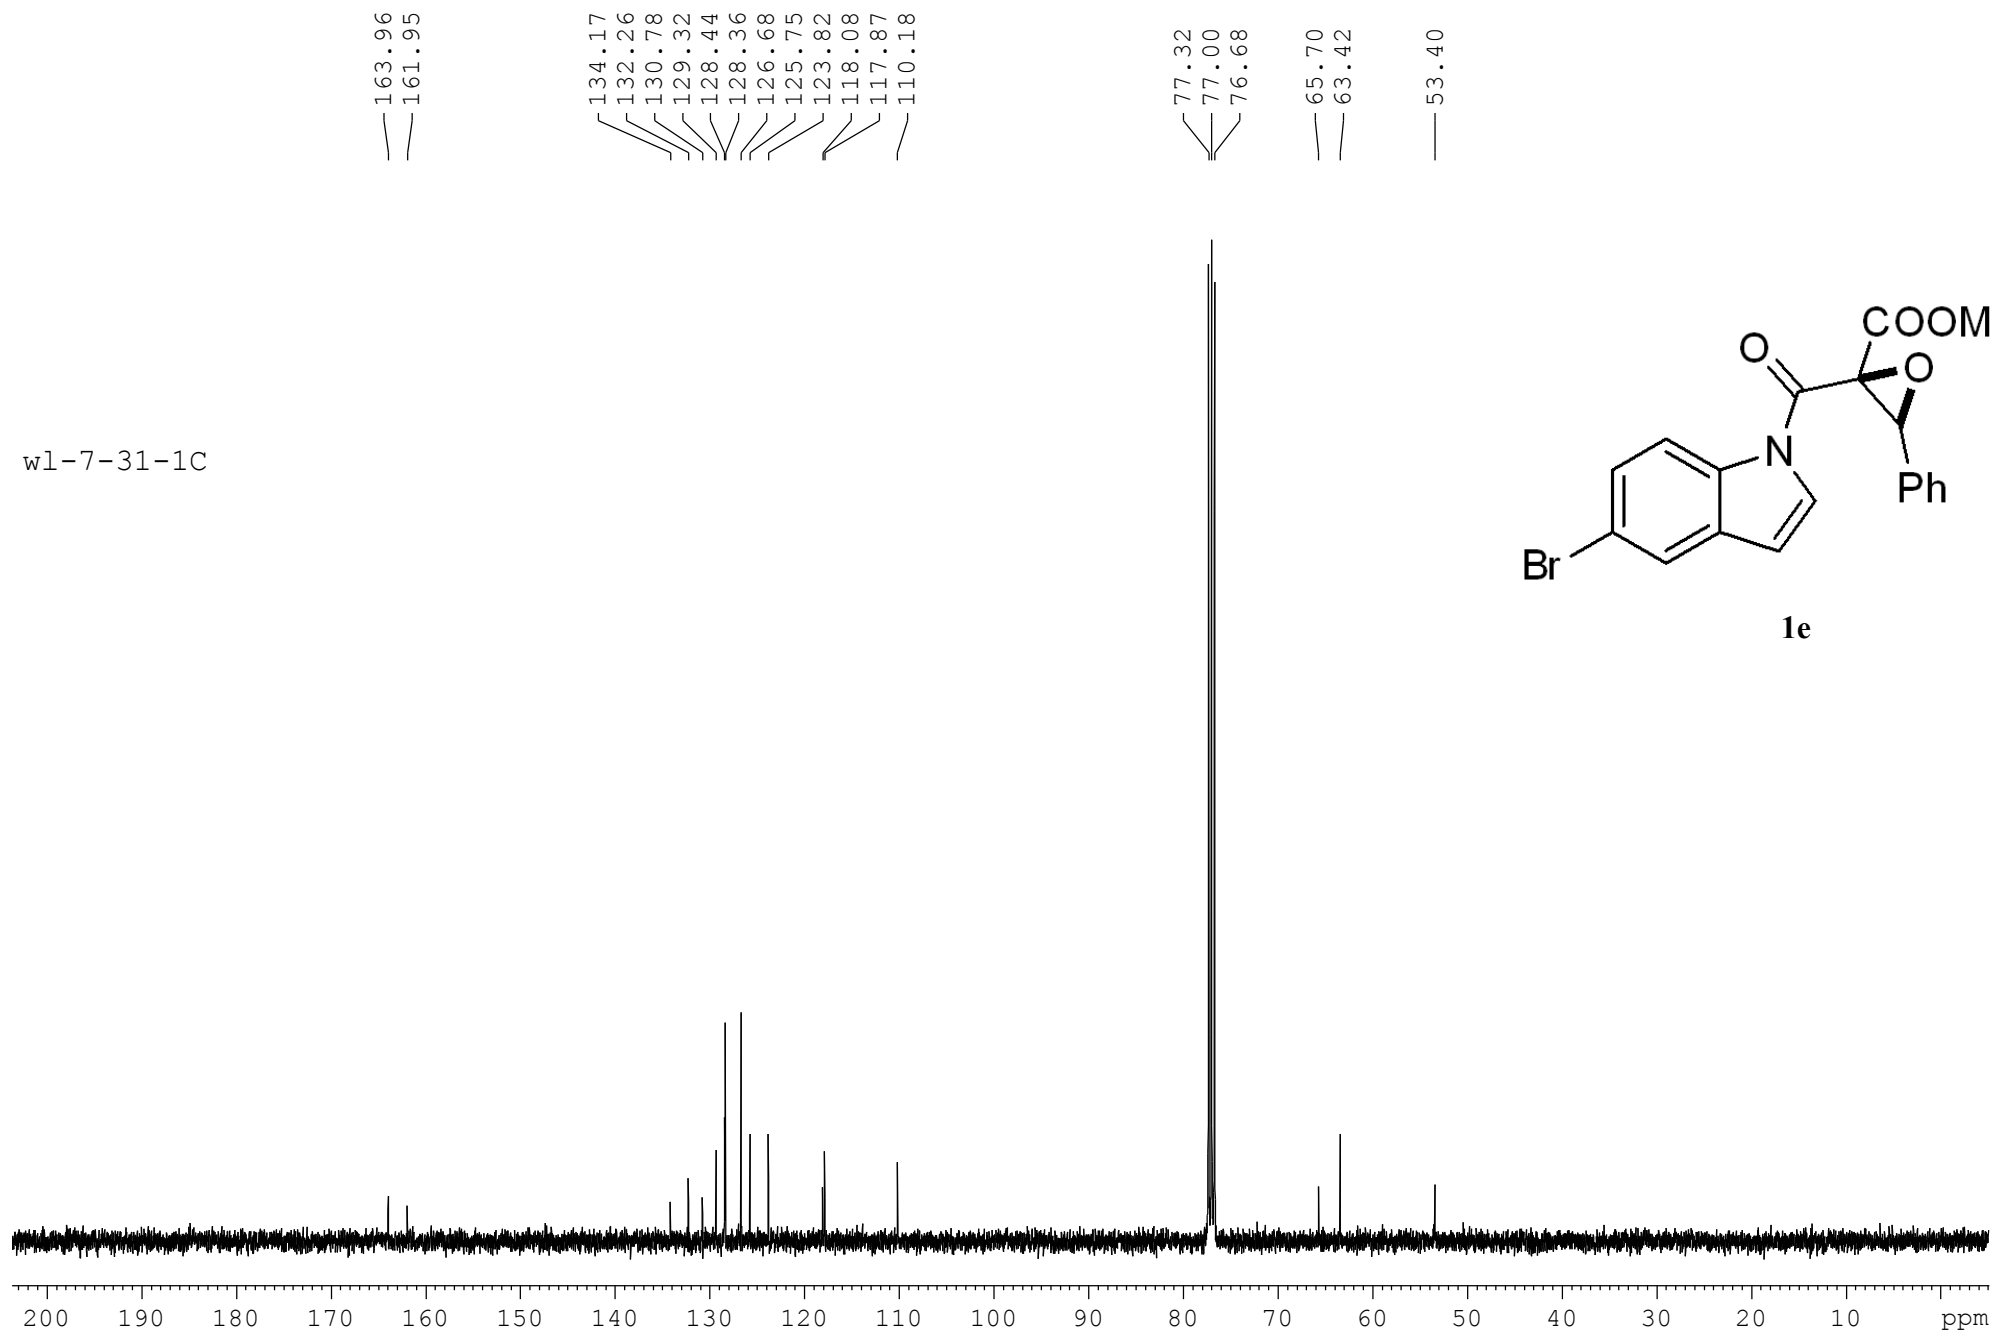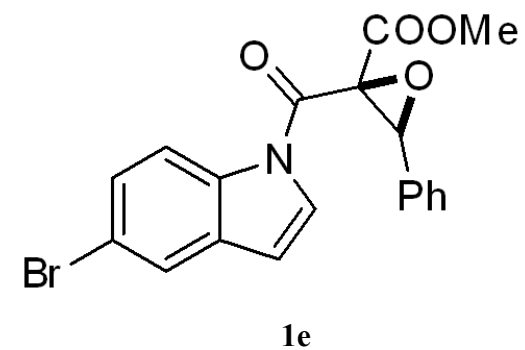

8.219  
8.212  
8.202  
8.197  
7.554  
7.548  
7.535  
7.477  
7.473  
7.468  
7.461  
7.453  
7.446  
7.433  
7.419  
7.415  
7.262

— 4.739

— 3.970

— 3.604

— 0.000

w1-7-132-1H

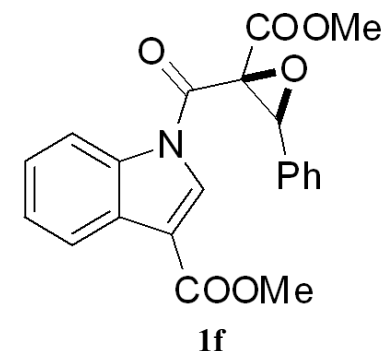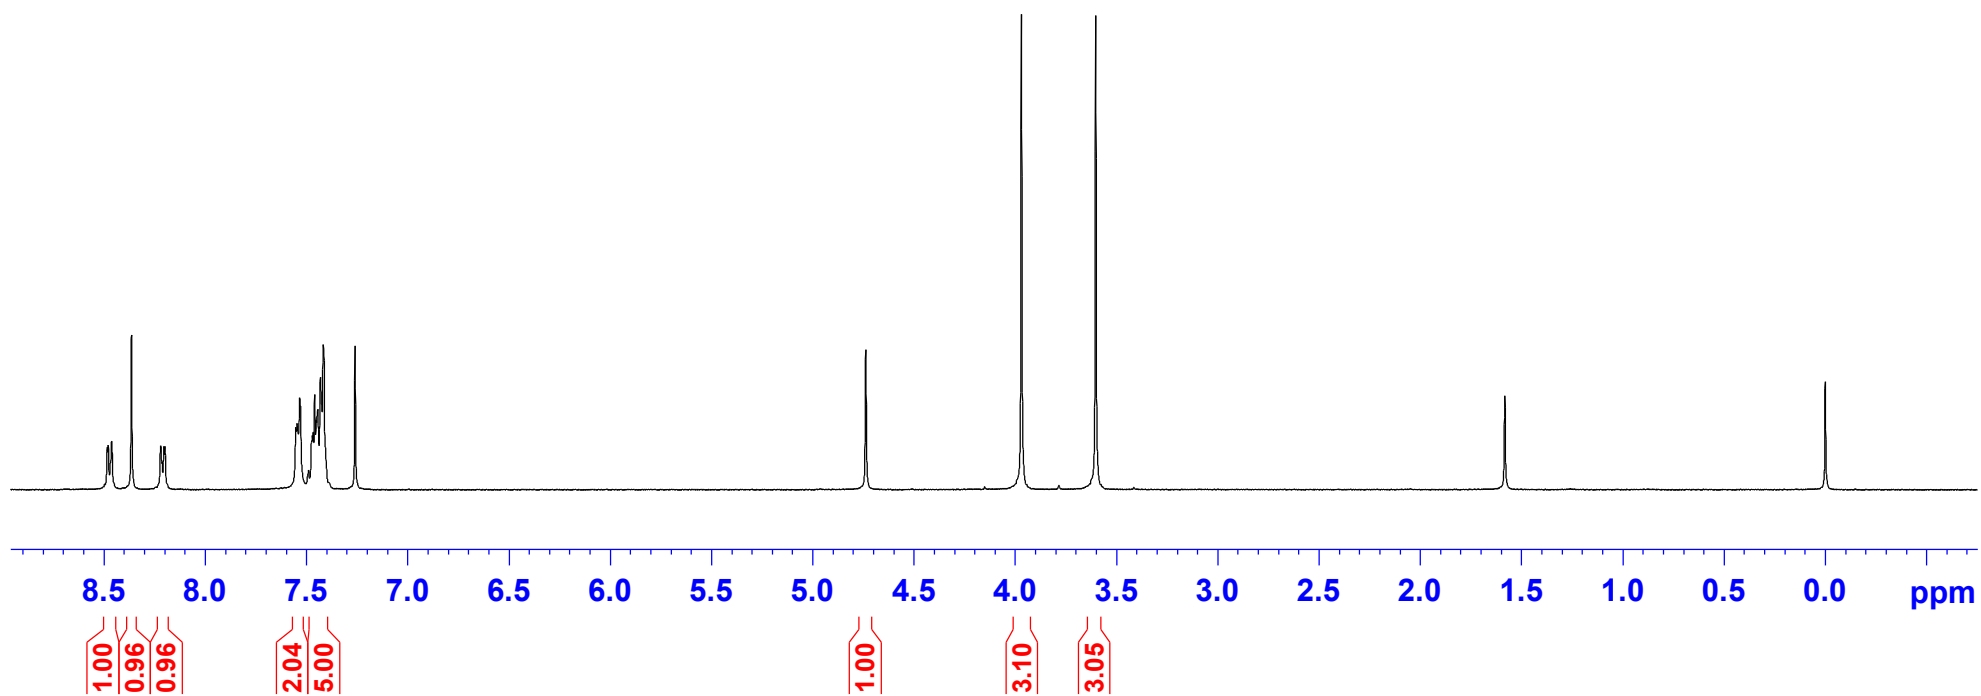

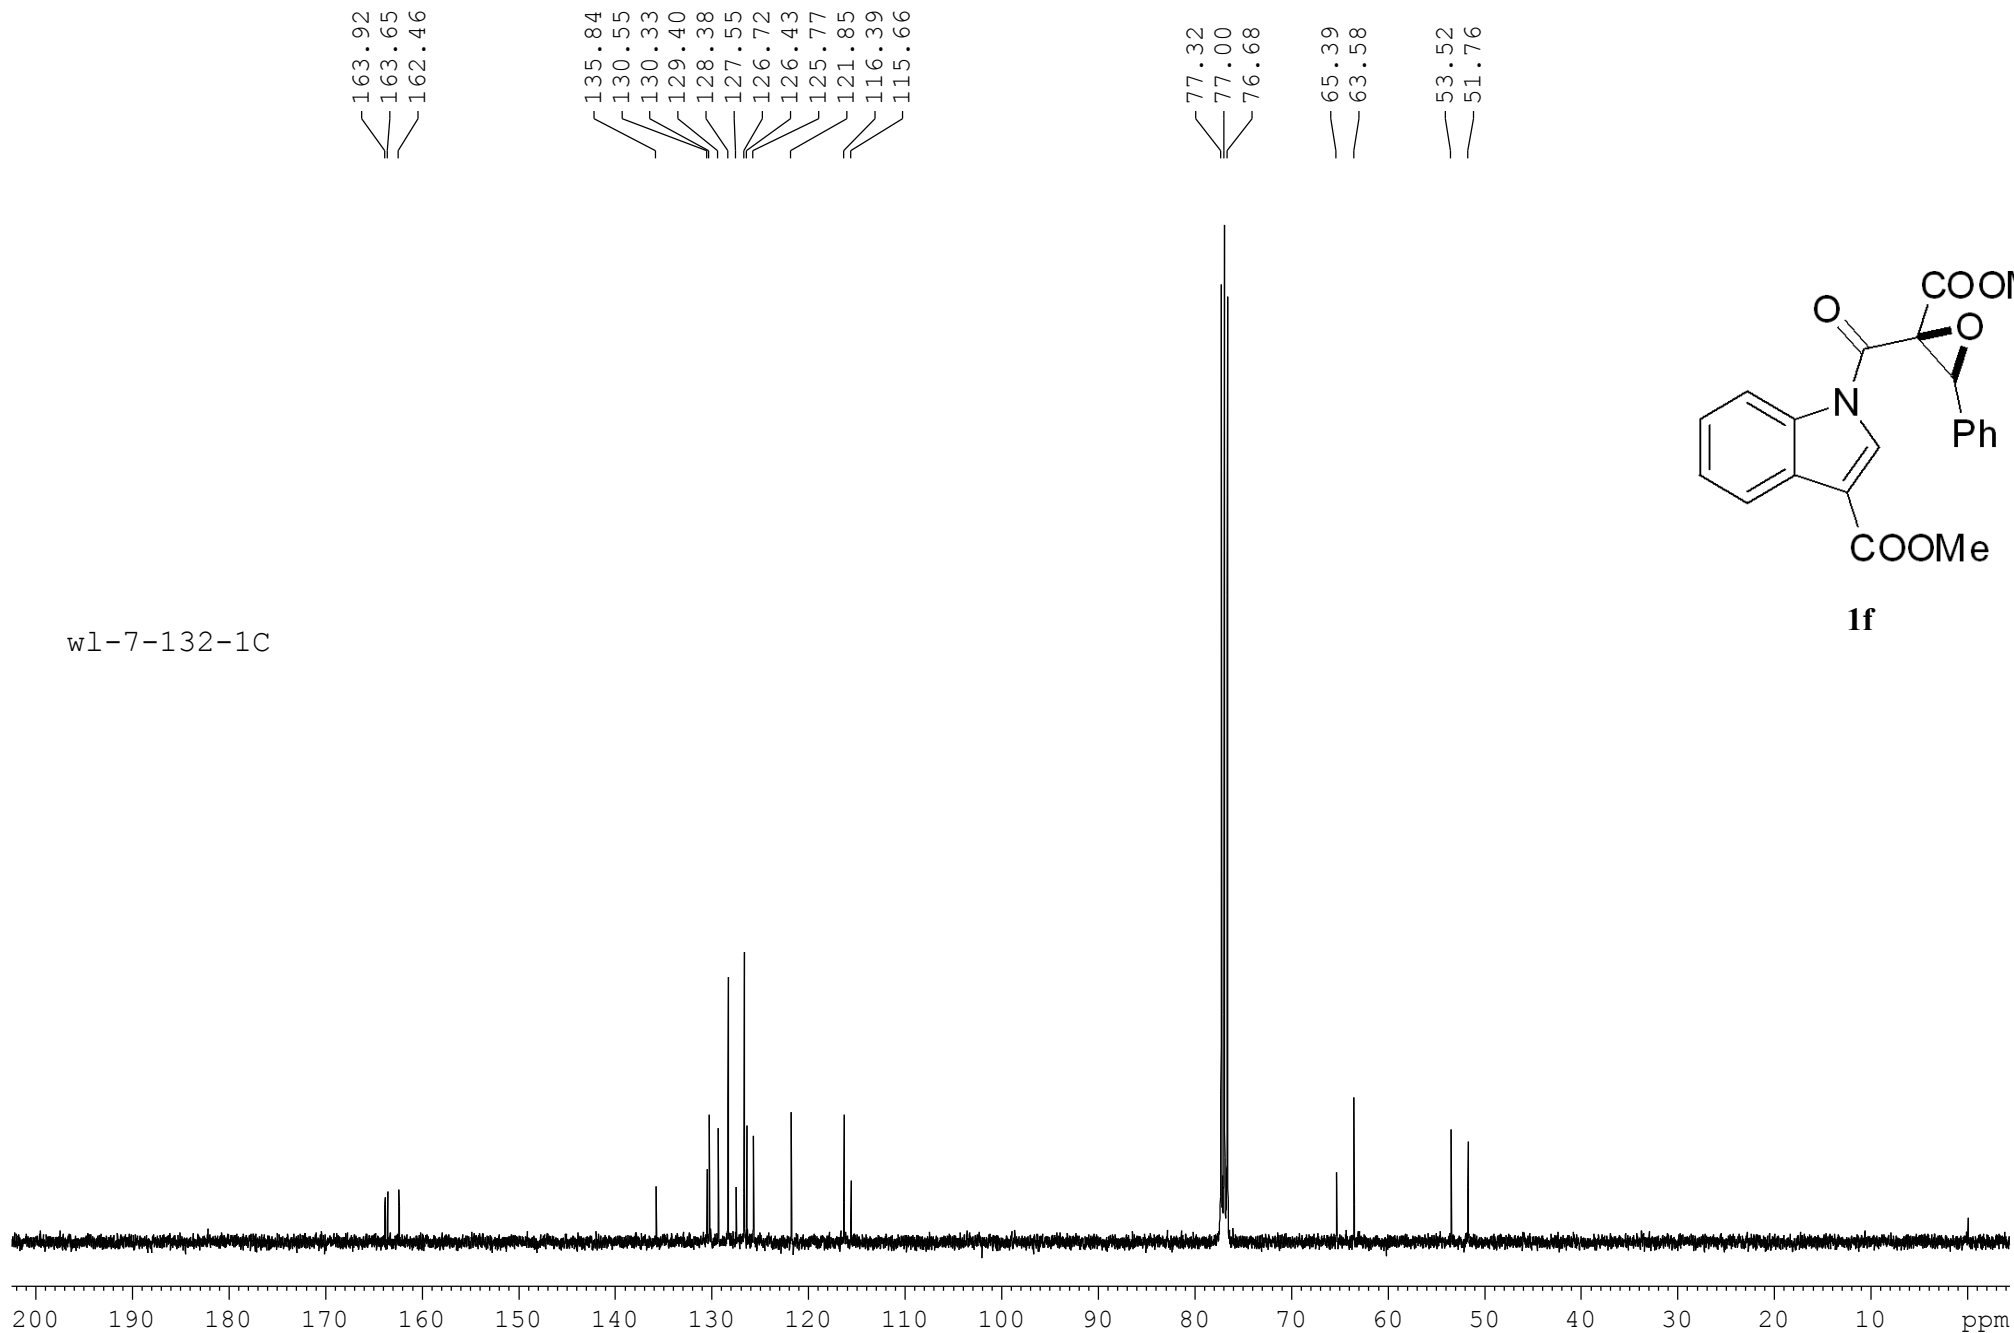

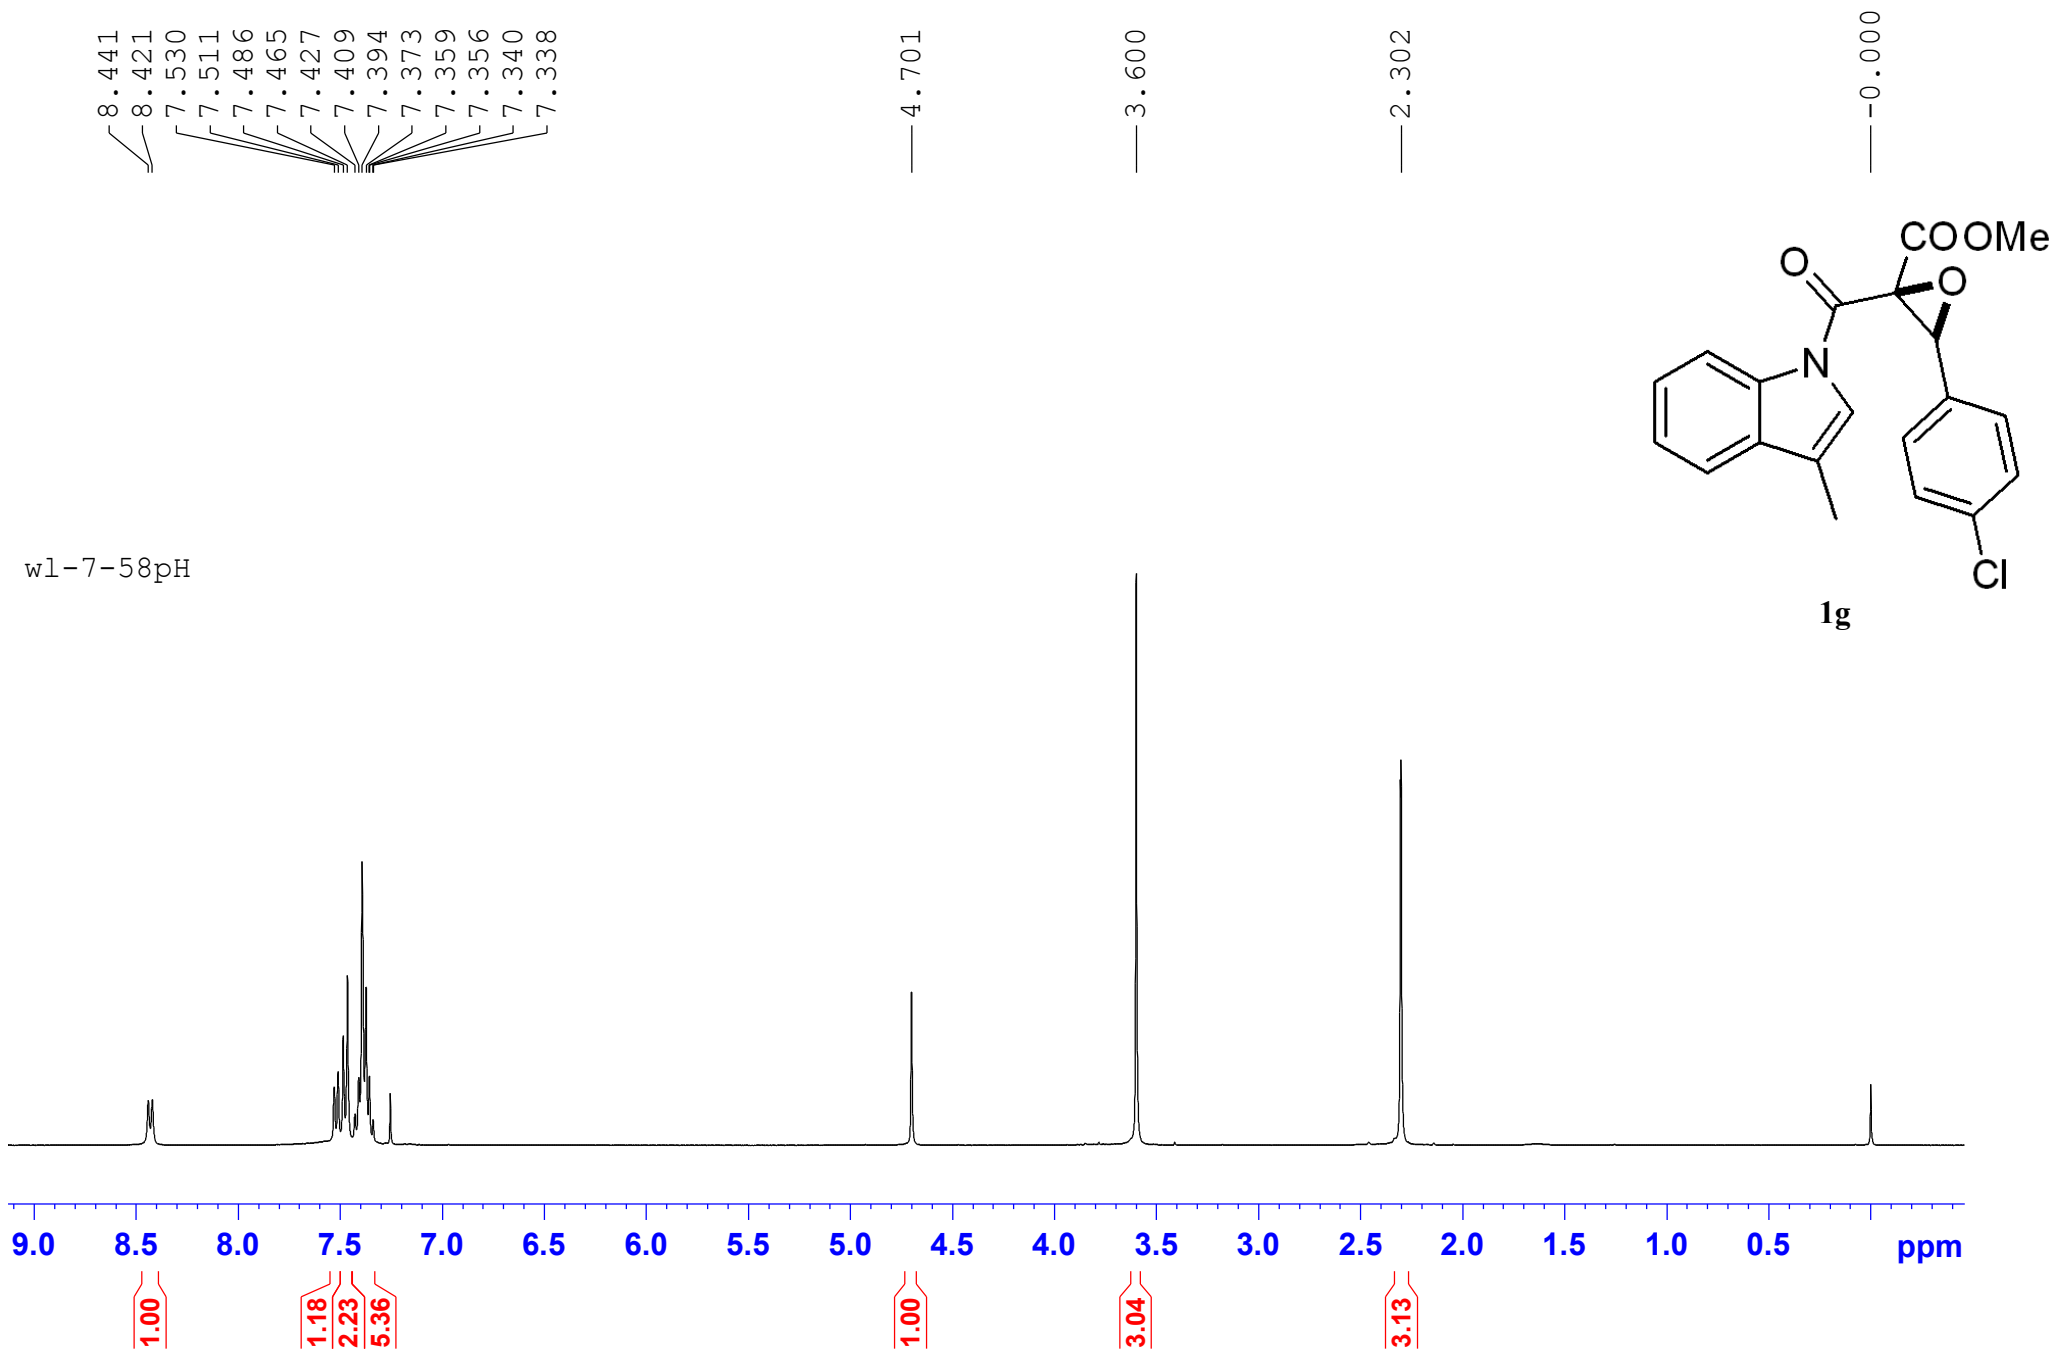

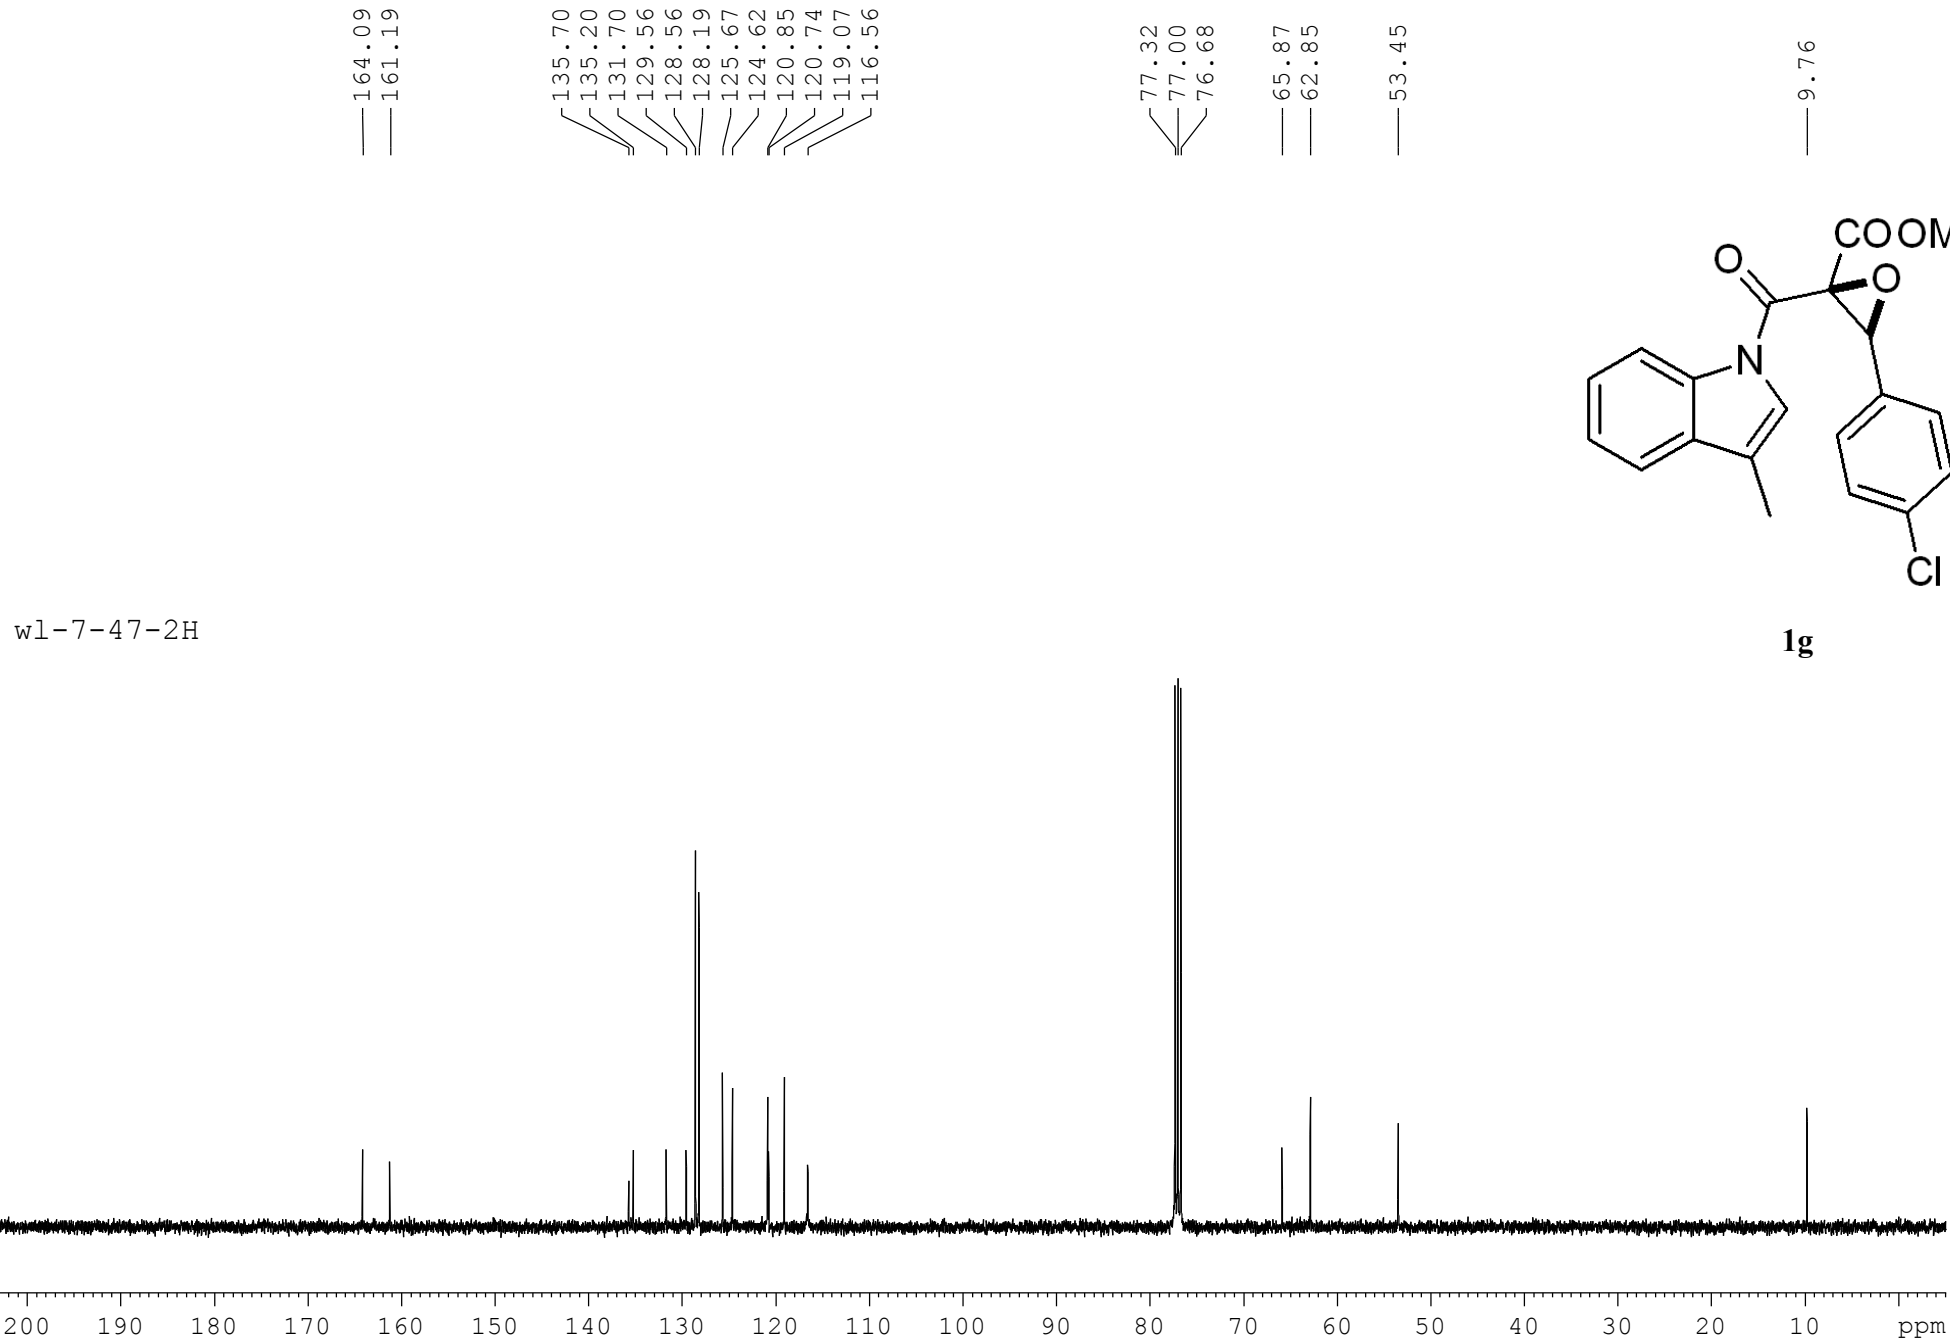

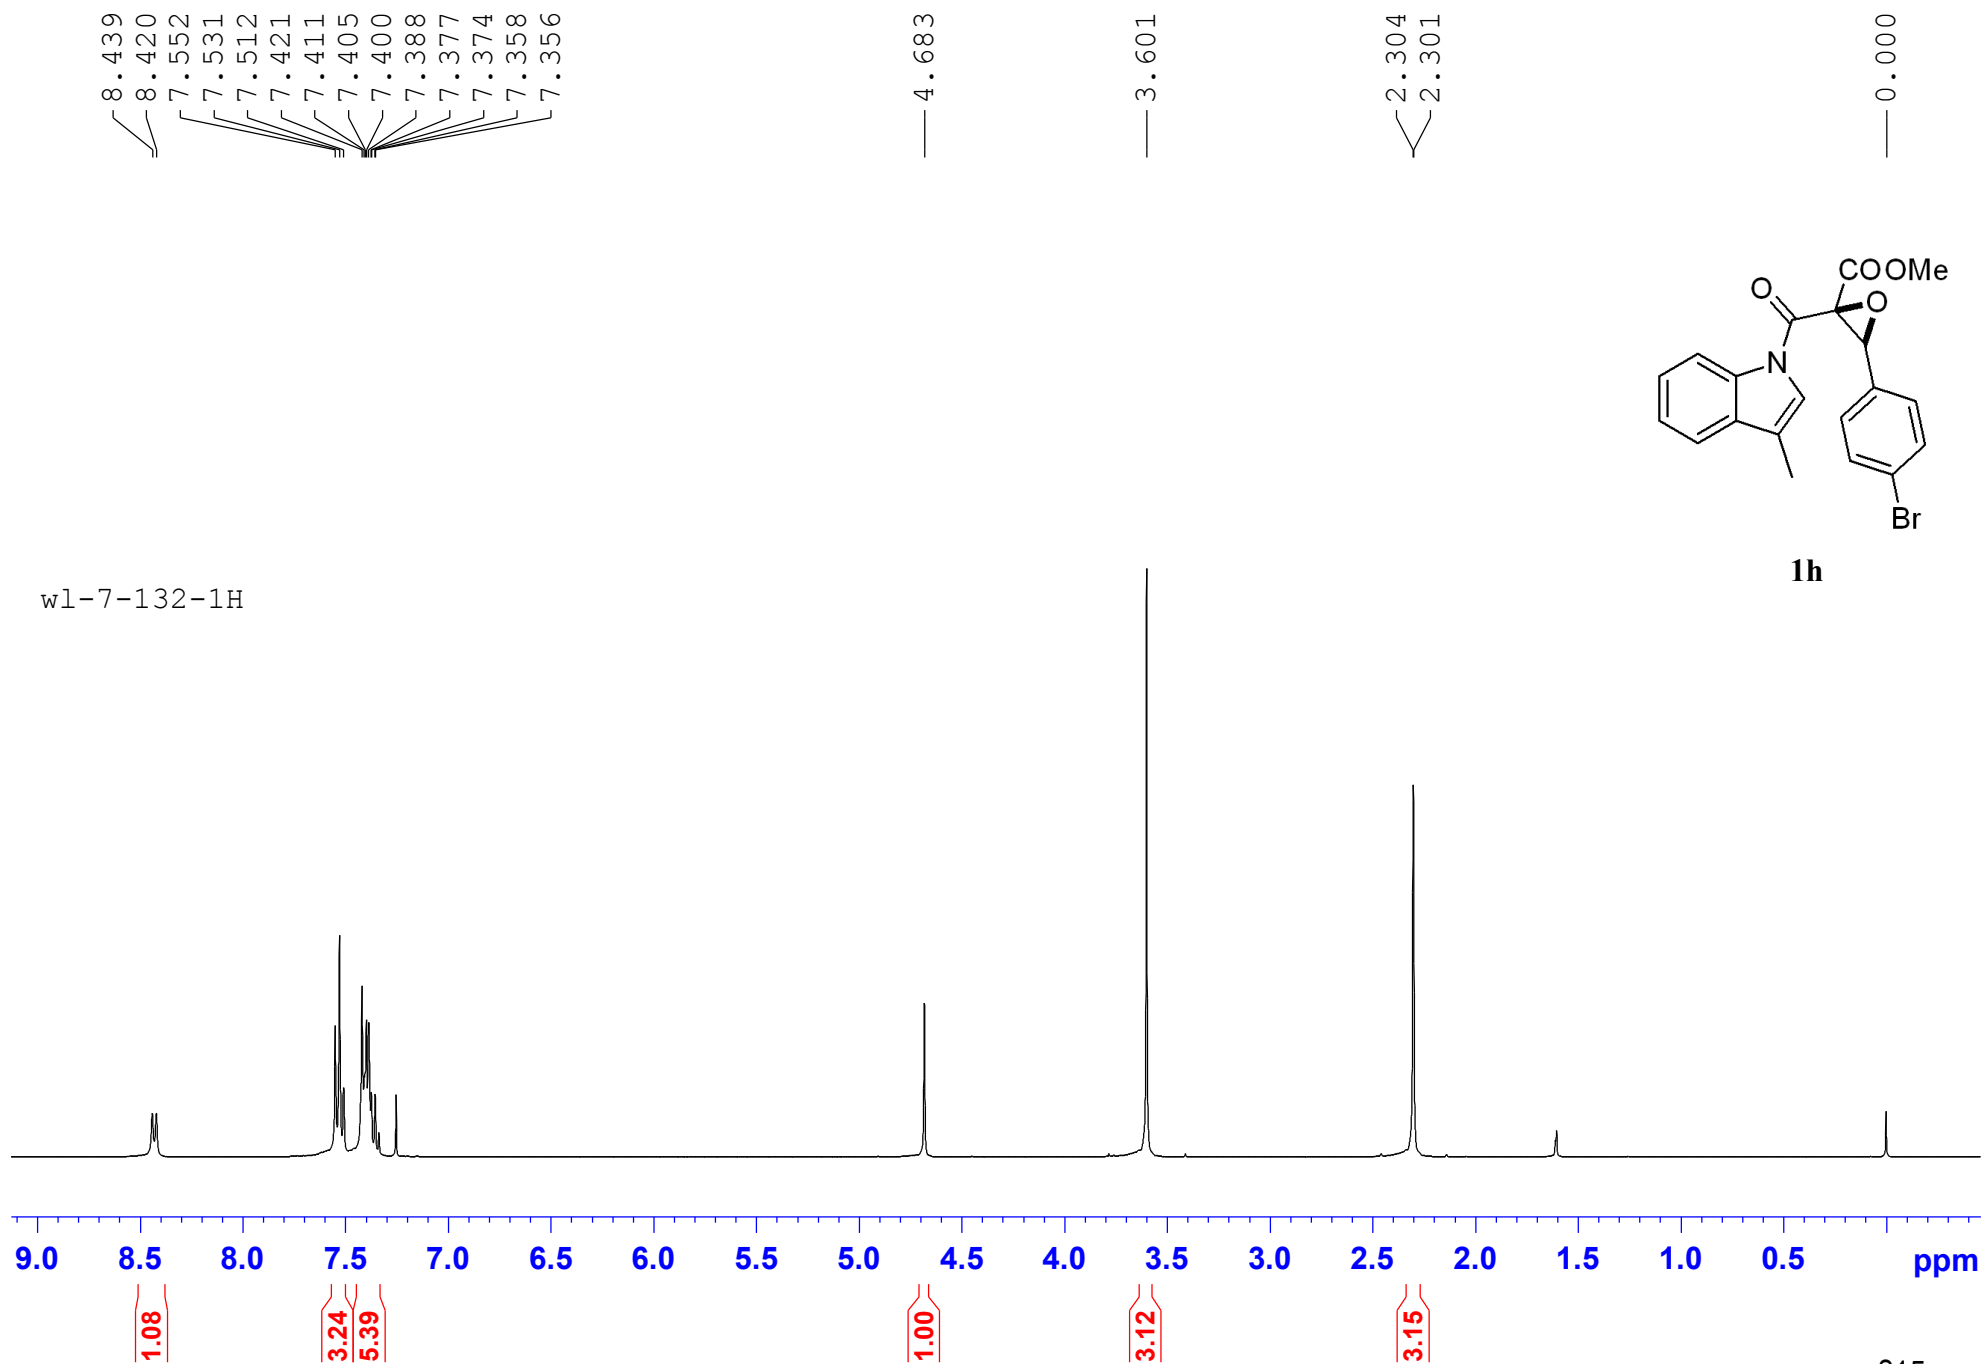

— 164.07  
— 161.16

135.70  
131.70  
131.49  
130.09  
128.46  
125.67  
124.62  
123.44  
120.84  
120.74  
119.07  
116.56

77.32  
77.00  
76.68

— 65.81  
— 62.89

— 53.46

— 9.76

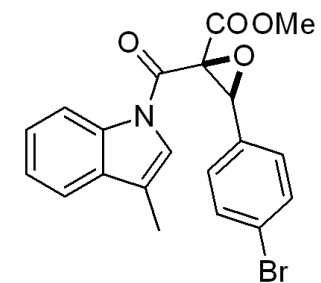

**1h**

w1-7-132-1C

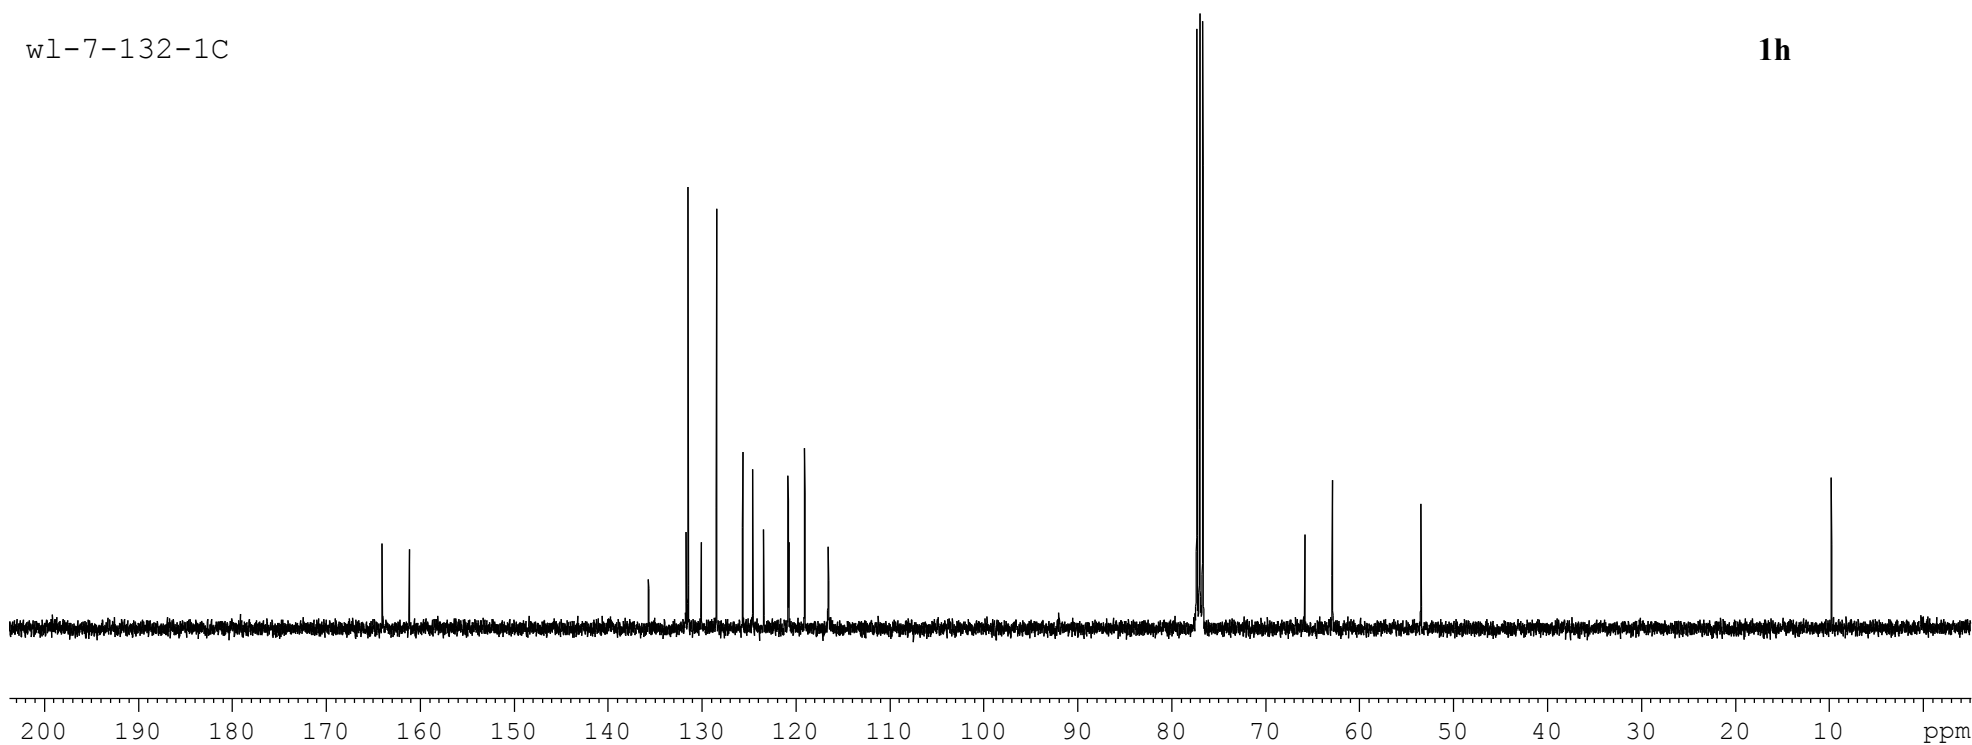



8.417  
8.397  
7.700  
7.679  
7.658  
7.637  
7.625  
7.521  
7.503  
7.419  
7.402  
7.384  
7.381  
7.370  
7.355  
7.336

4.762

3.584

2.298

0.000

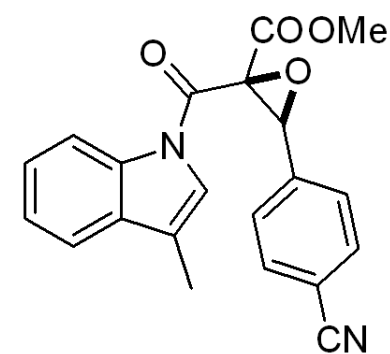

w1-7-76-4H

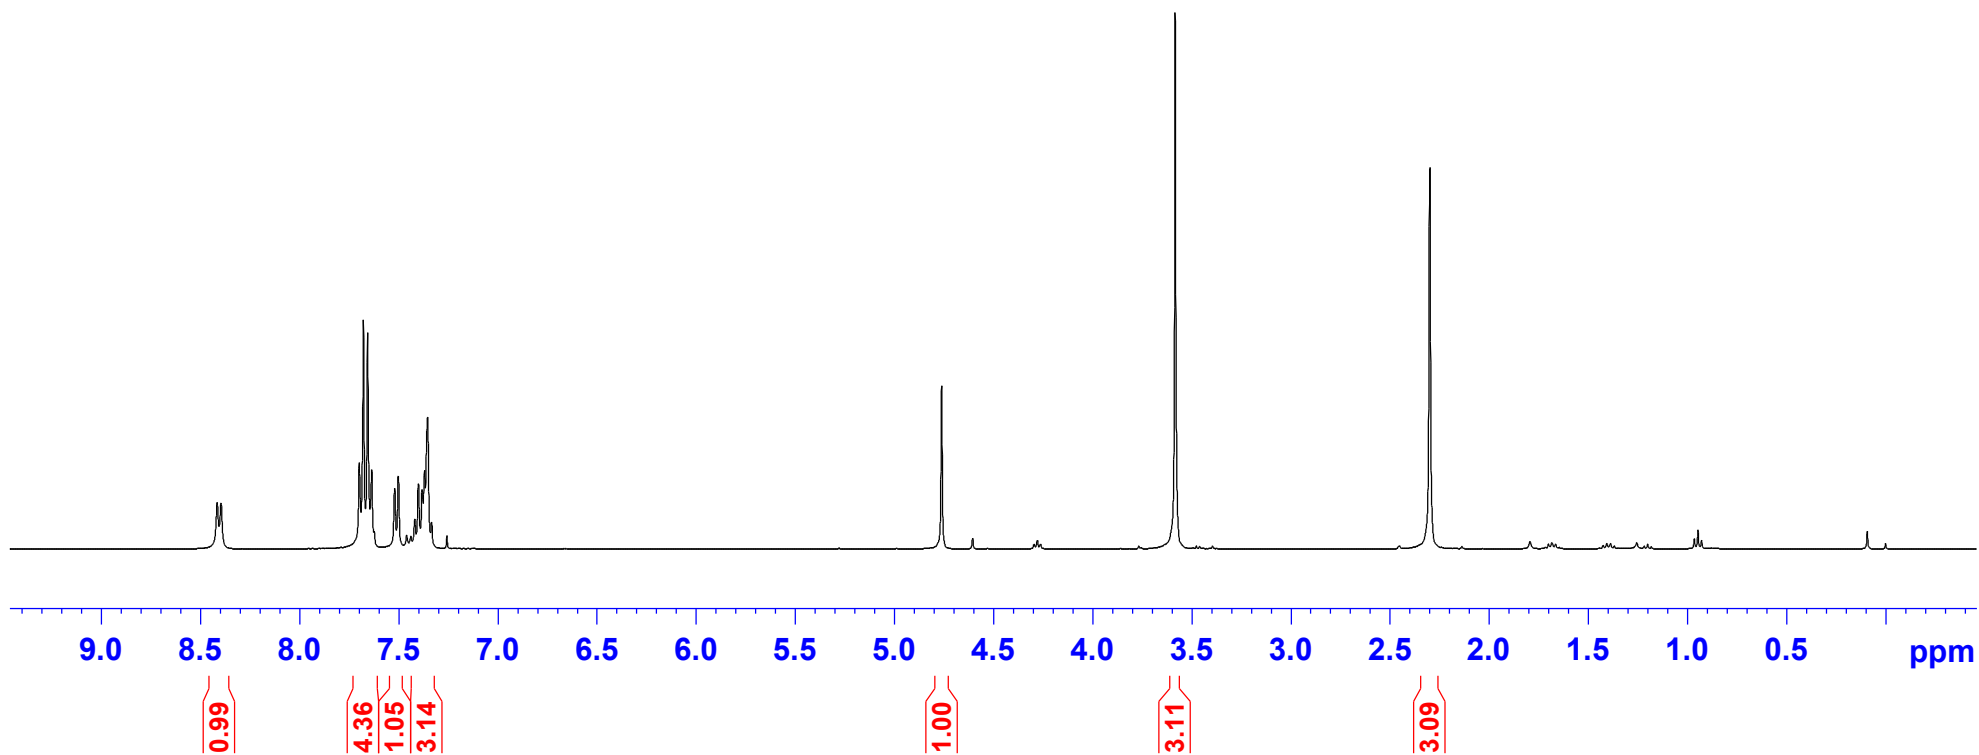

— 163.69  
— 160.66

136.09  
135.55  
132.10  
131.90  
131.58  
127.55  
126.85  
125.64  
124.62  
120.87  
120.53  
119.04  
118.16  
116.41  
112.94

77.31  
77.00  
76.68

— 65.70  
— 62.42

— 53.49

— 9.66

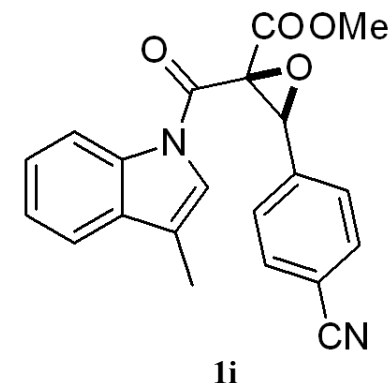

WL-7-76-4c

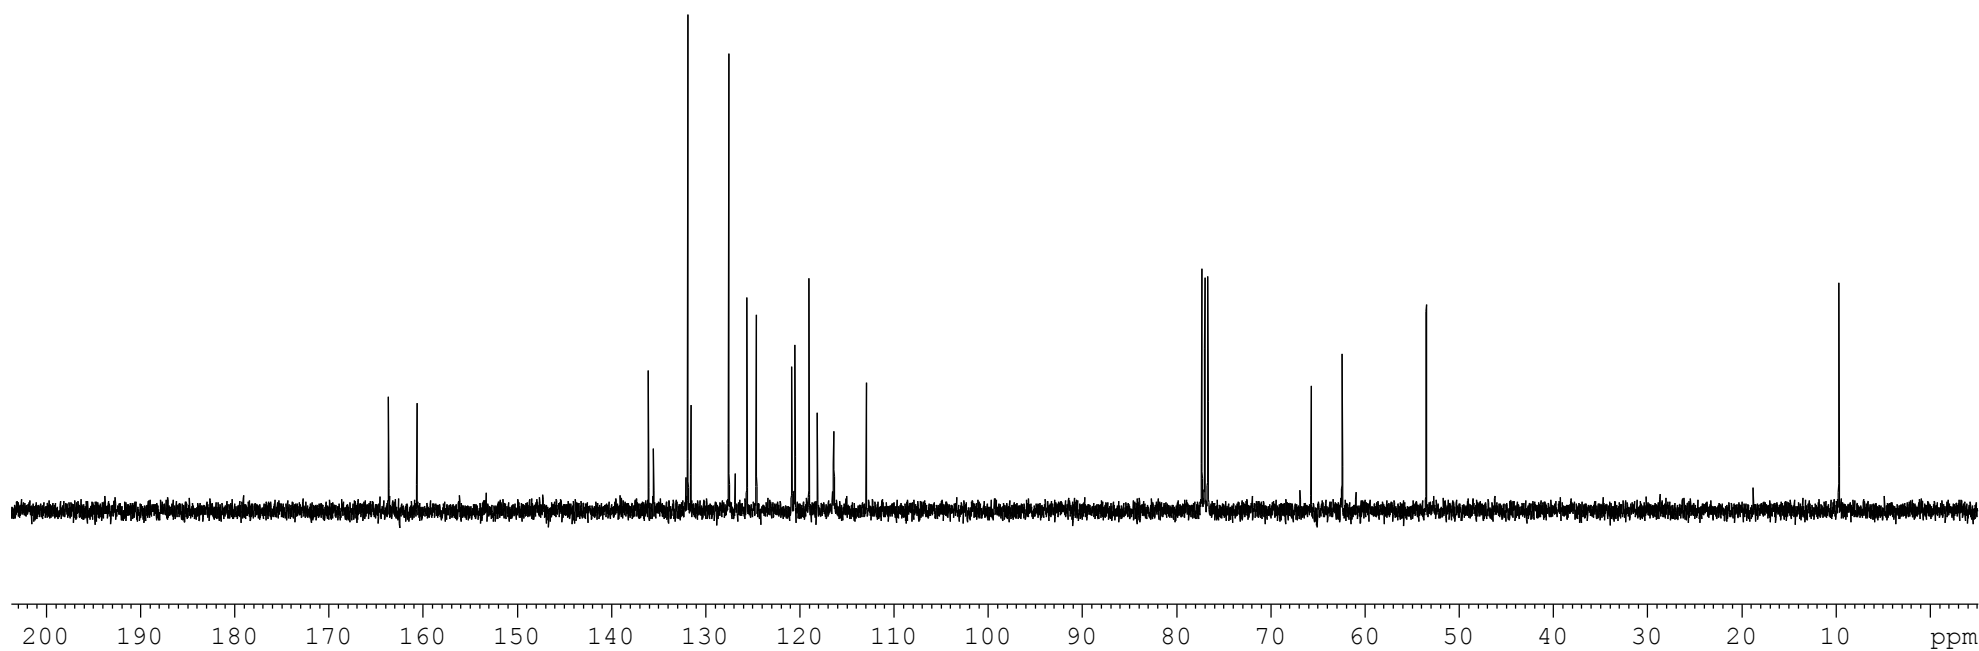

8.283  
7.465  
7.457  
7.315  
7.303  
7.293  
7.249  
7.122  
7.102  
7.035  
7.016

4.672

3.836

2.254  
2.242

0.000

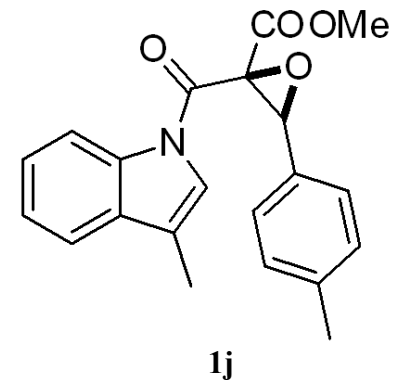

w1-7-147-4H

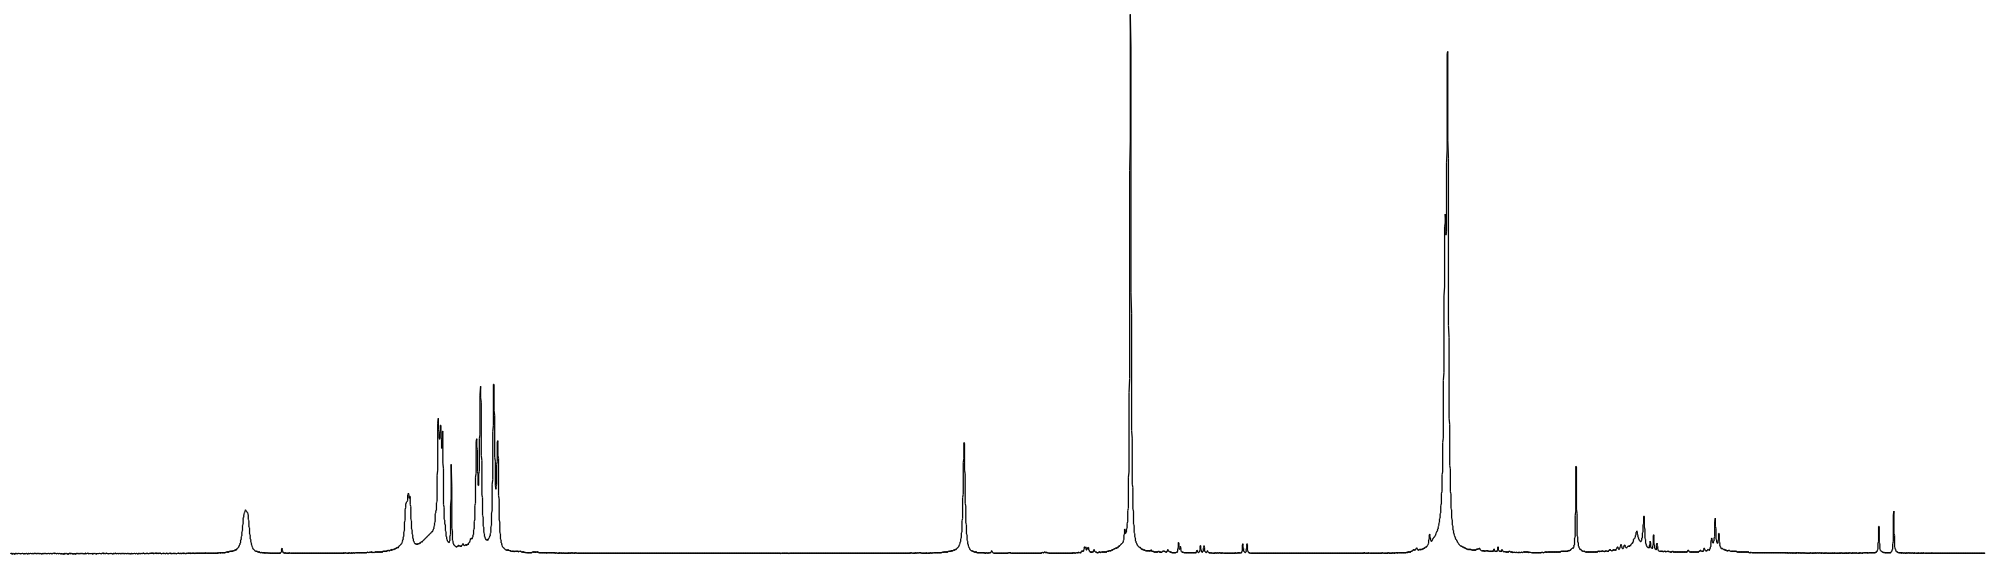

9.0 8.5 8.0 7.5 7.0 6.5 6.0 5.5 5.0 4.5 4.0 3.5 3.0 2.5 2.0 1.5 1.0 0.5 ppm

0.98  
1.14  
3.00  
2.30  
2.08  
1.00  
3.03  
6.10

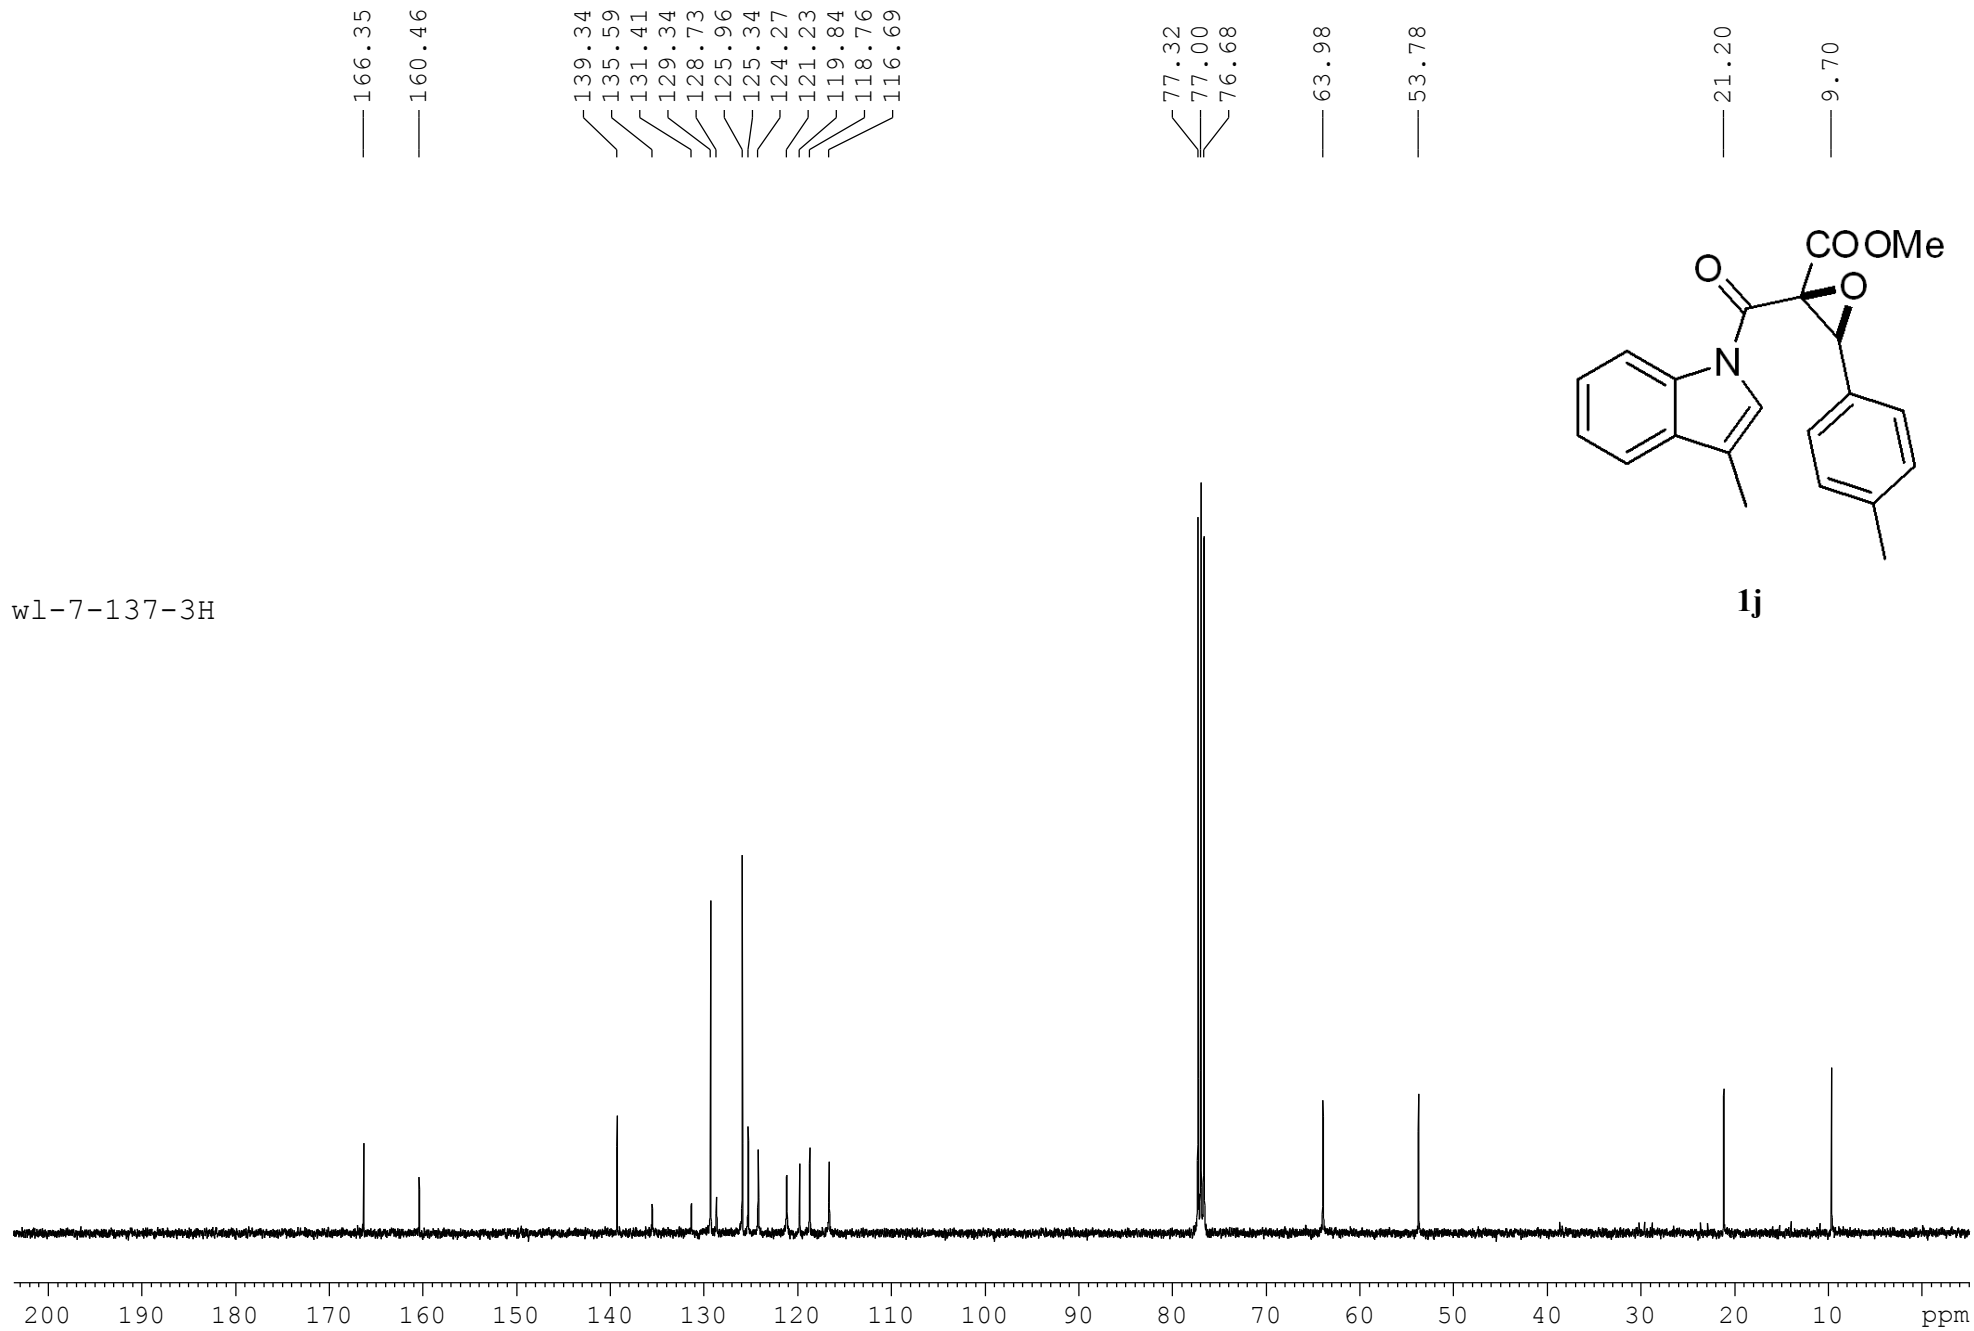

8.291  
8.283  
7.462  
7.453  
7.445  
7.304  
7.295  
7.286  
7.154  
7.134  
6.741  
6.719

4.662

3.819  
3.674

2.239

0.000

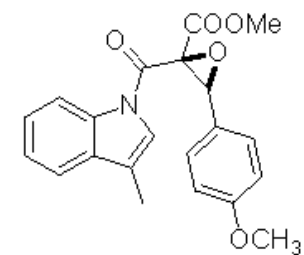

1k

w1-7-137-3H

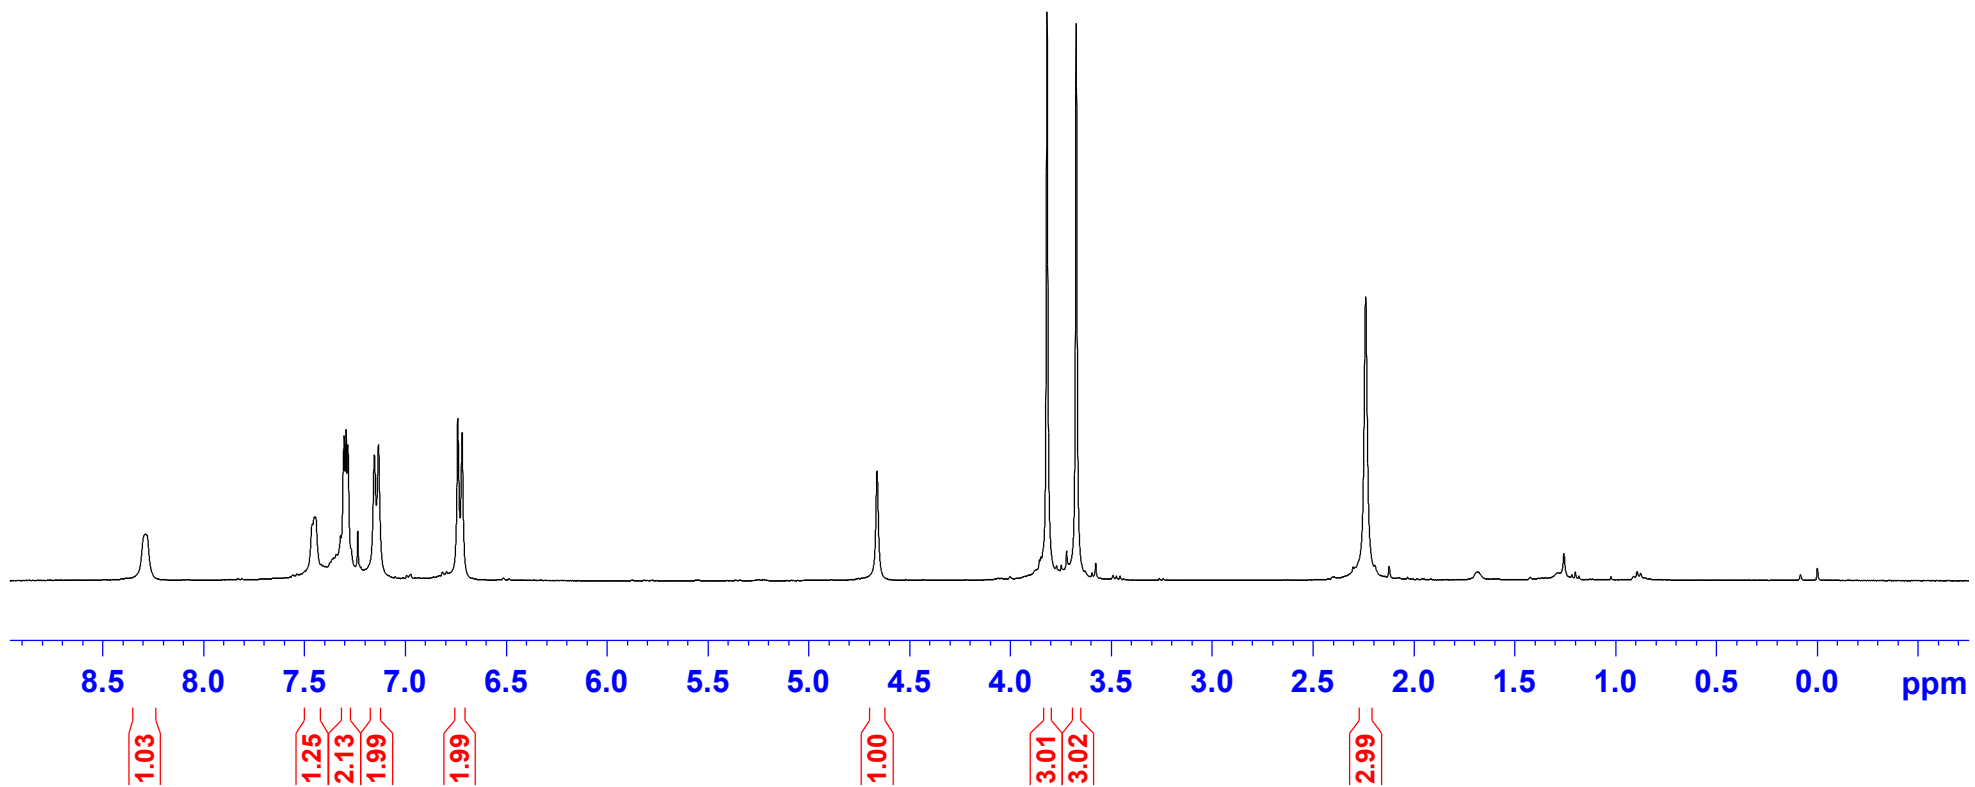

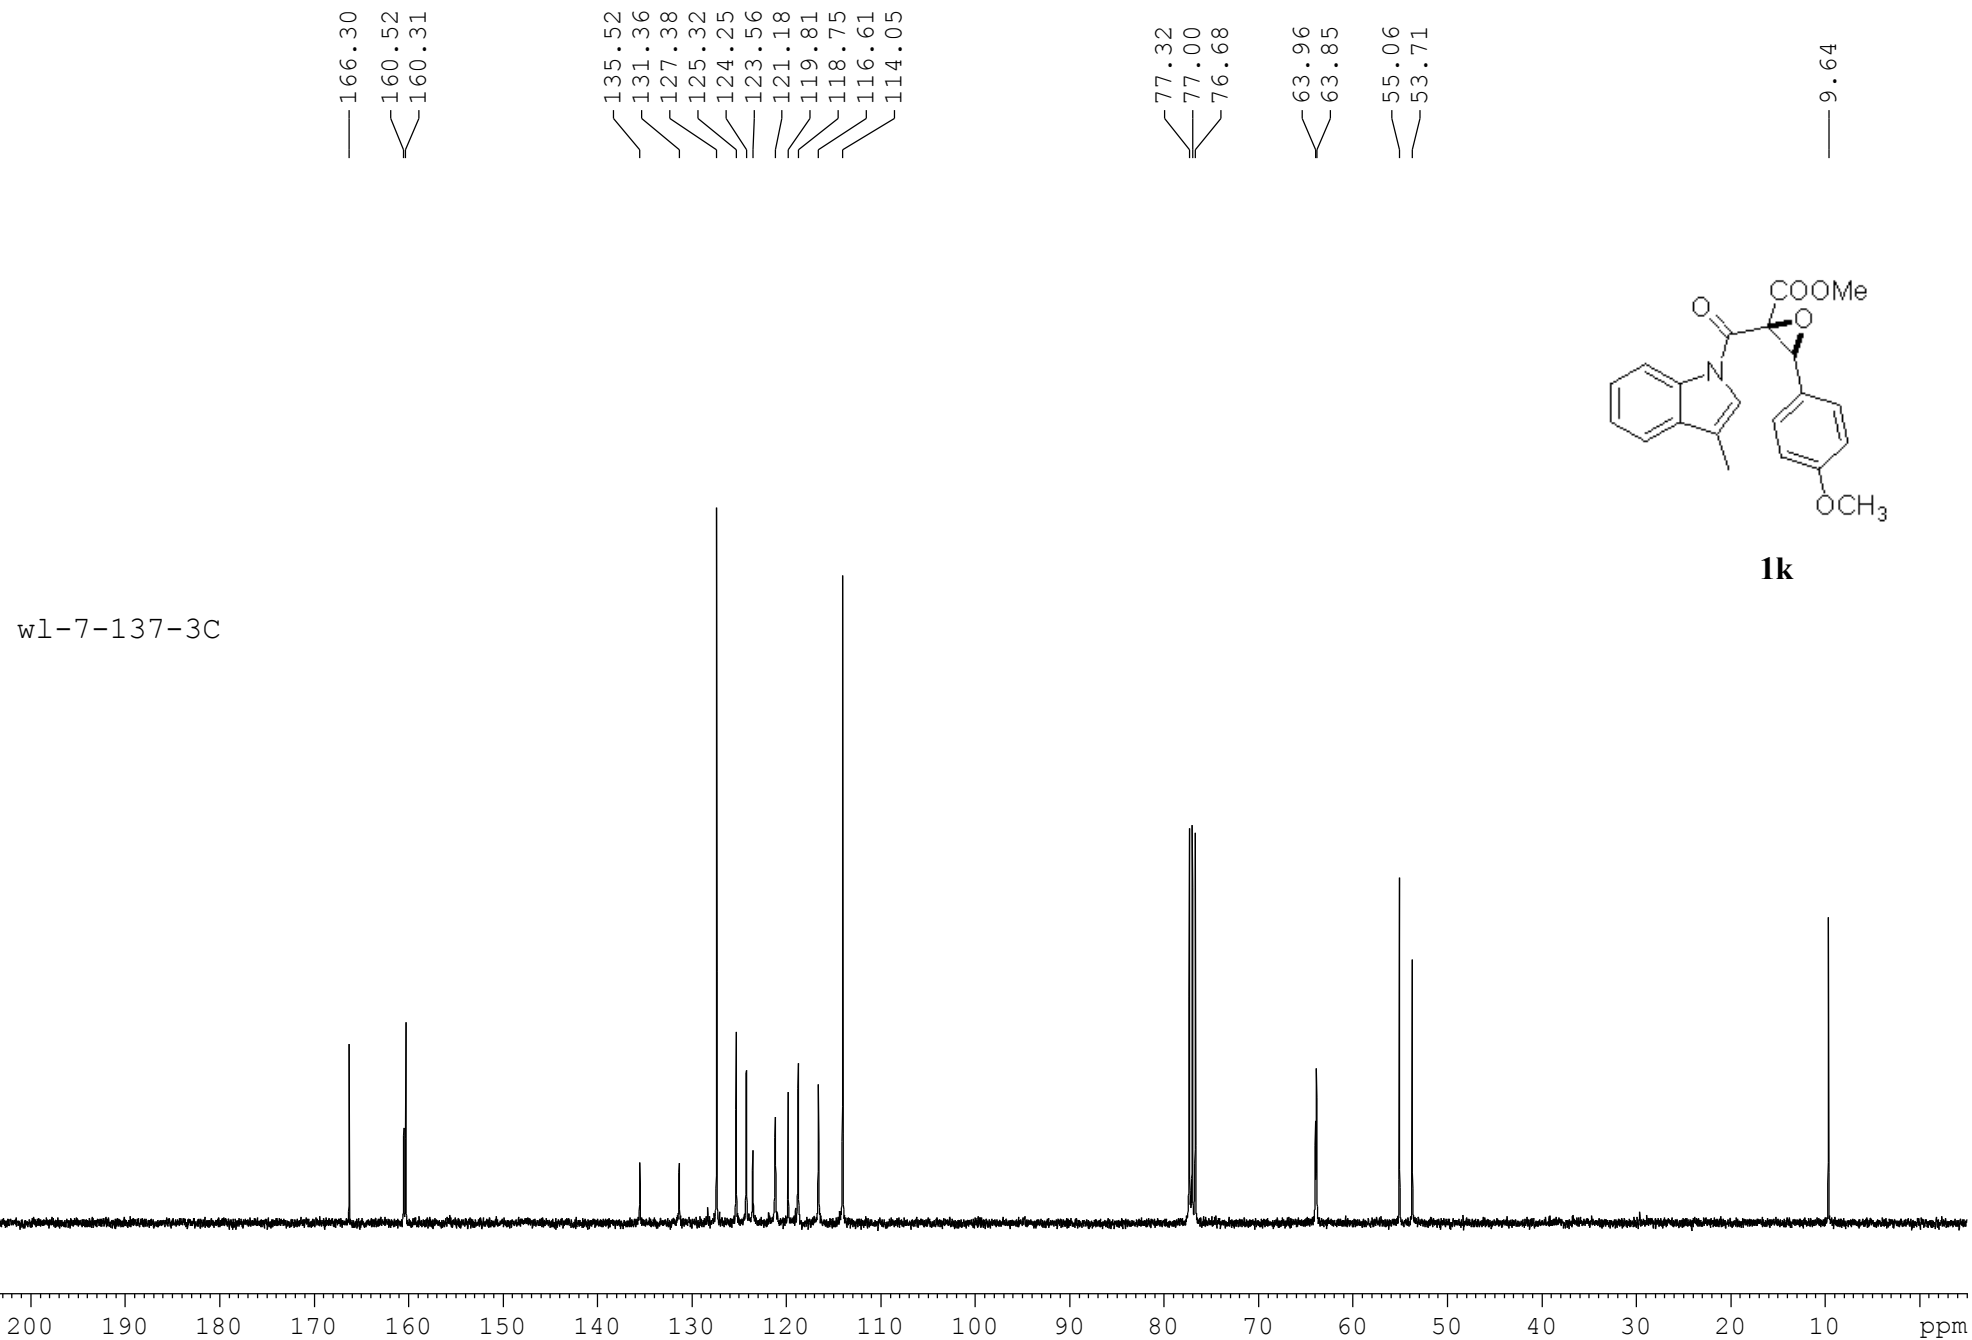

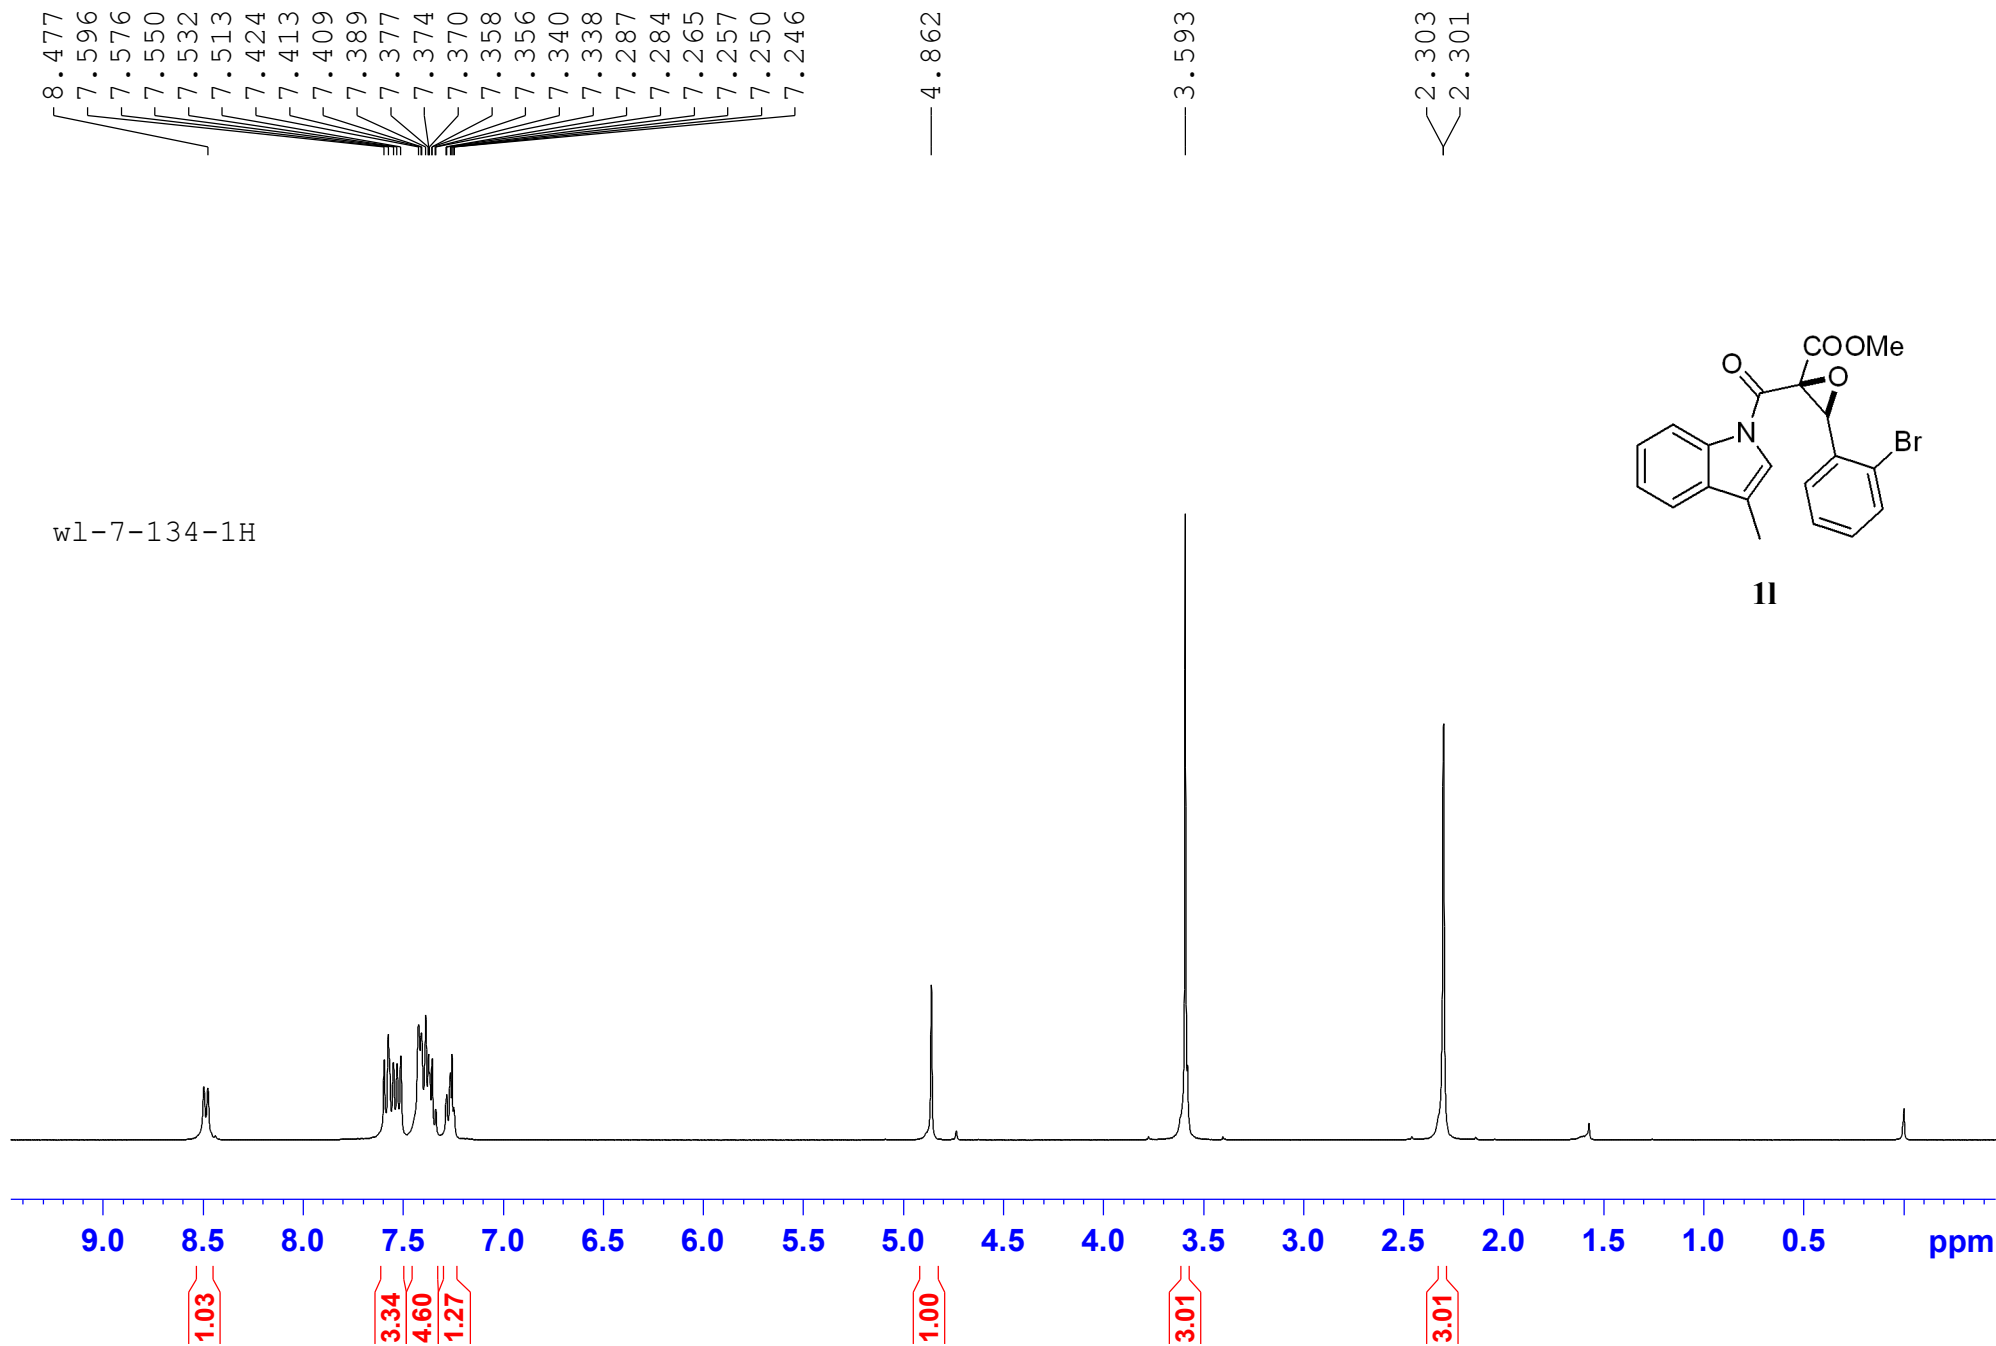

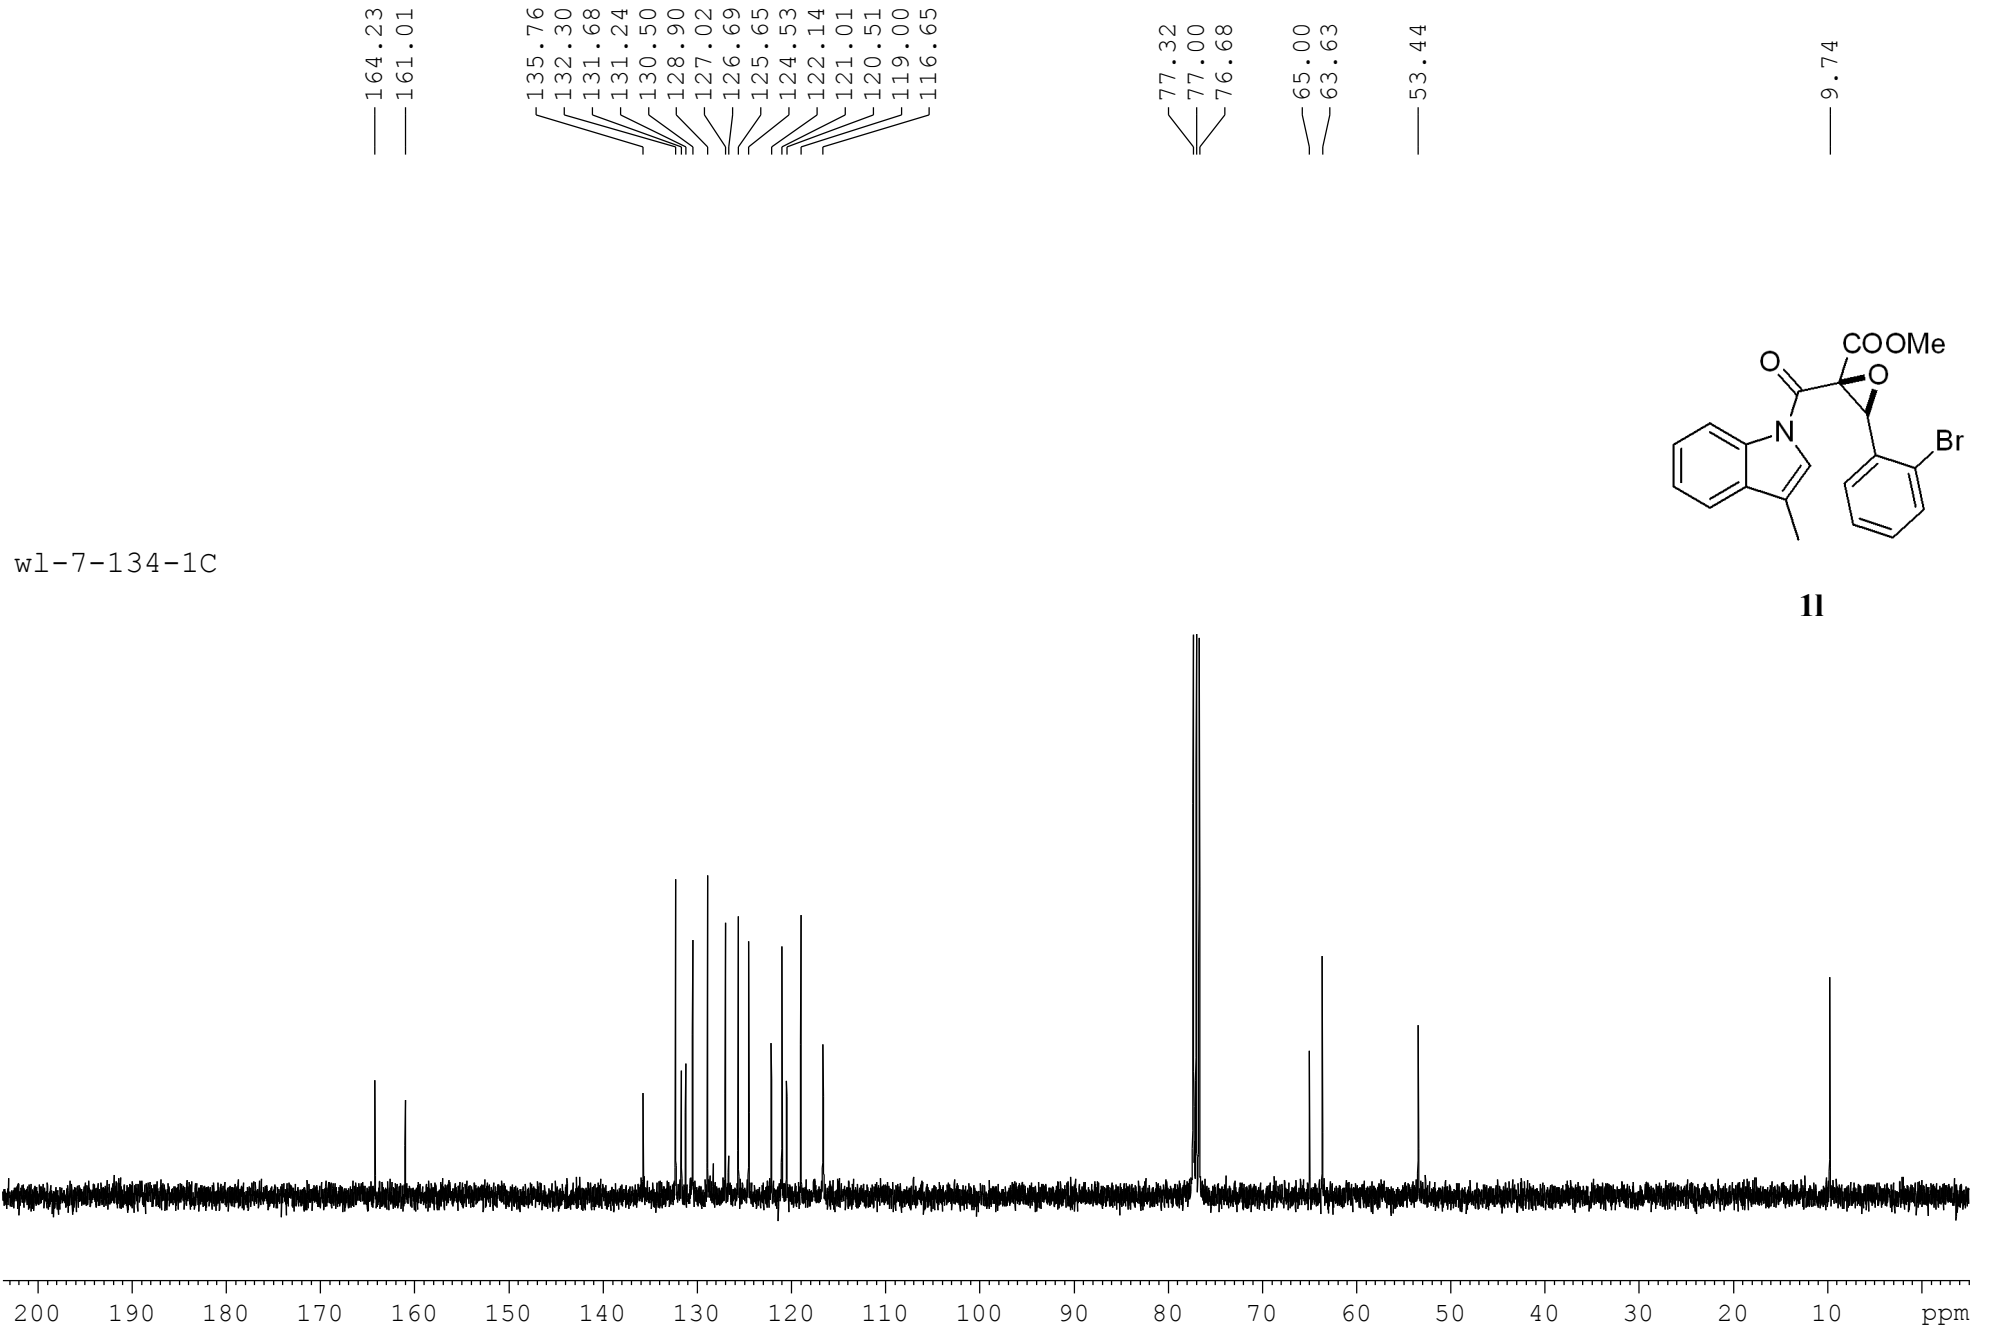



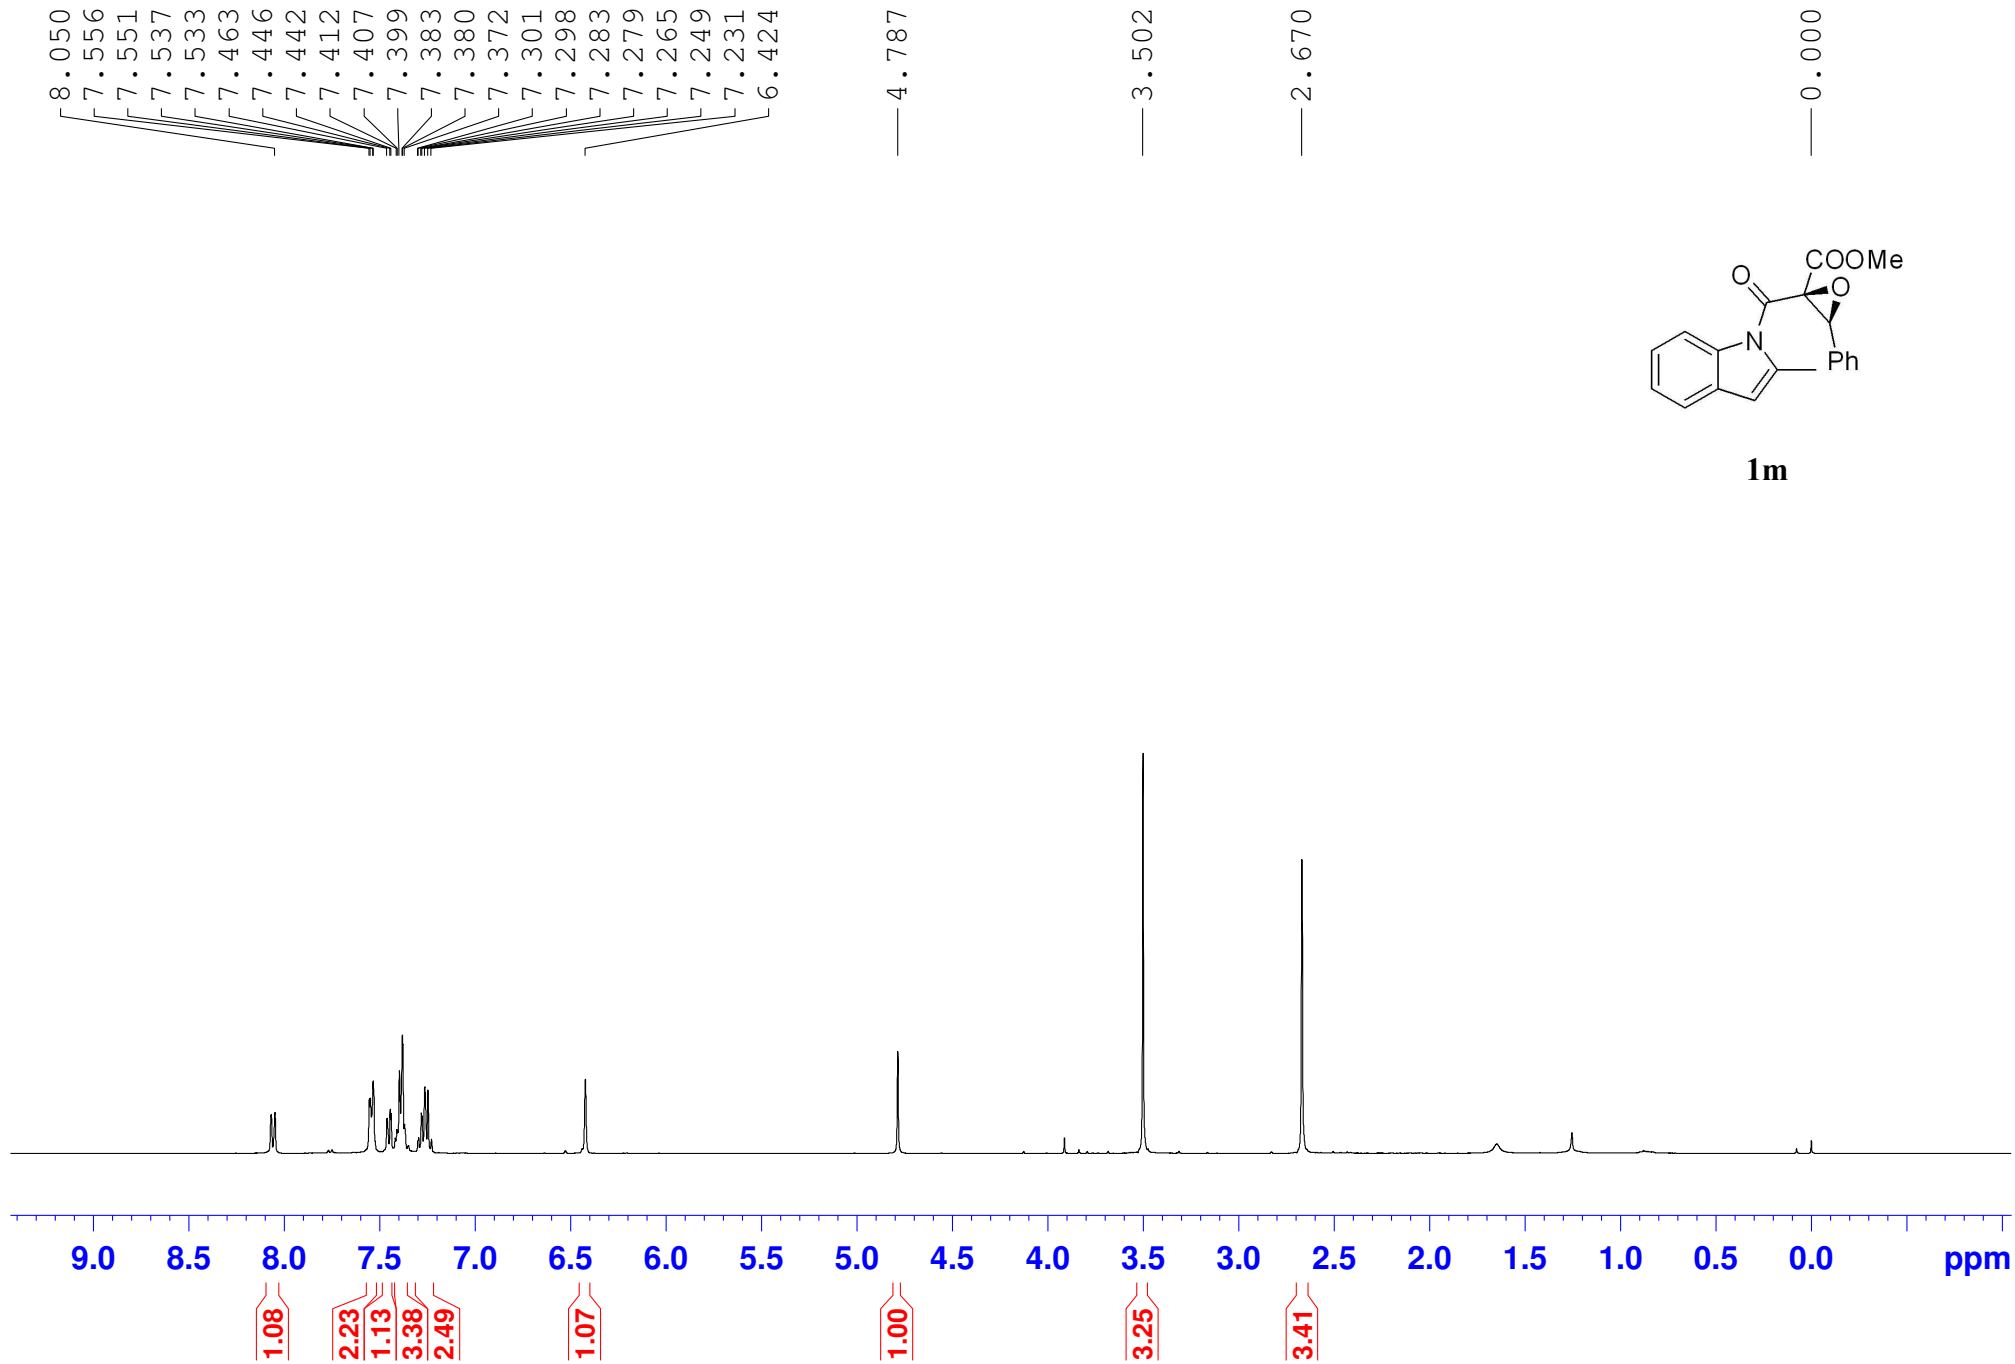

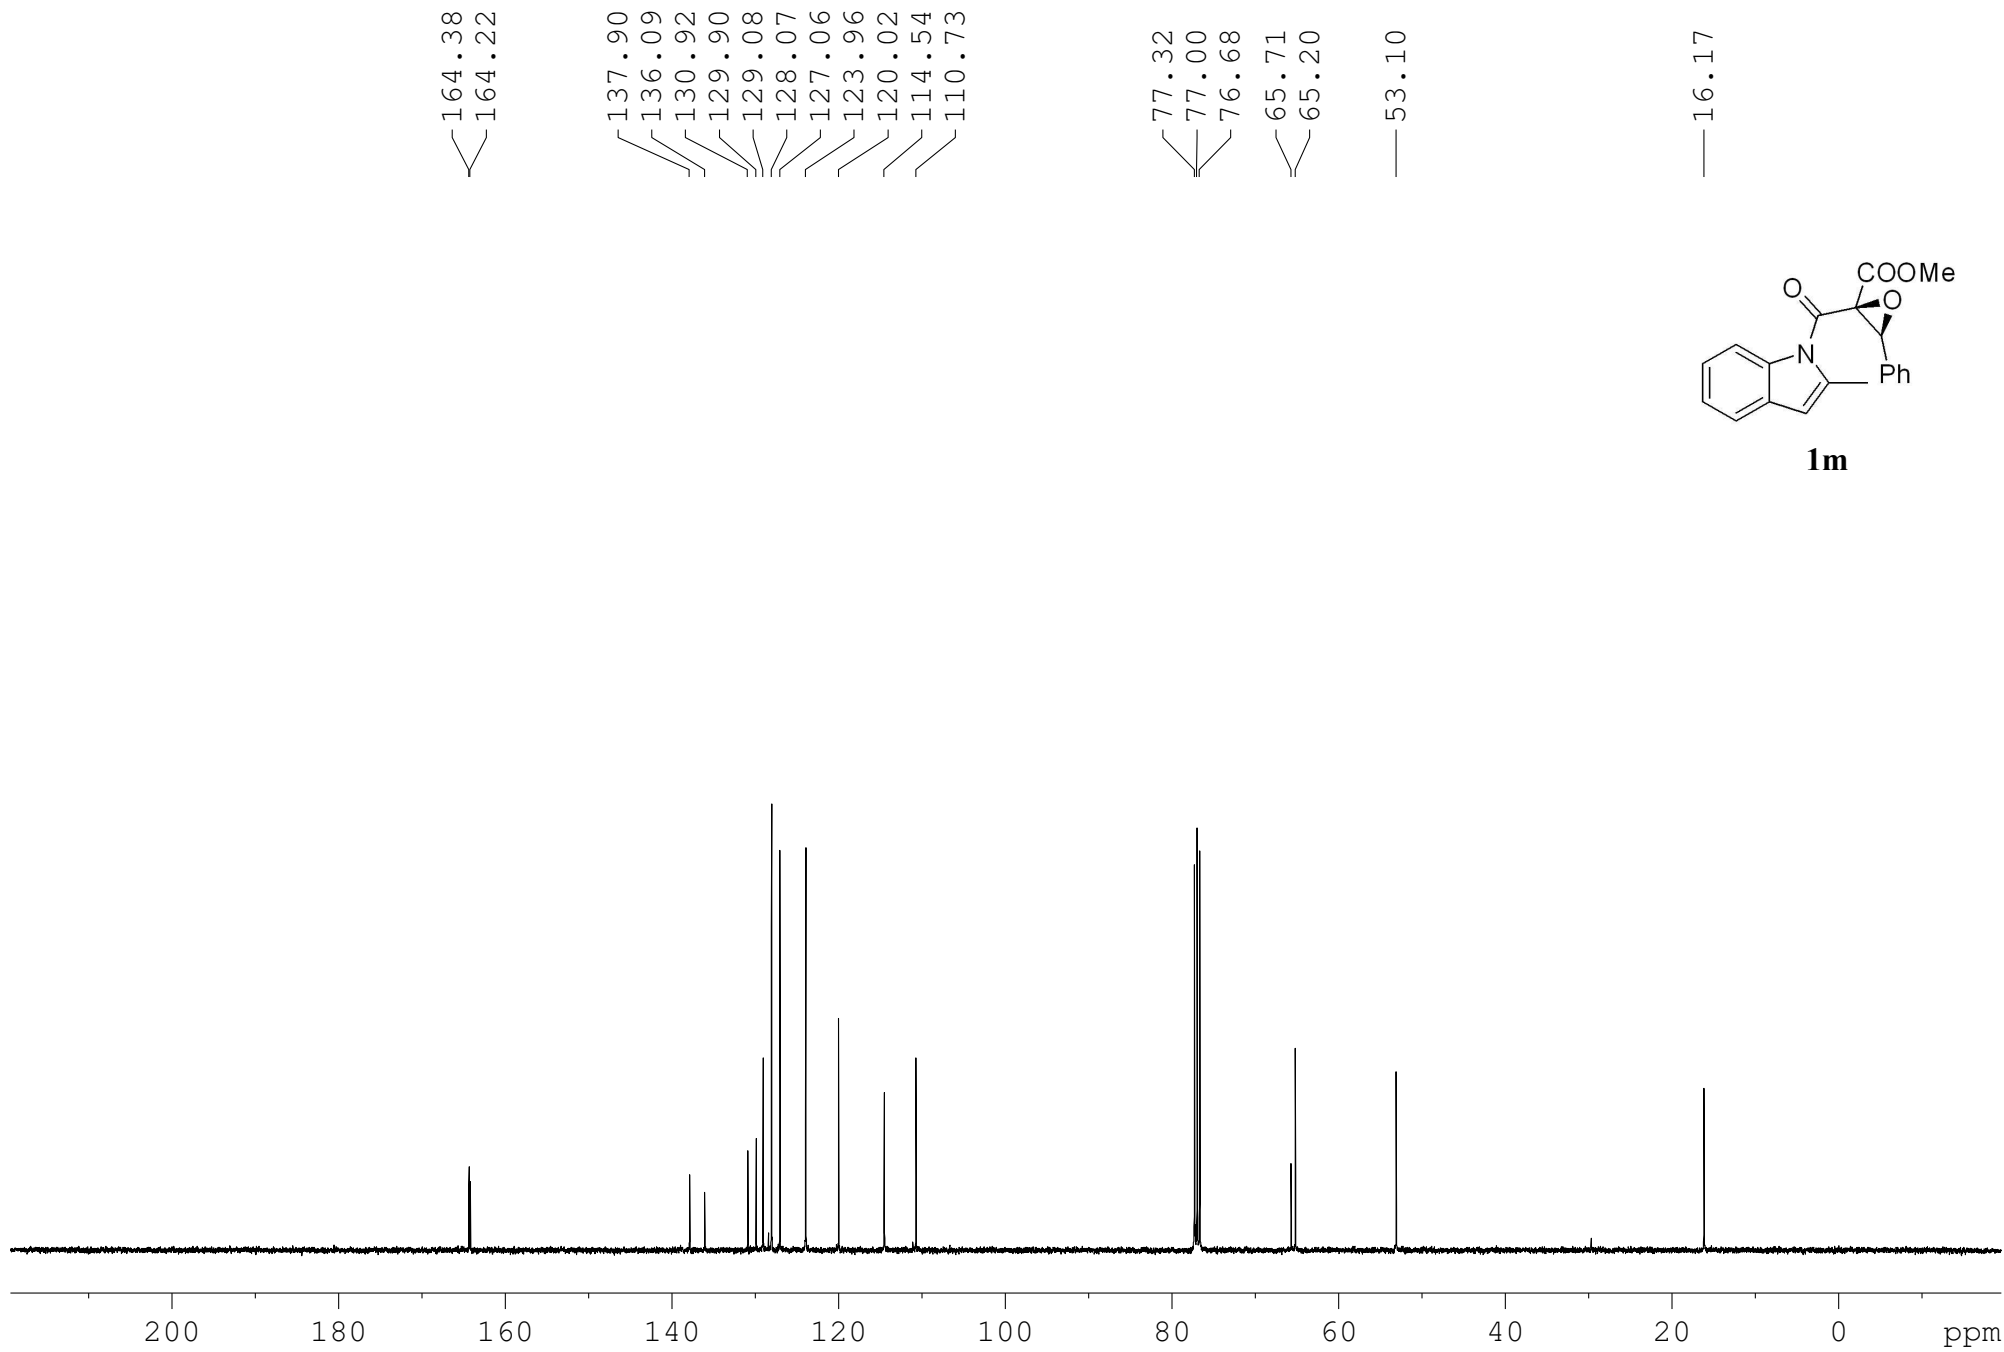

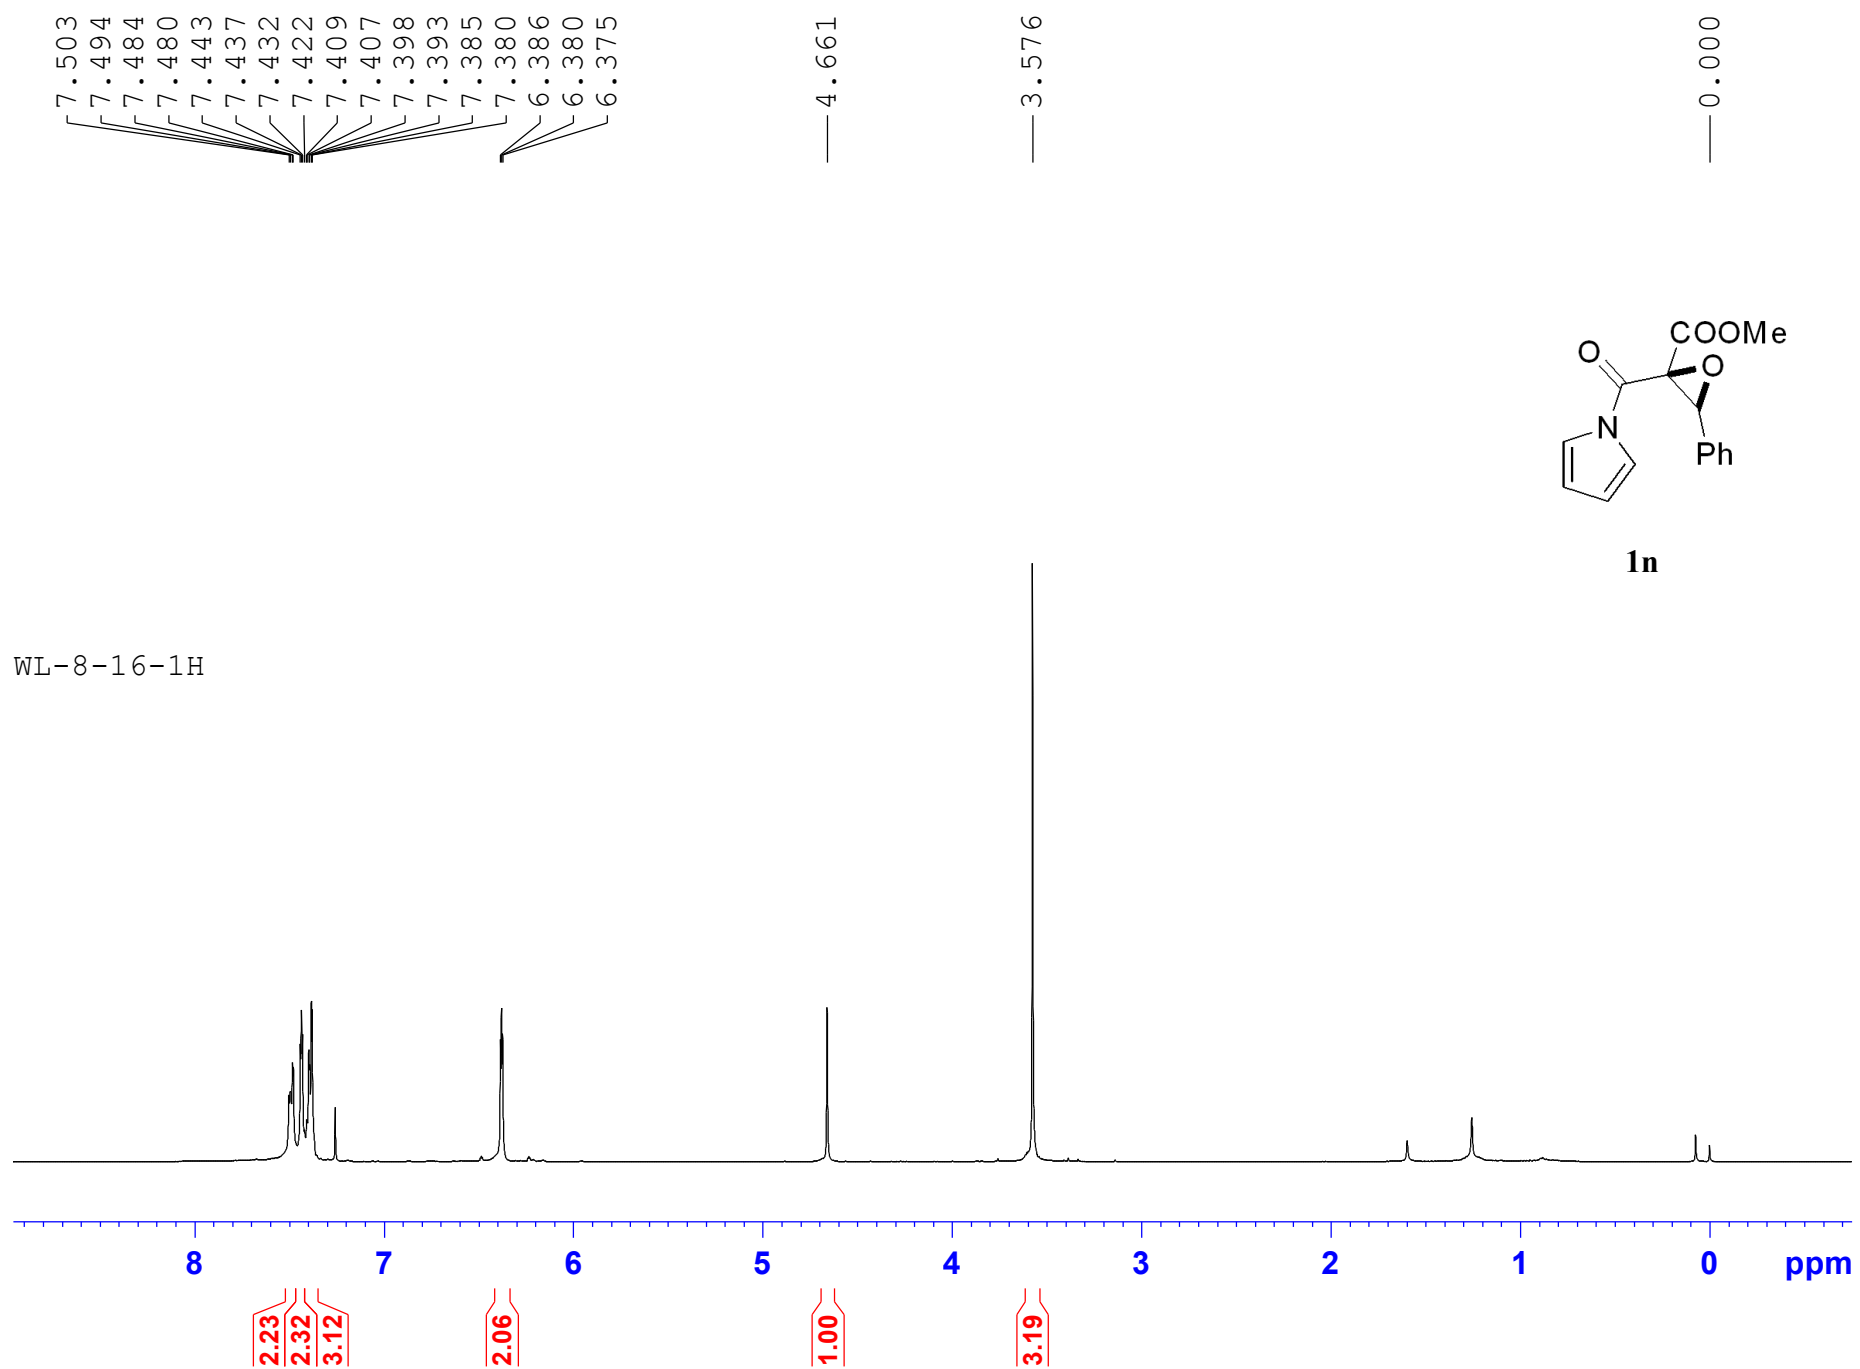

163.88  
161.55

130.83  
129.23  
128.29  
126.66  
119.57  
114.46

77.32  
77.00  
76.68

65.14  
62.90

53.25

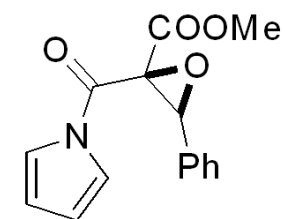

**1n**

WL-8-16-1C

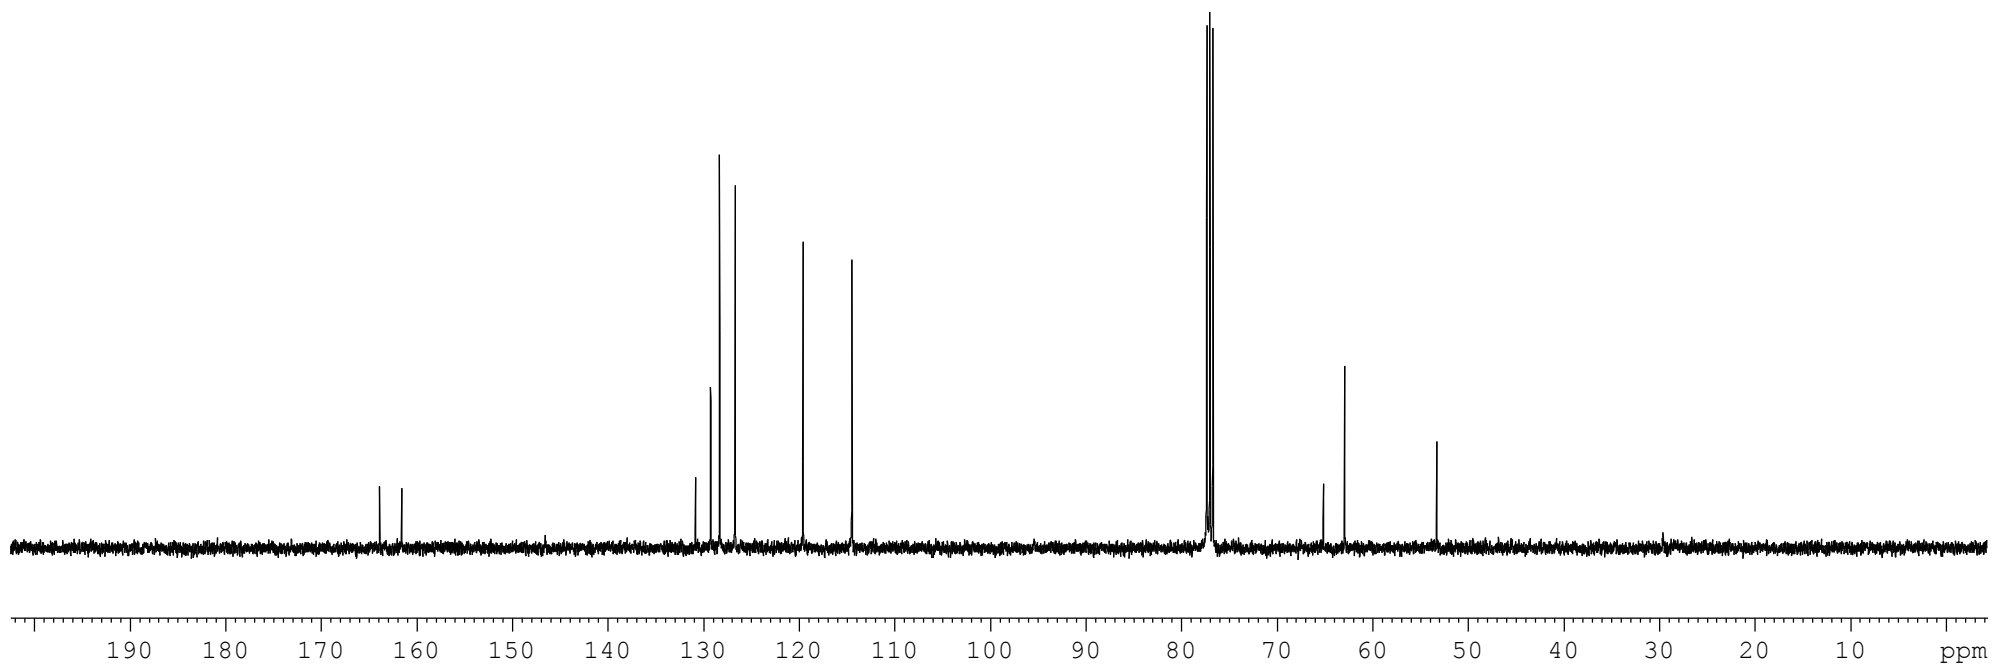

w1-8-64-1H

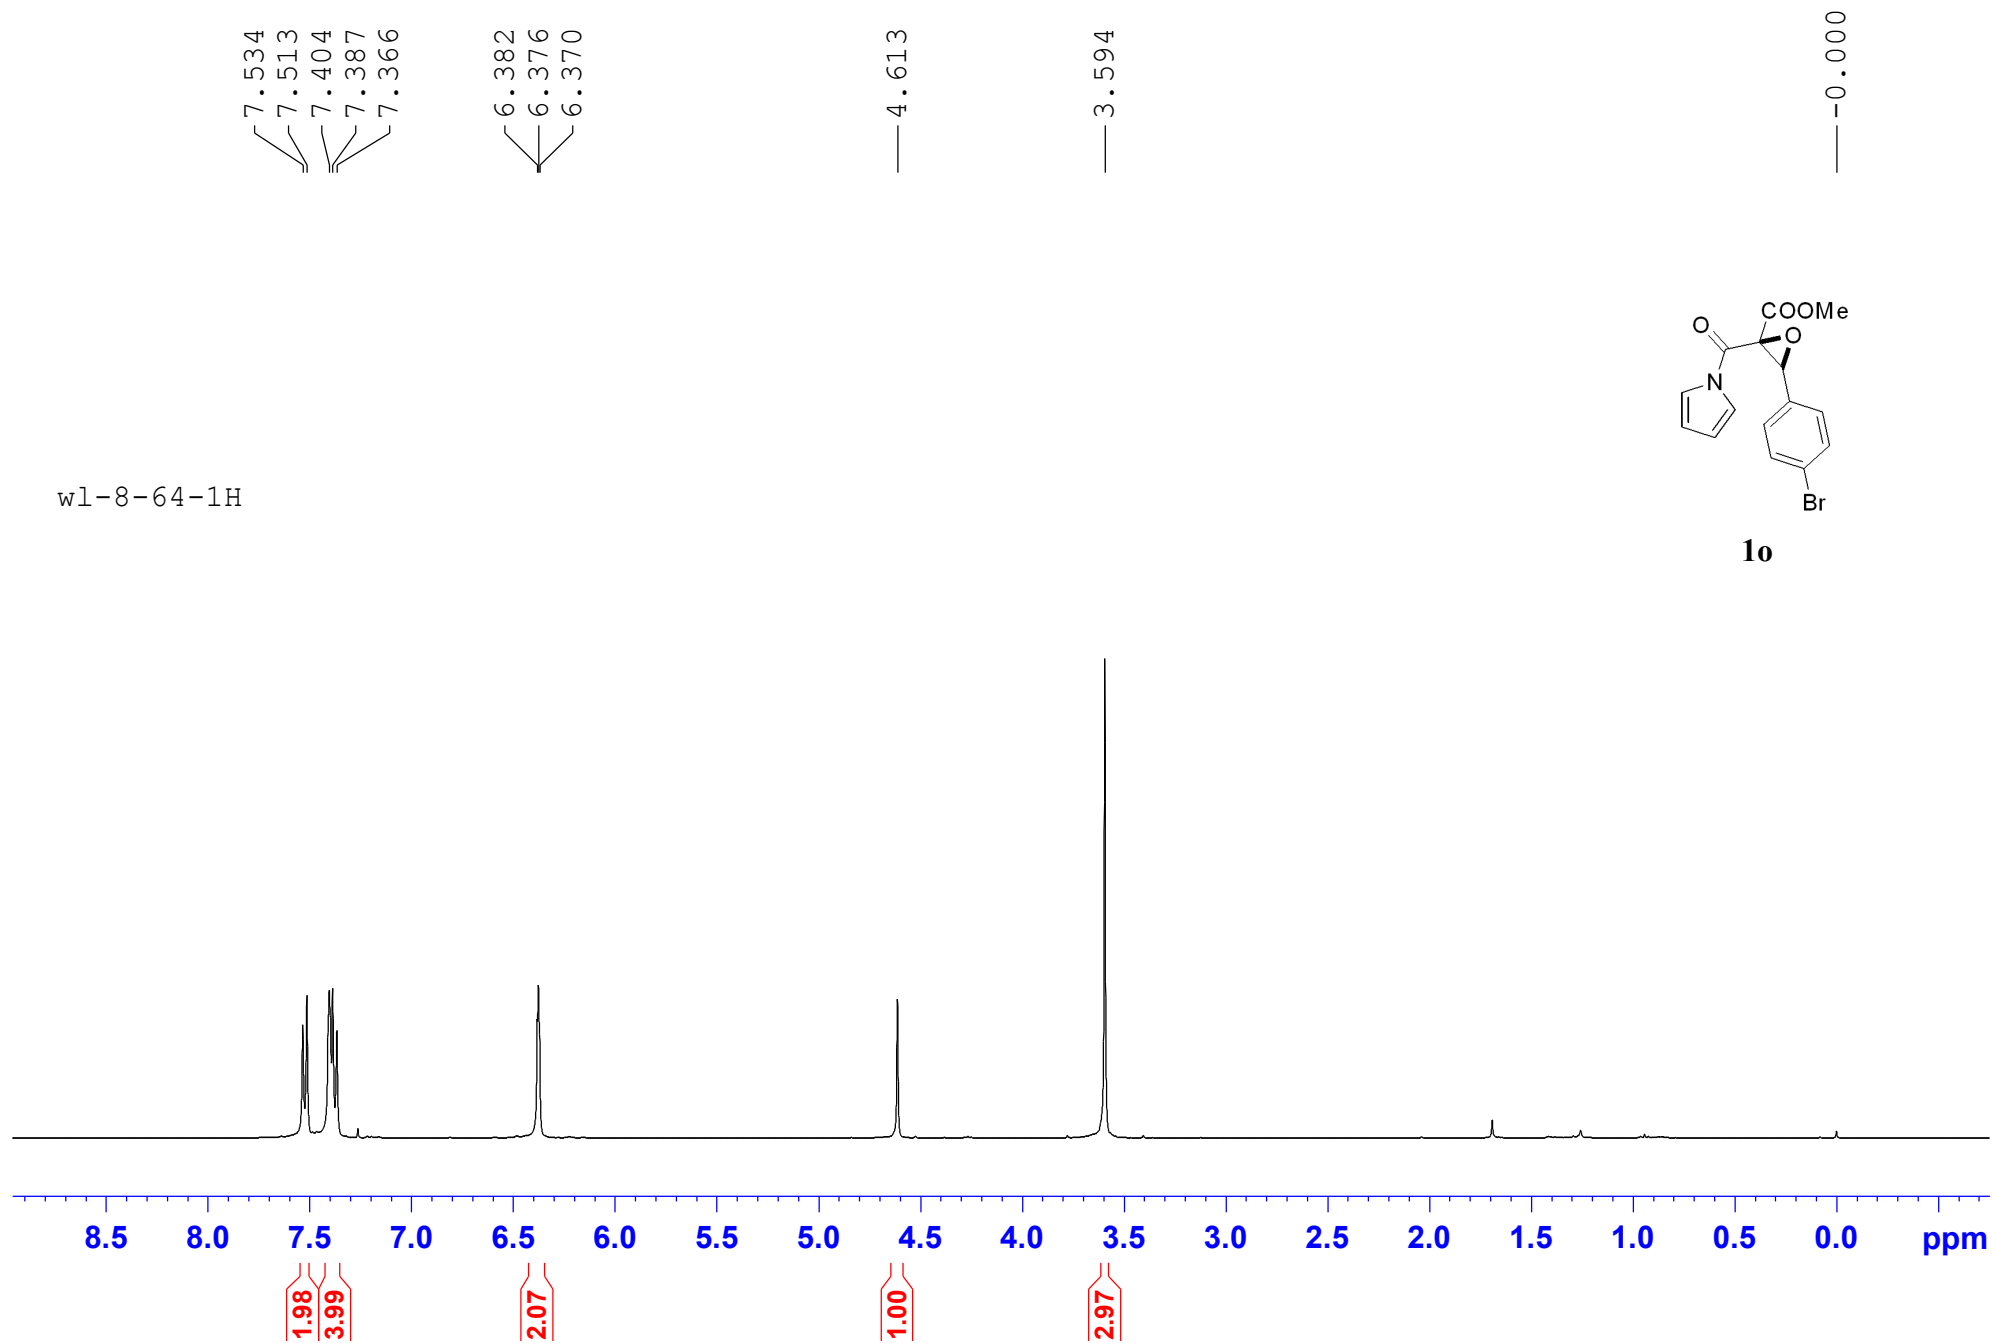

163.62  
161.21

131.46  
129.81  
128.40  
123.48  
119.45  
114.53

77.32  
77.00  
76.68

64.95  
62.31

53.37

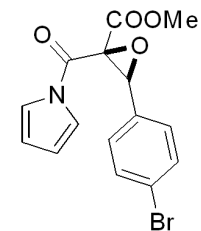

**1o**

w1-8-64-1C

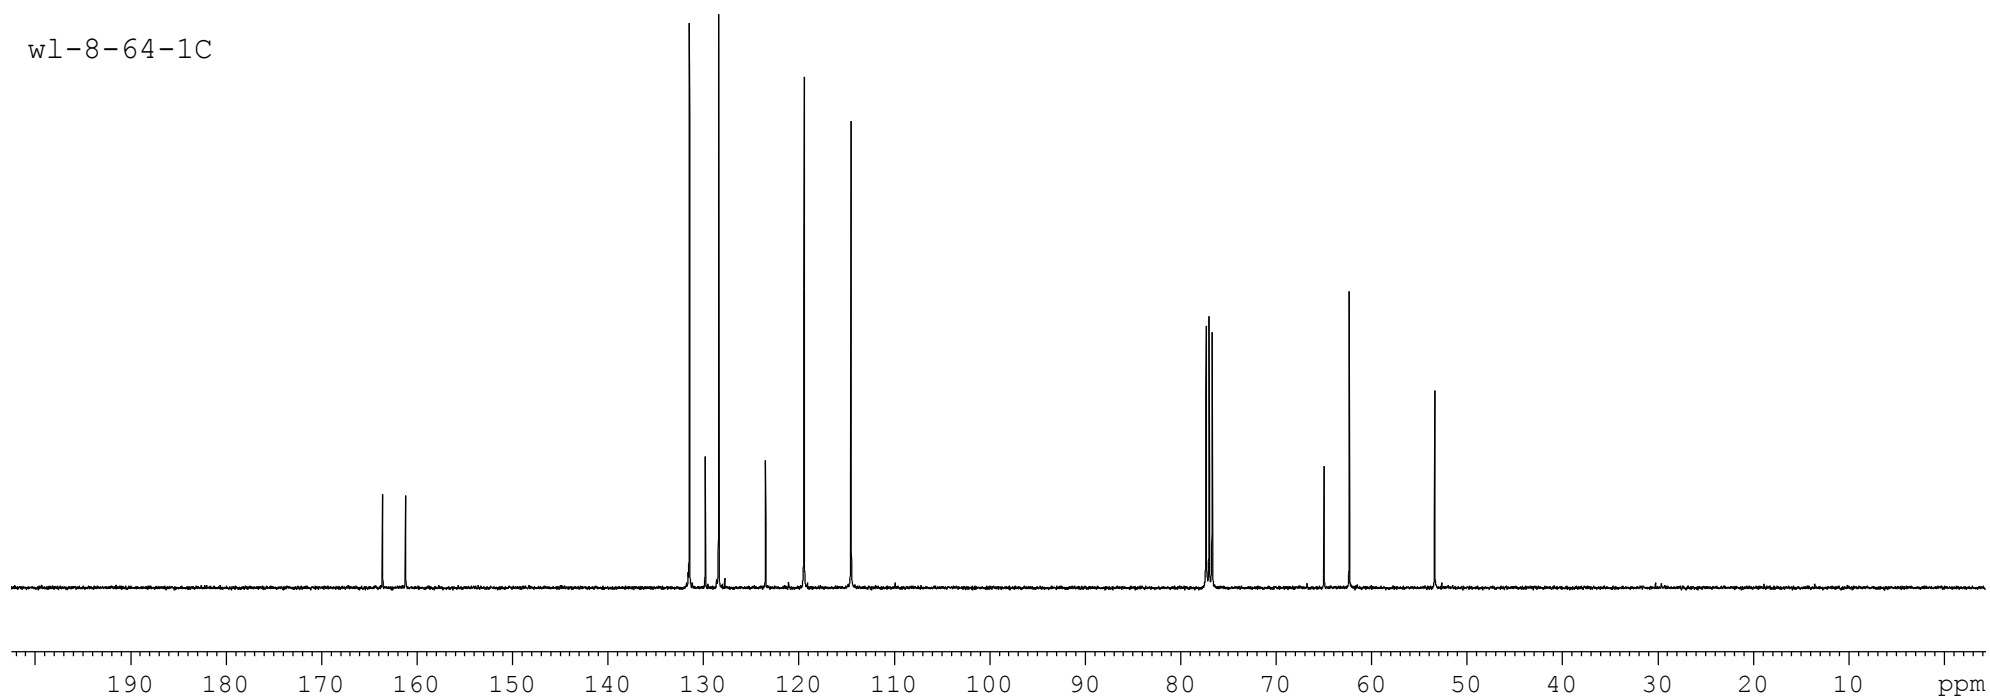

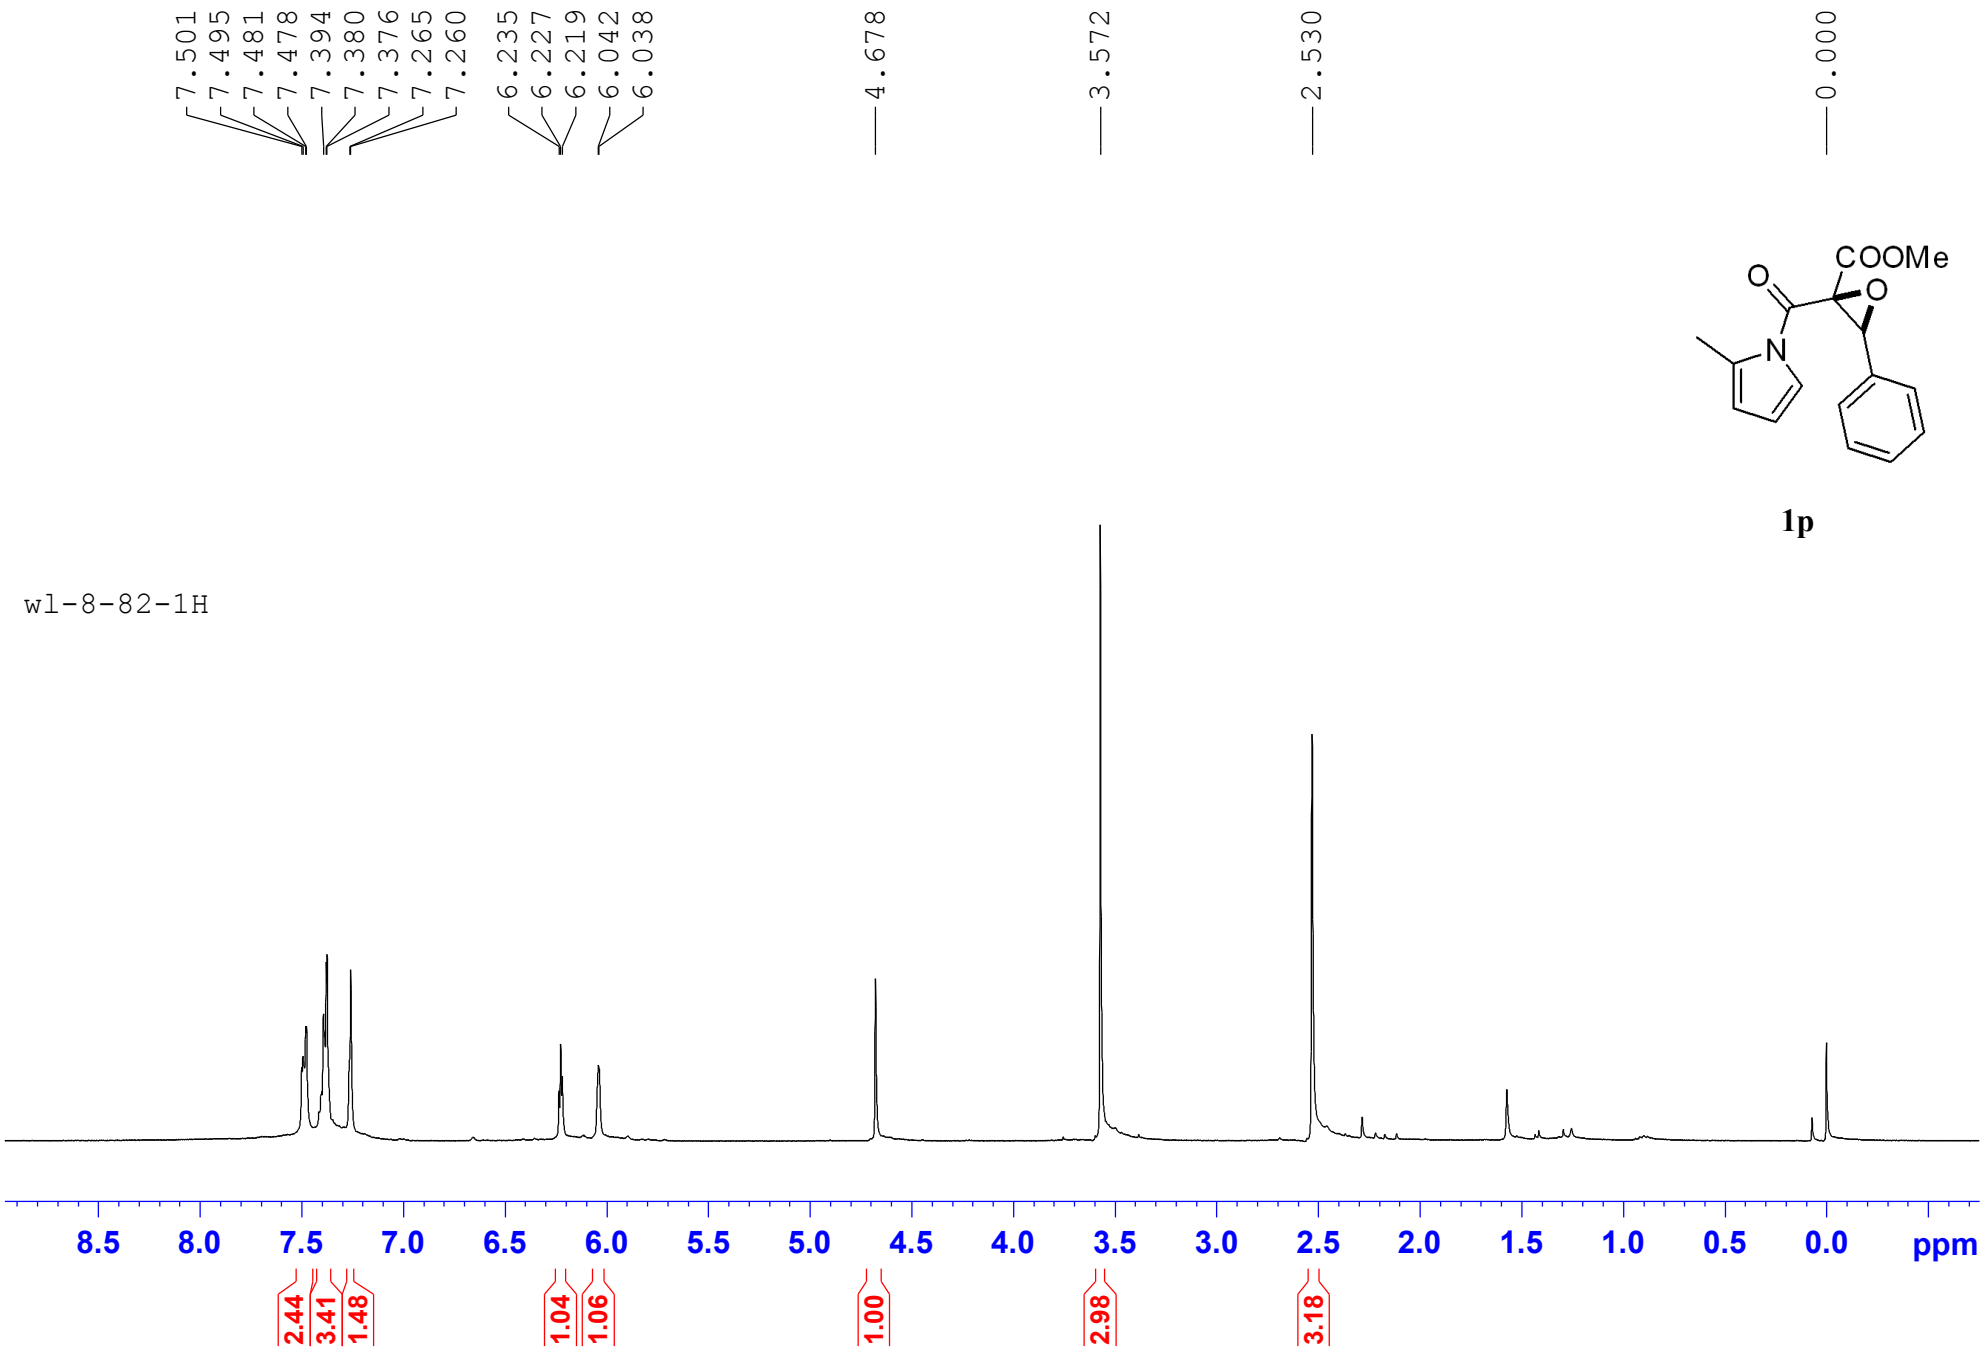

w1-8-82-1H

1p

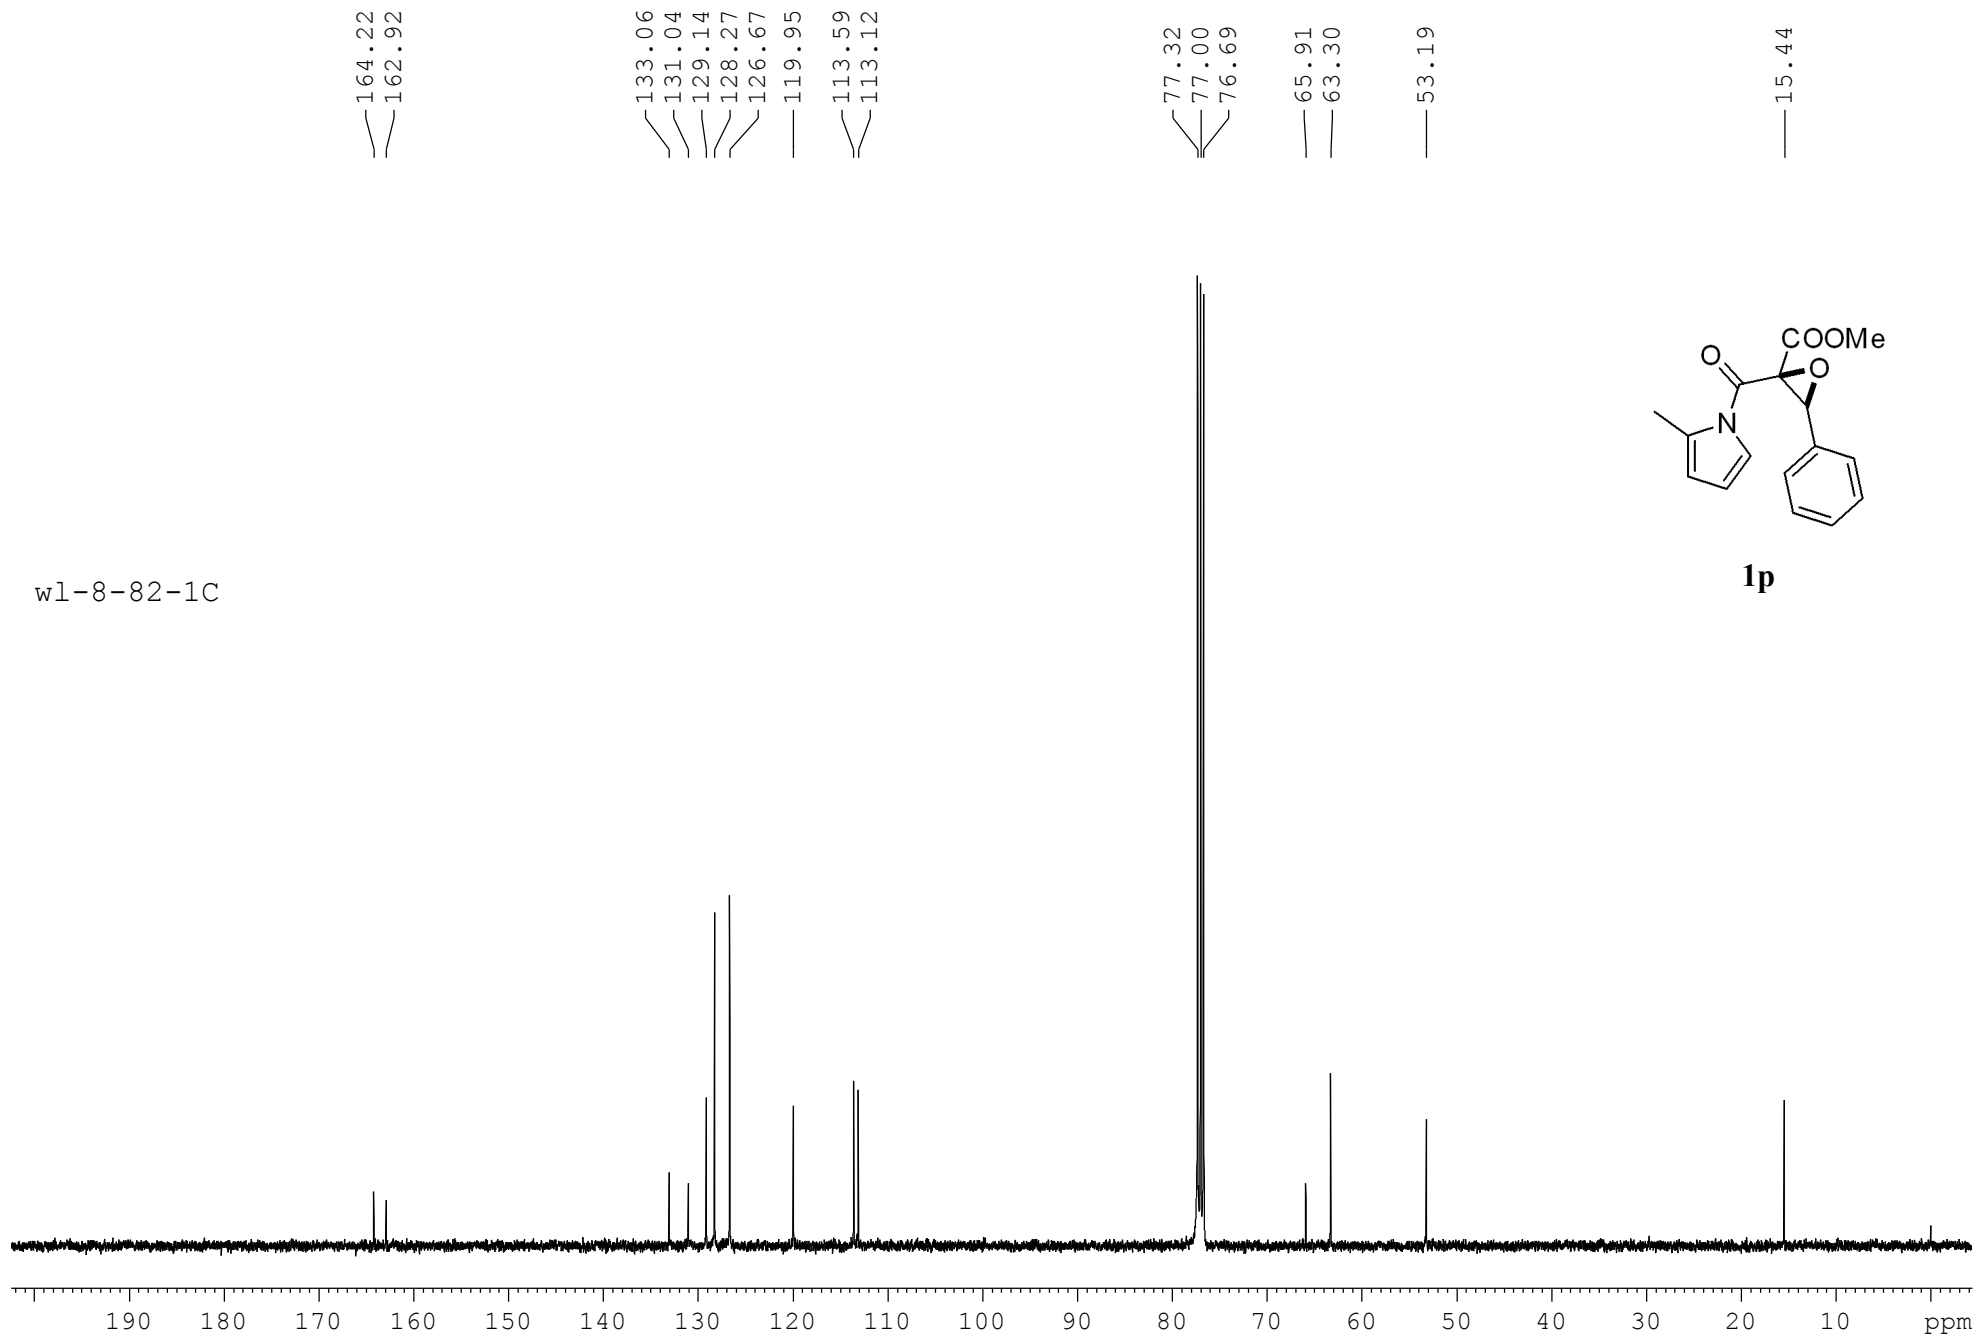



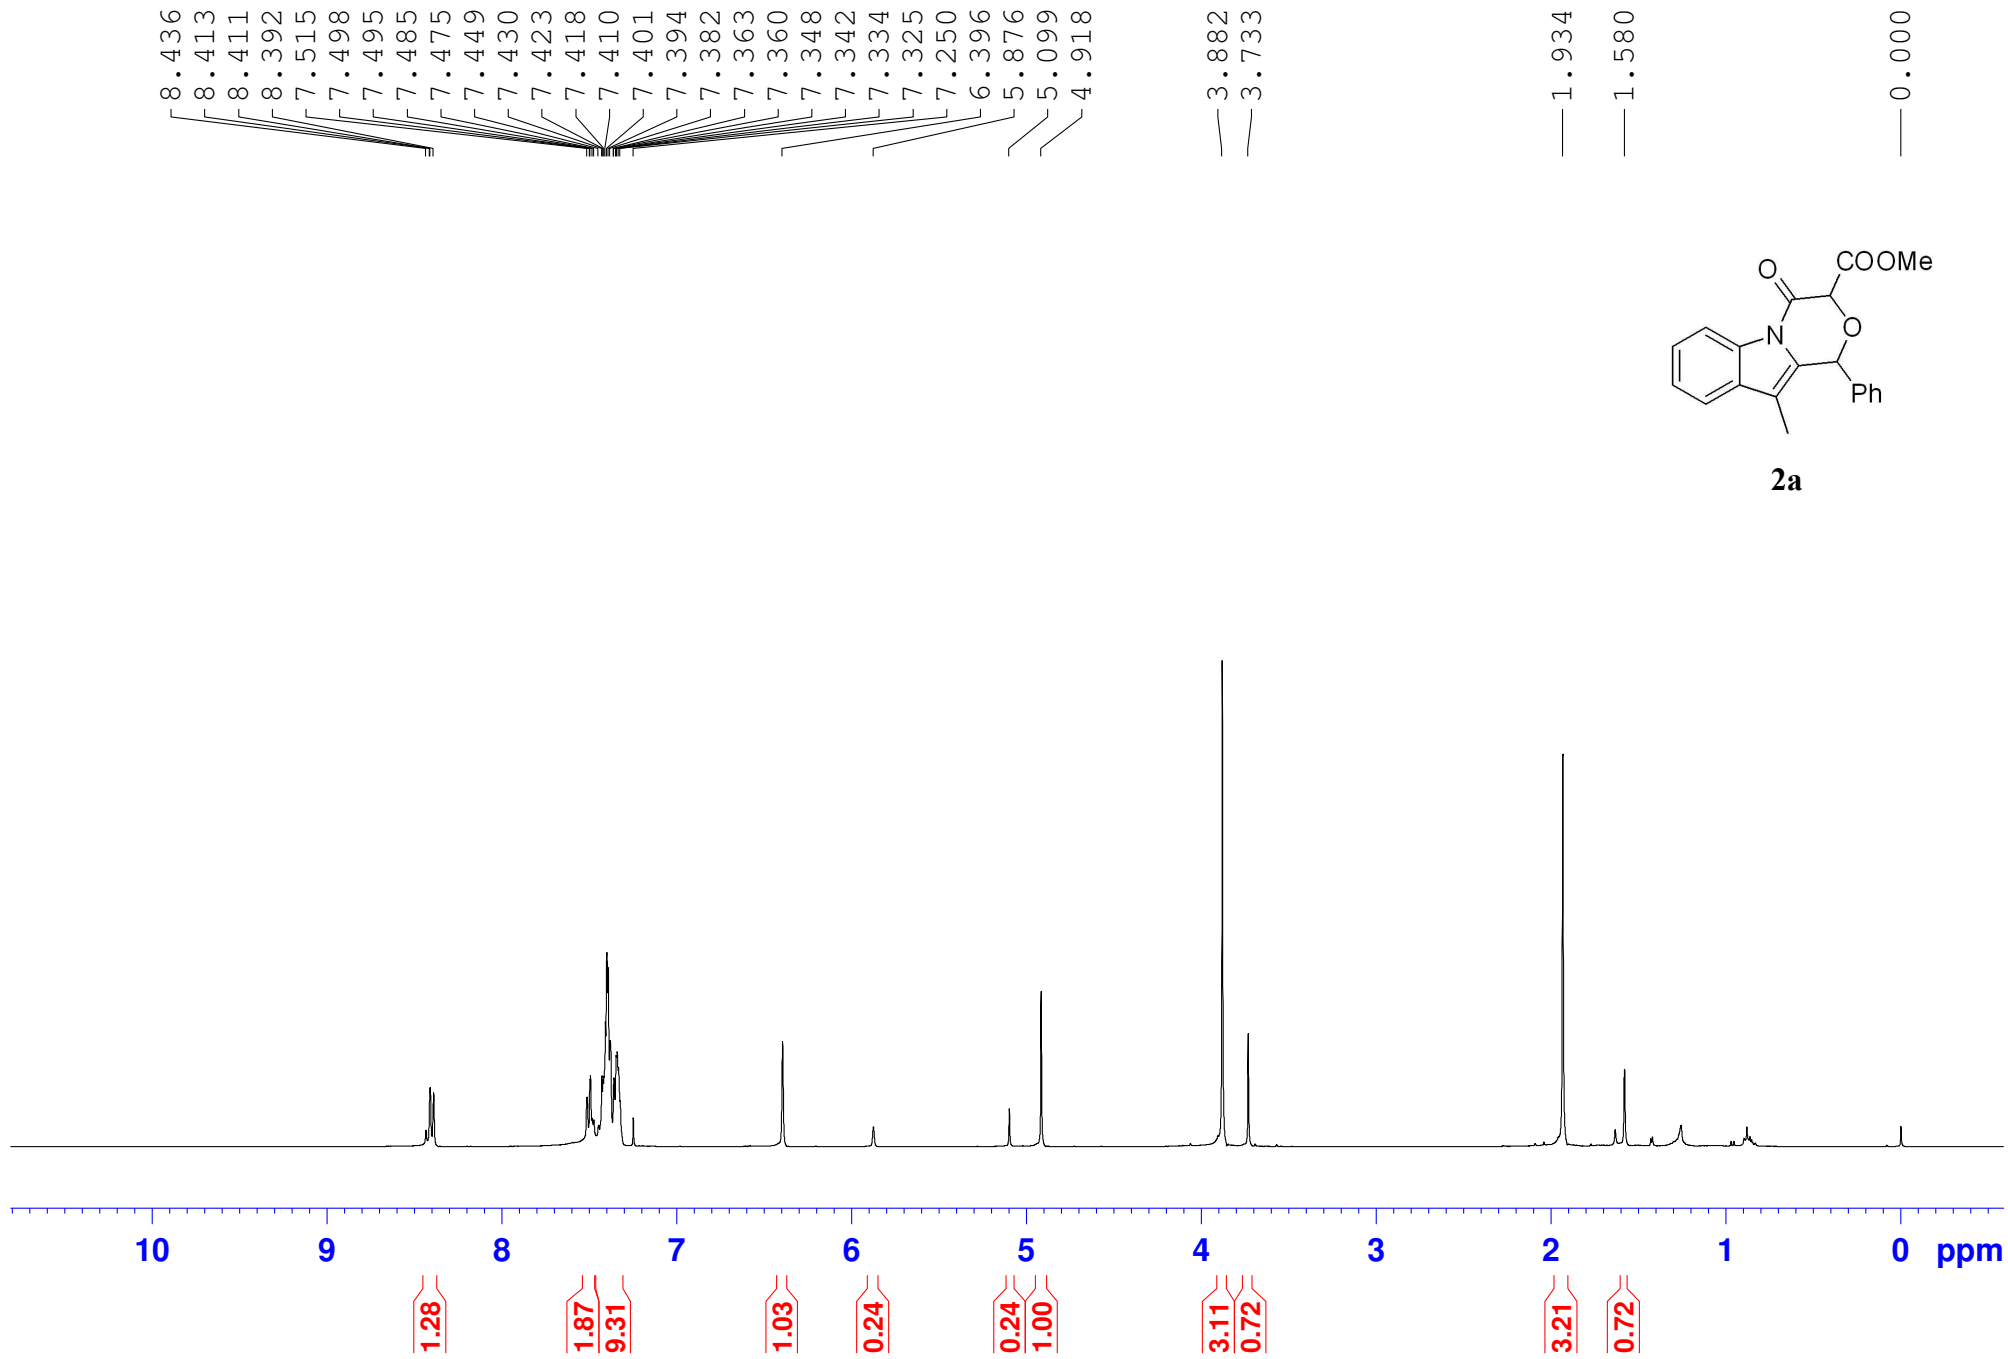

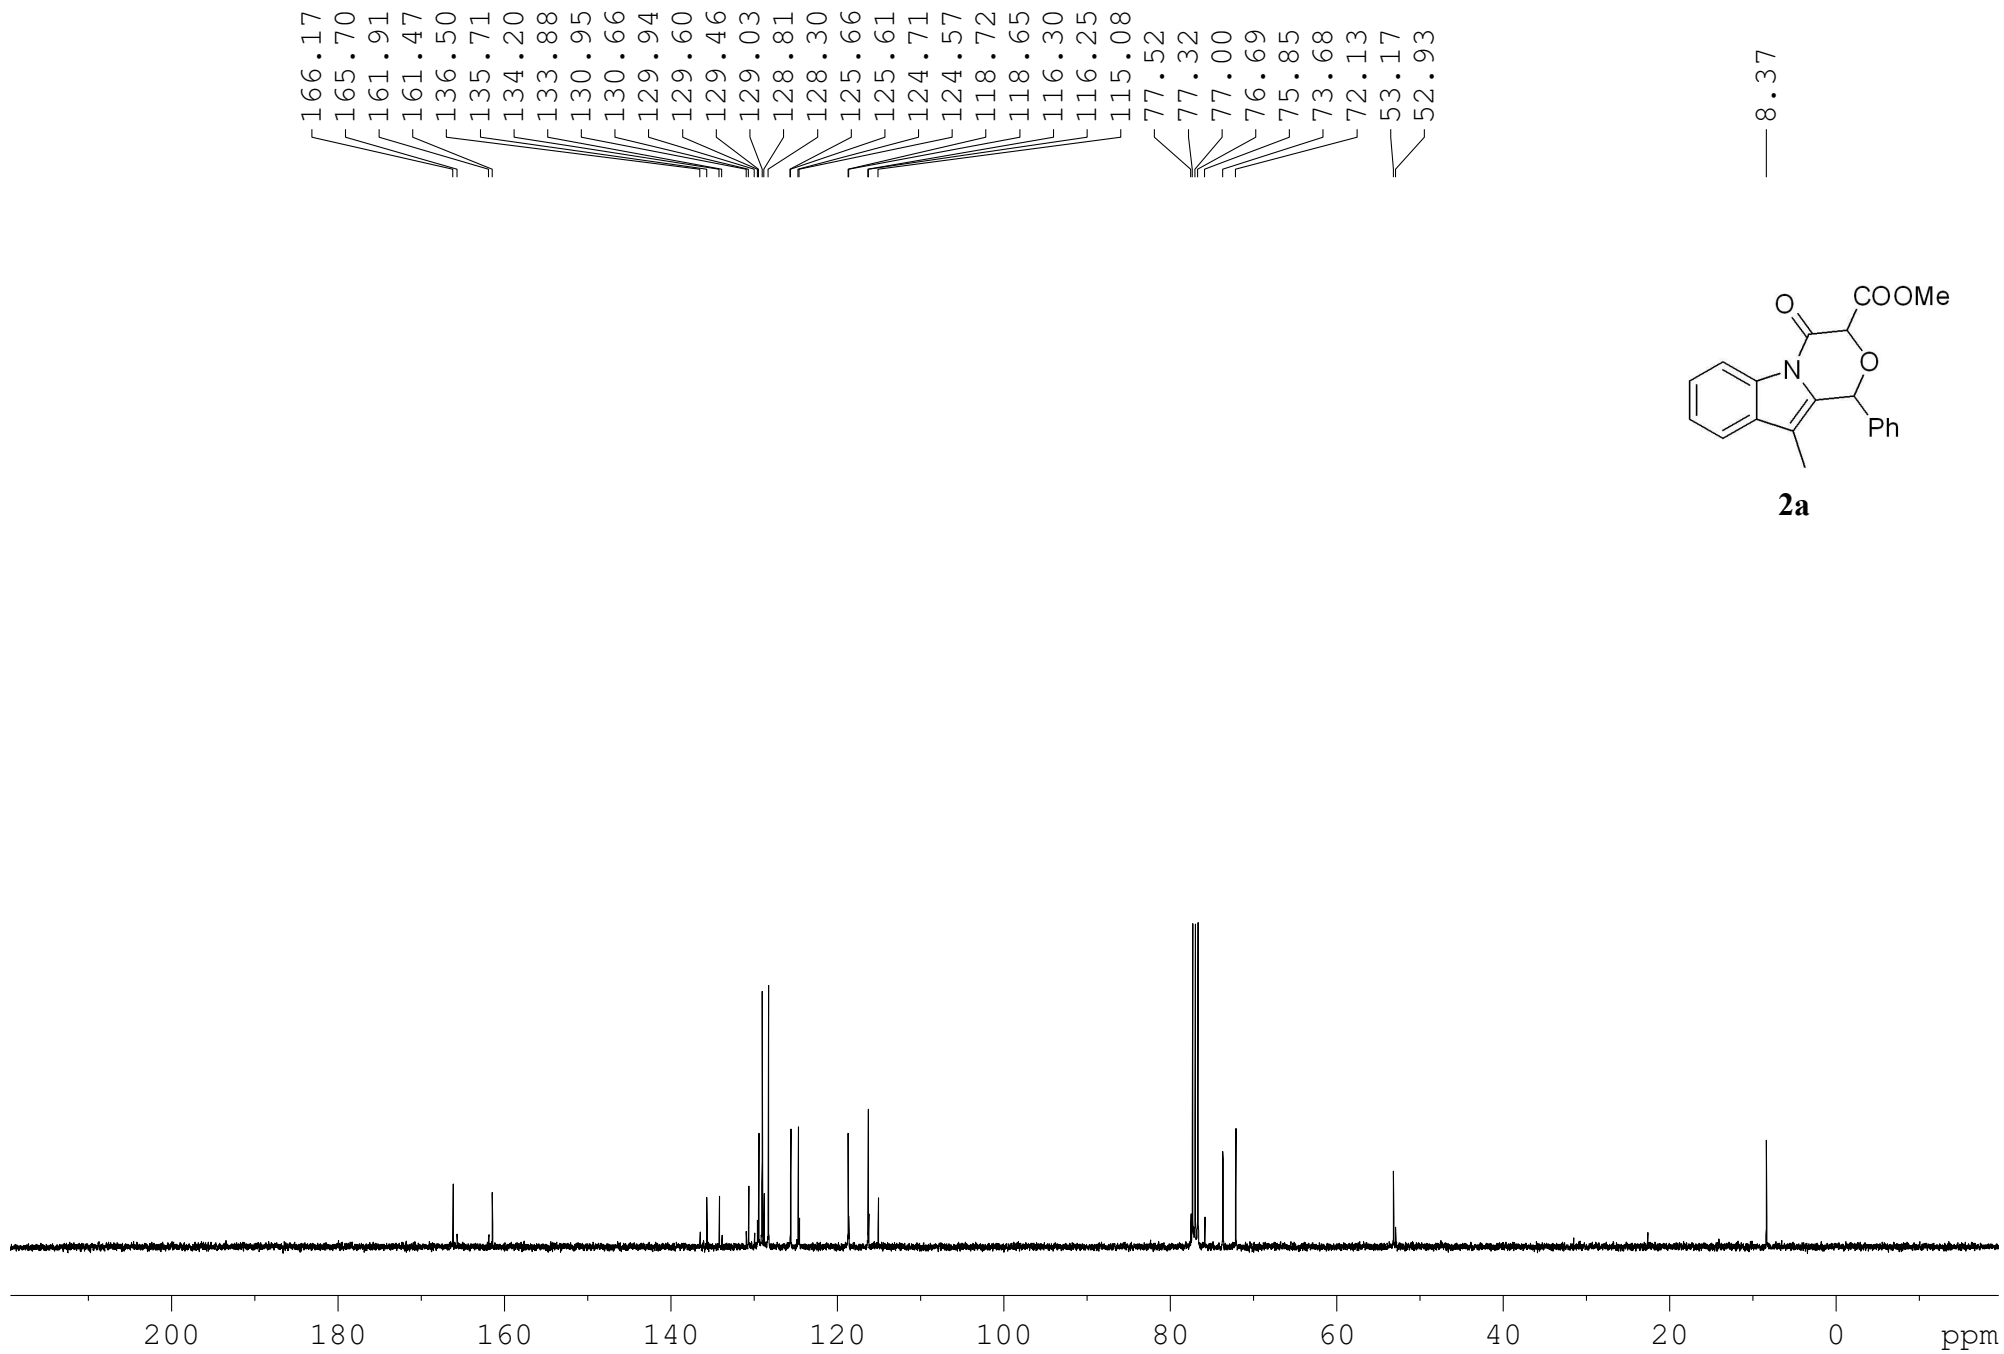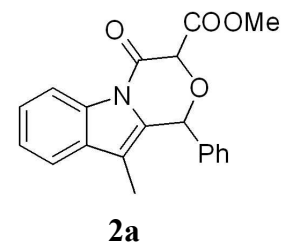

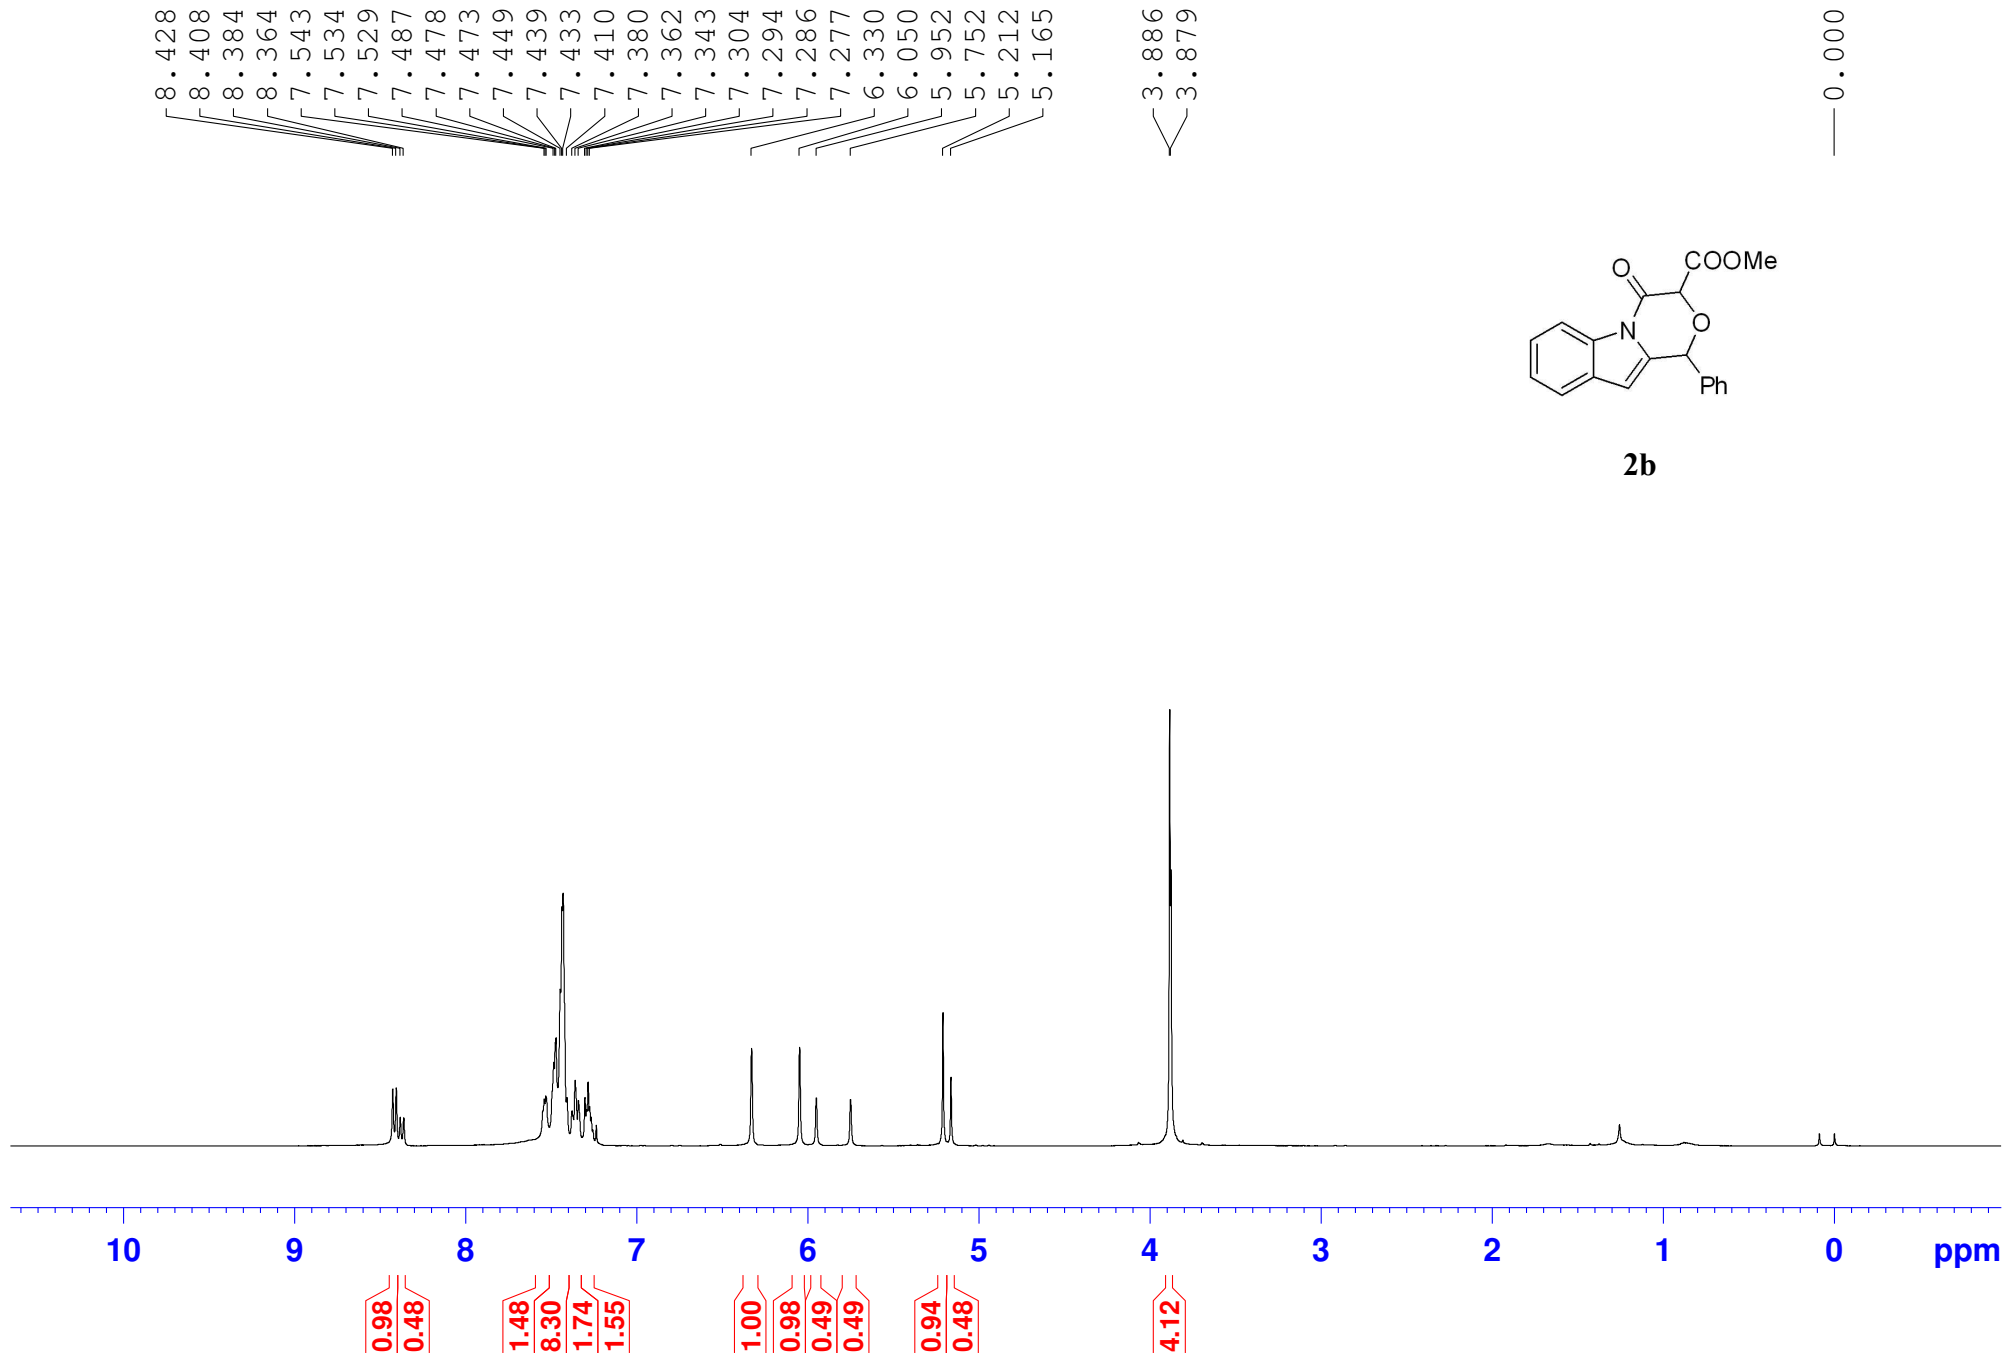

166.49  
165.27  
162.16  
161.31  
137.02  
136.40  
136.17  
136.13  
134.71  
134.59  
129.48  
129.37  
128.96  
128.85  
128.75  
128.71  
128.12  
128.09  
125.47  
125.42  
124.89  
124.81  
120.77  
116.18  
116.07  
107.13  
107.09  
78.64  
77.32  
77.00  
76.68  
75.83  
75.77  
72.31  
53.25  
53.12

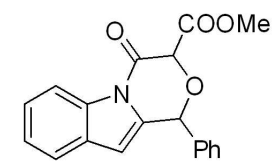

**2b**

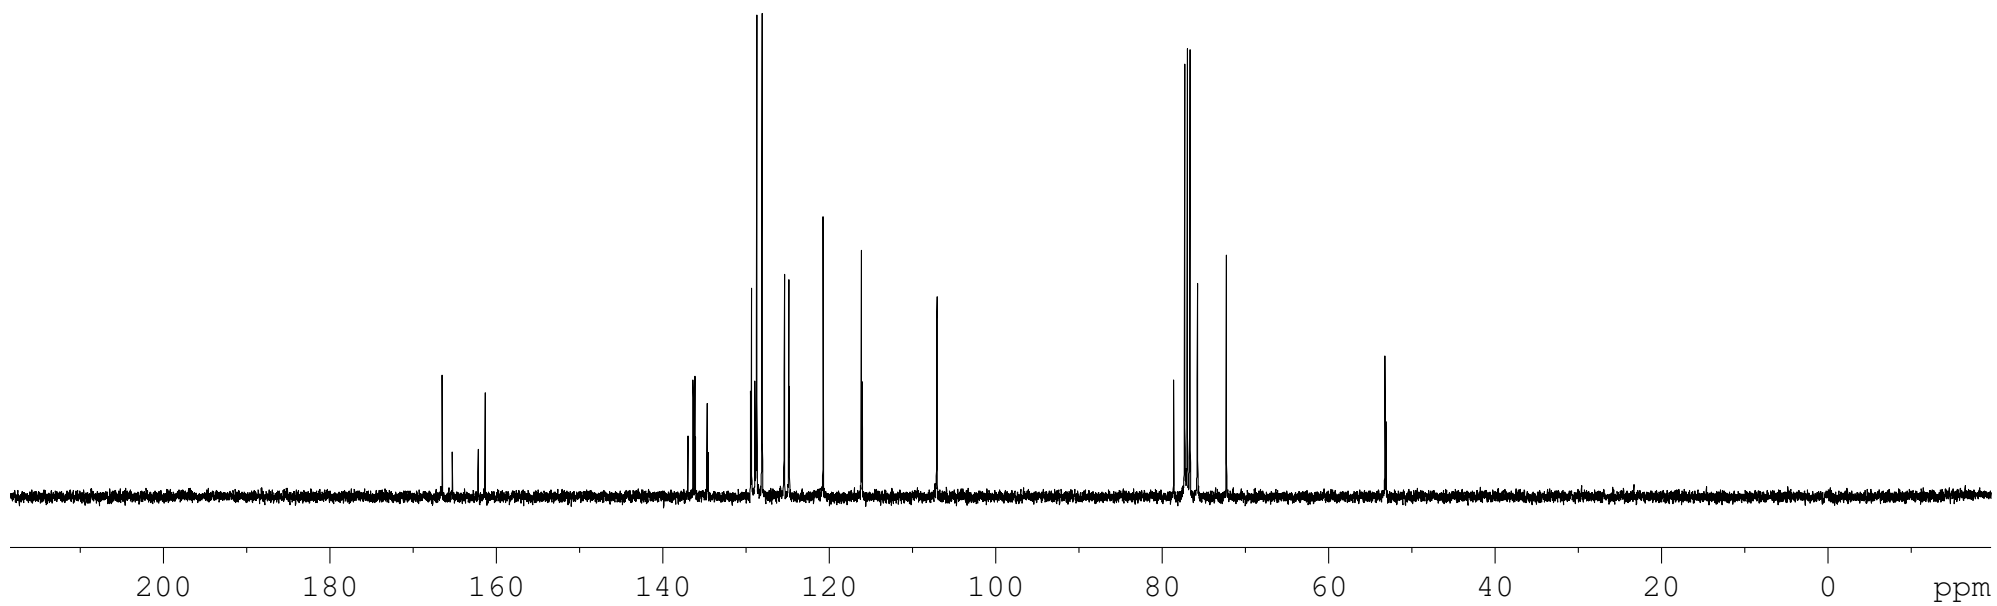

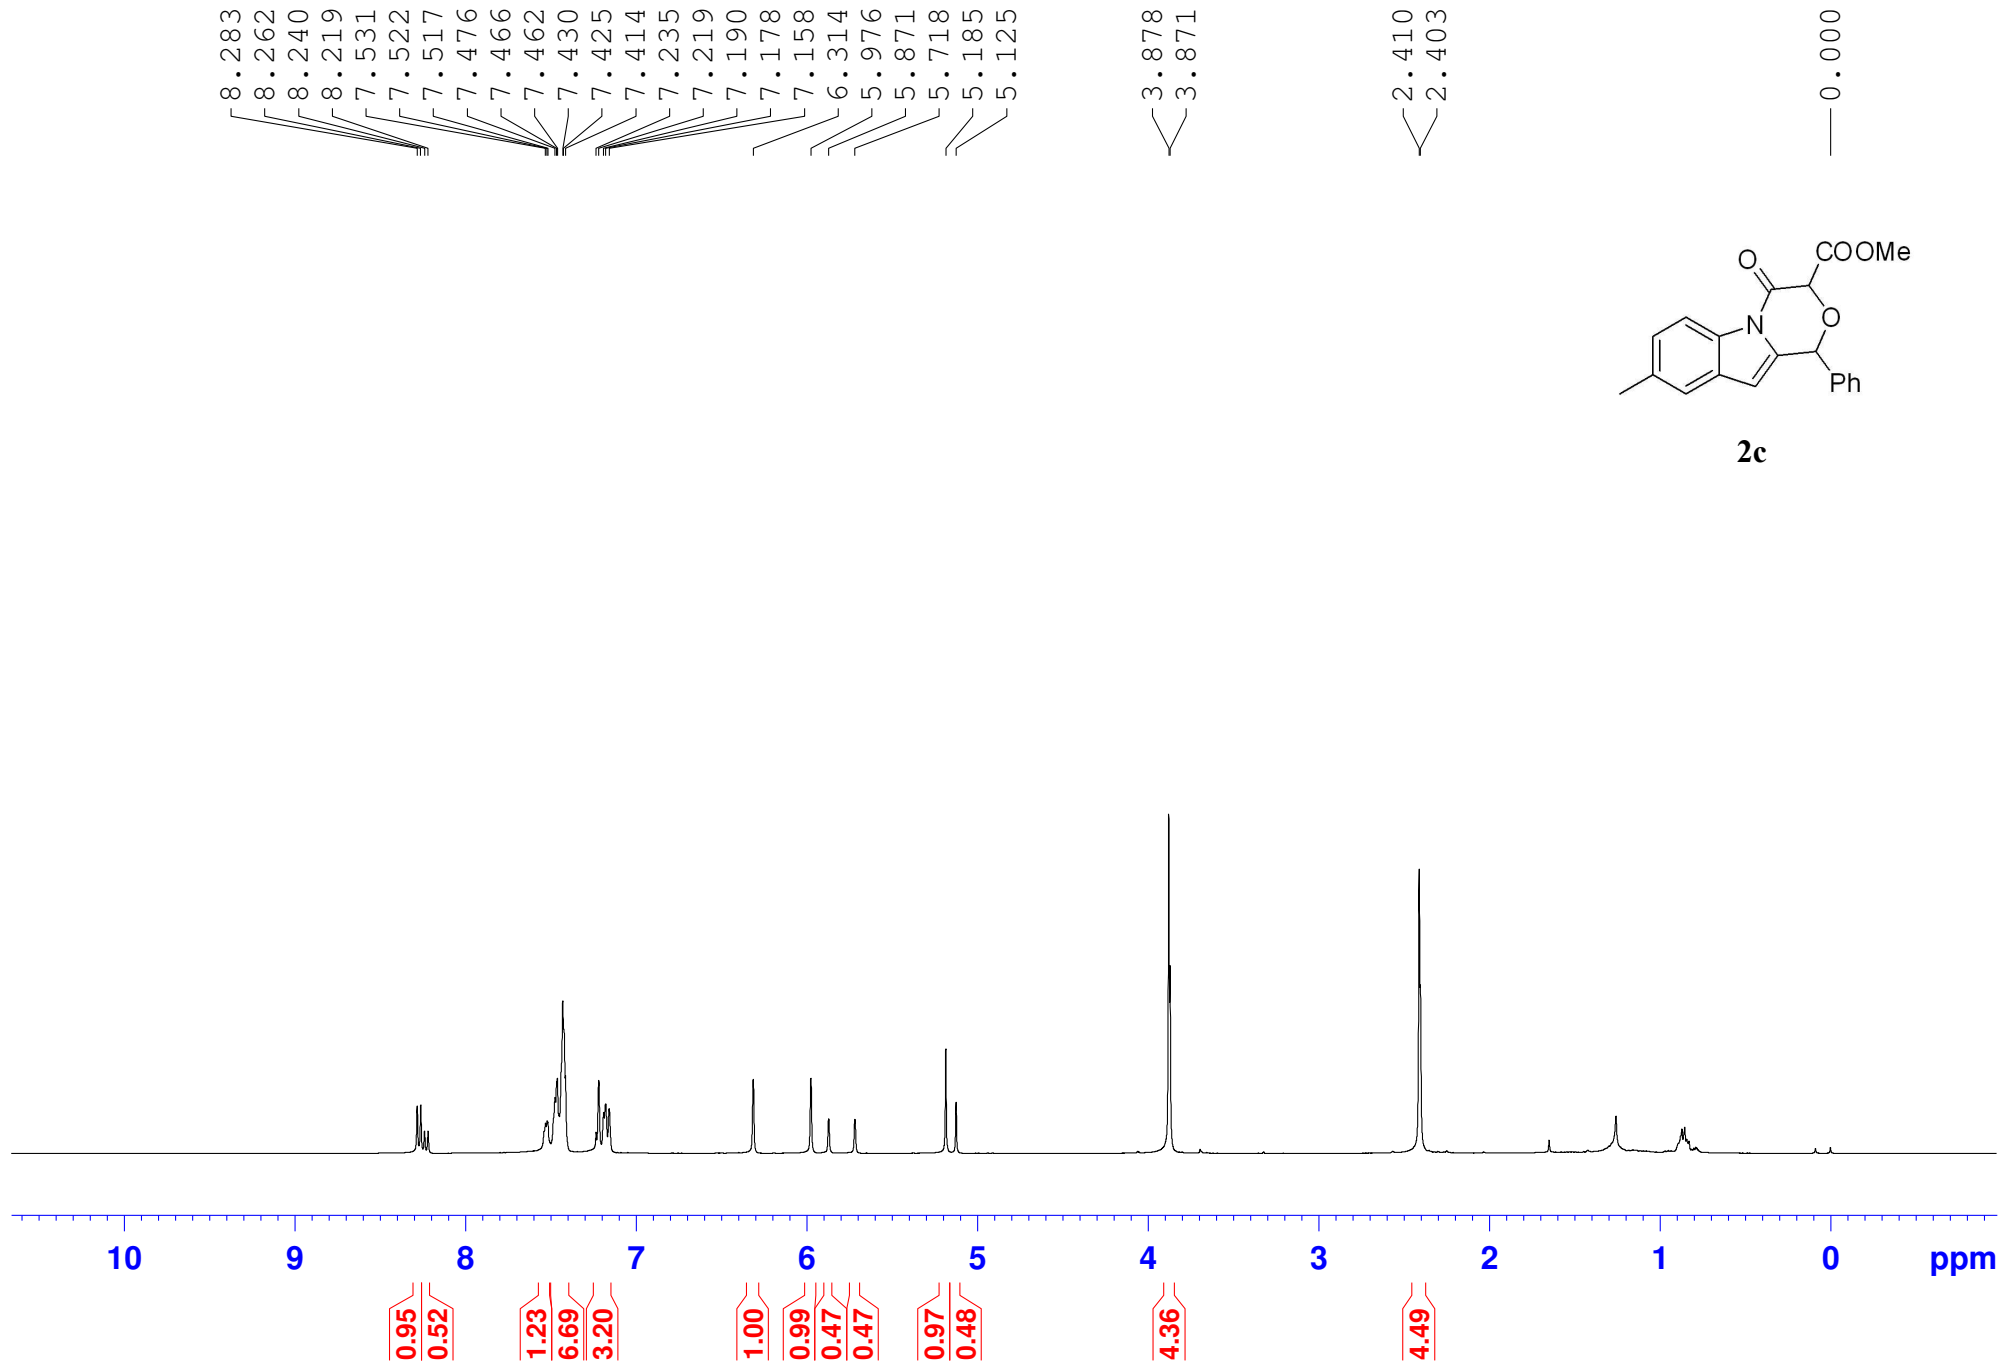

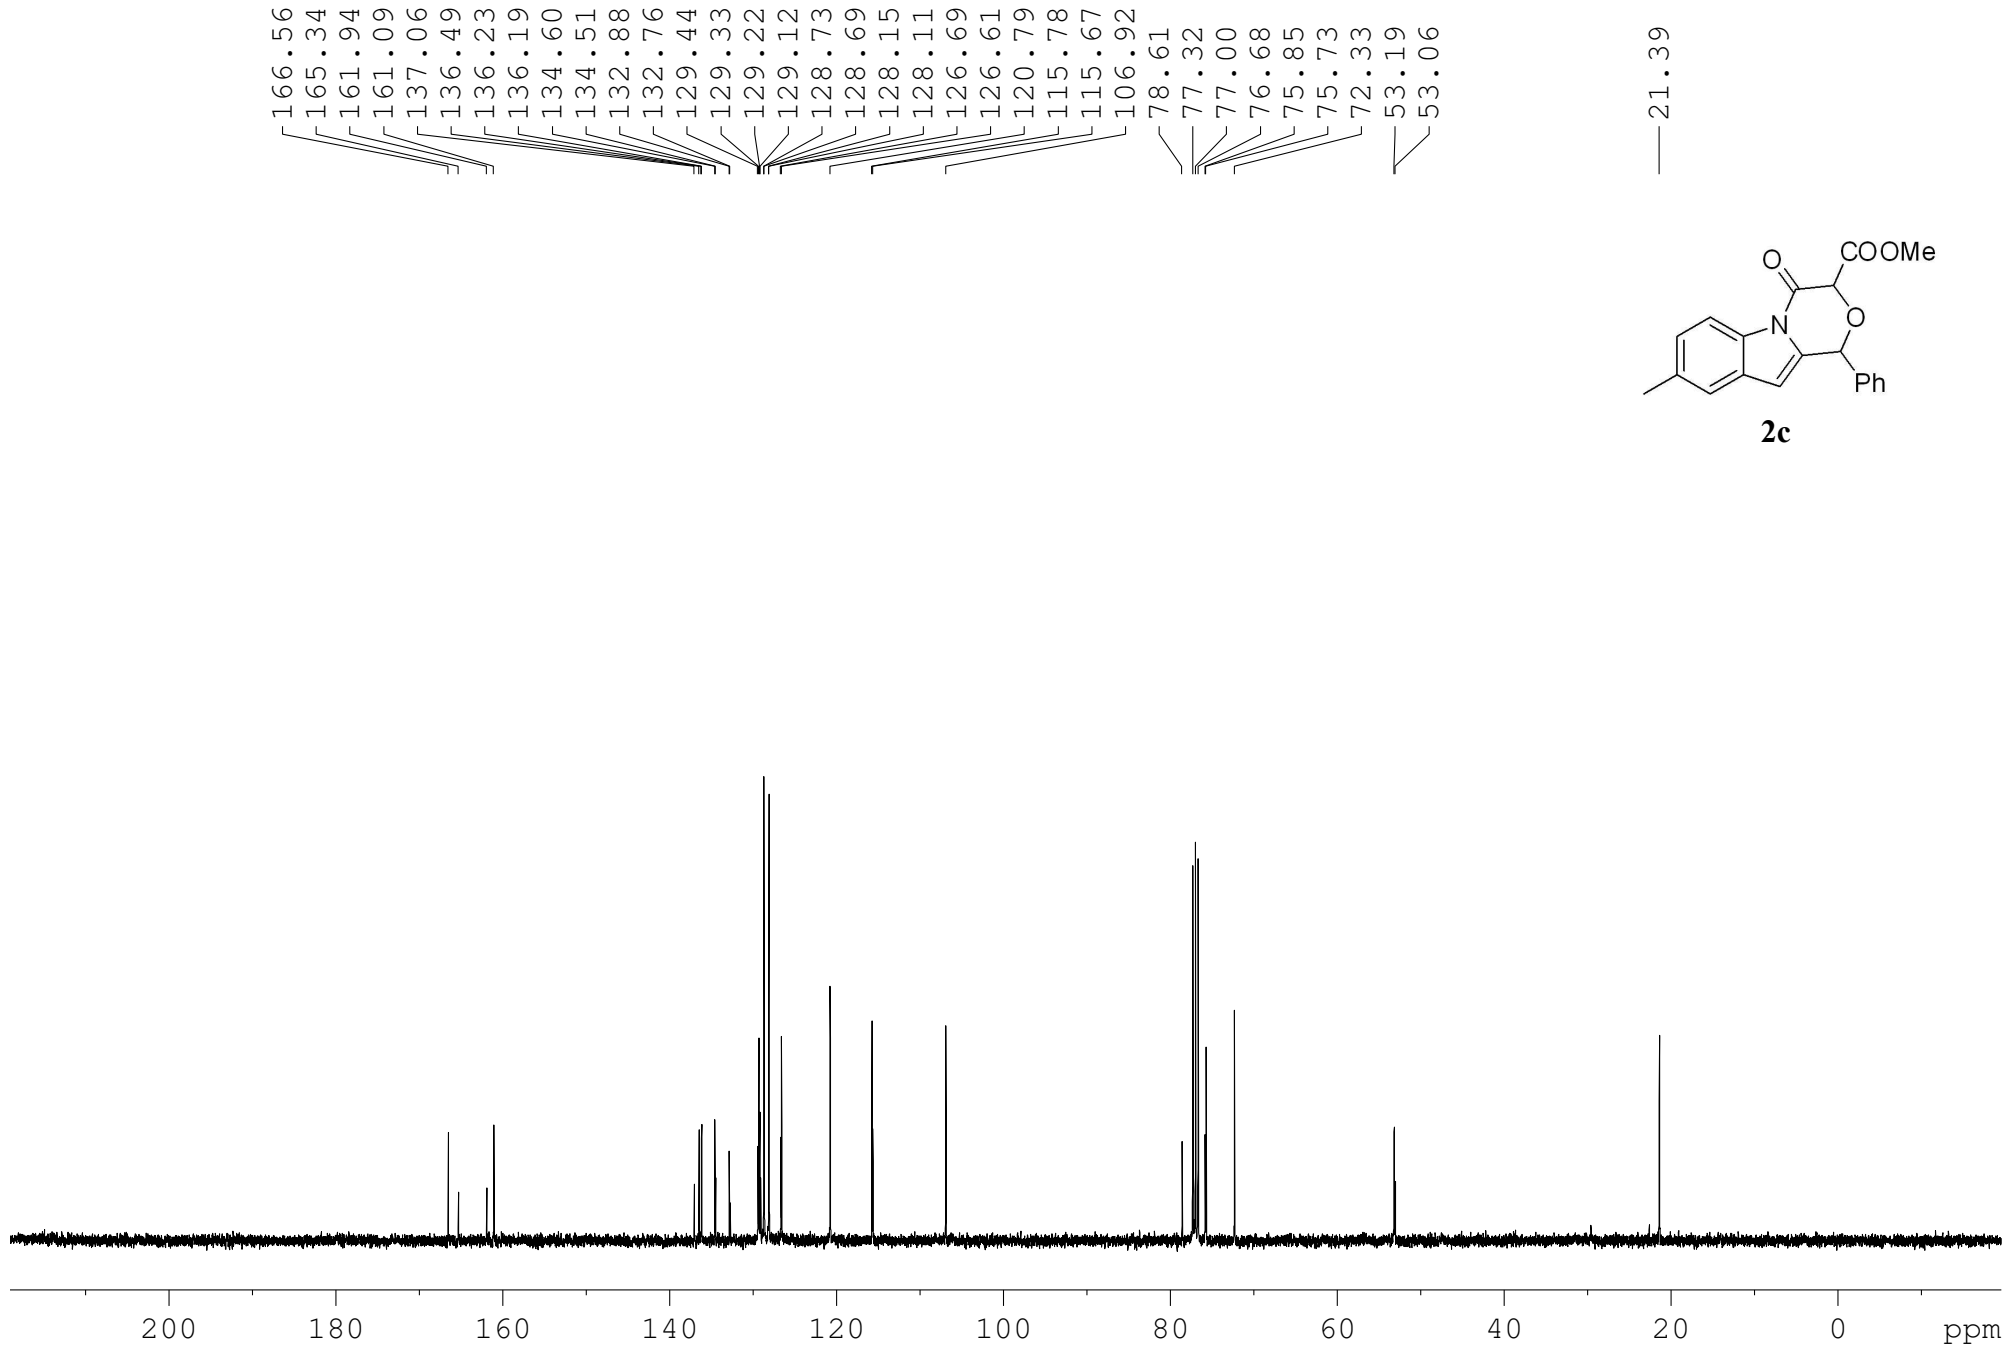

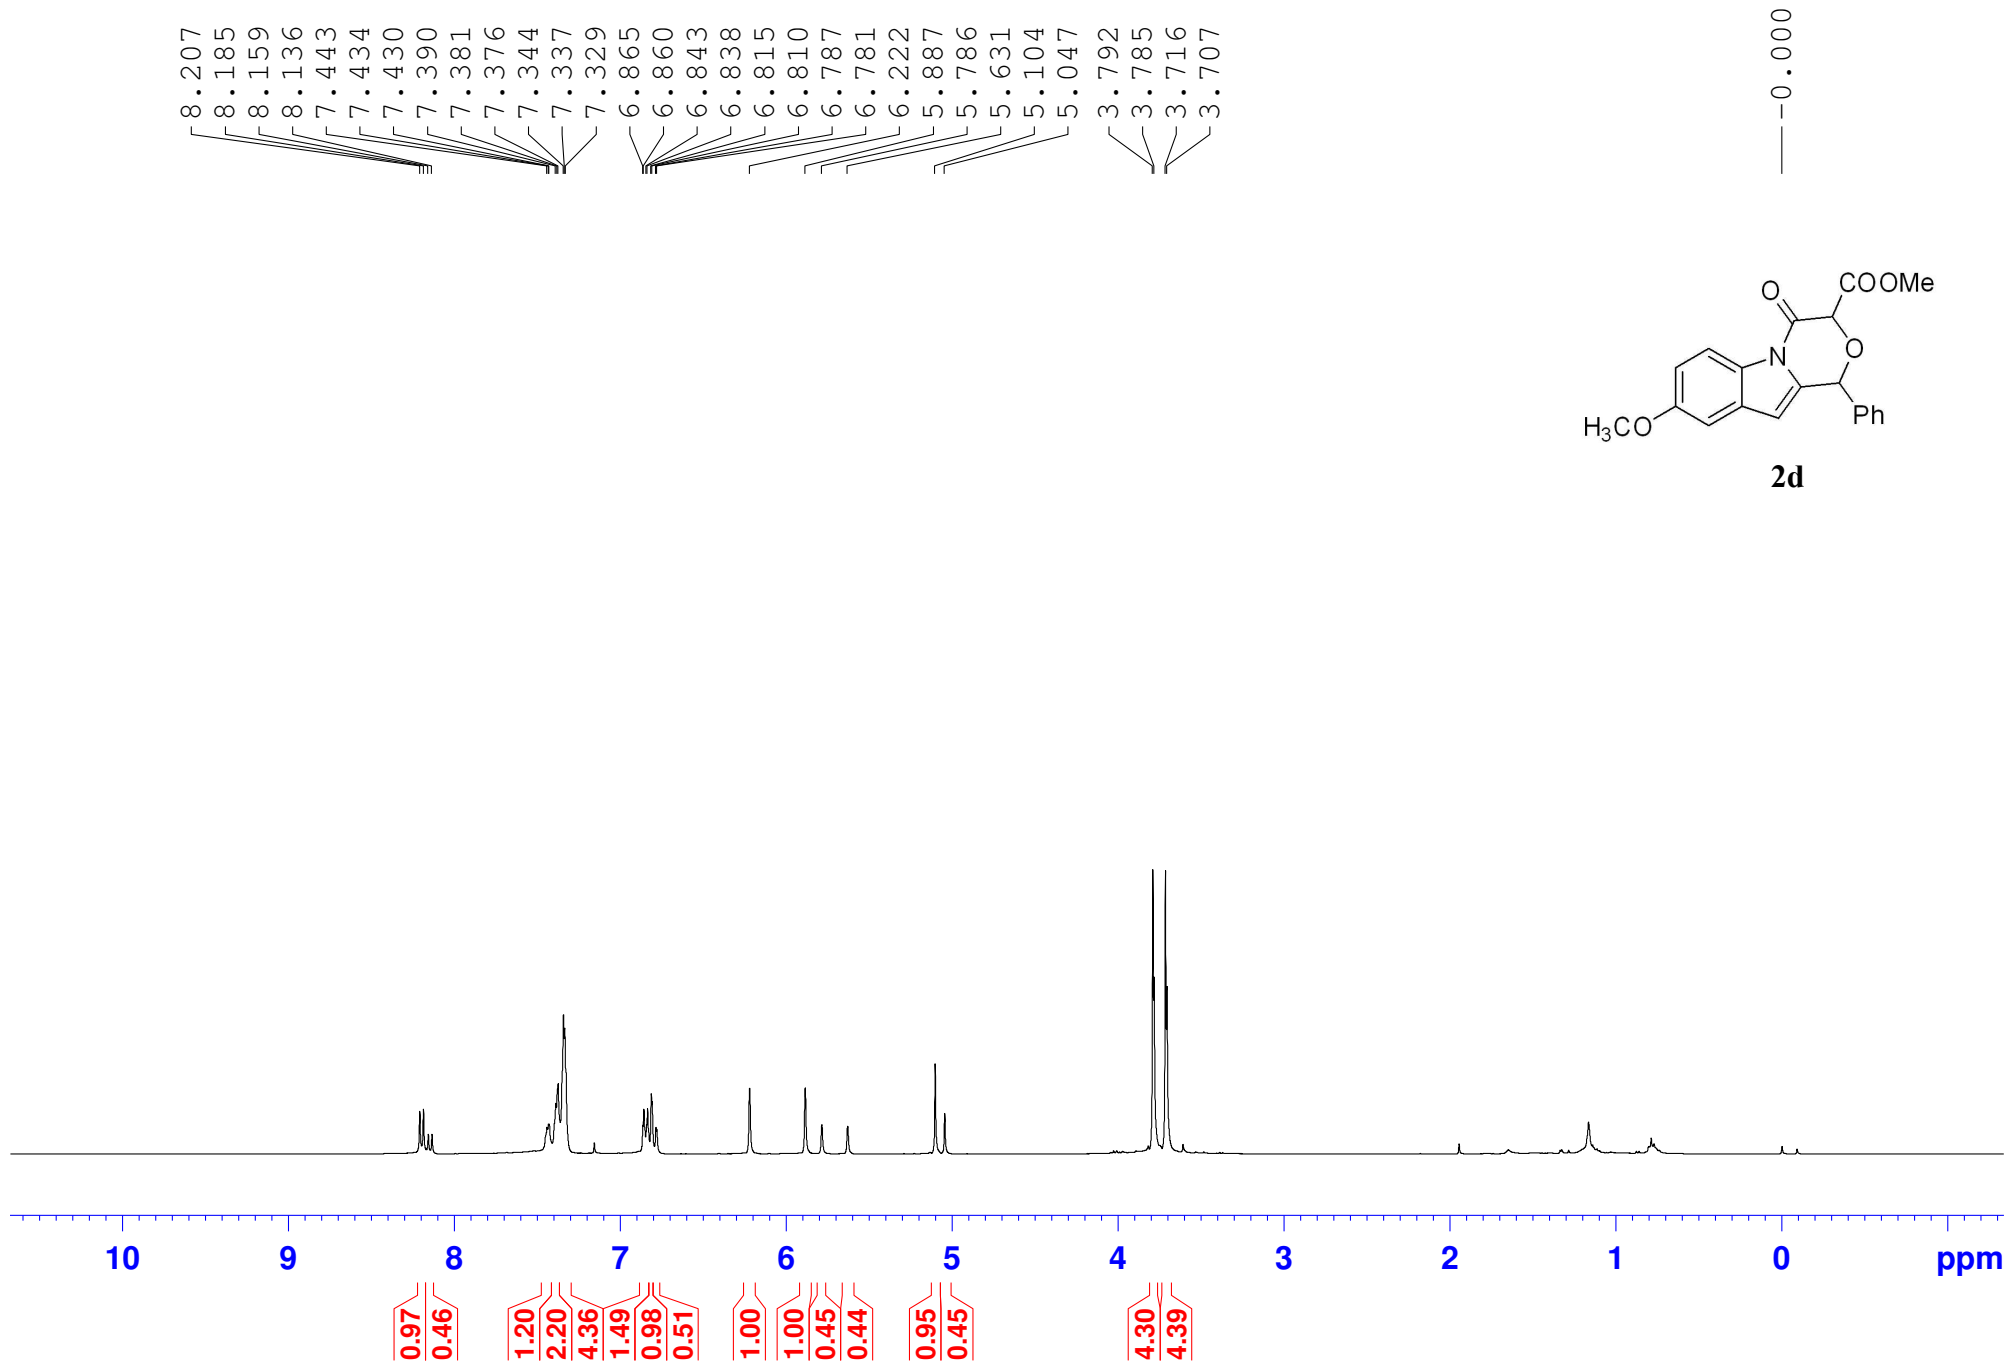

166.52  
165.33  
161.70  
160.83  
157.28  
157.21  
137.74  
136.90  
136.38  
136.11  
130.11  
130.00  
129.44  
129.34  
129.19  
129.07  
128.72  
128.68  
128.10  
128.06  
116.86  
116.75  
113.30  
113.21  
106.99  
103.94  
78.50  
77.32  
77.00  
76.68  
75.74  
75.65  
72.23  
55.52  
53.22  
53.09

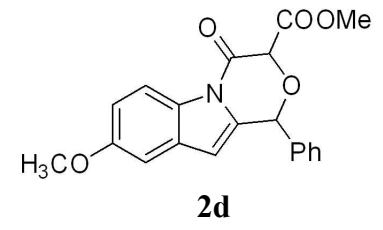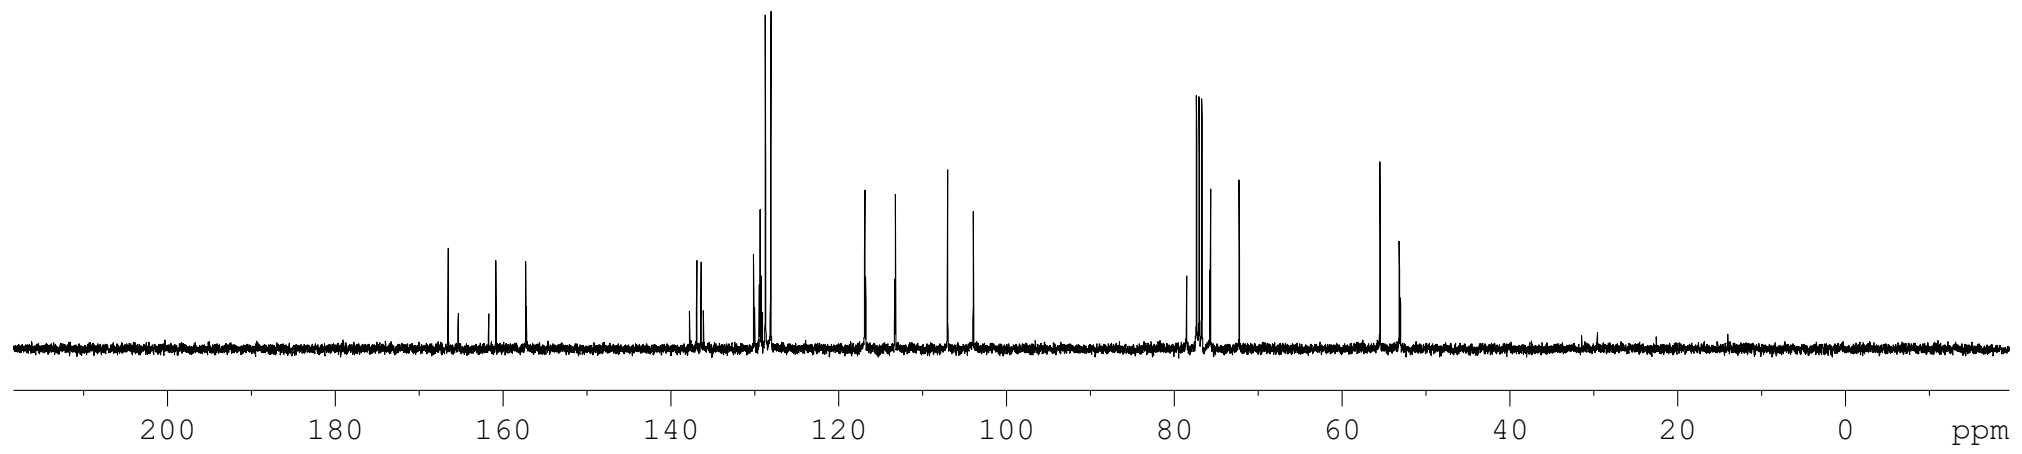



8.210  
8.188  
8.165  
8.143  
7.491  
7.488  
7.465  
7.453  
7.447  
7.385  
7.374

6.245  
5.913  
5.833  
5.714  
5.138  
5.109

3.823  
3.811

0.000

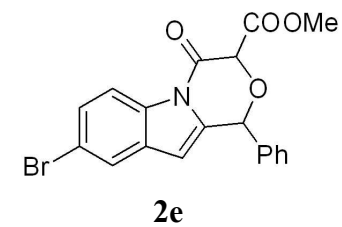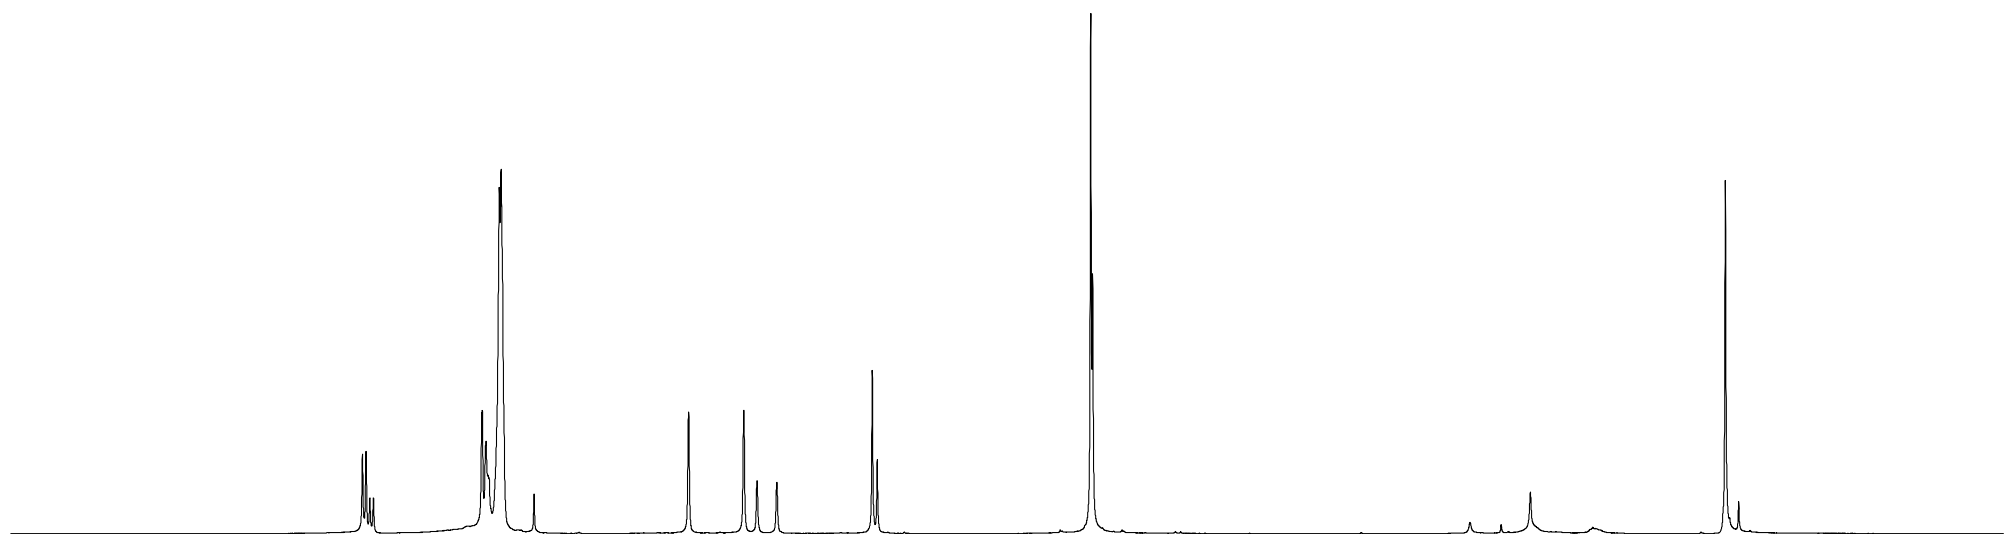

10 9 8 7 6 5 4 3 2 1 0 -1 ppm

0.99  
0.43

2.72  
8.01

1.00  
1.00  
0.46  
0.45

0.92  
0.47

4.21

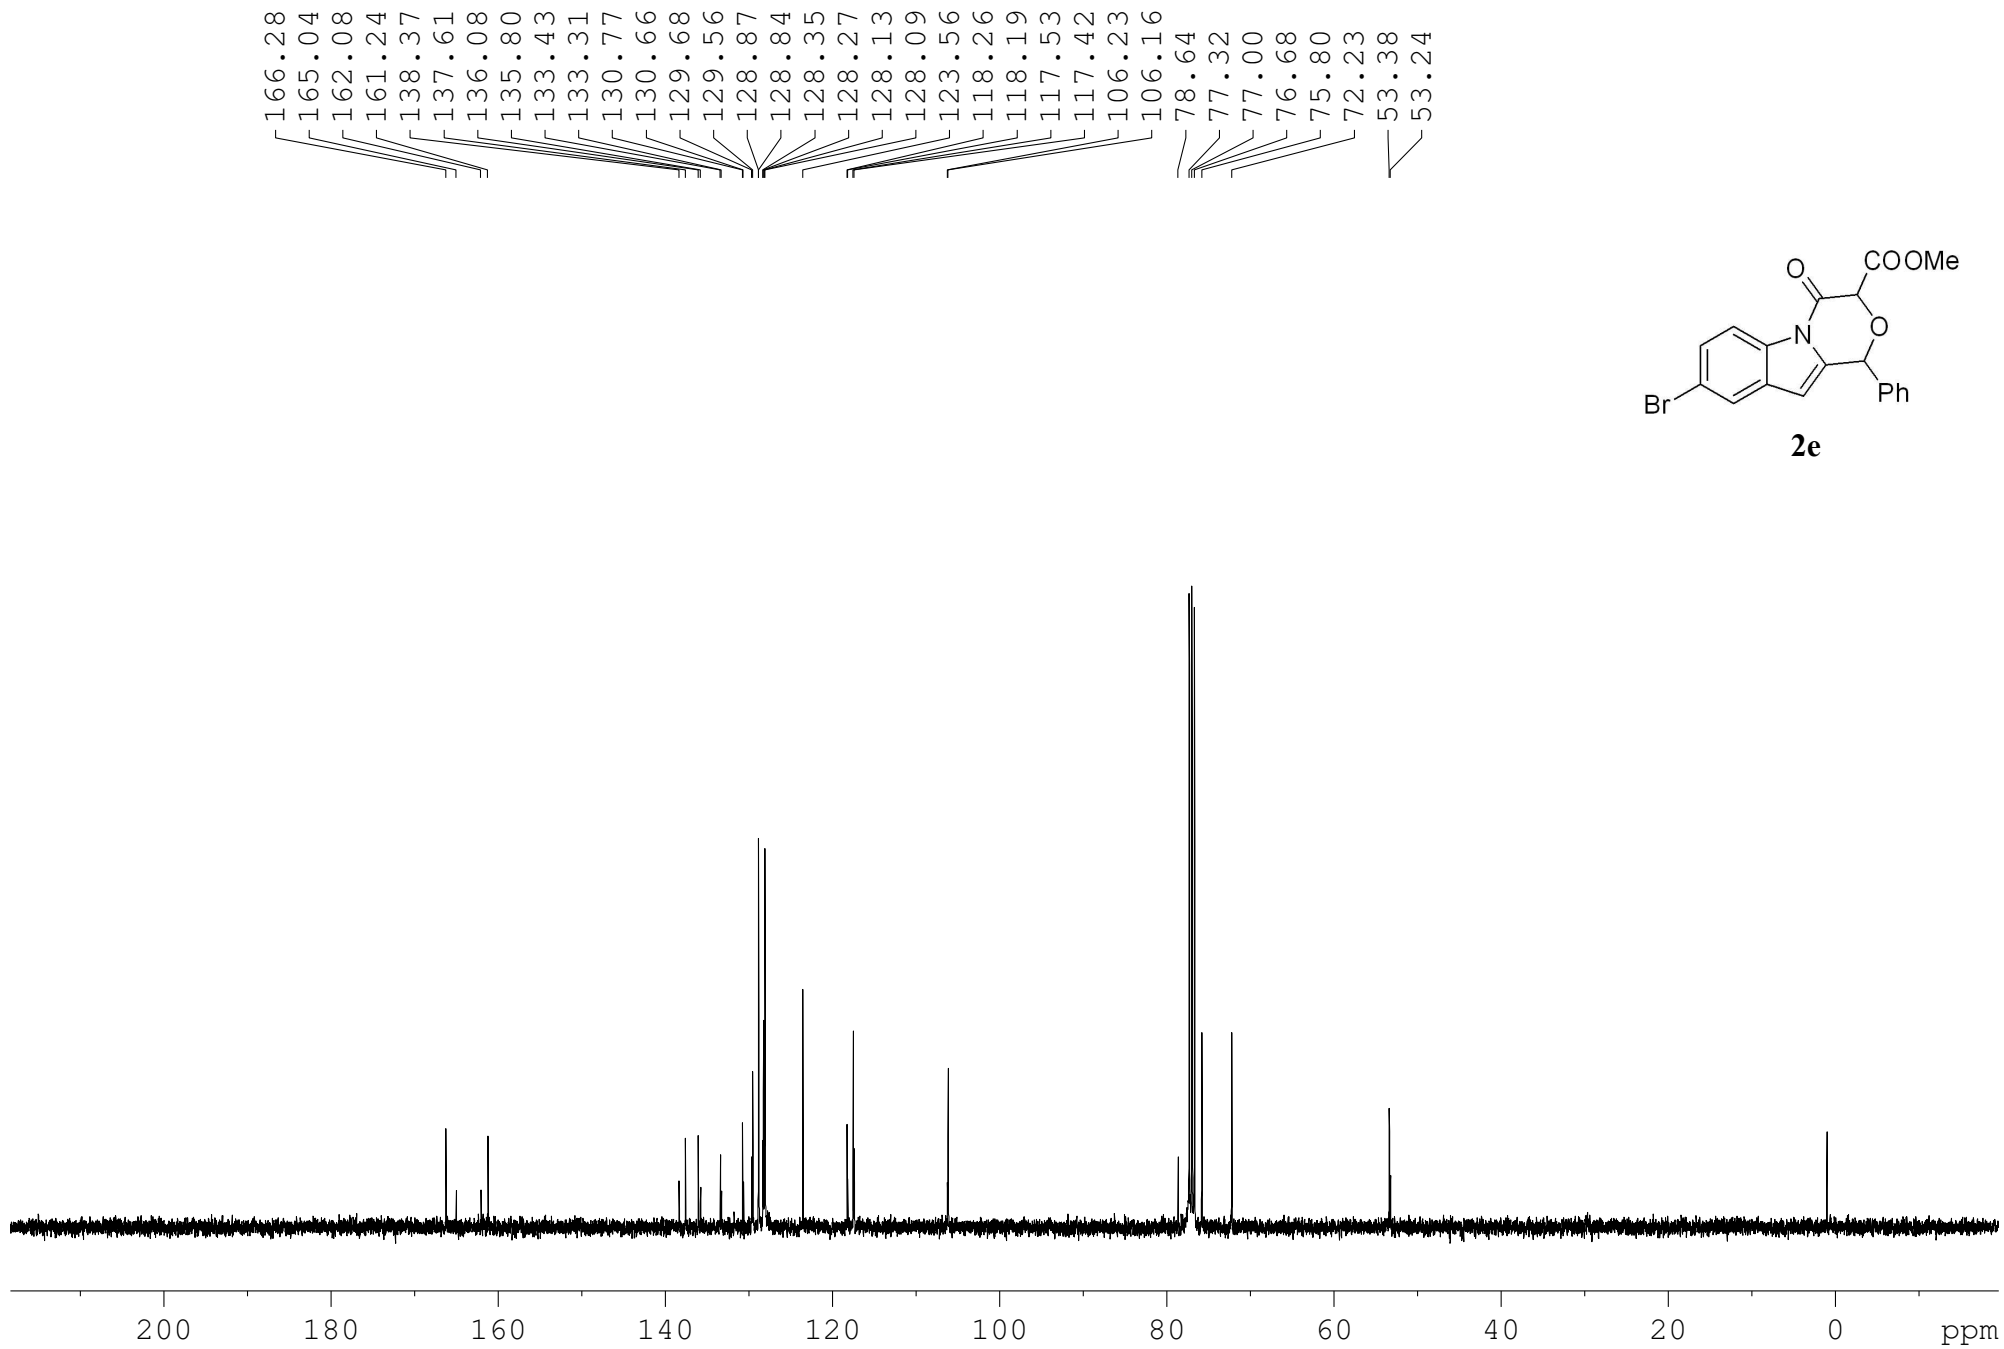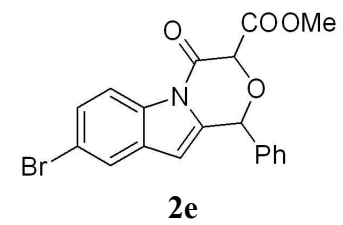

8.410  
8.209  
8.200  
8.195  
8.191  
8.186  
8.178  
8.167  
7.485  
7.478  
7.476  
7.471  
7.469  
7.462  
7.390  
7.385  
7.376  
7.374  
7.365  
7.263  
7.240  
7.235  
7.227  
7.225  
7.216  
7.028  
4.843

3.898  
3.837

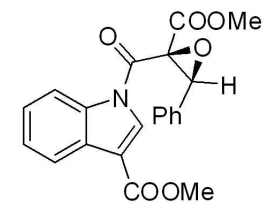

**1f**

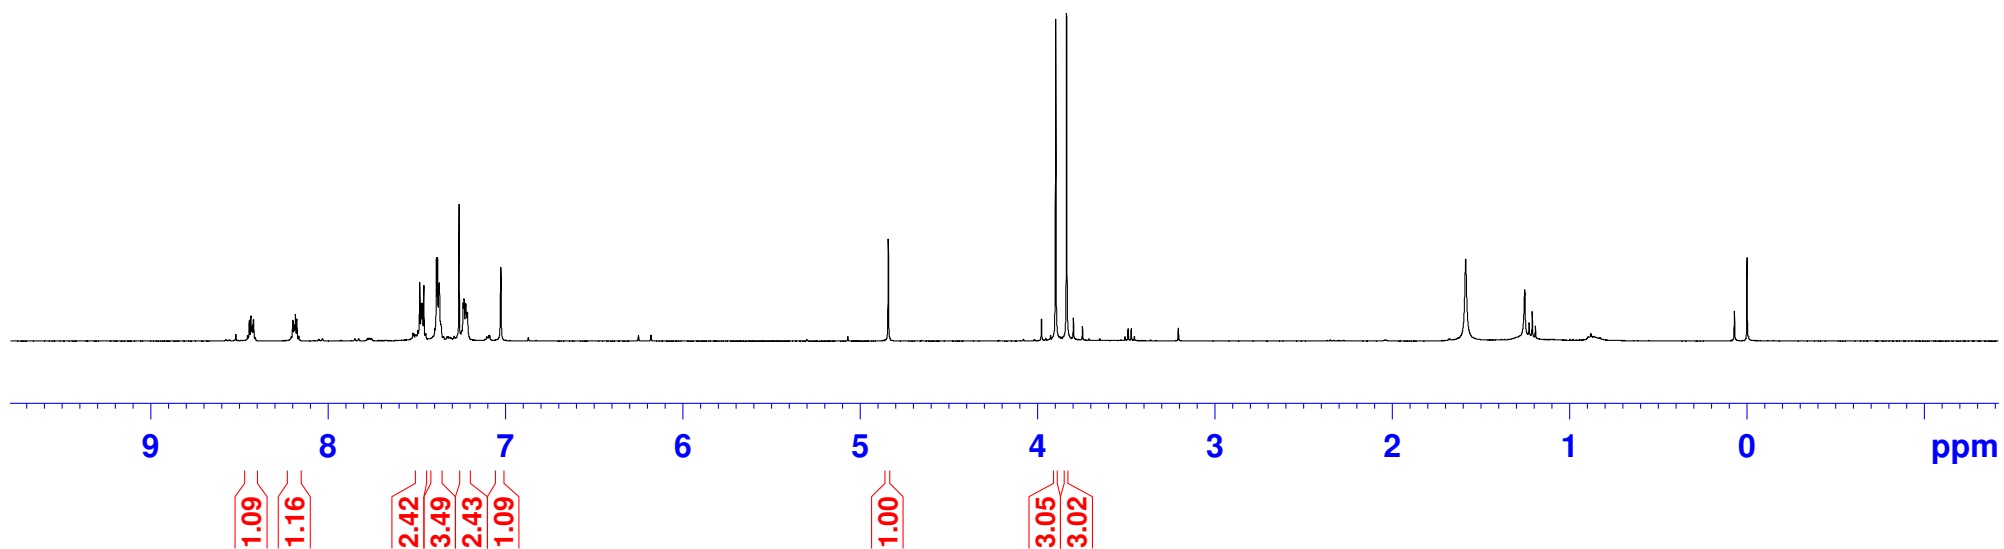

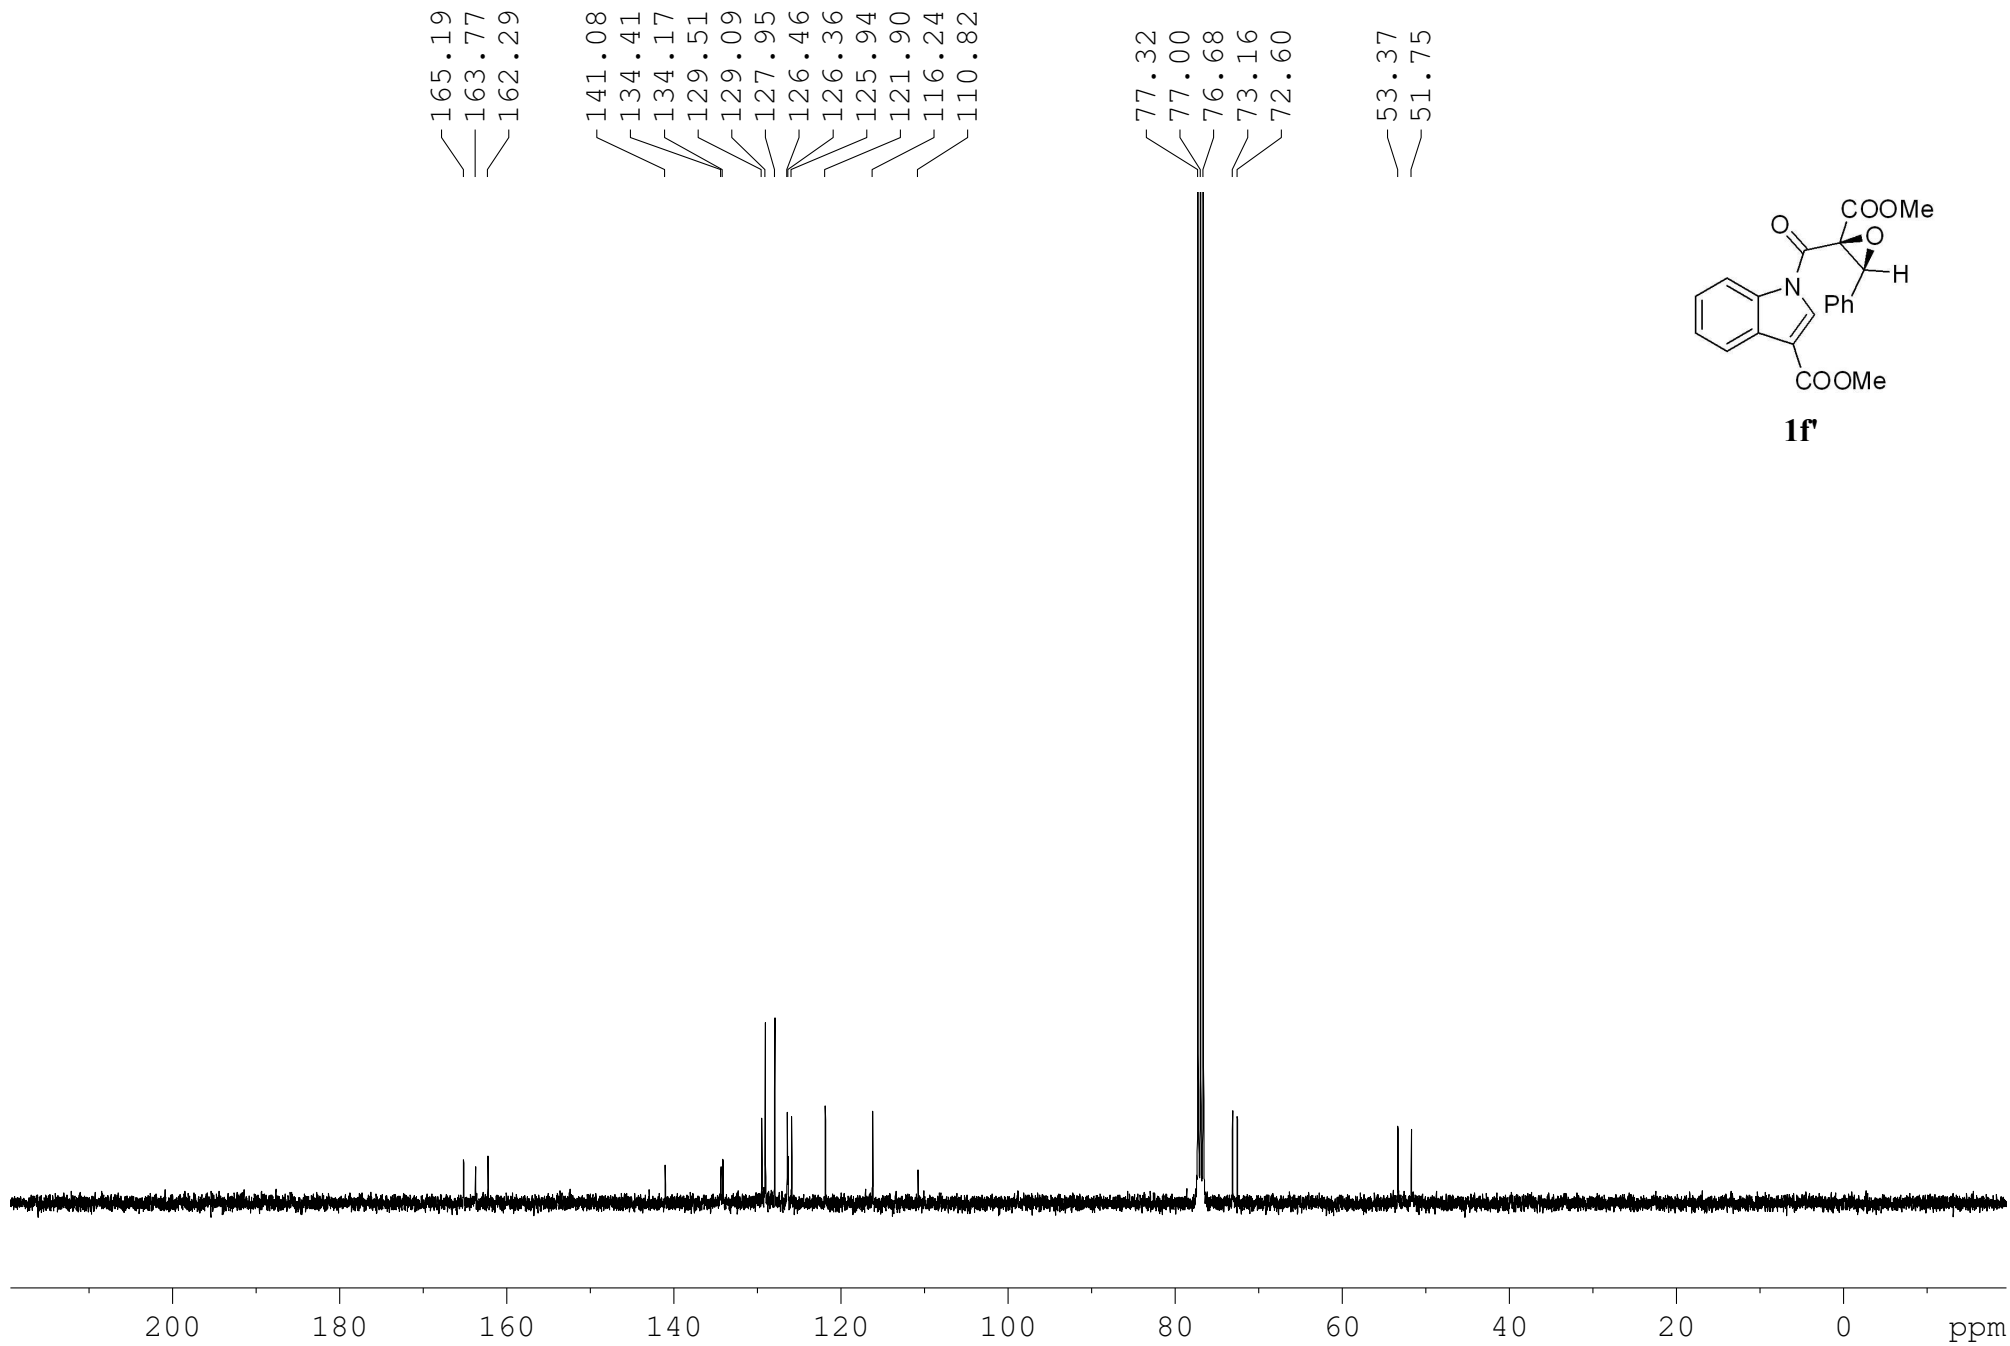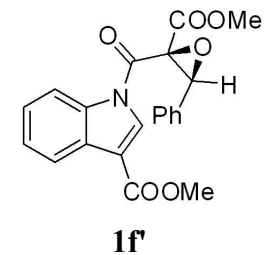

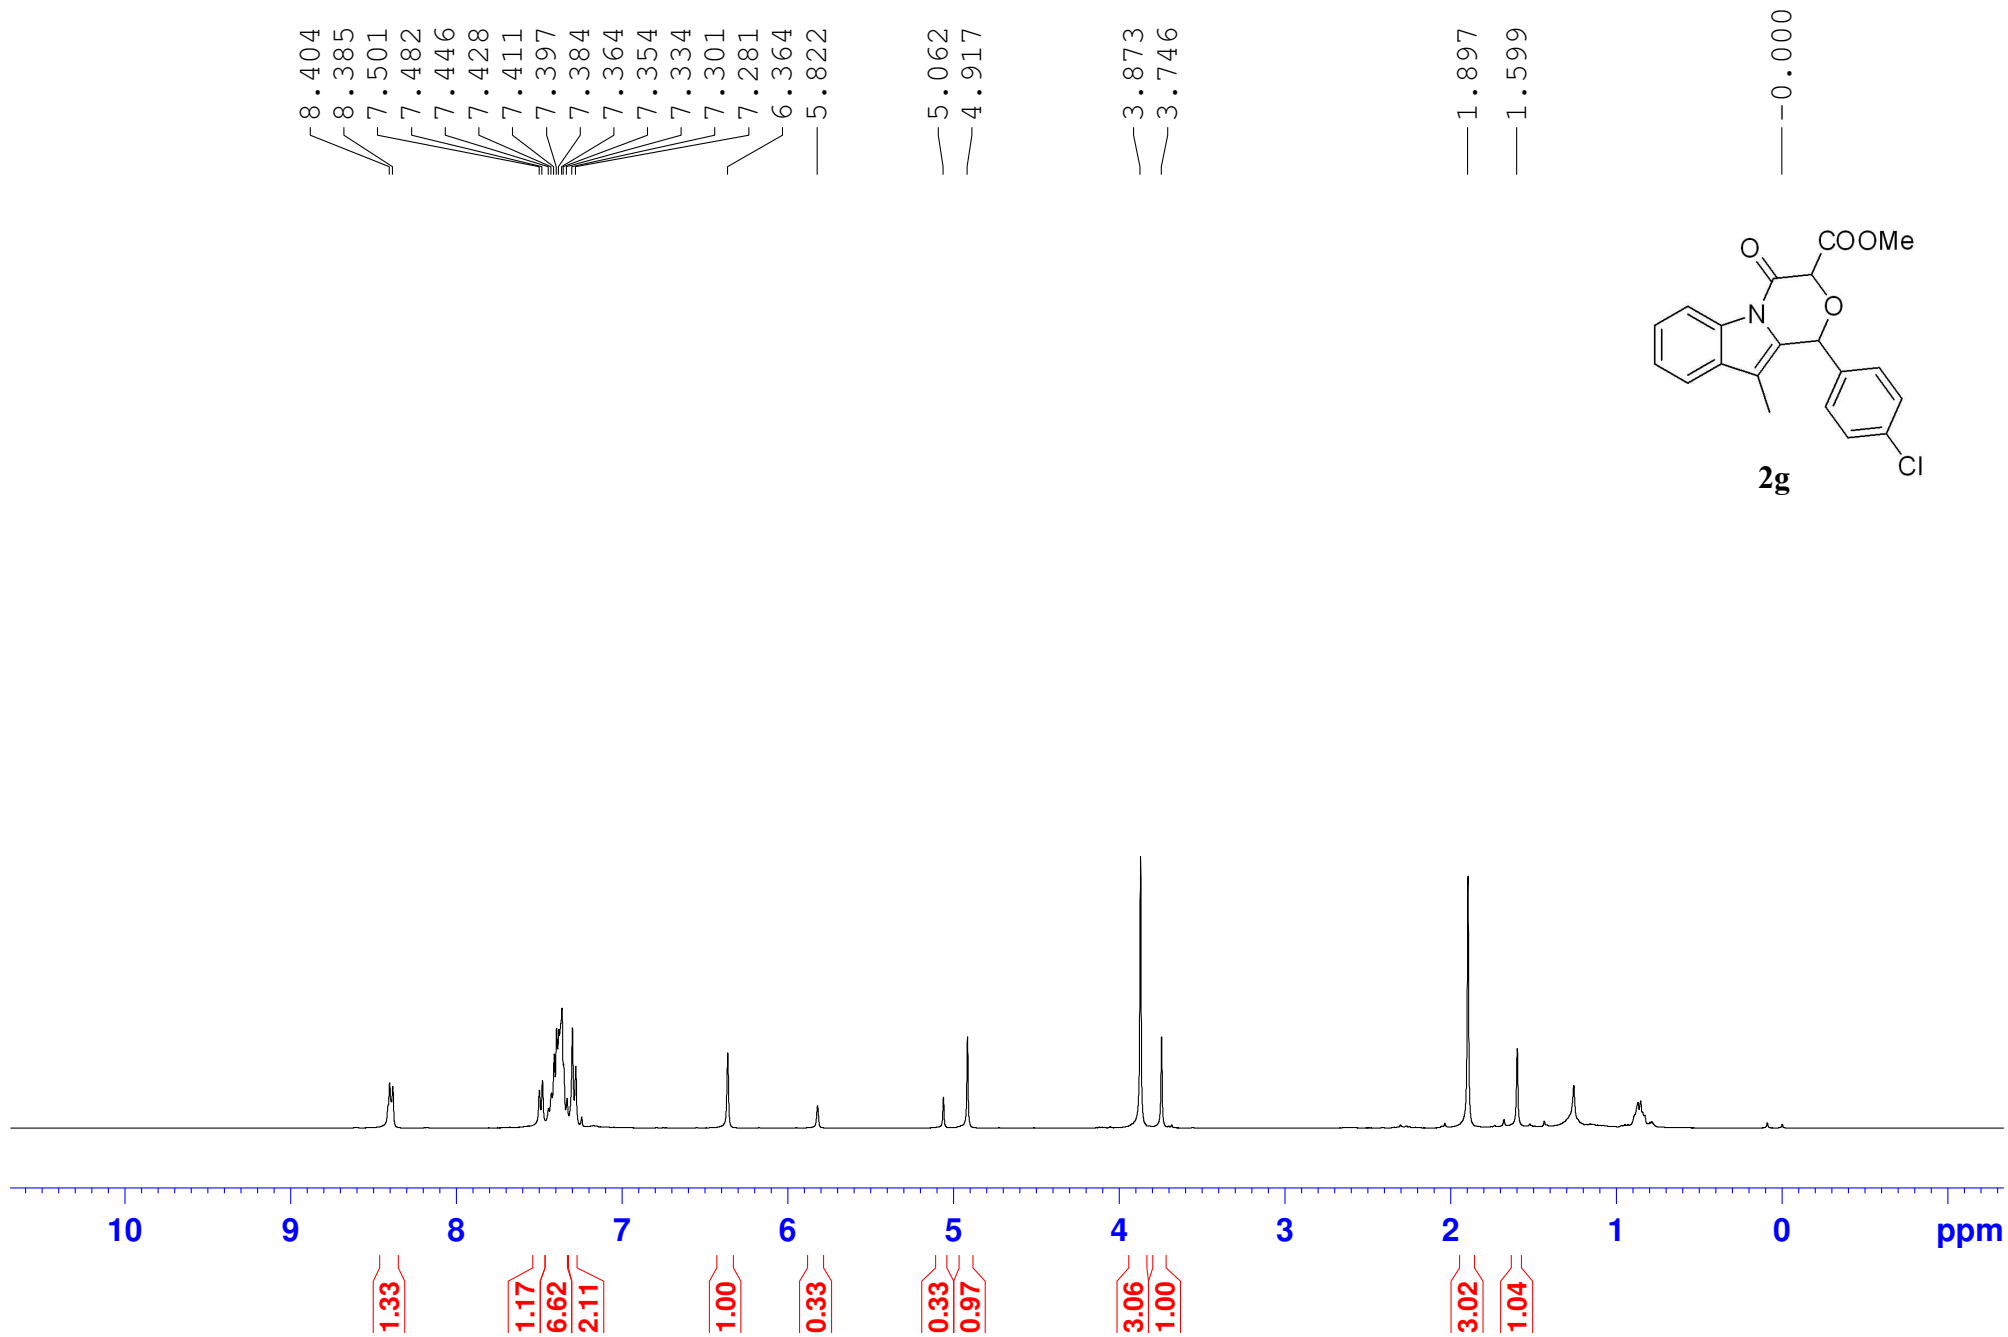

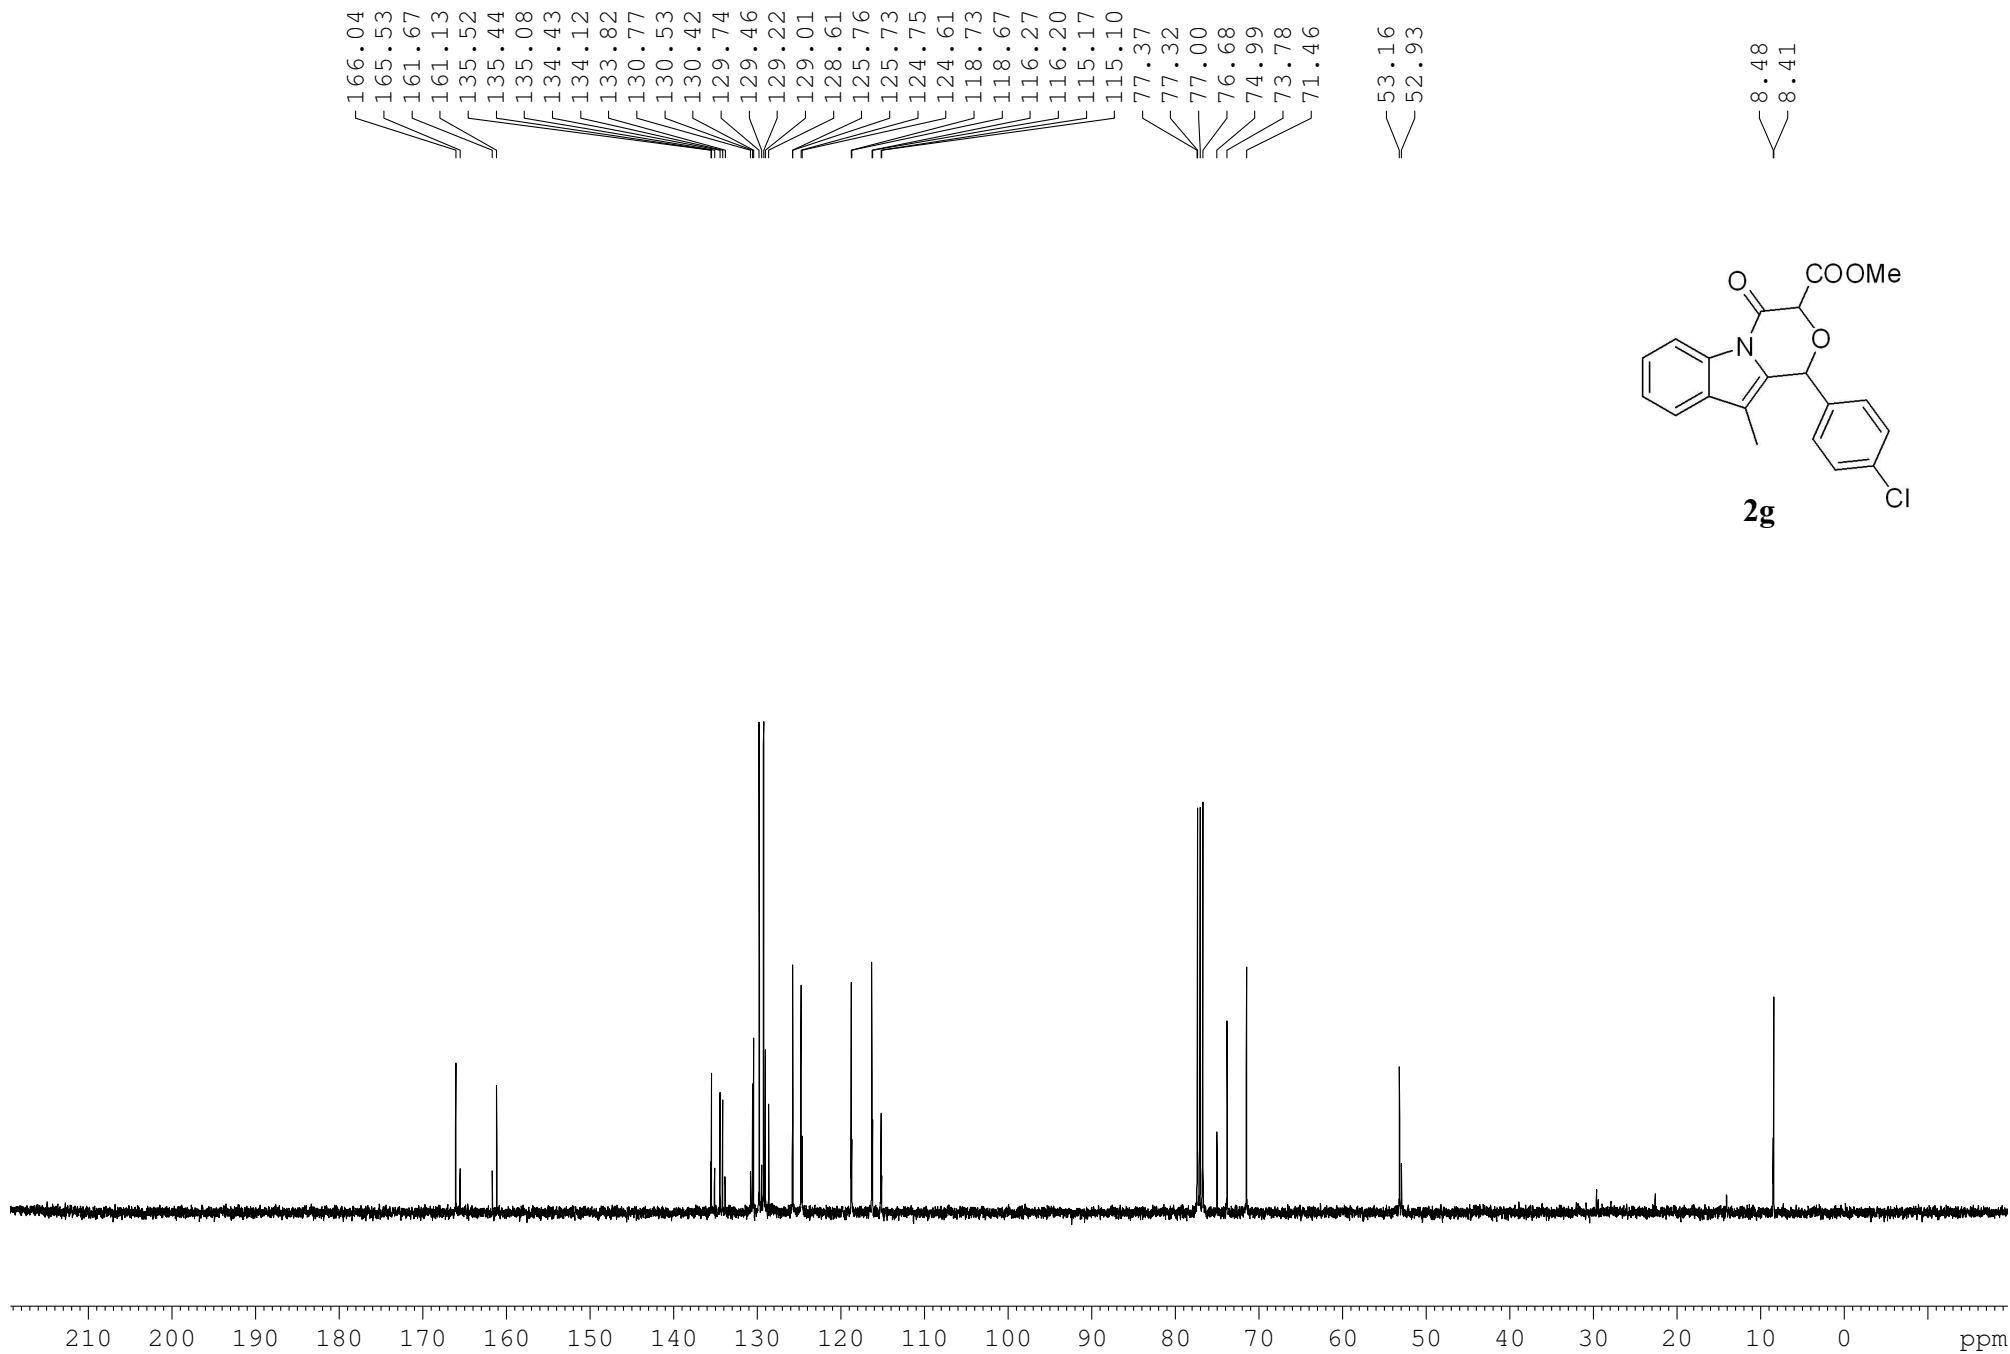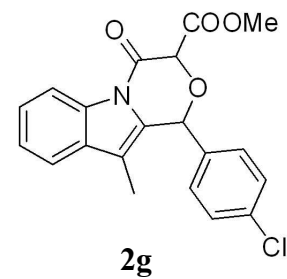

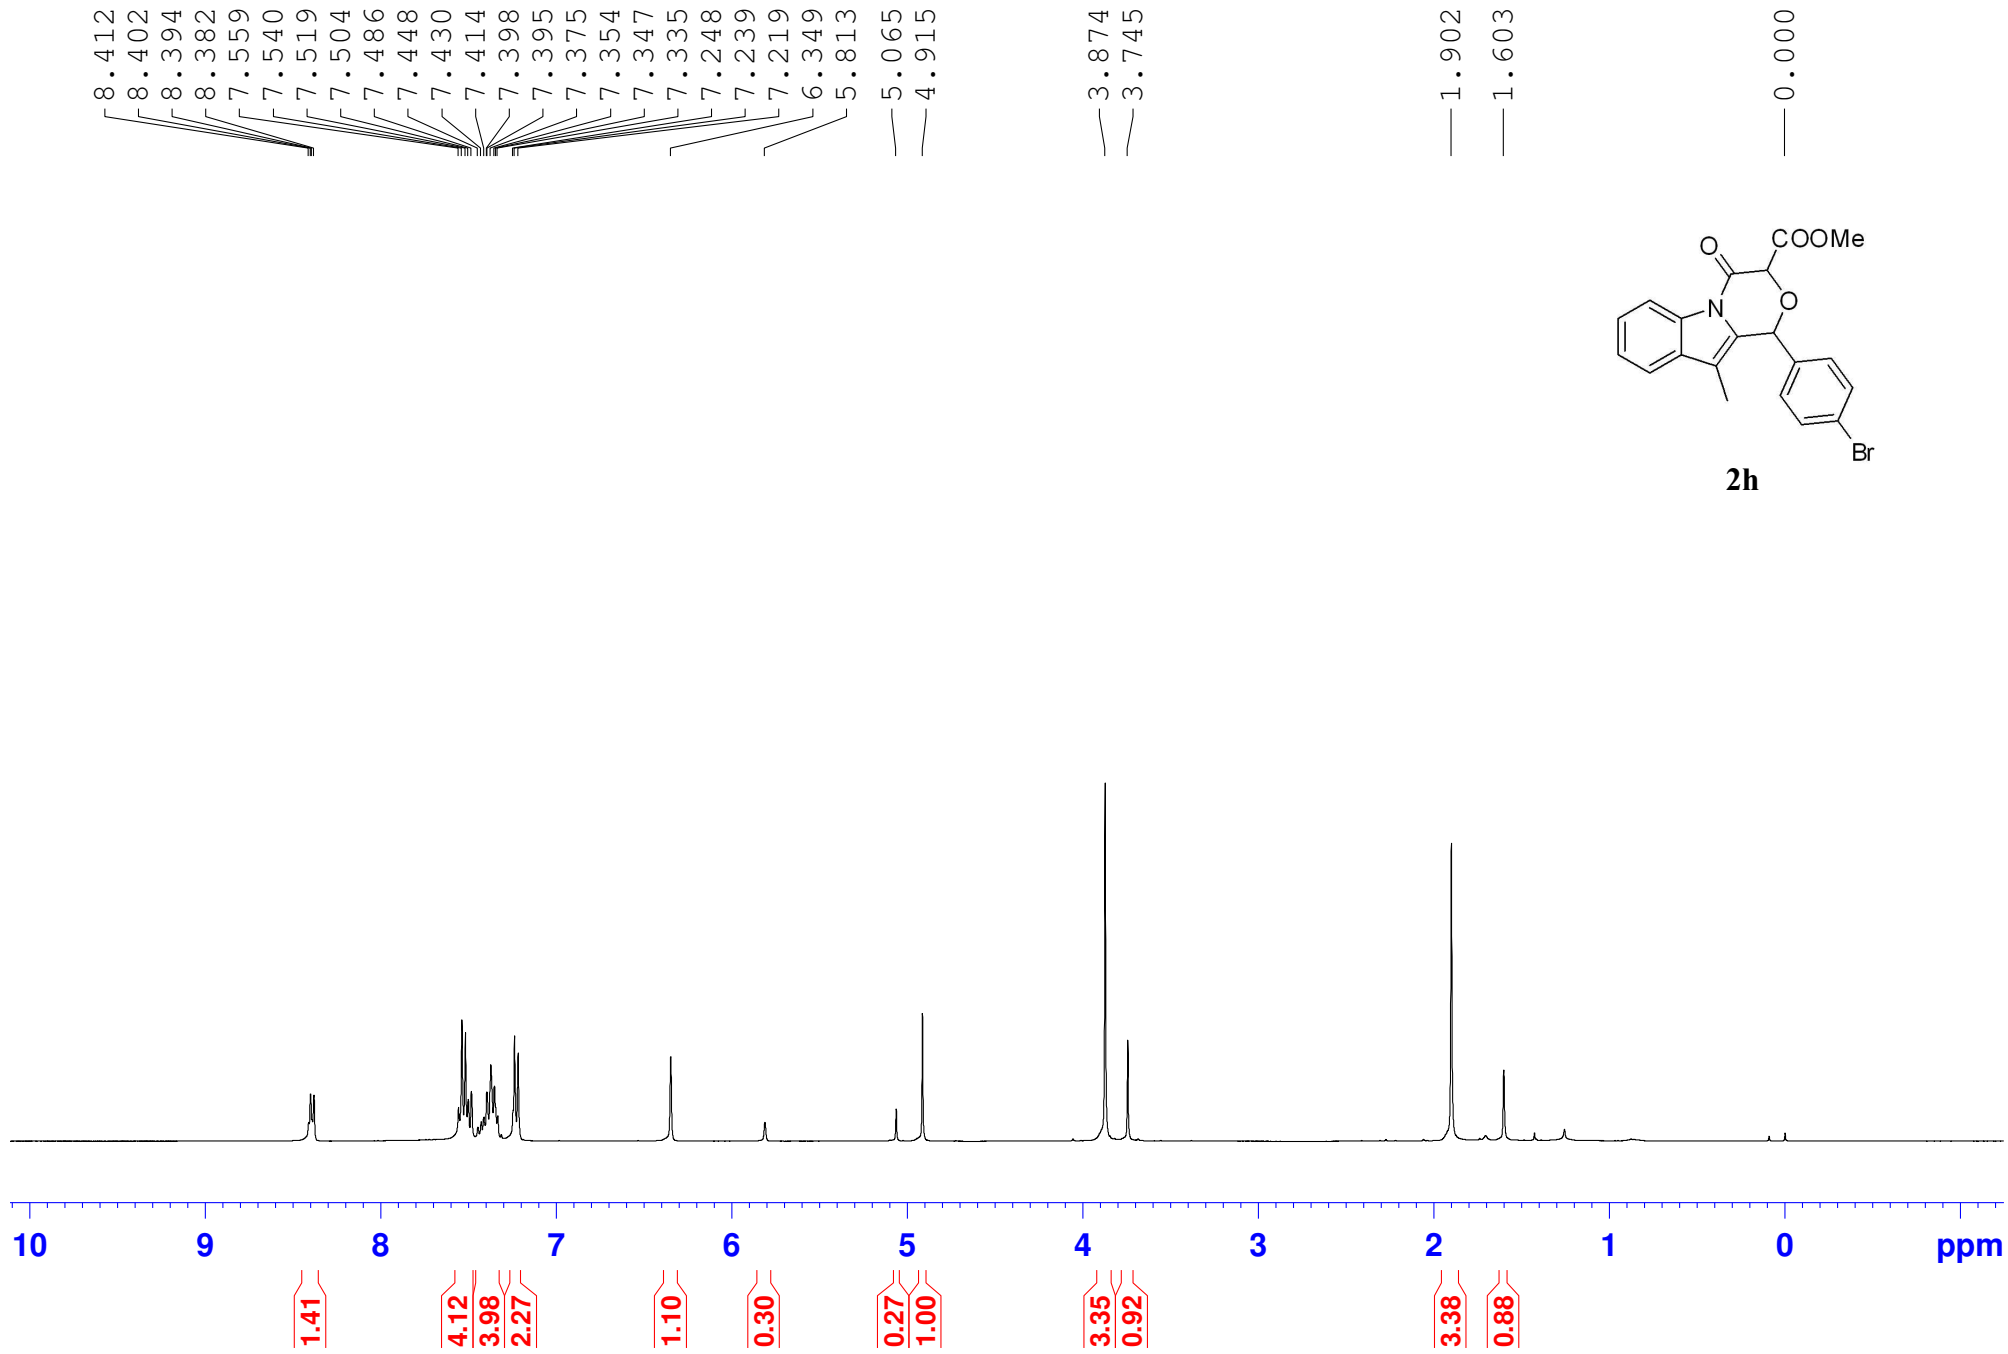

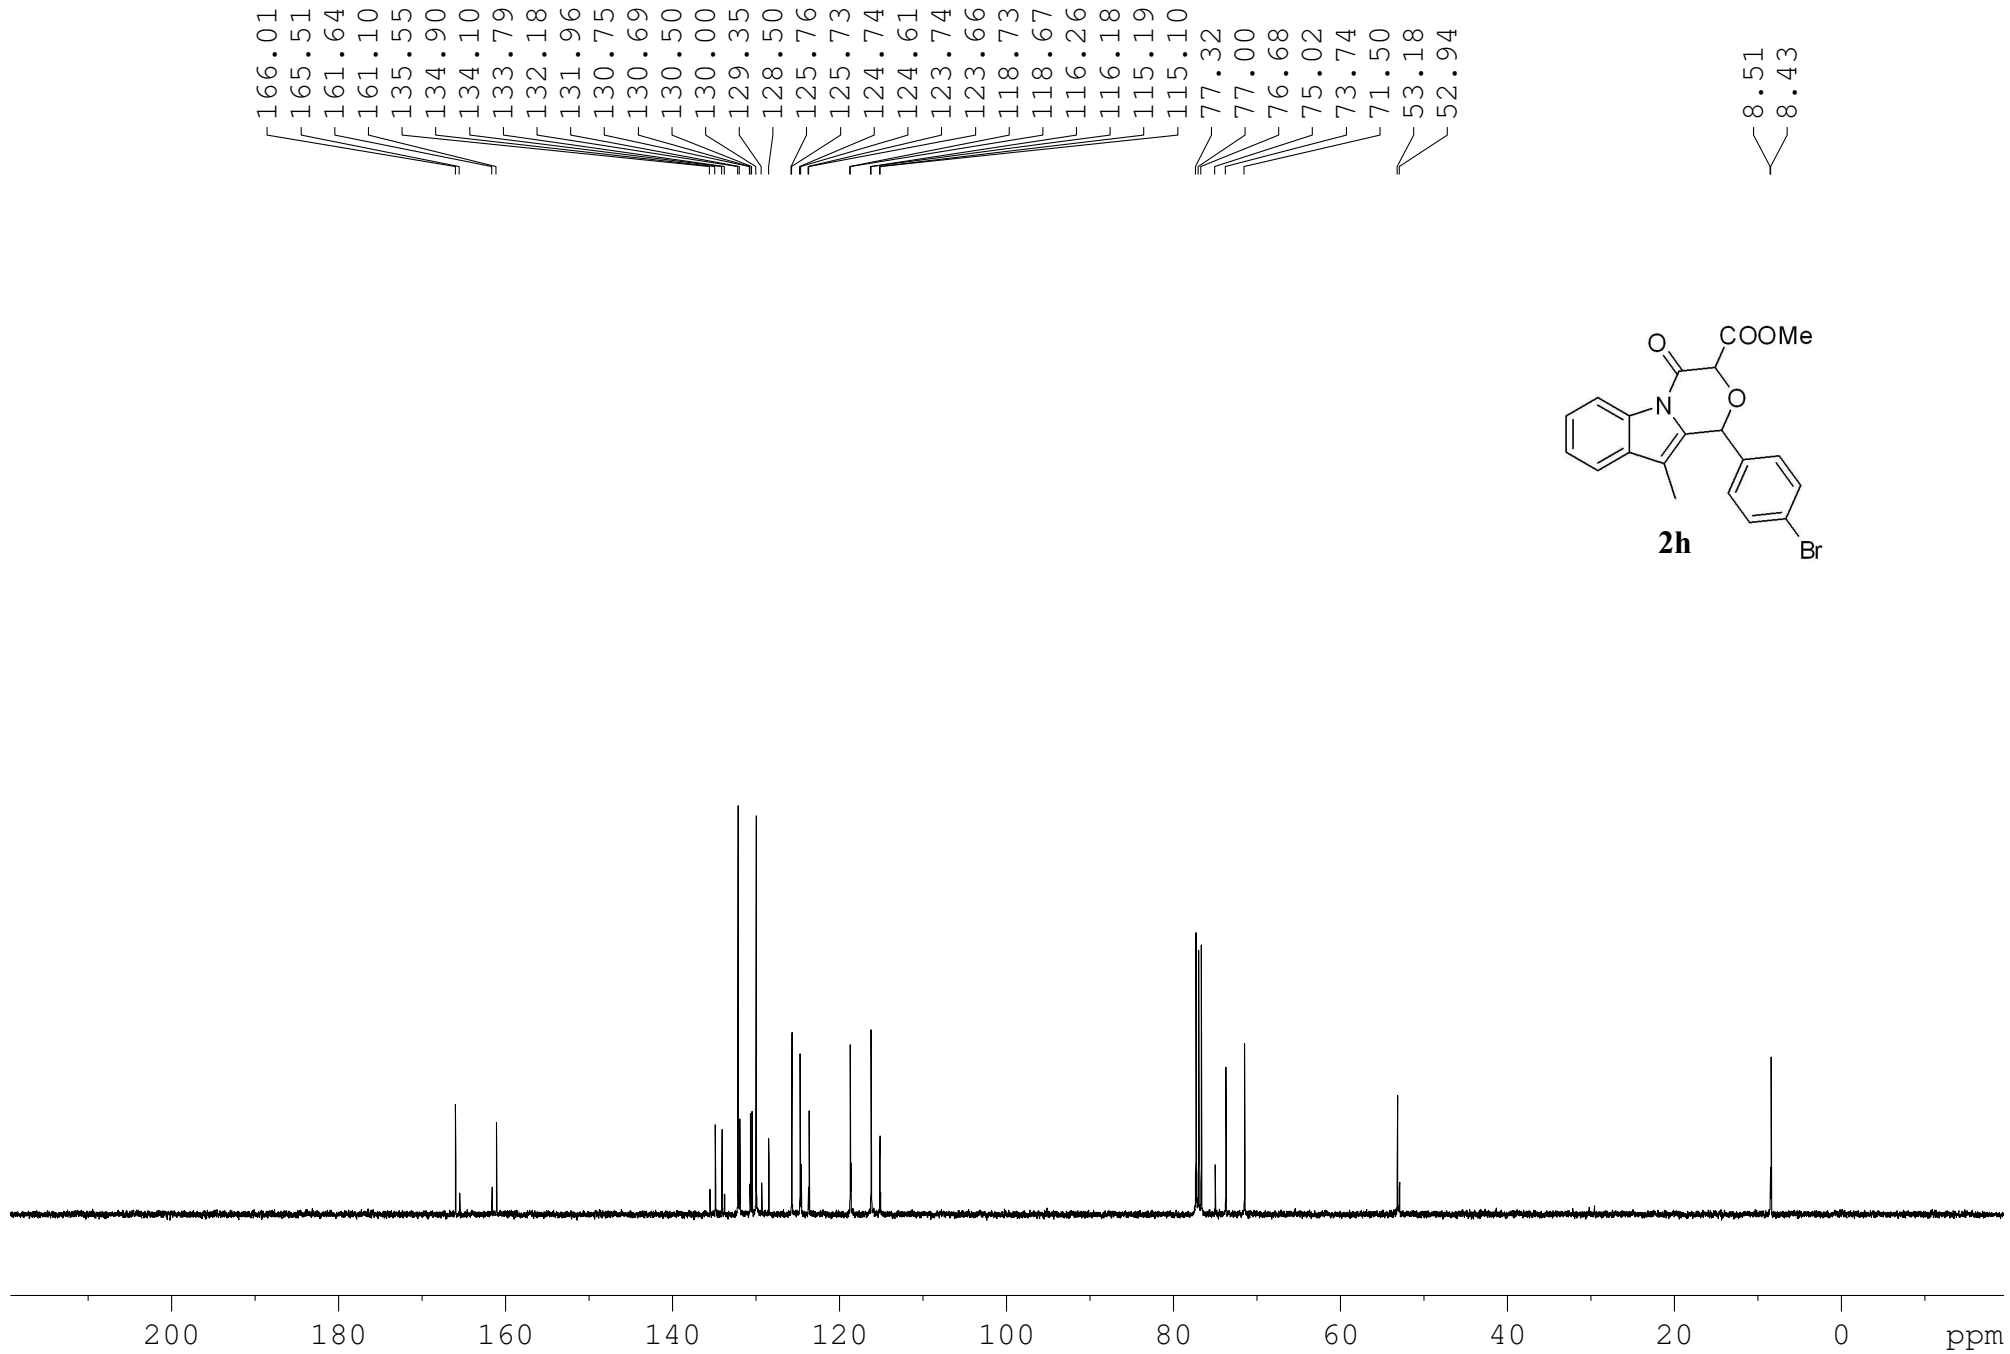

166.01  
165.51  
161.64  
161.10  
135.55  
134.90  
134.10  
133.79  
132.18  
131.96  
130.75  
130.69  
130.50  
130.00  
129.35  
128.50  
125.76  
125.73  
124.74  
124.61  
123.74  
123.66  
118.73  
118.67  
116.26  
116.18  
115.19  
115.10  
77.32  
77.00  
76.68  
75.02  
73.74  
71.50  
53.18  
52.94

8.51  
8.43



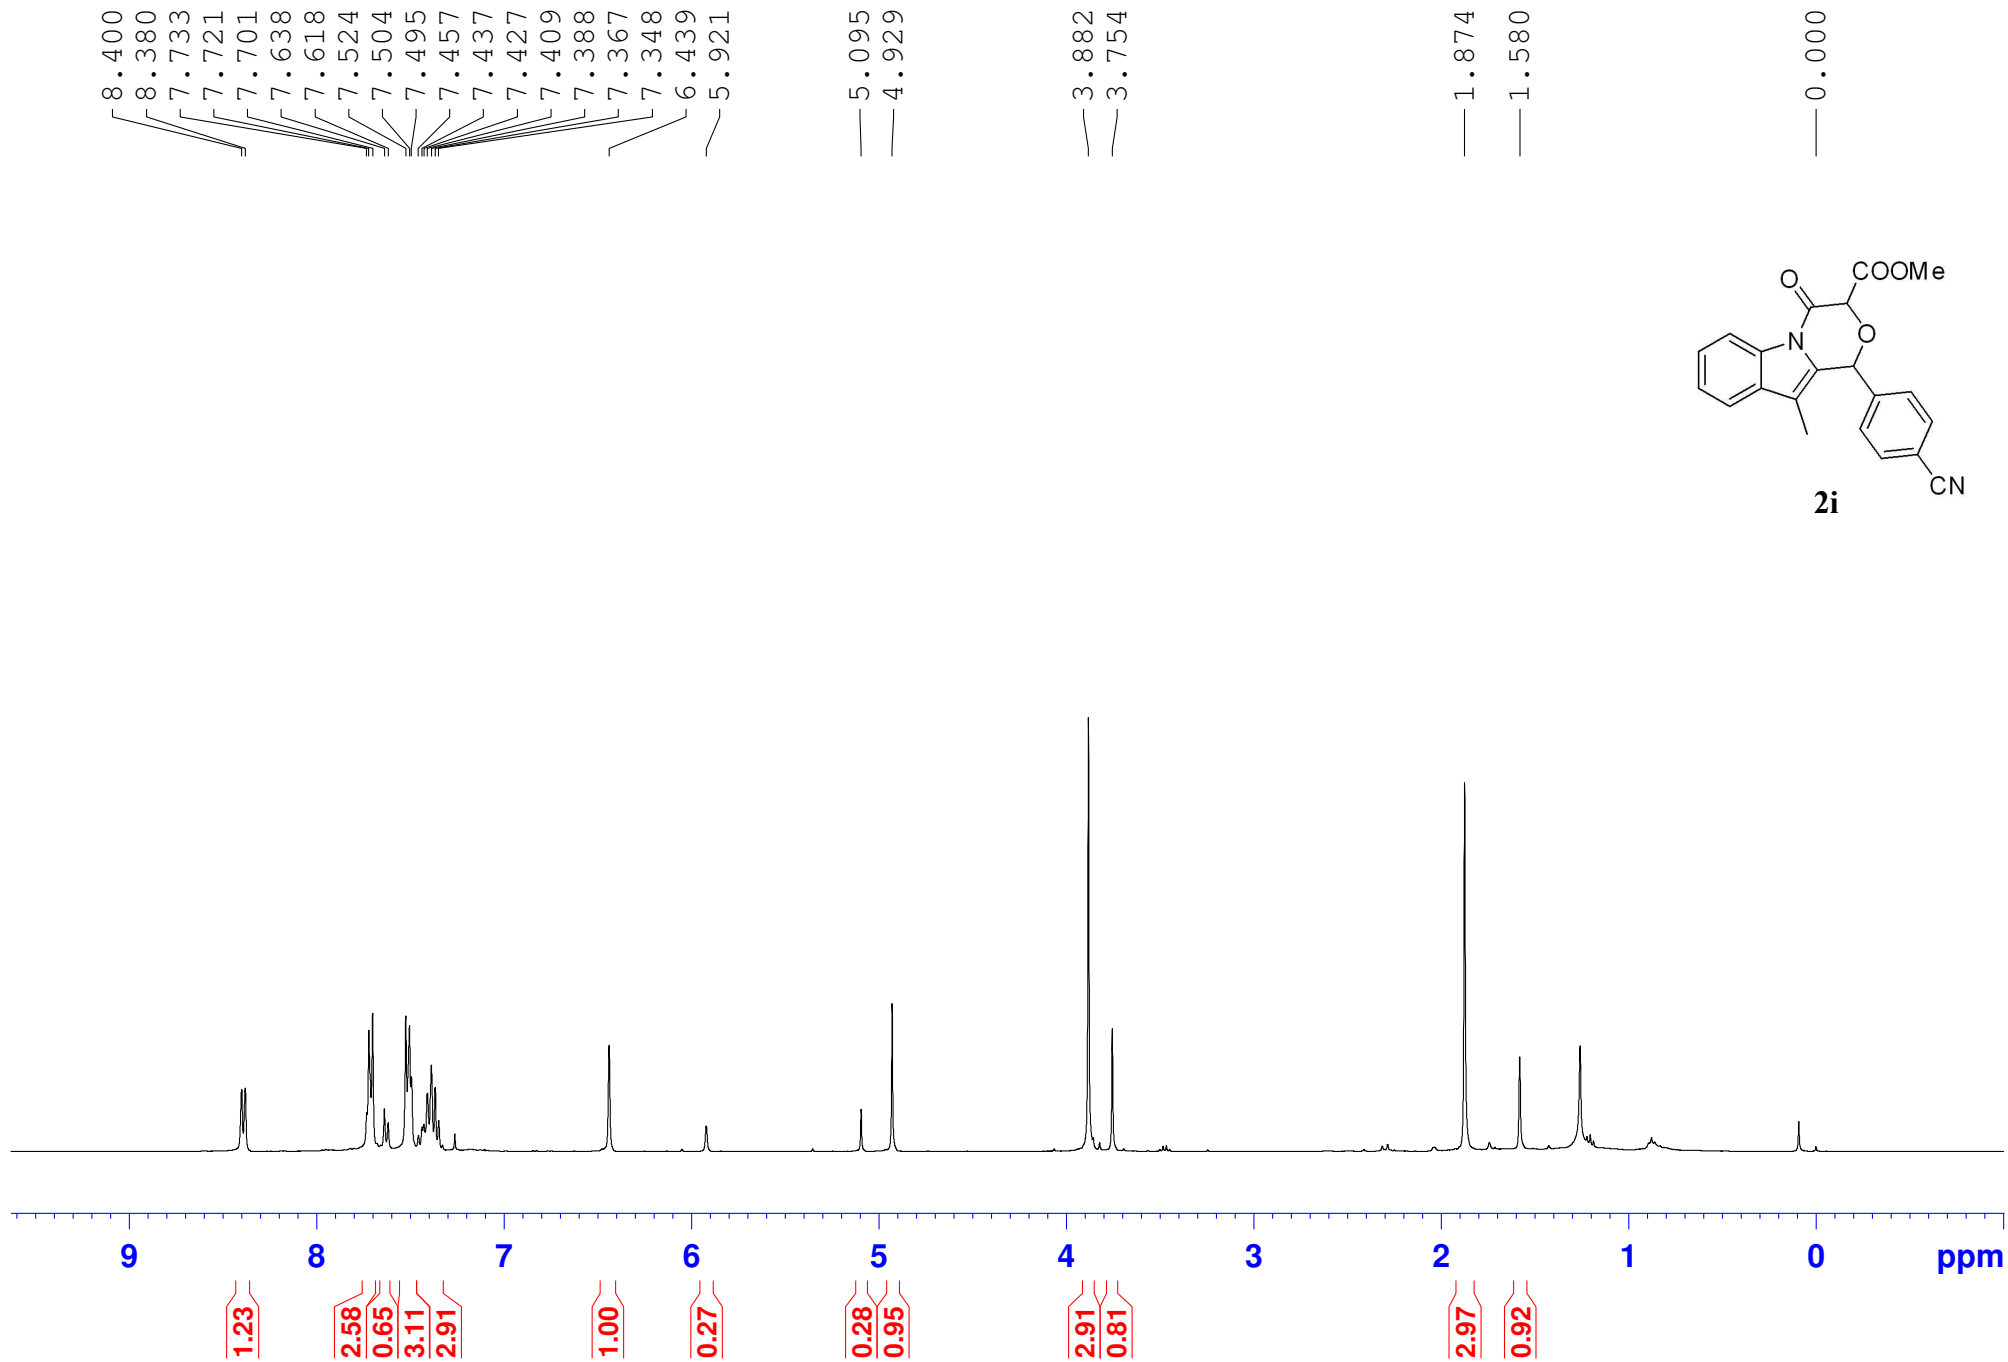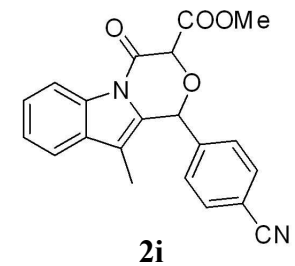

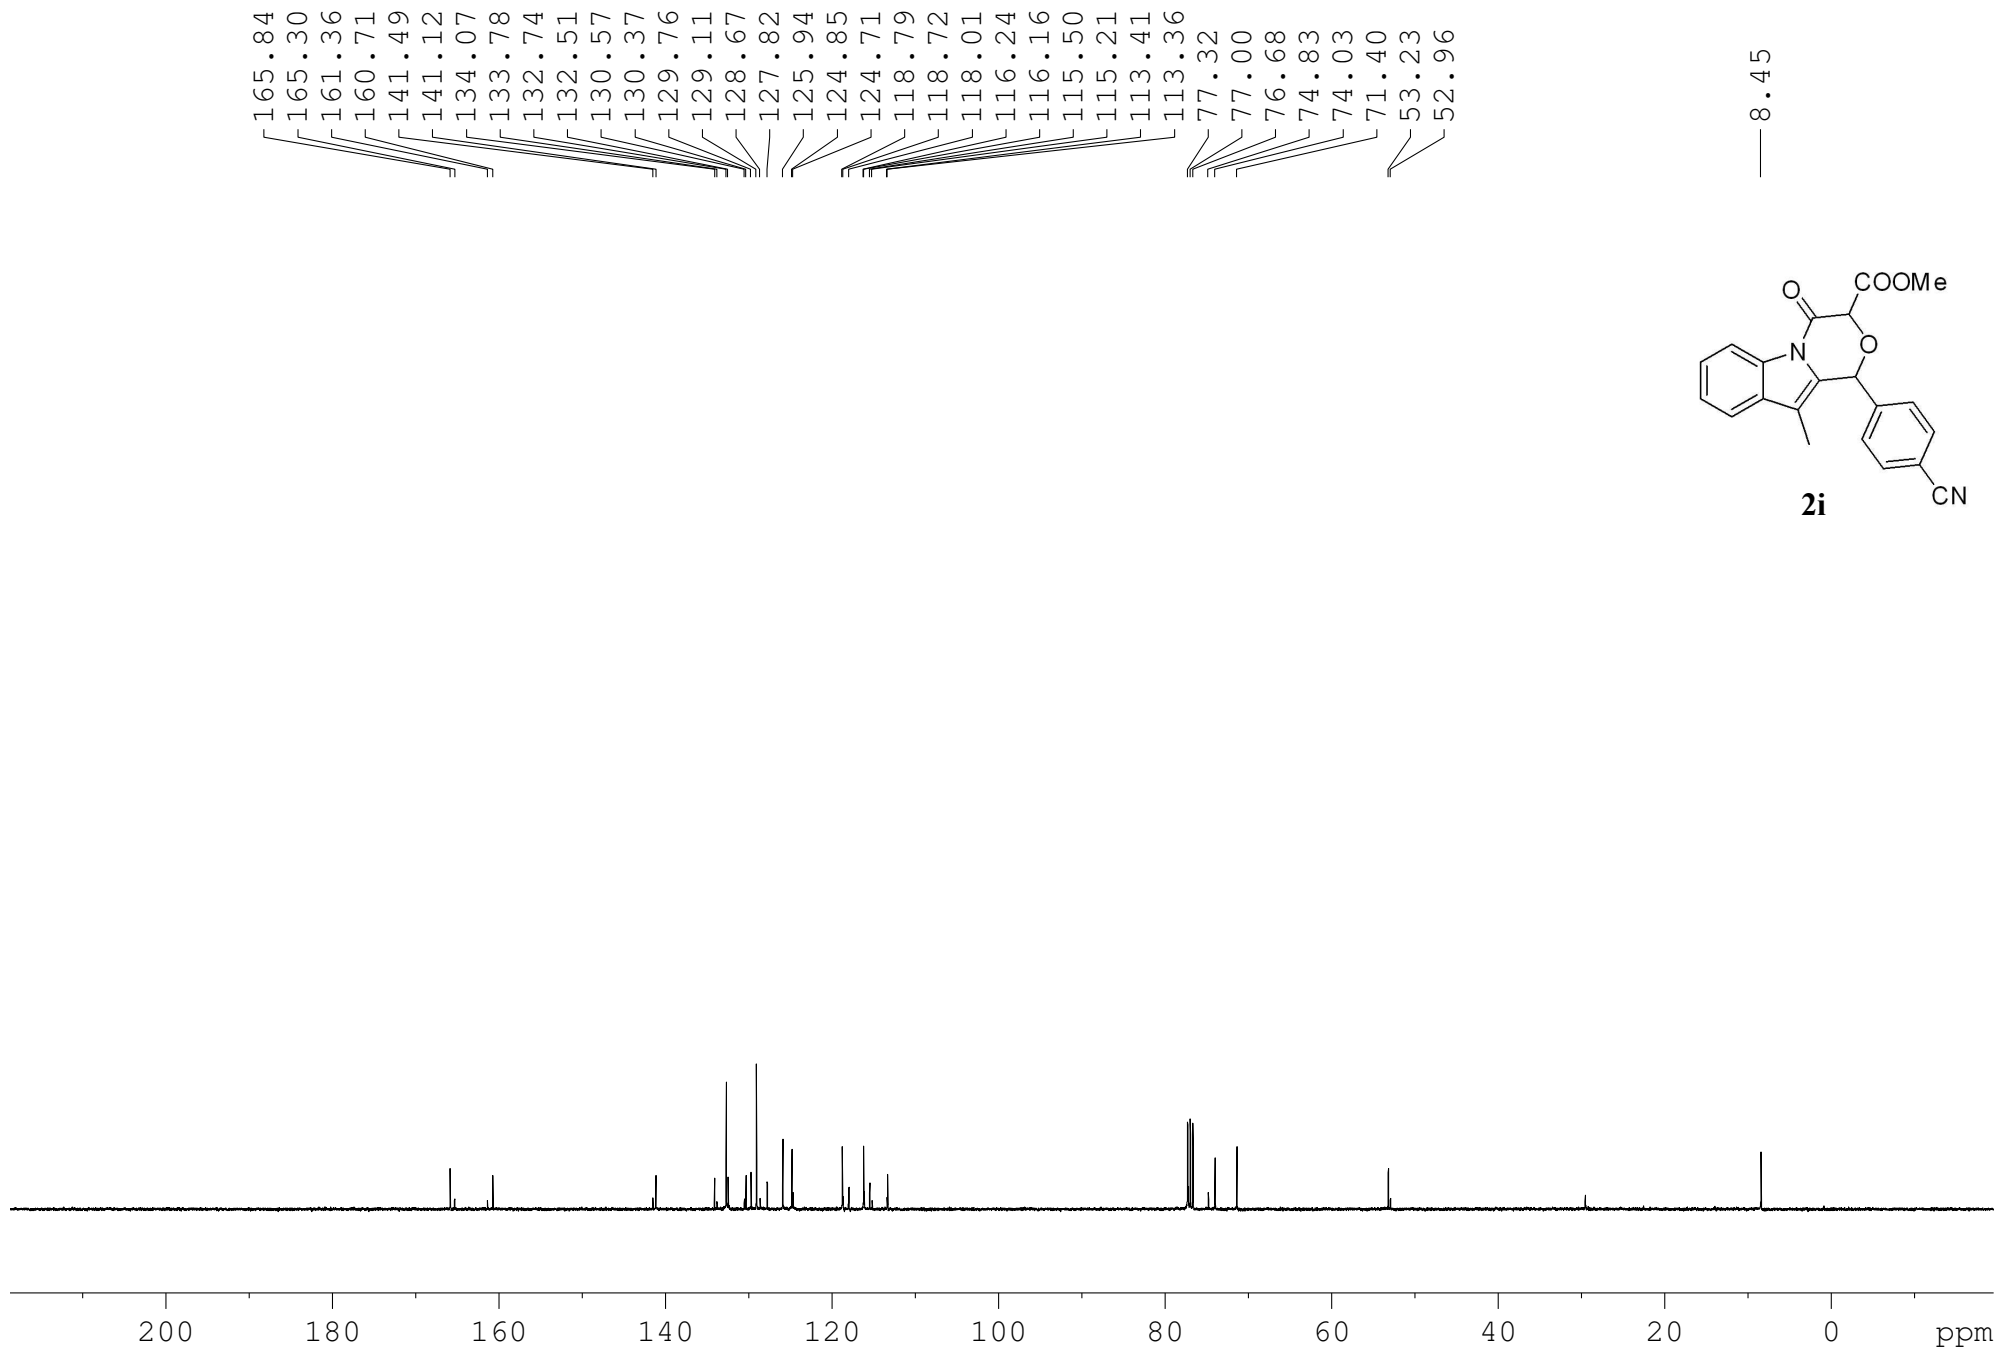

165.84  
165.30  
161.36  
160.71  
141.49  
141.12  
134.07  
133.78  
132.74  
132.51  
130.57  
130.37  
129.76  
129.11  
128.67  
127.82  
125.94  
124.85  
124.71  
118.79  
118.72  
118.01  
116.24  
116.16  
115.50  
115.21  
113.41  
113.36  
77.32  
77.00  
76.68  
74.83  
74.03  
71.40  
53.23  
52.96

— 8.45

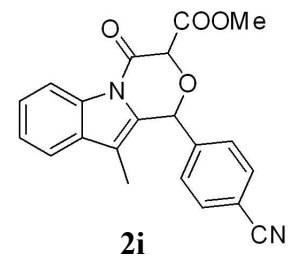

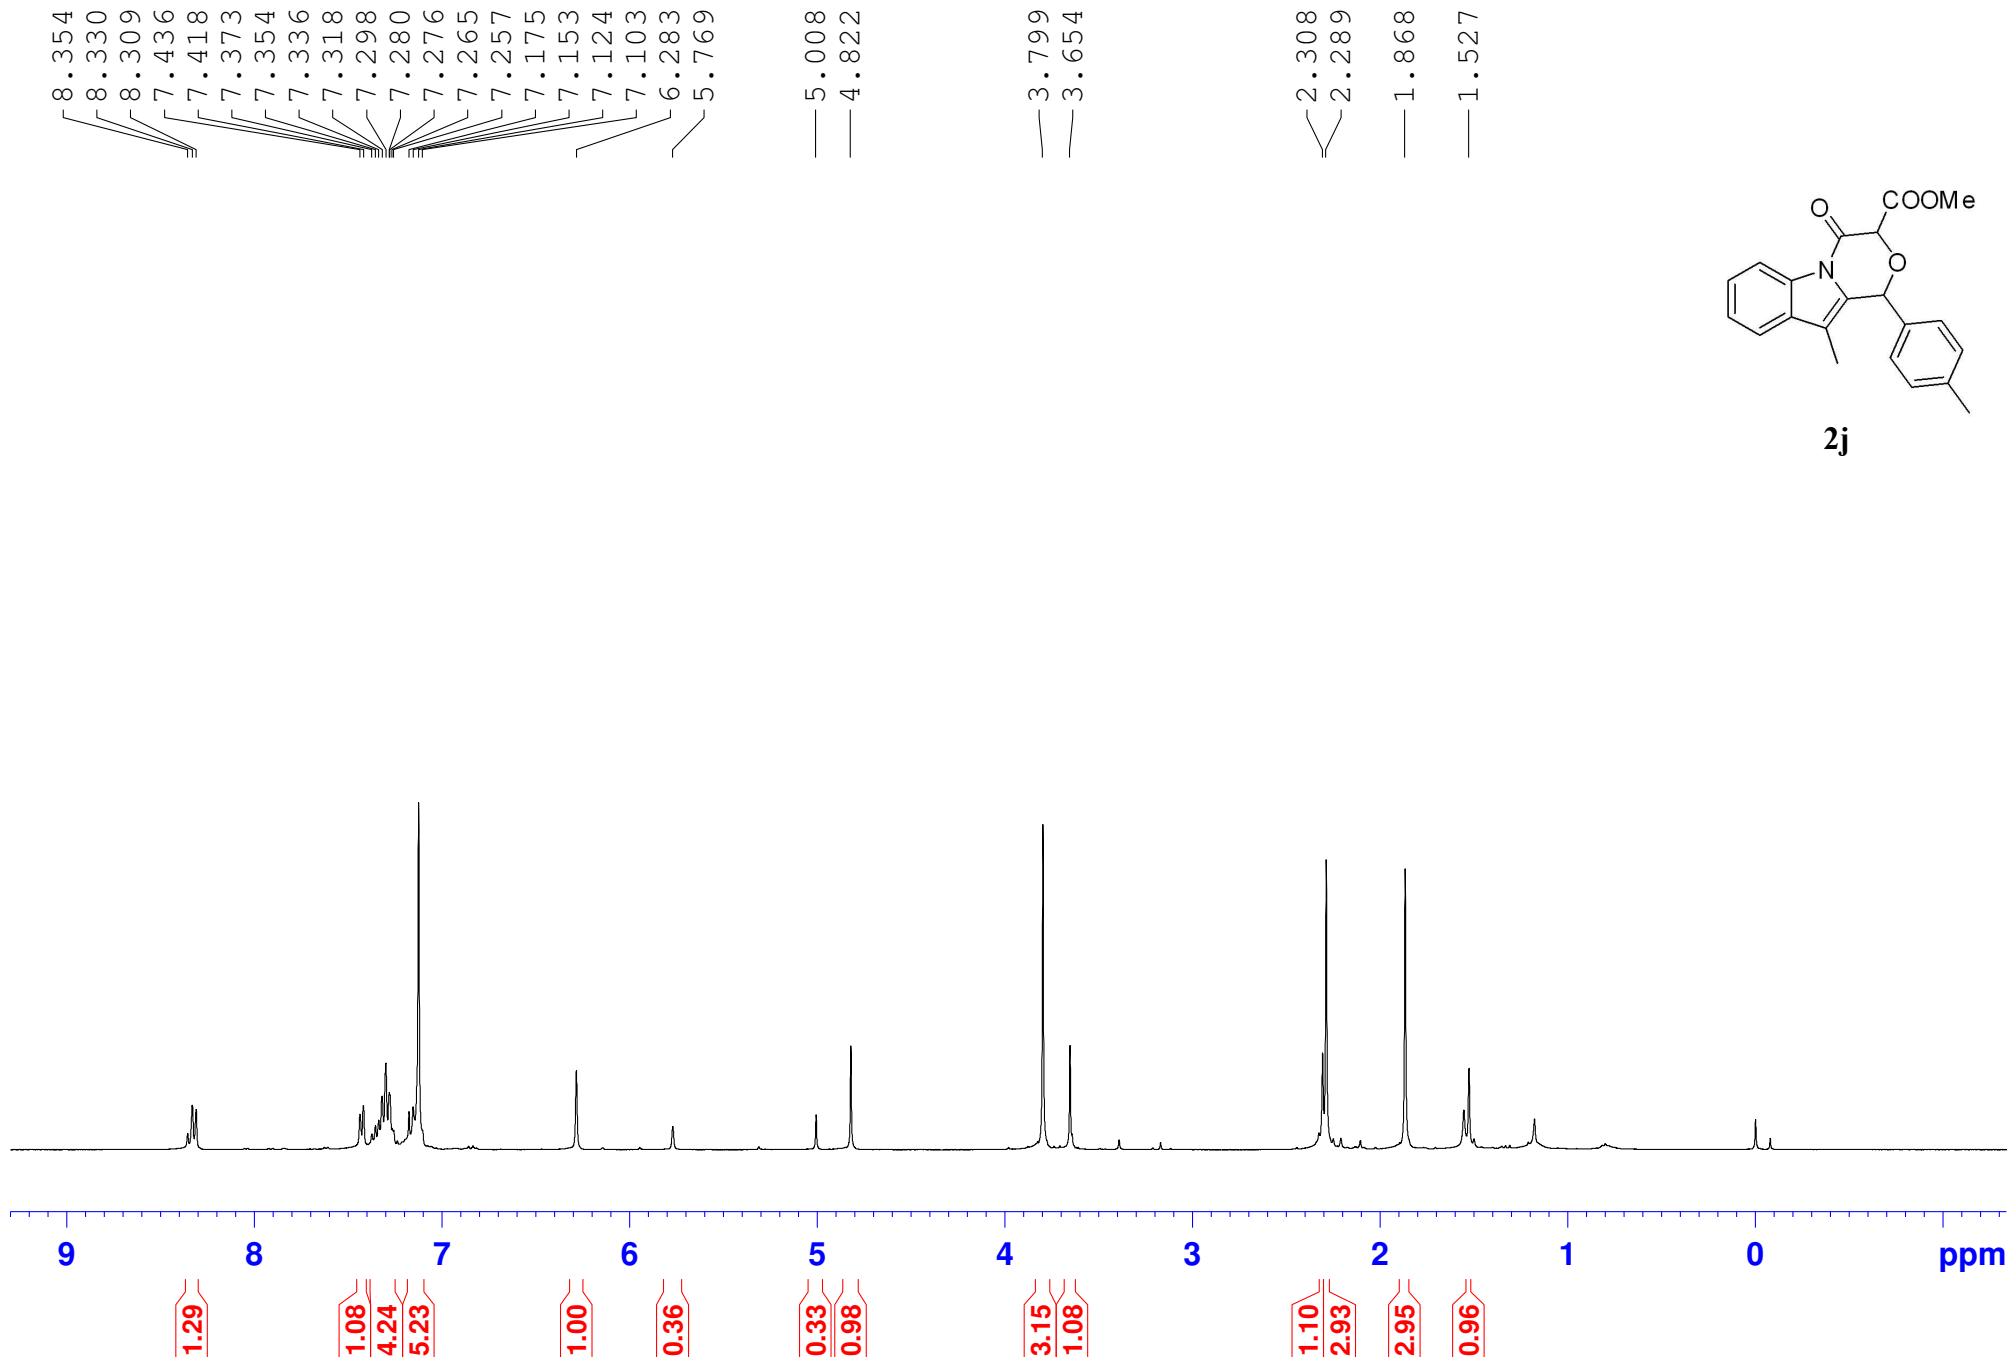

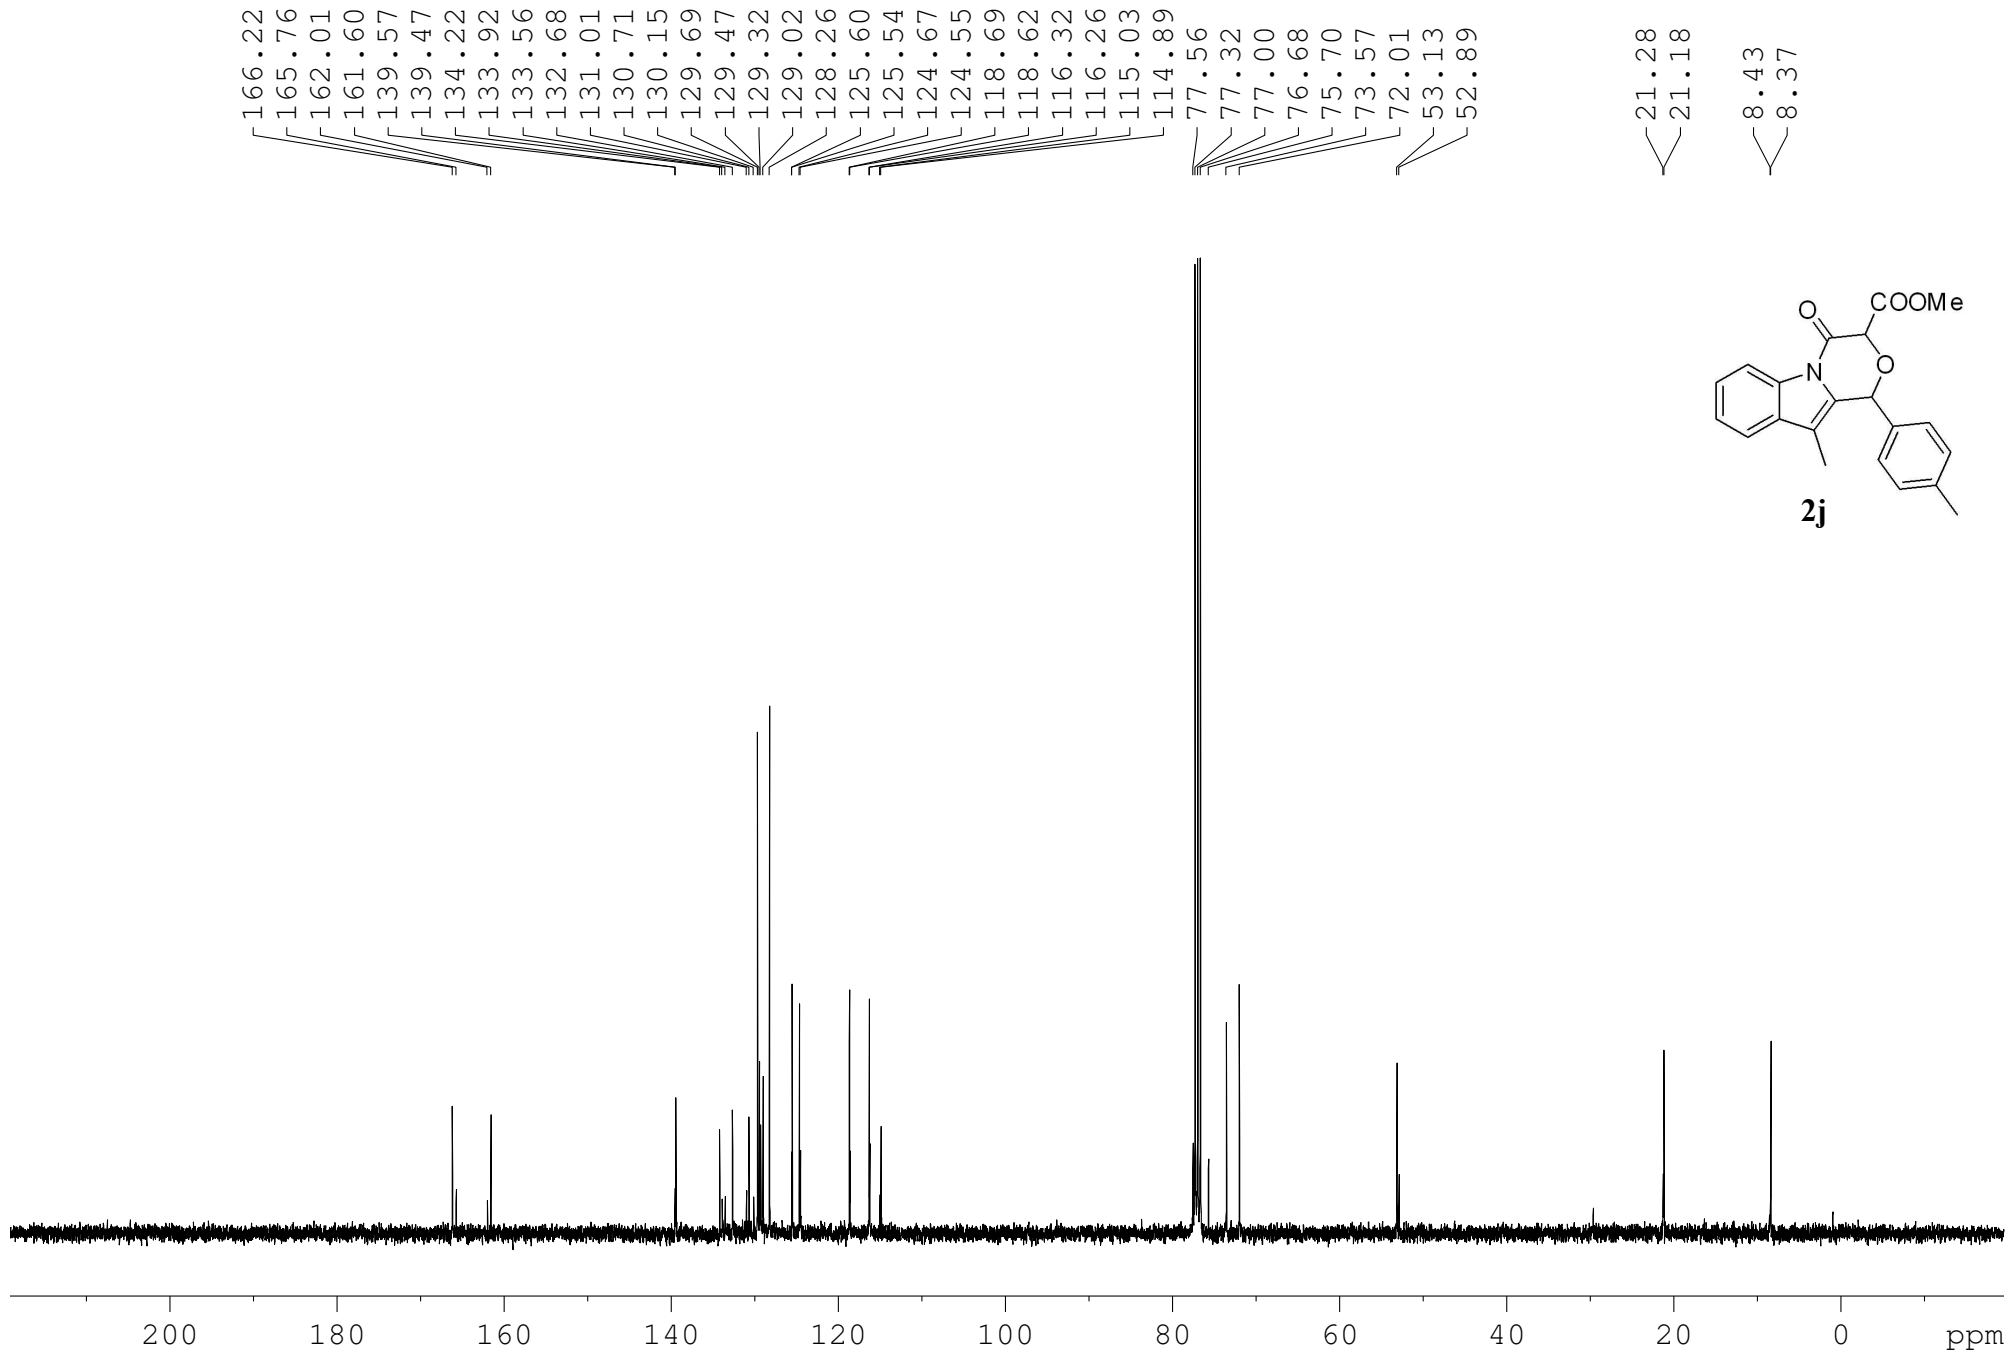

166.22  
165.76  
162.01  
161.60  
139.57  
139.47  
134.22  
133.92  
133.56  
132.68  
131.01  
130.71  
130.15  
129.69  
129.47  
129.32  
129.02  
128.26  
125.60  
125.54  
124.67  
124.55  
118.69  
118.62  
116.32  
116.26  
115.03  
114.89  
77.56  
77.32  
77.00  
76.68  
75.70  
73.57  
72.01  
53.13  
52.89

< 21.28  
< 21.18

< 8.43  
< 8.37

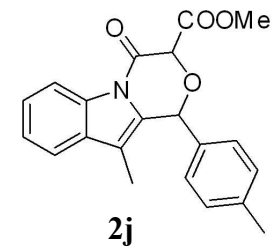

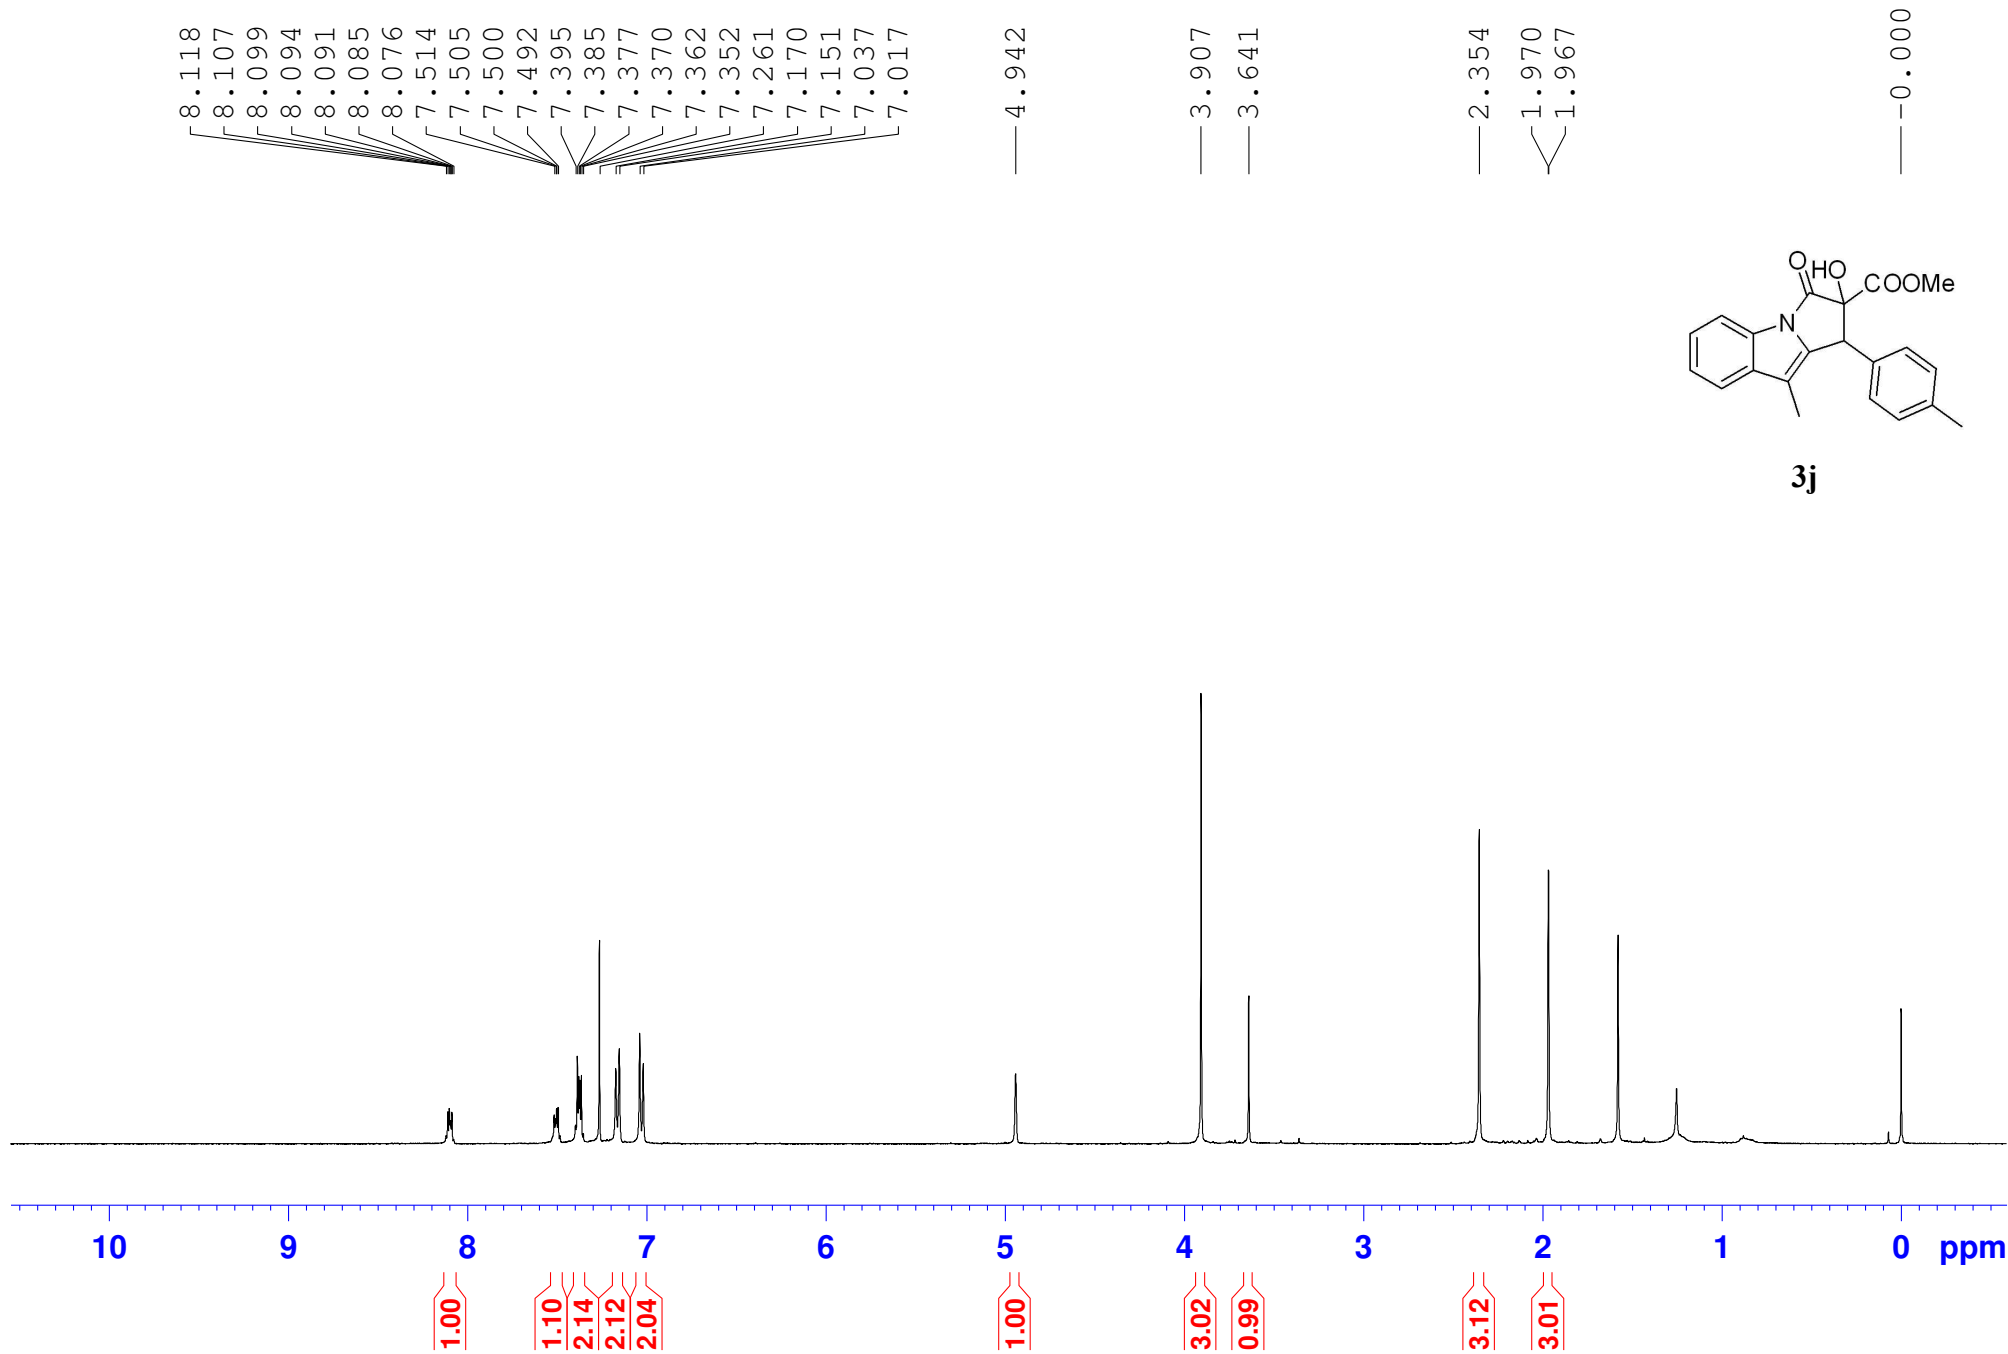

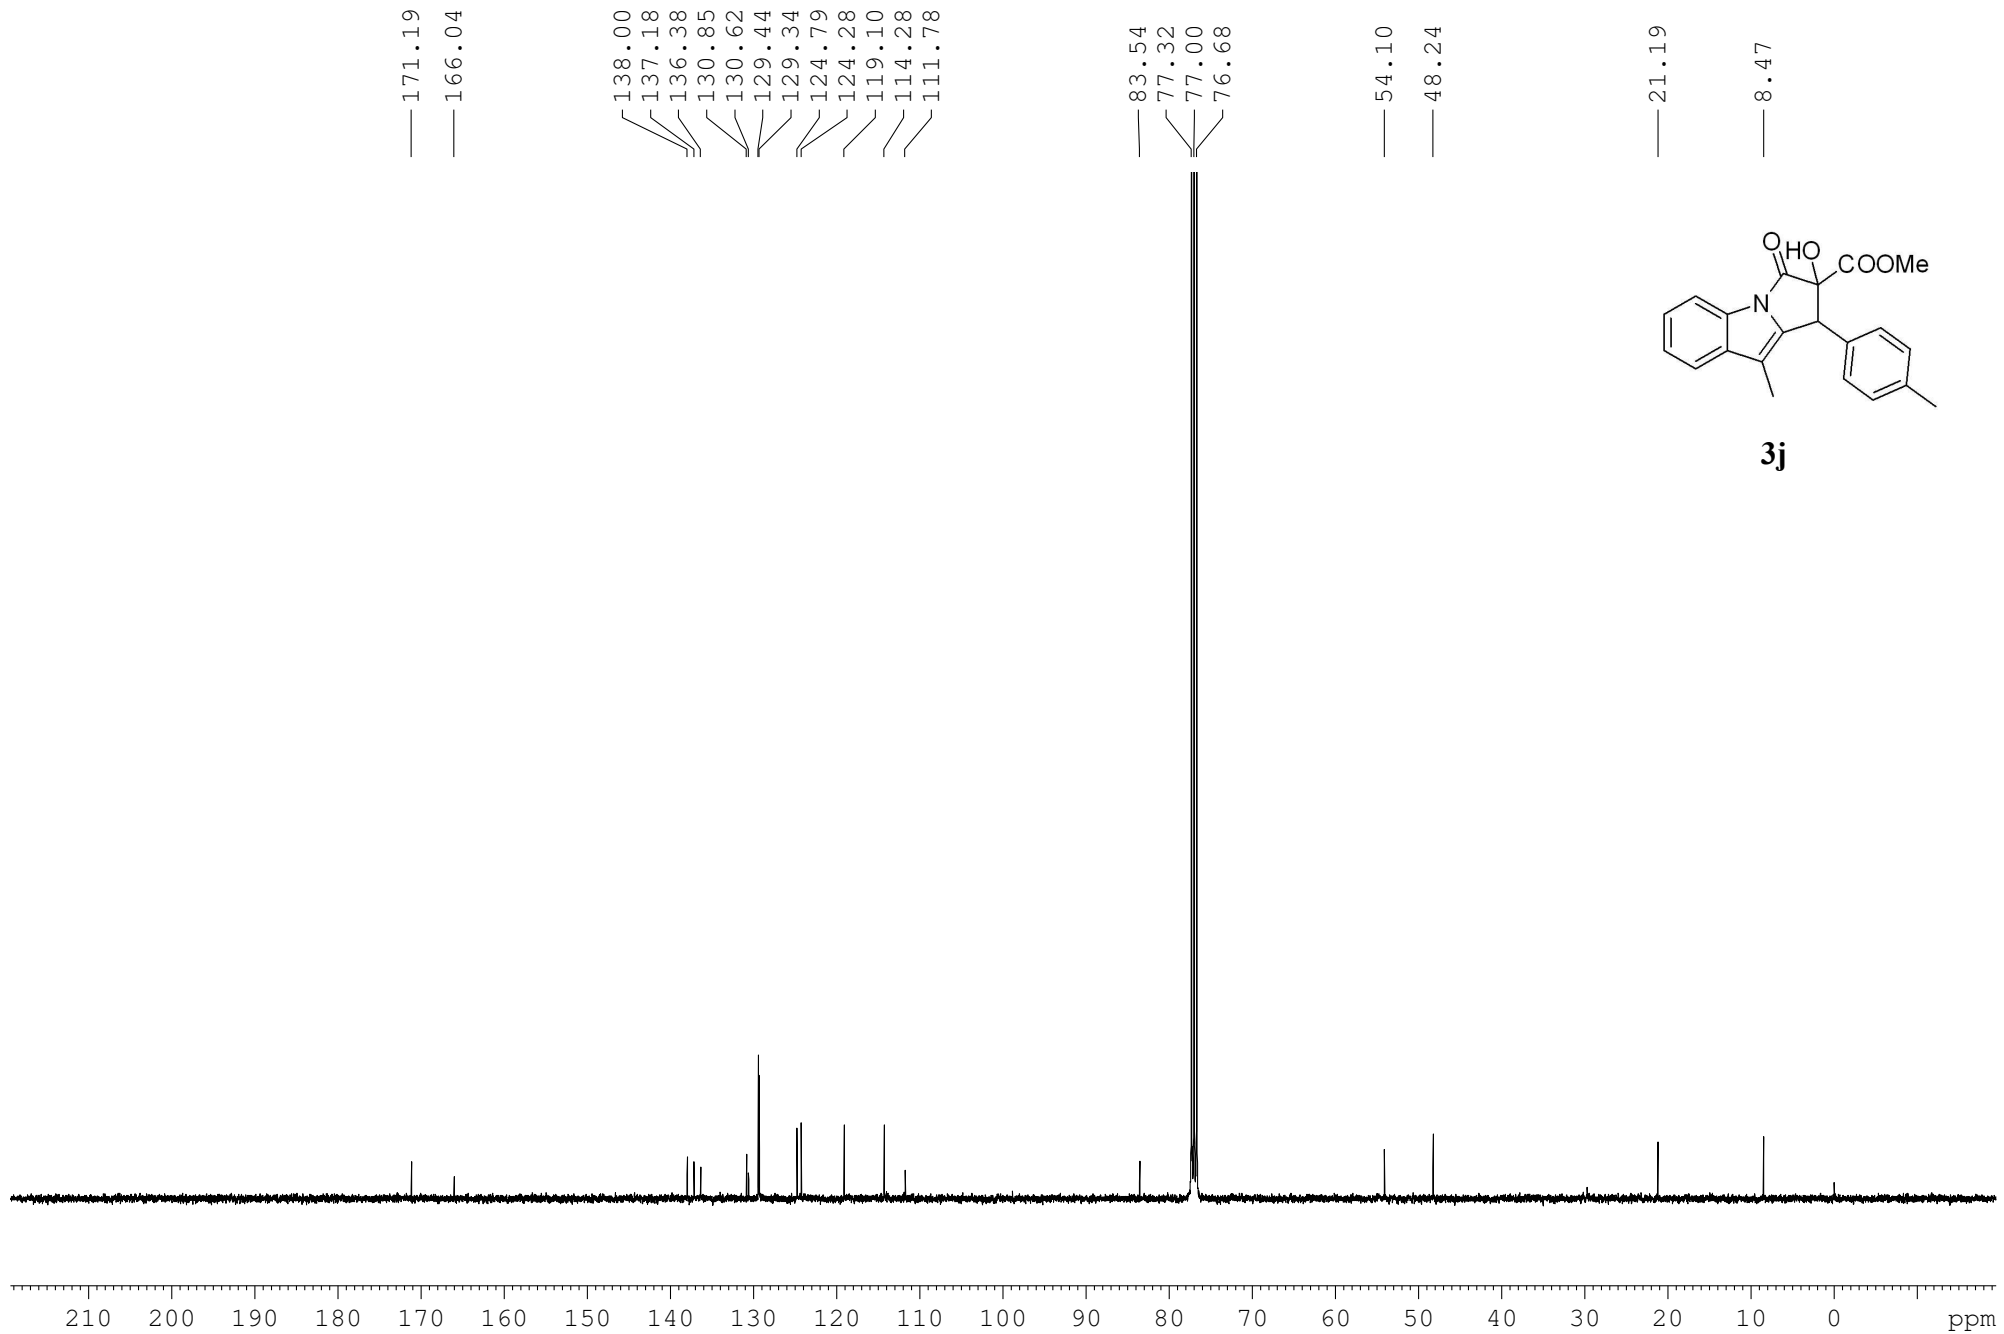

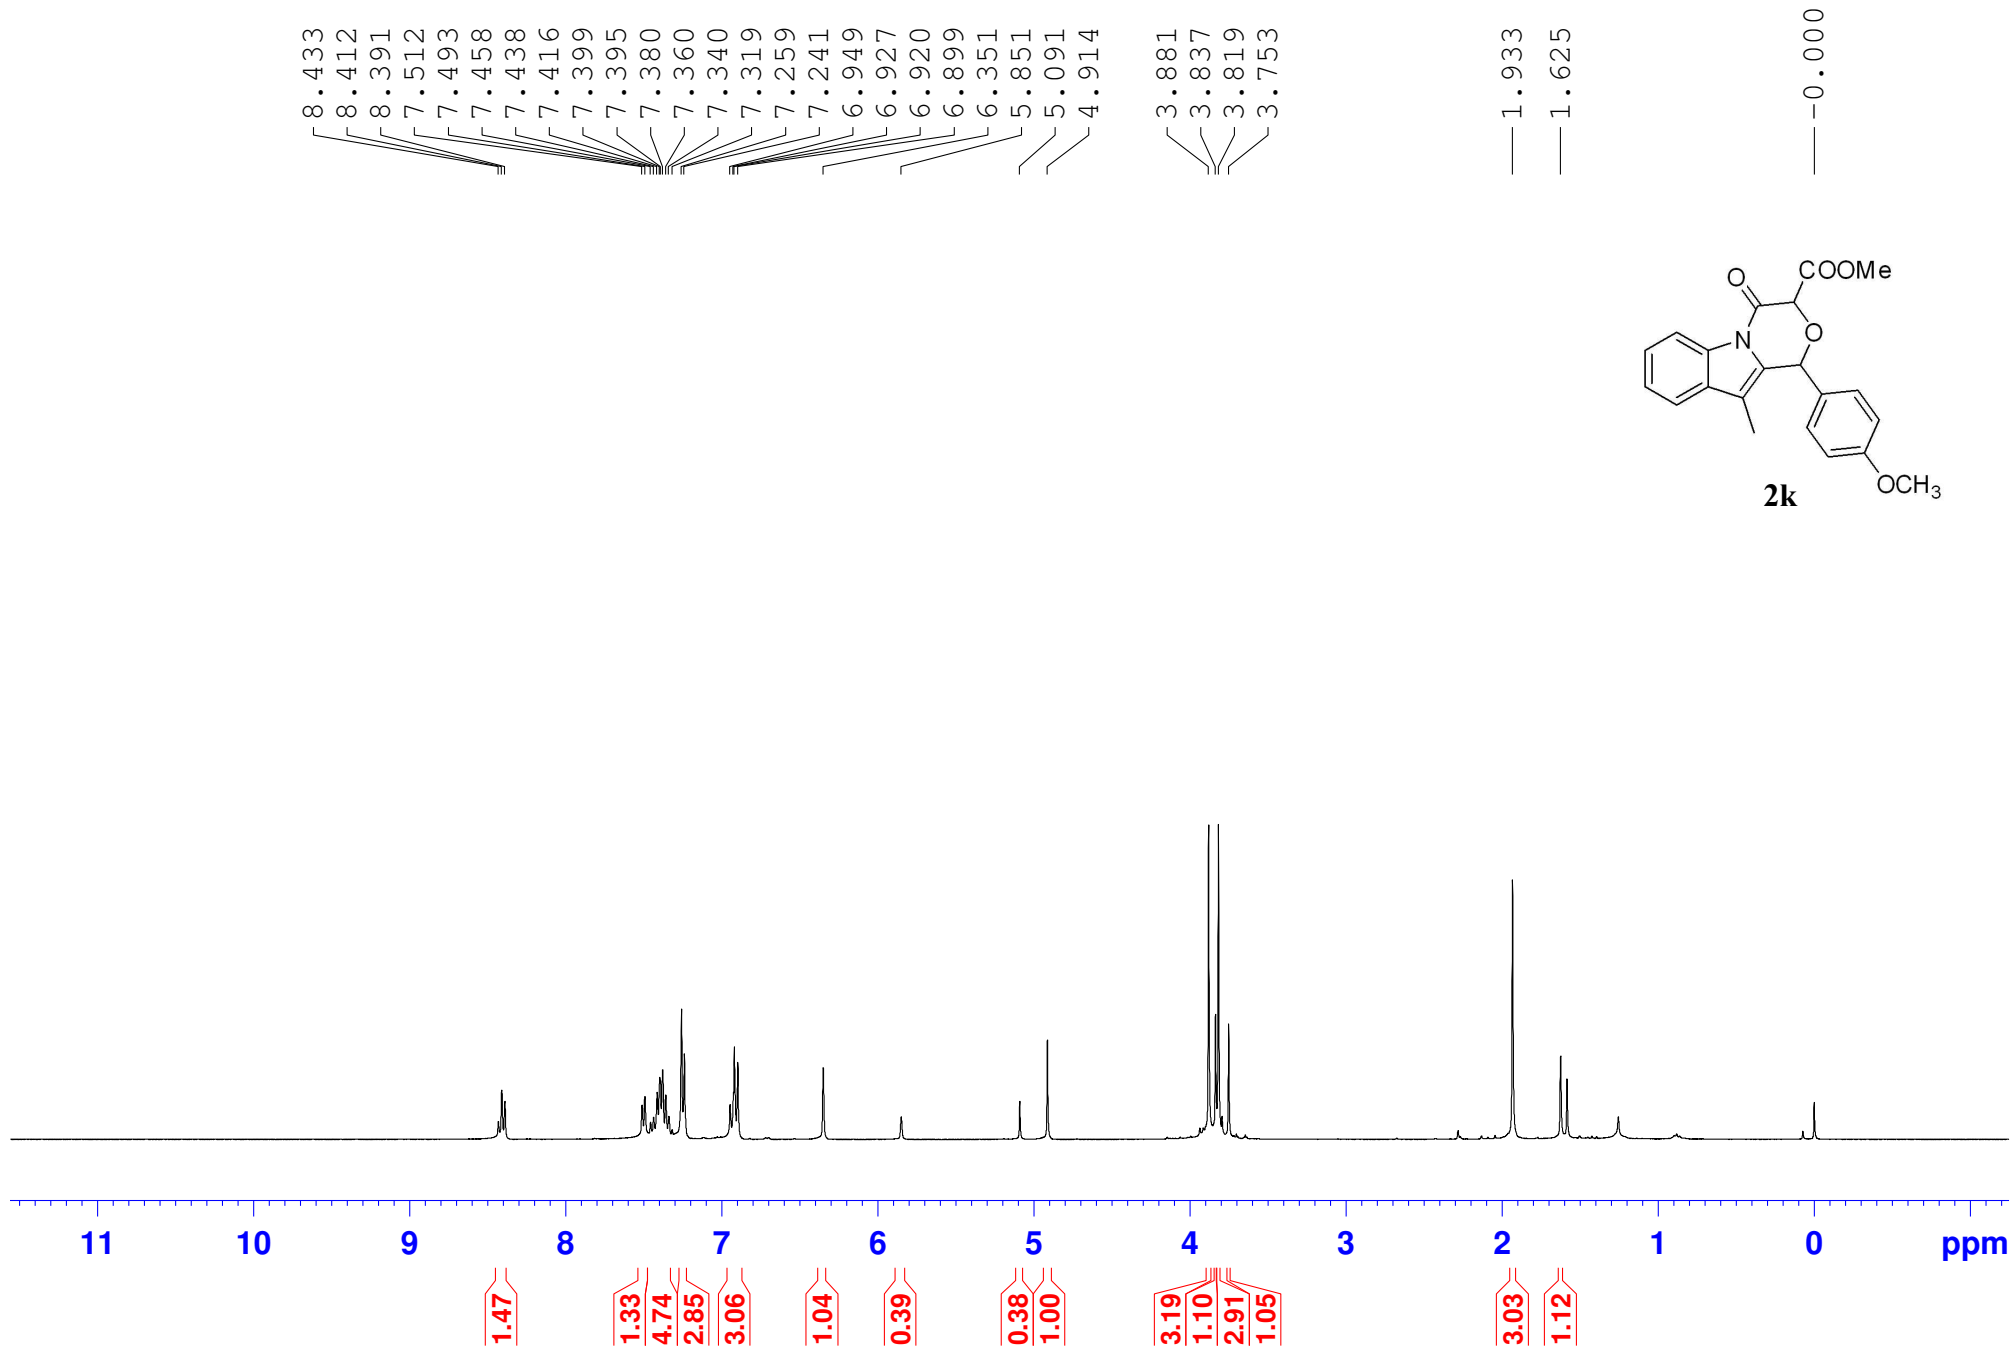

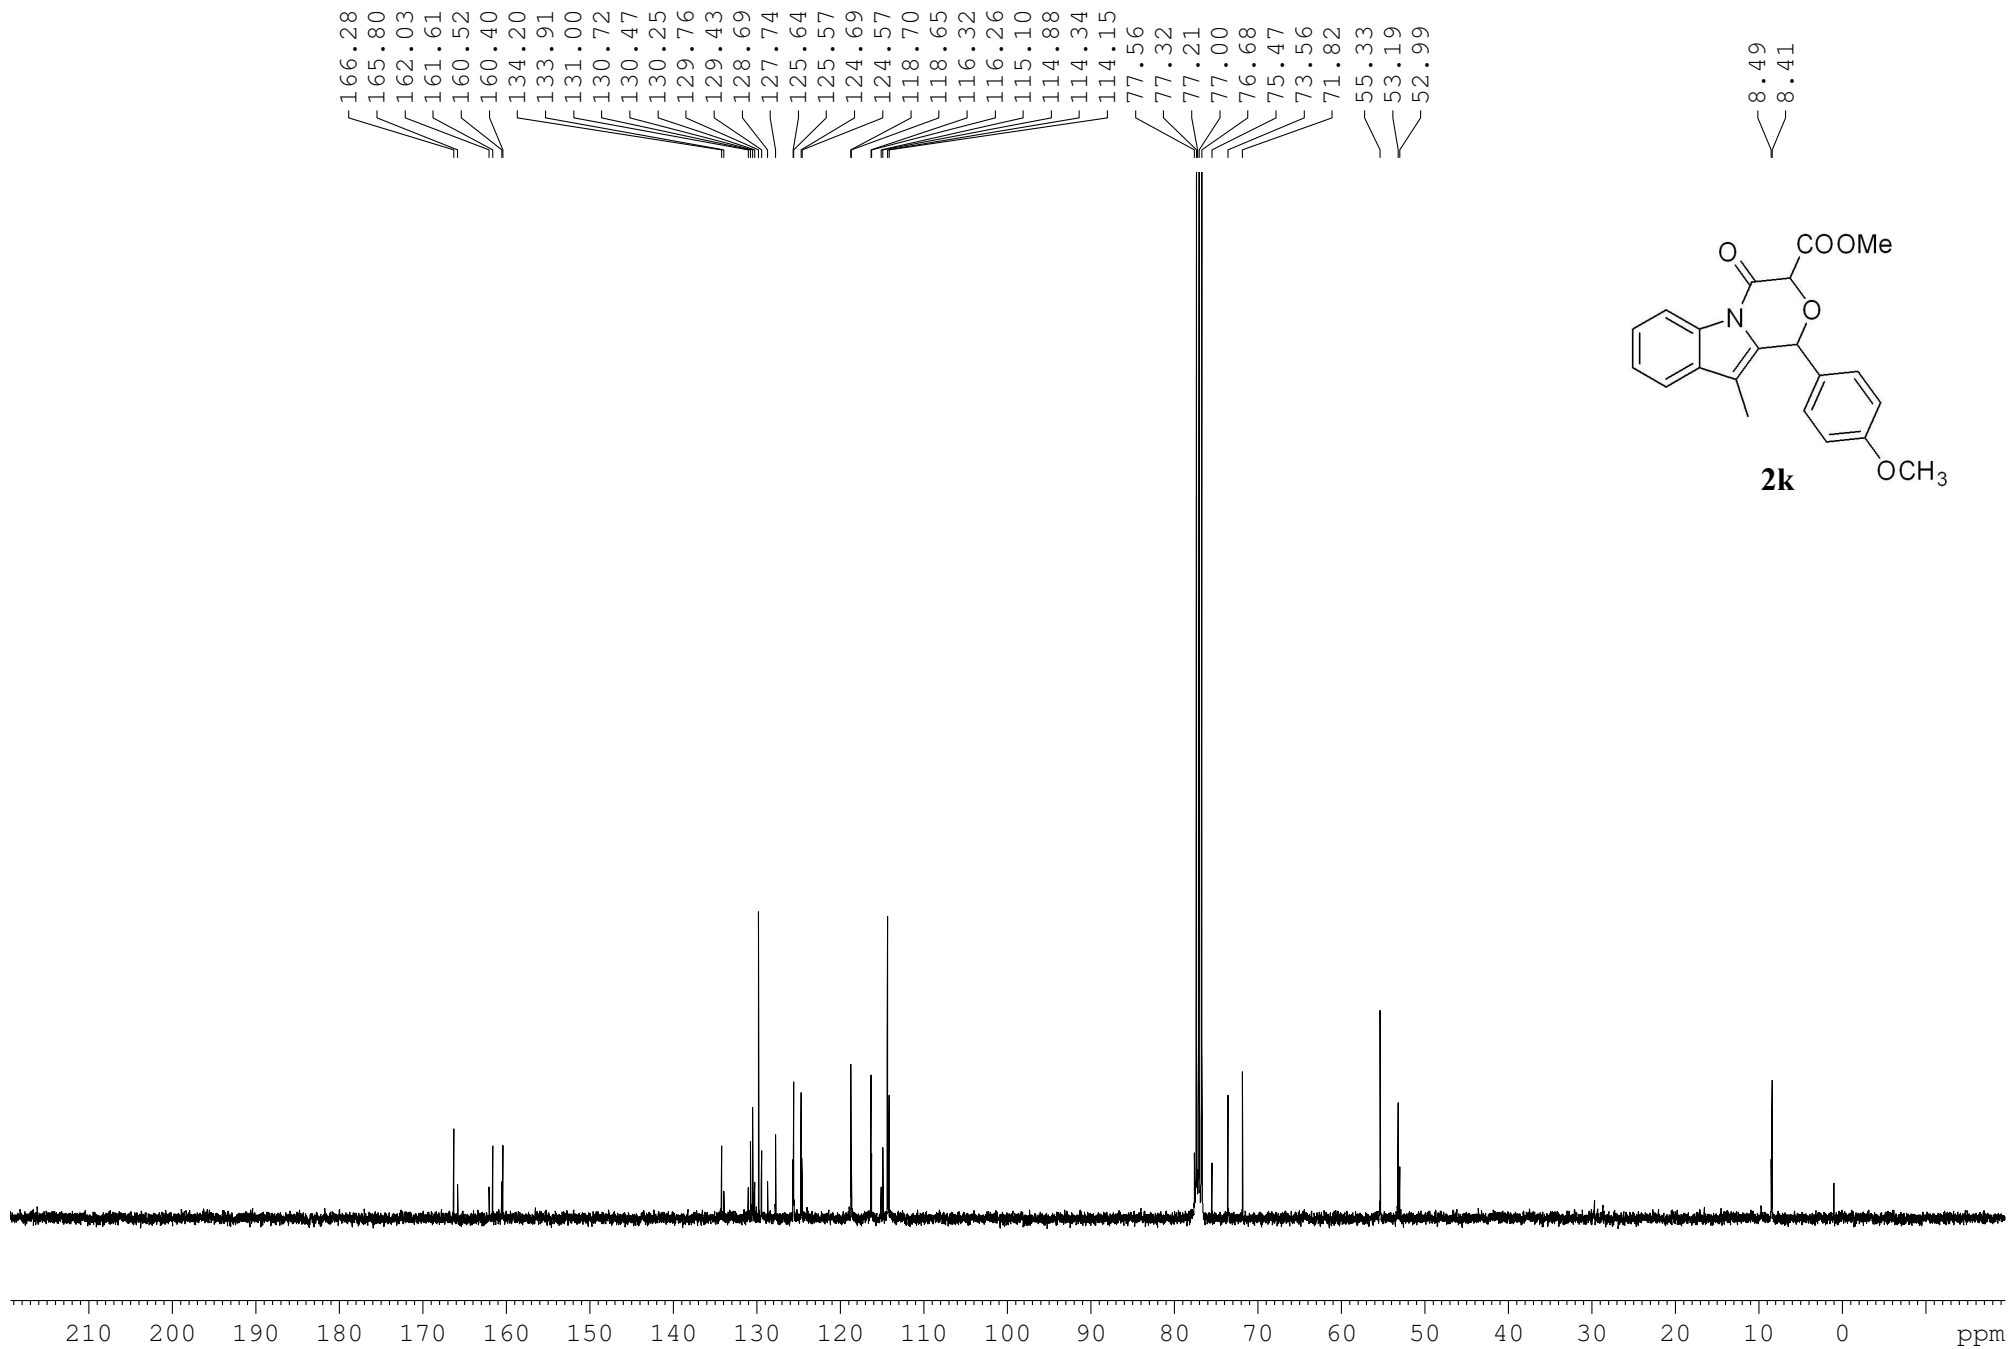



8.093  
8.088  
8.079  
7.508  
7.499  
7.493  
7.486  
7.387  
7.377  
7.369  
7.362  
7.354  
7.253  
7.076  
7.055  
6.886  
6.865

— 4.930

3.898  
3.801  
3.669

— 1.962

— 0.000

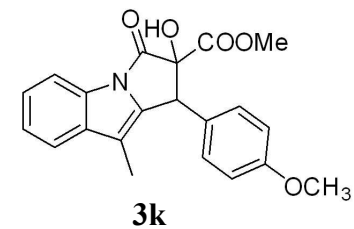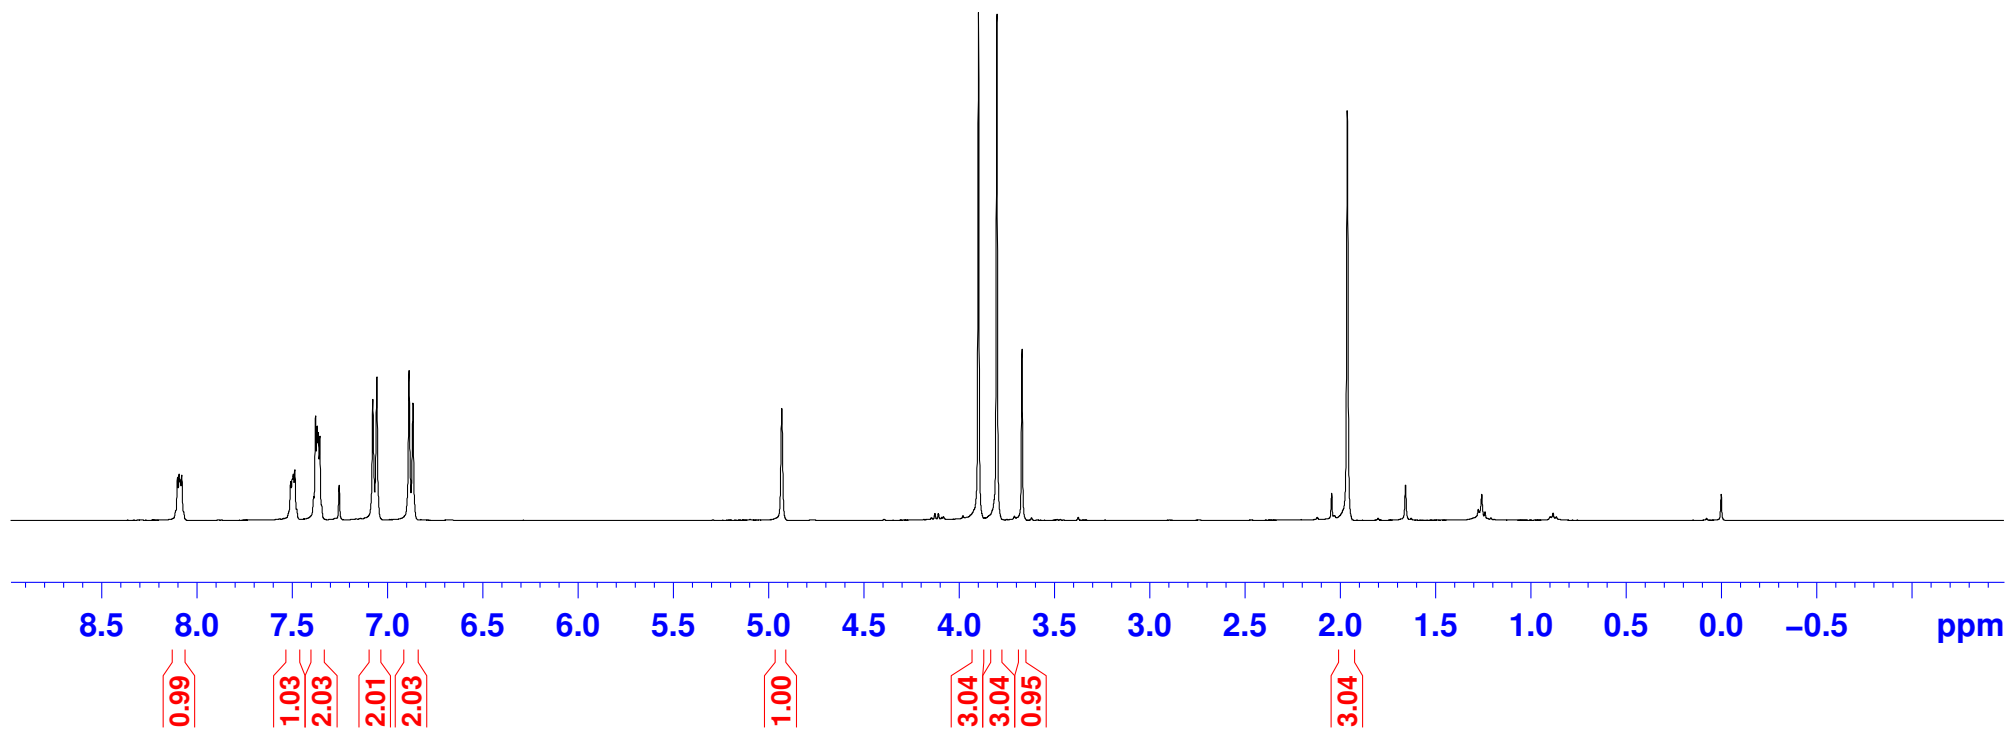

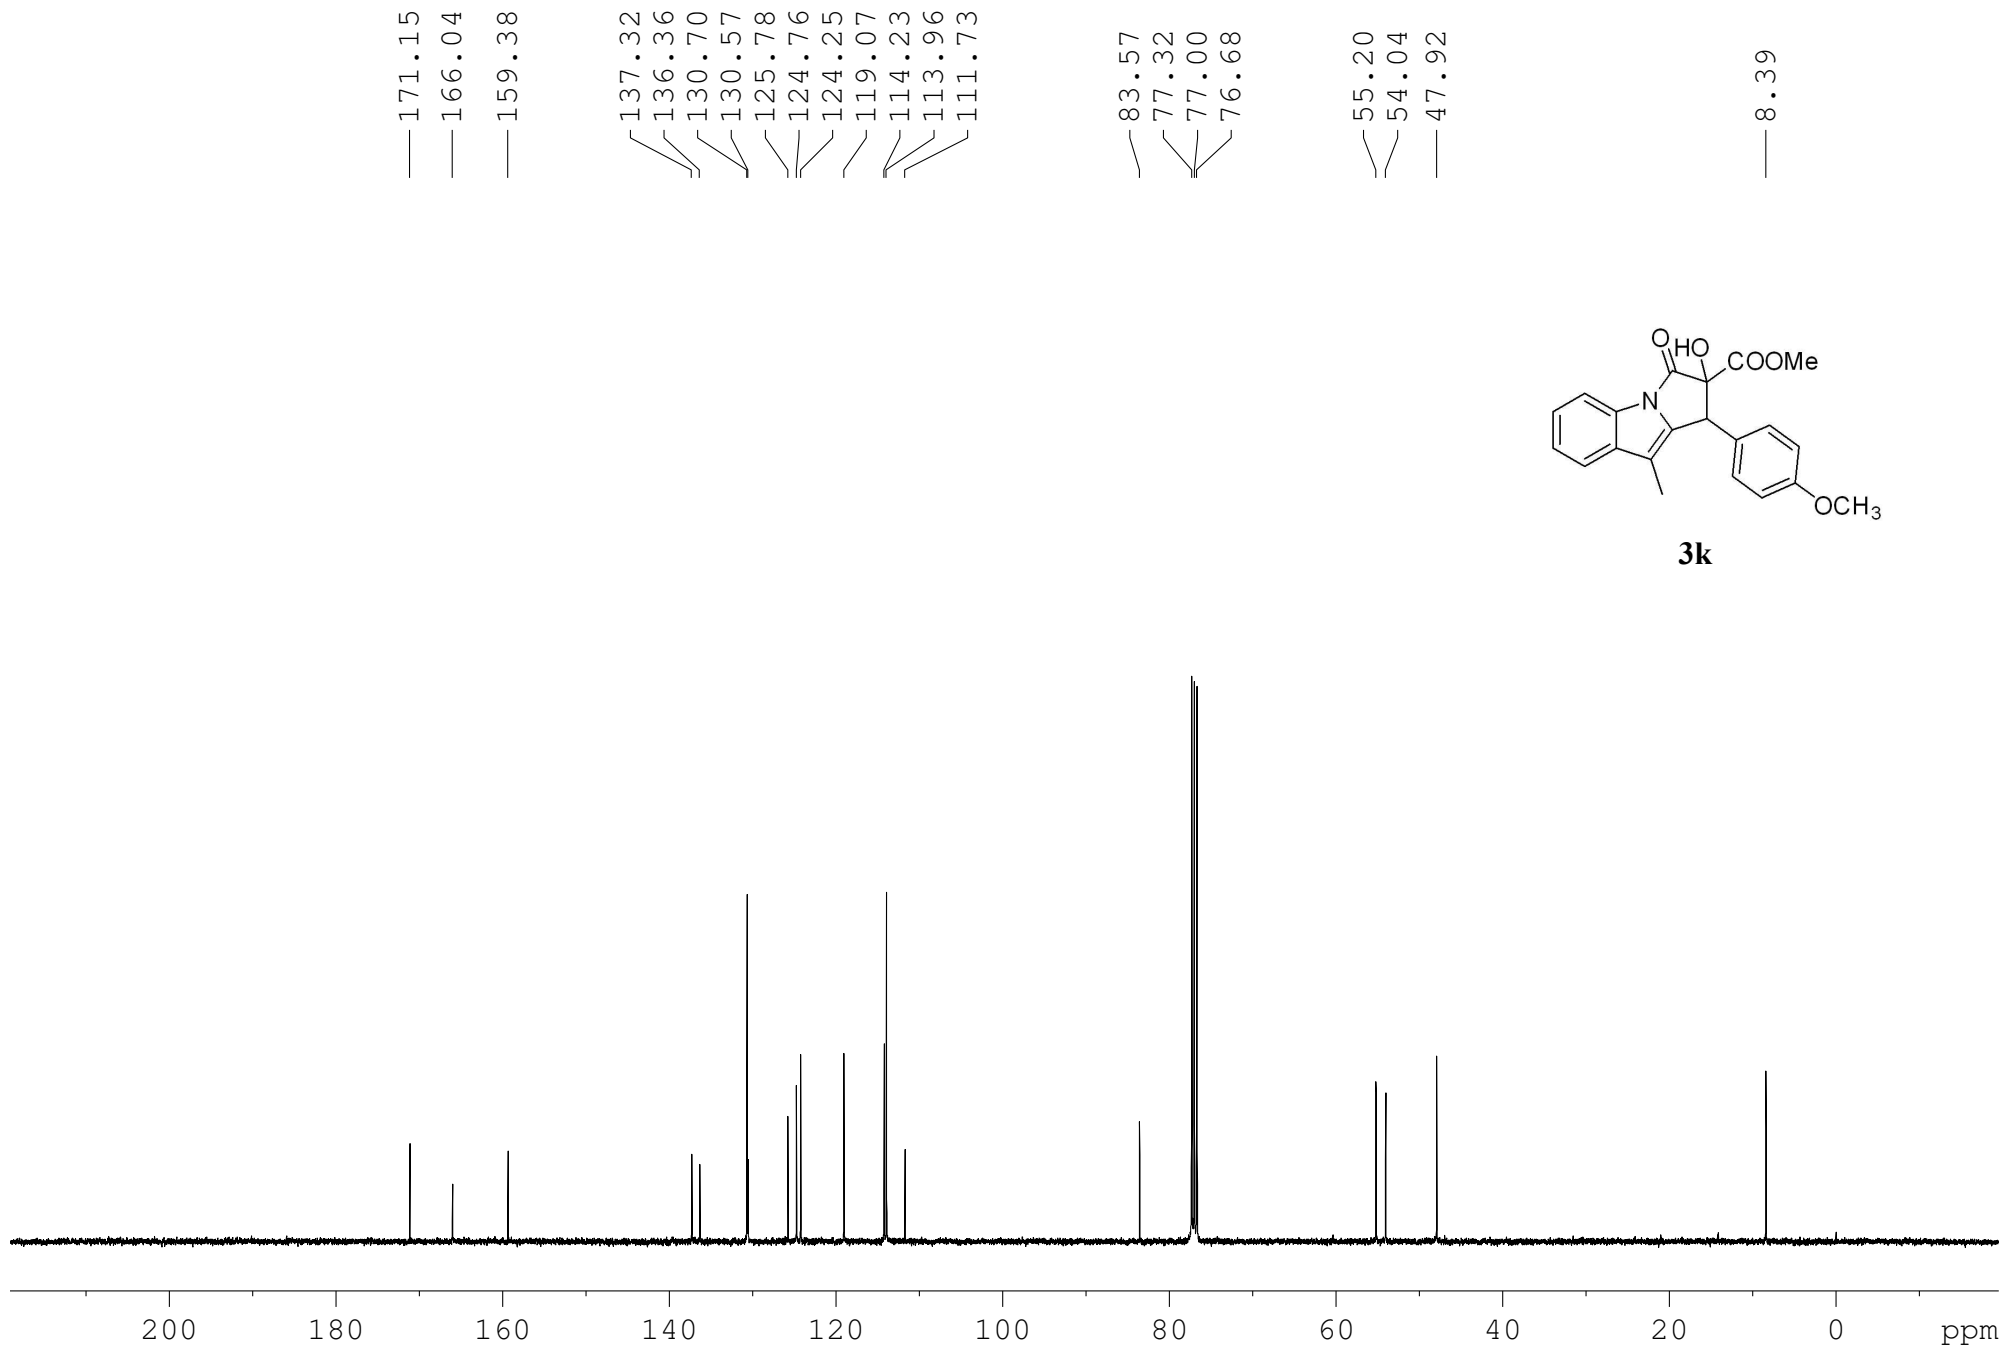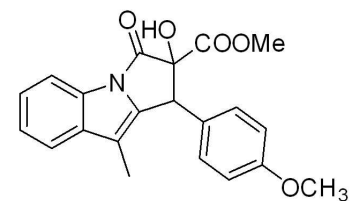

**3k**

w1-8-5-2hmbc

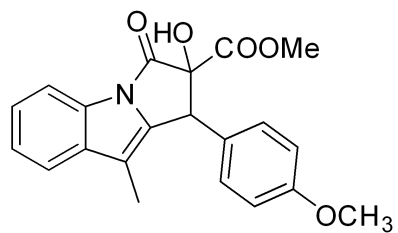

3k

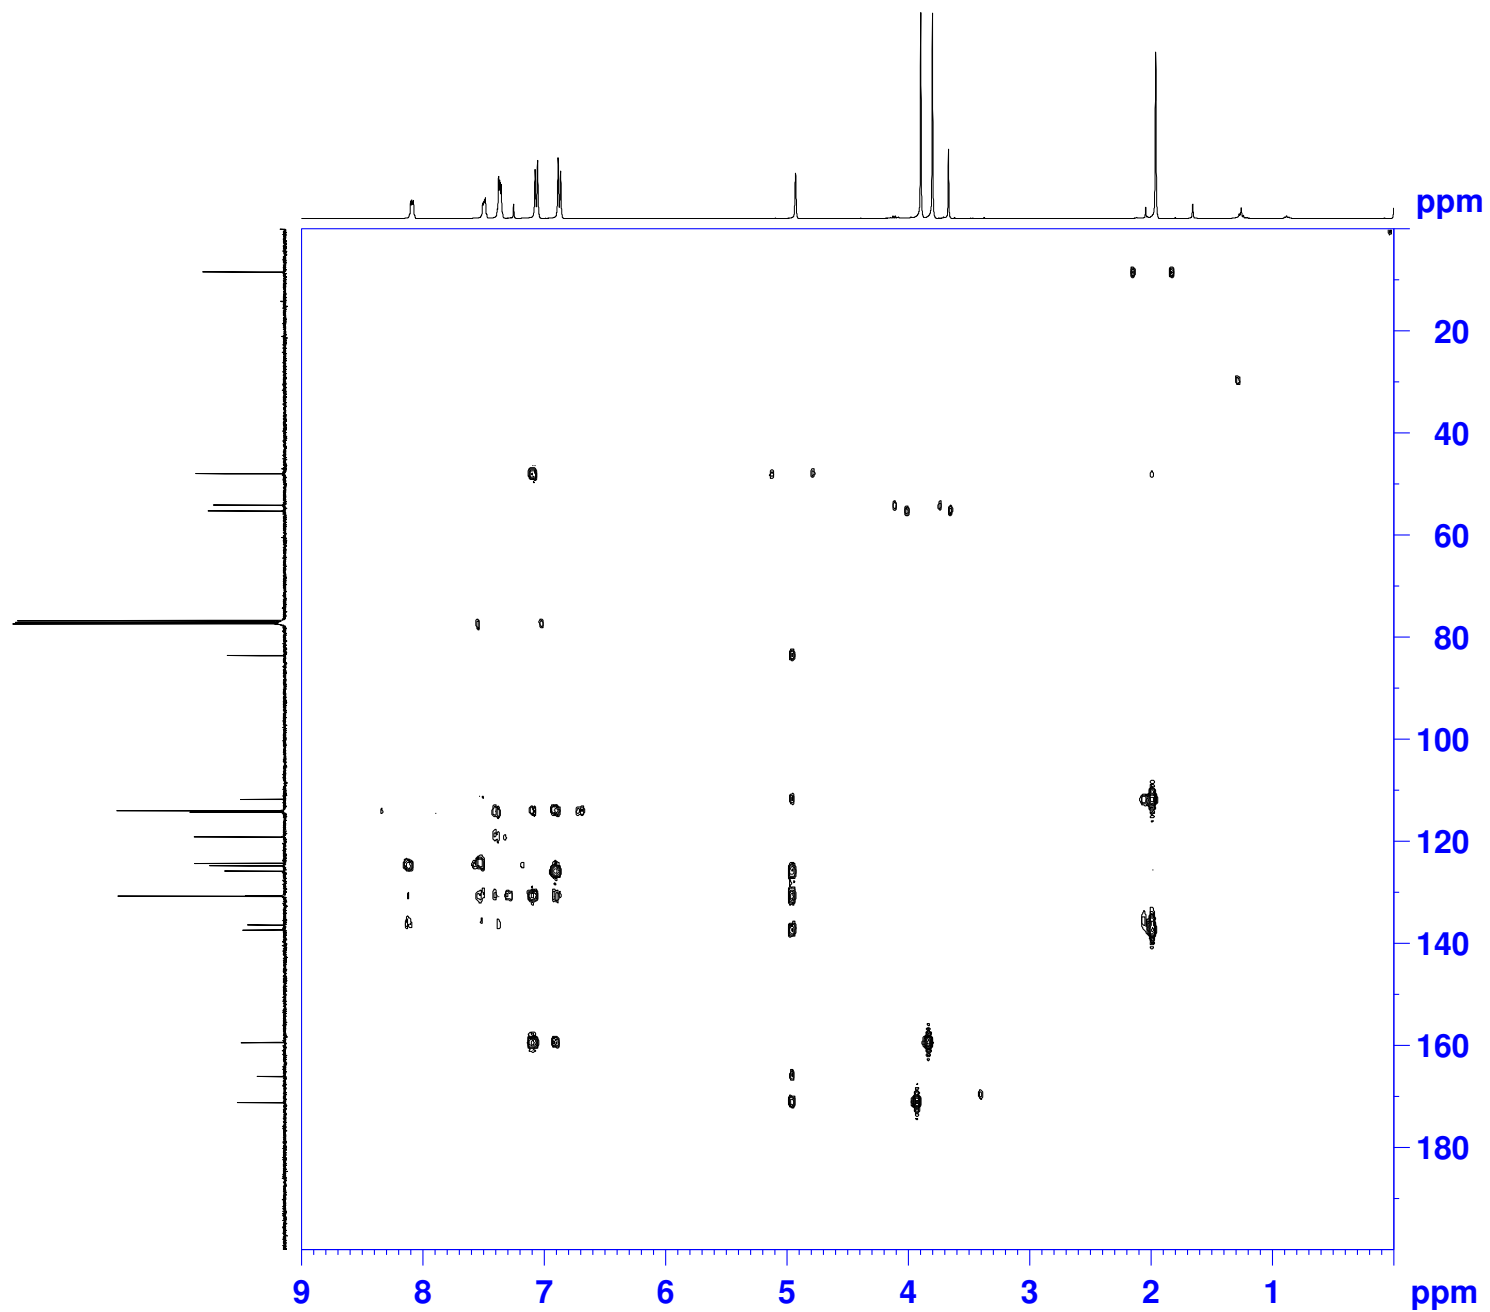

w1-8-5-2Hsqc

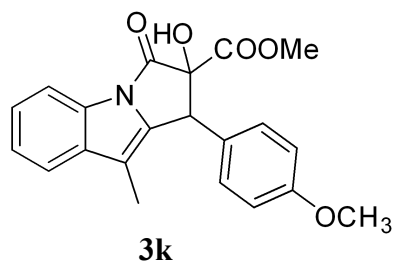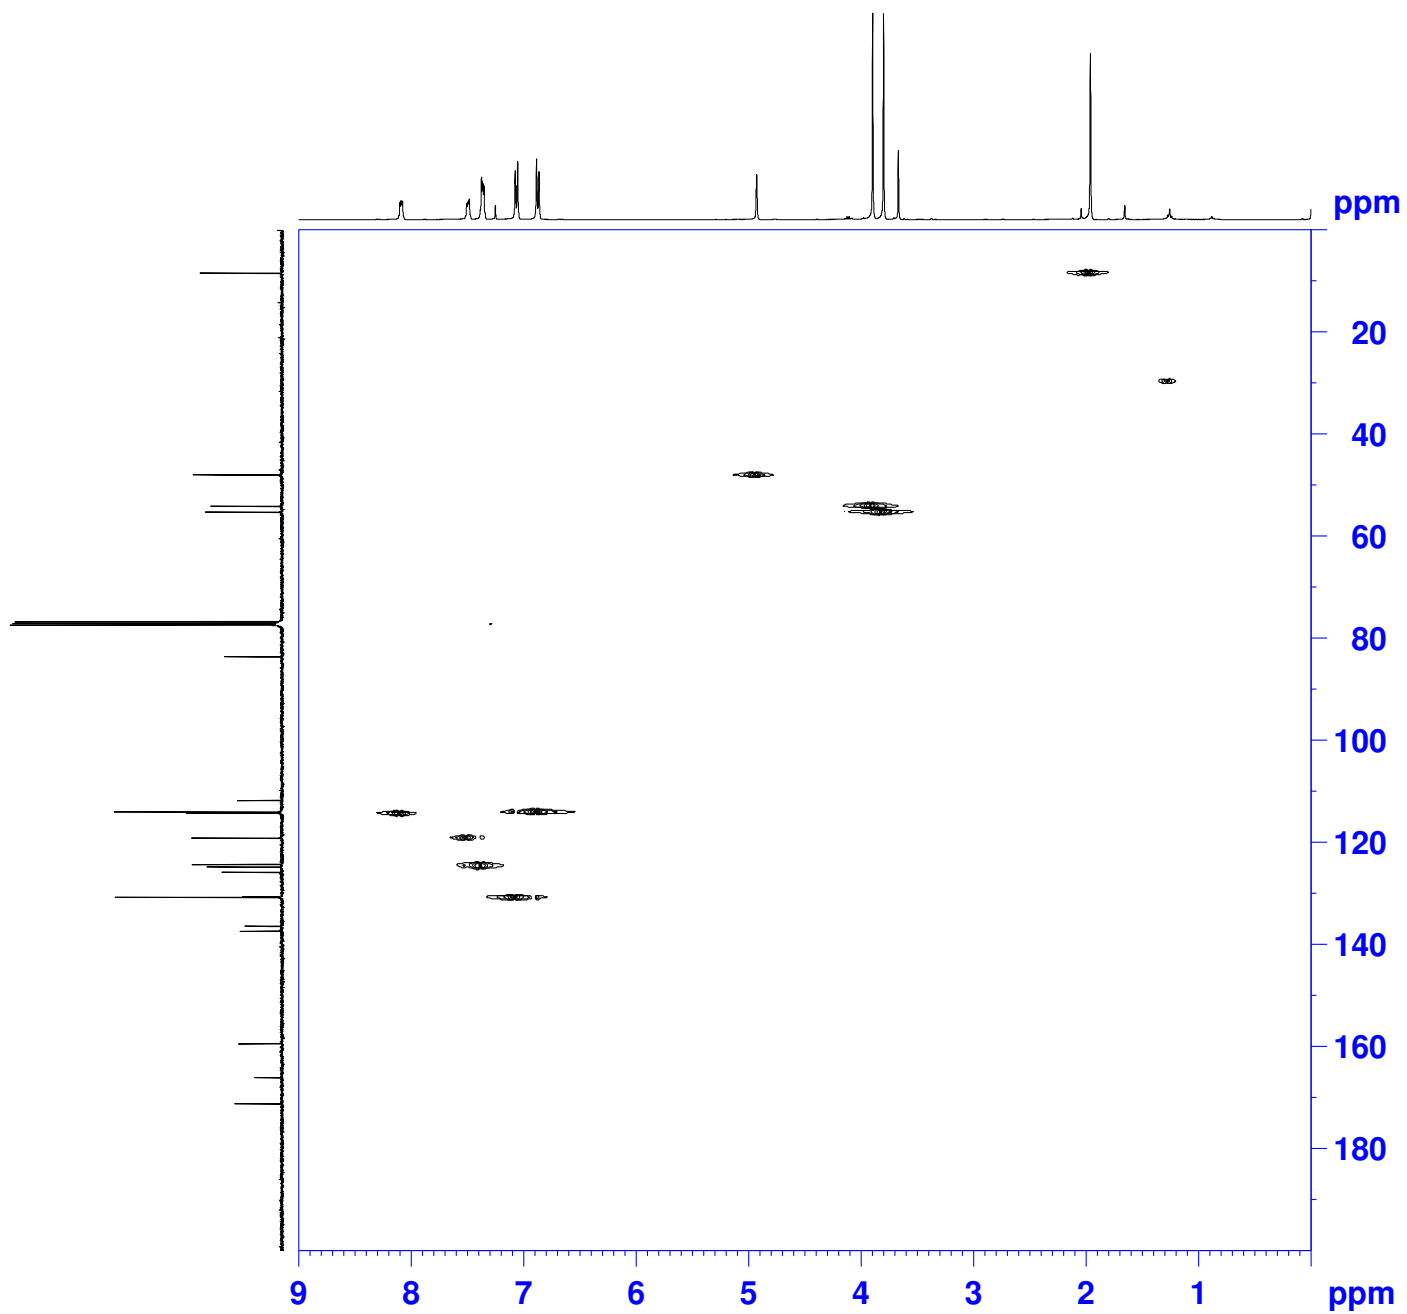

7.693  
7.676  
7.671  
7.660  
7.640  
7.506  
7.503  
7.487  
7.484  
7.467  
7.447  
7.420  
7.399  
7.380  
7.372  
7.359  
7.343  
7.325  
7.297  
7.291  
7.285  
7.273  
7.268  
7.254  
7.248  
7.233  
7.226  
7.216  
7.210  
6.813  
6.393  
6.380  
5.155  
5.054  
3.885  
3.786

1.744  
1.608

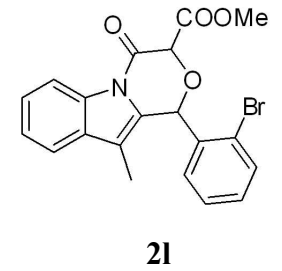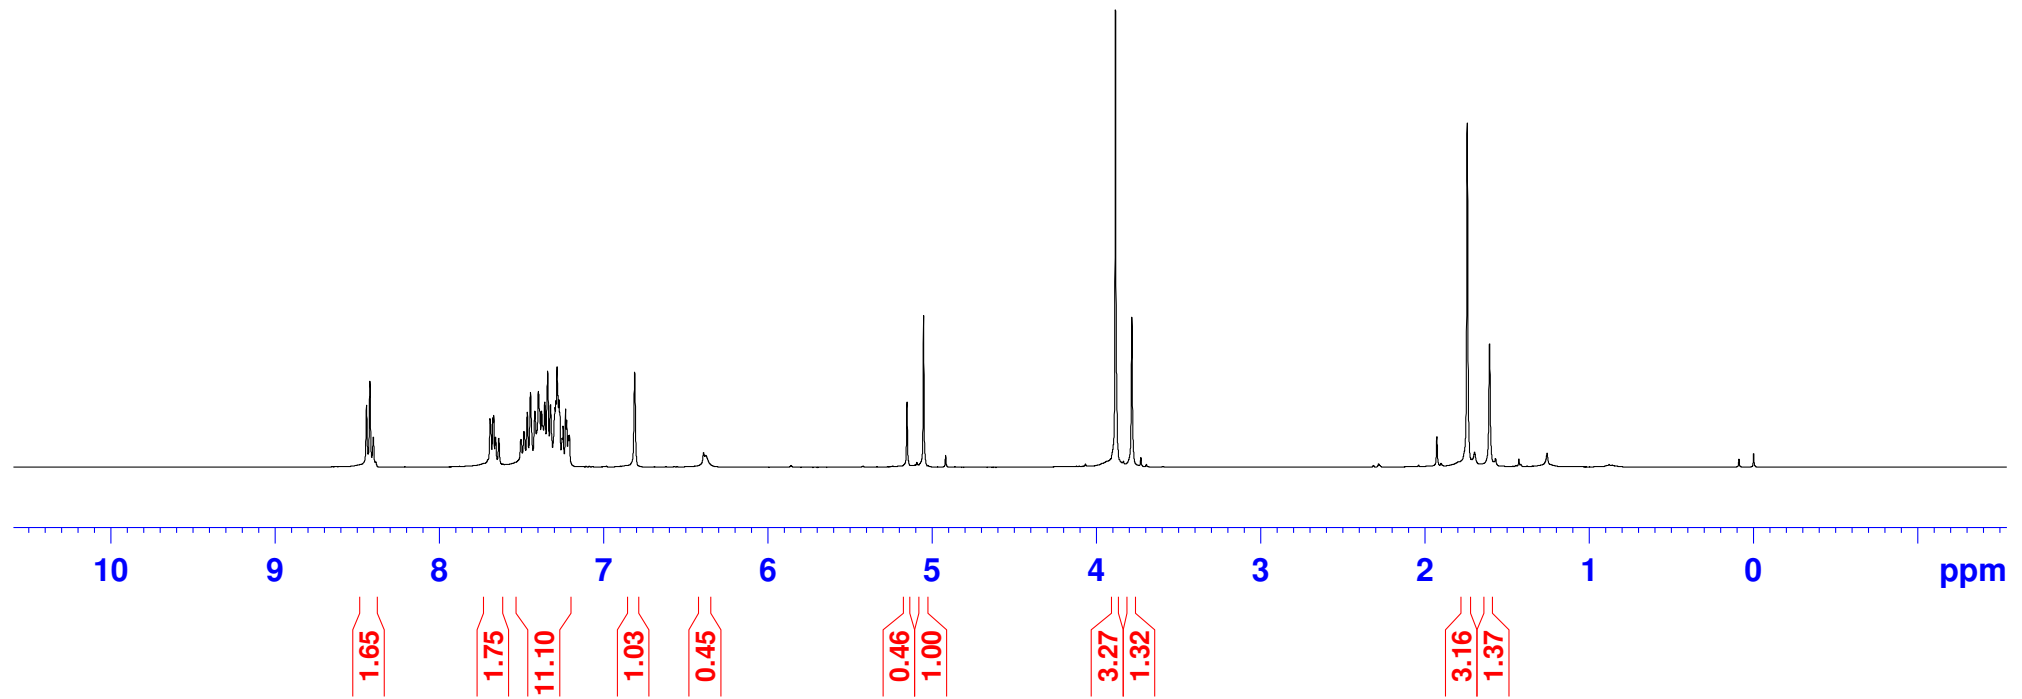

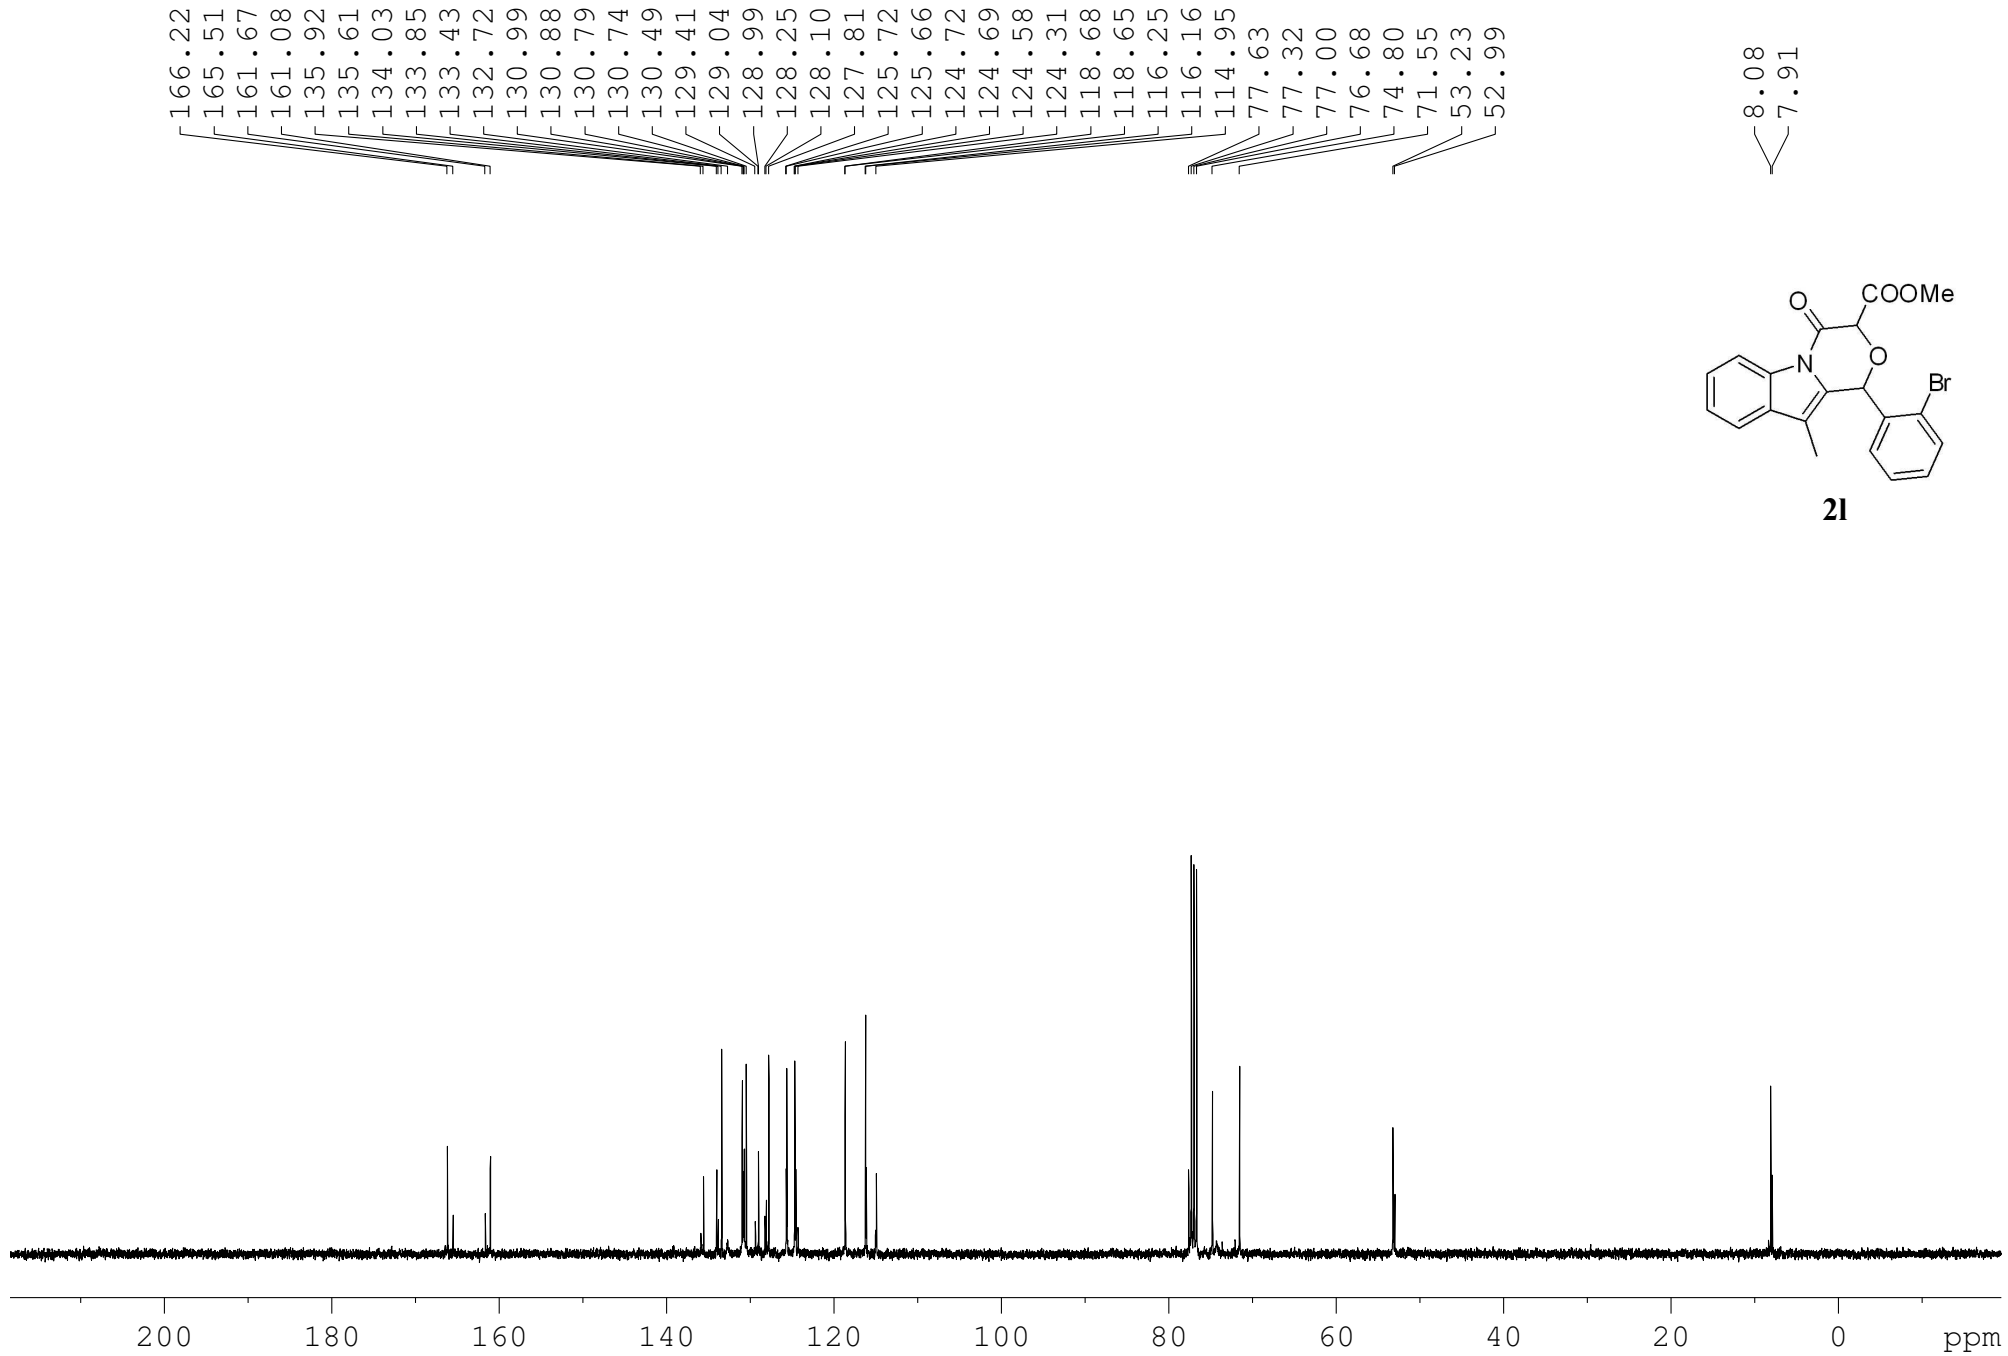

166.22  
165.51  
161.67  
161.08  
135.92  
135.61  
134.03  
133.85  
133.43  
132.72  
130.99  
130.88  
130.79  
130.74  
130.49  
129.41  
129.04  
128.99  
128.25  
128.10  
127.81  
125.72  
125.66  
124.72  
124.69  
124.58  
124.31  
118.68  
118.65  
116.25  
116.16  
114.95  
77.63  
77.32  
77.00  
76.68  
74.80  
71.55  
53.23  
52.99

8.08  
7.91

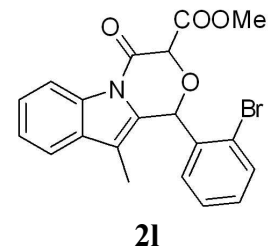

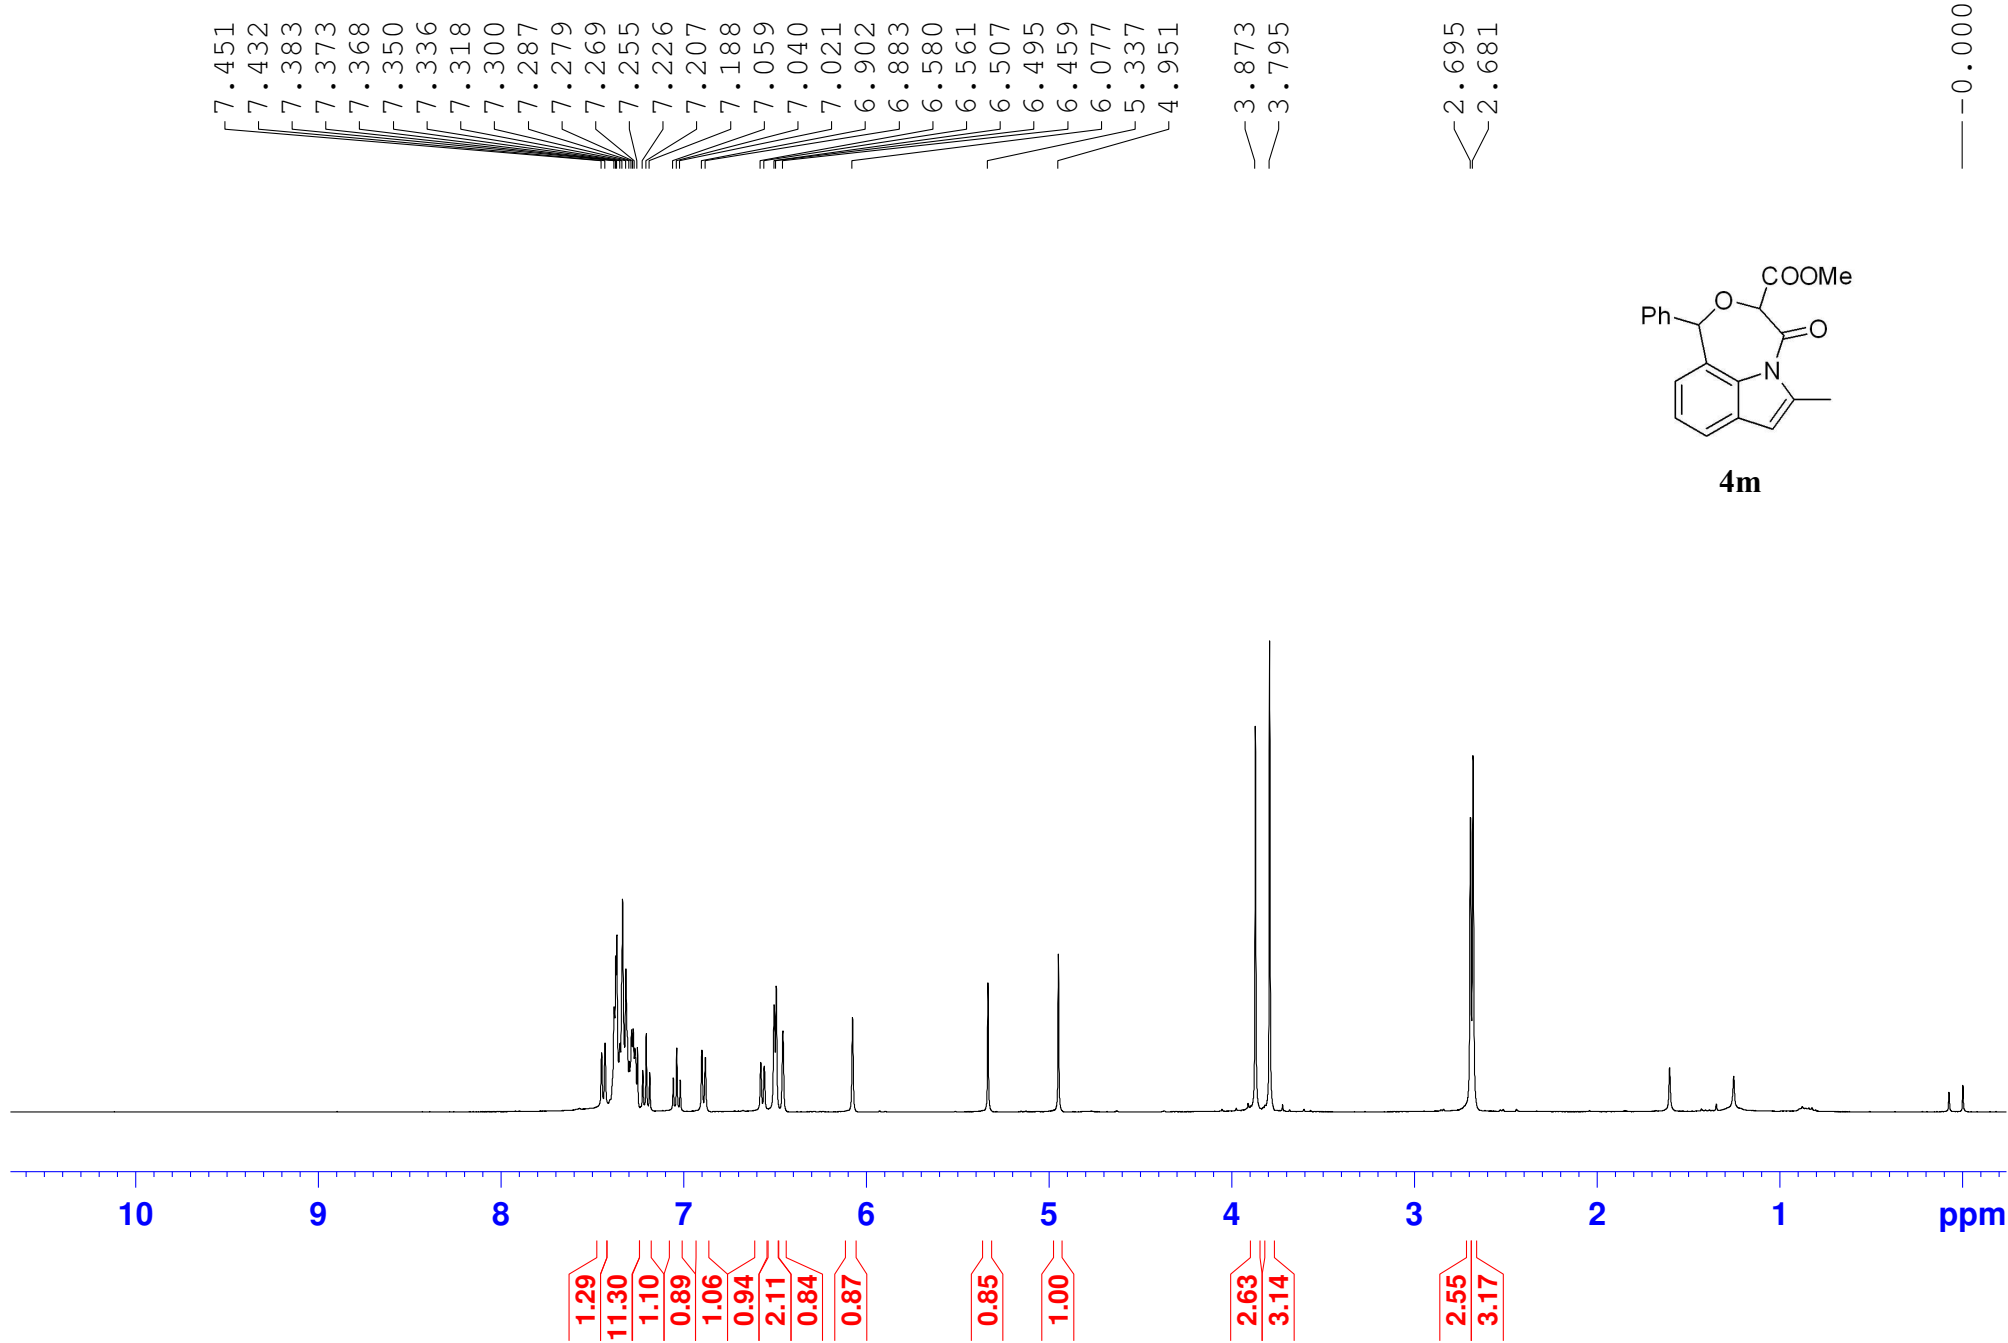

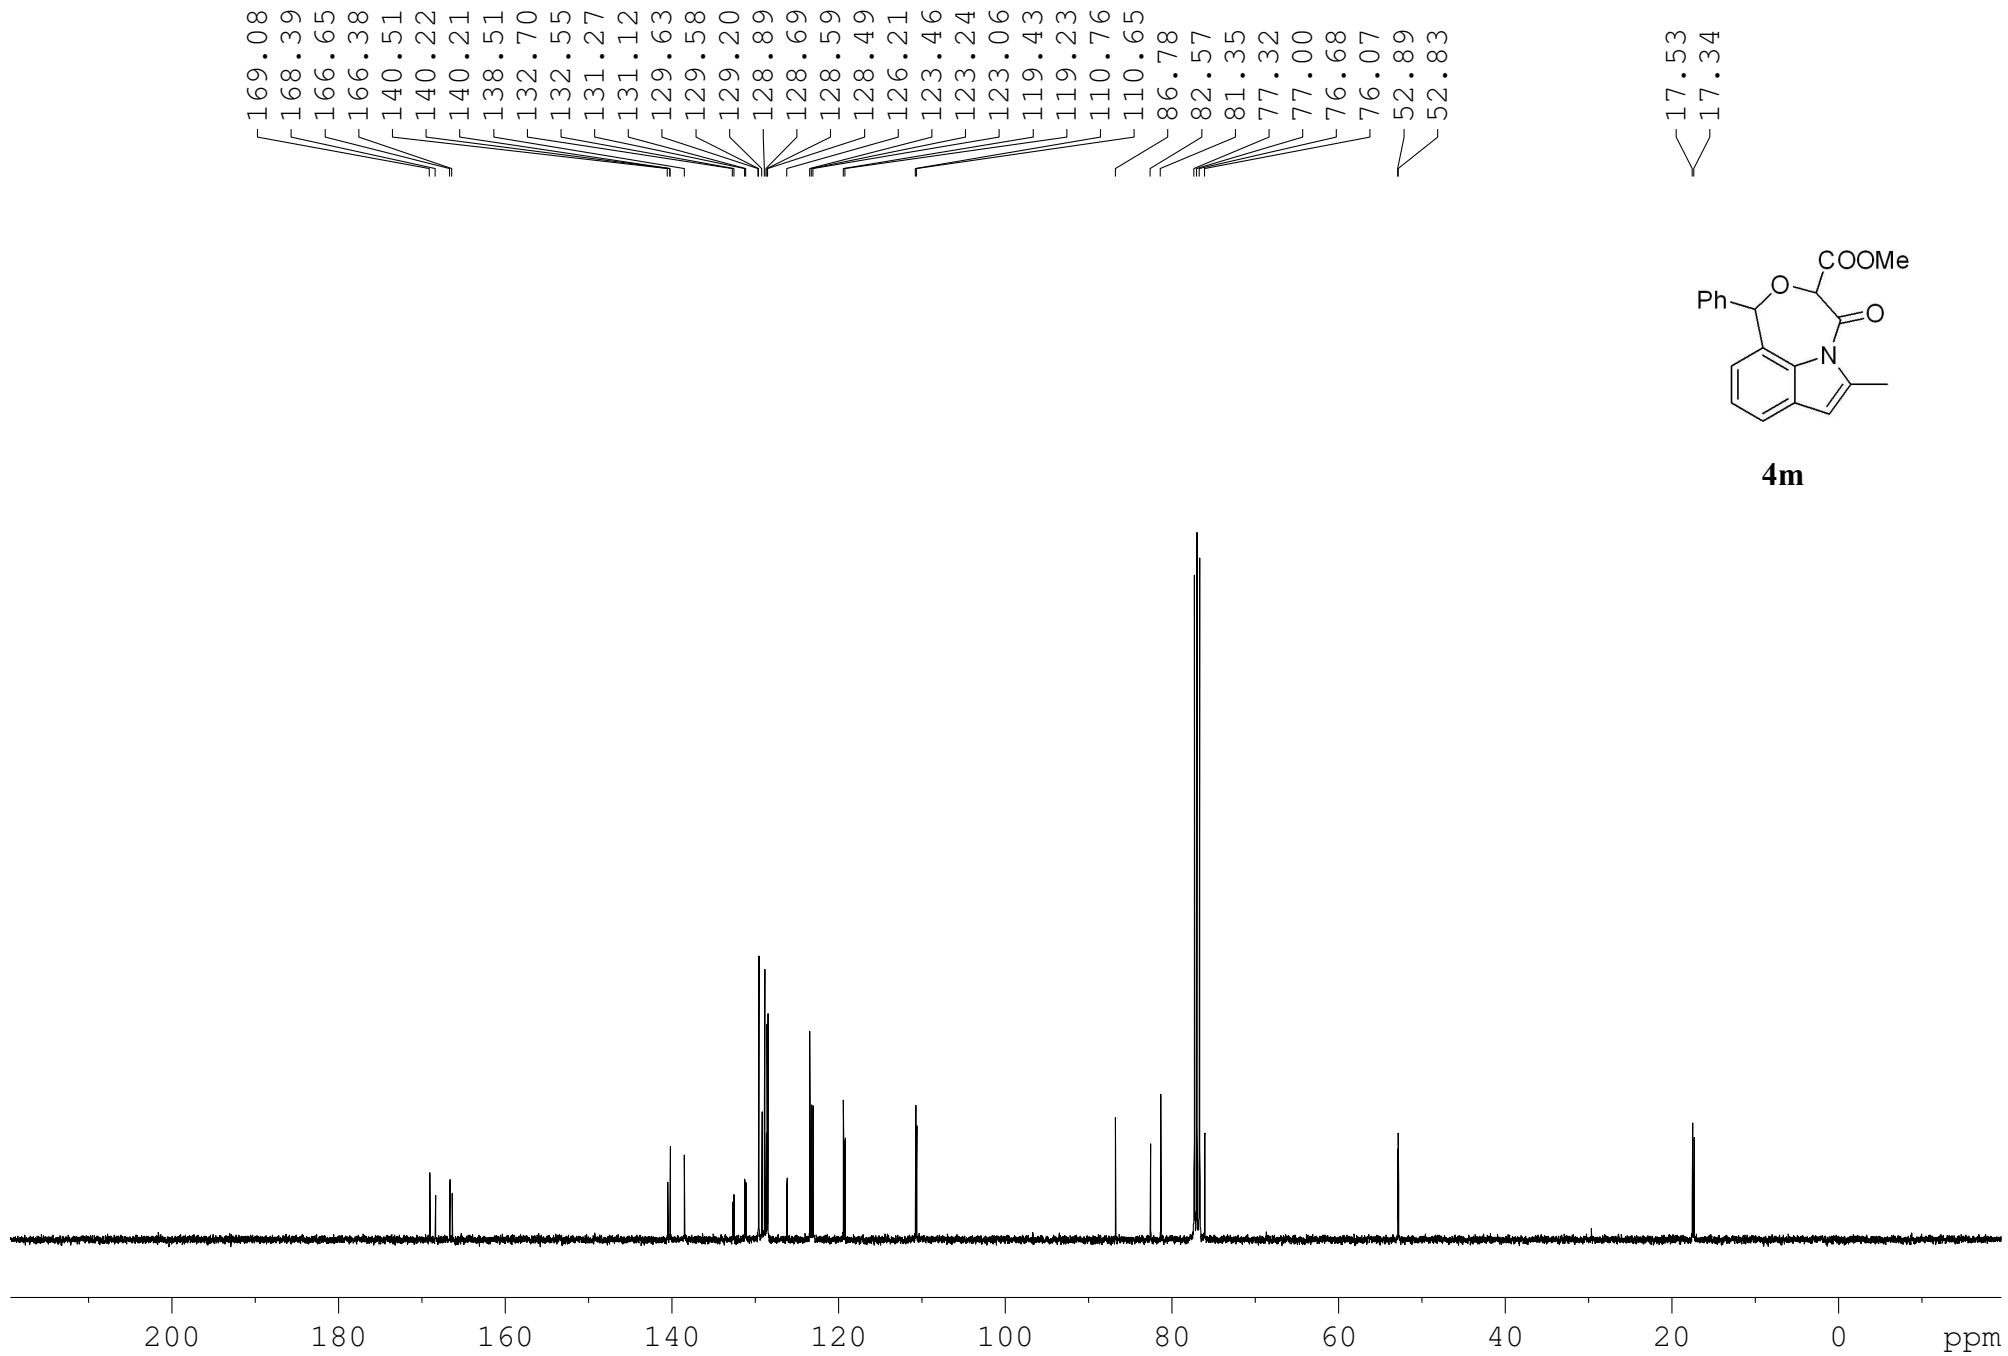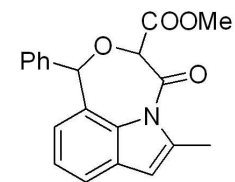

**4m**



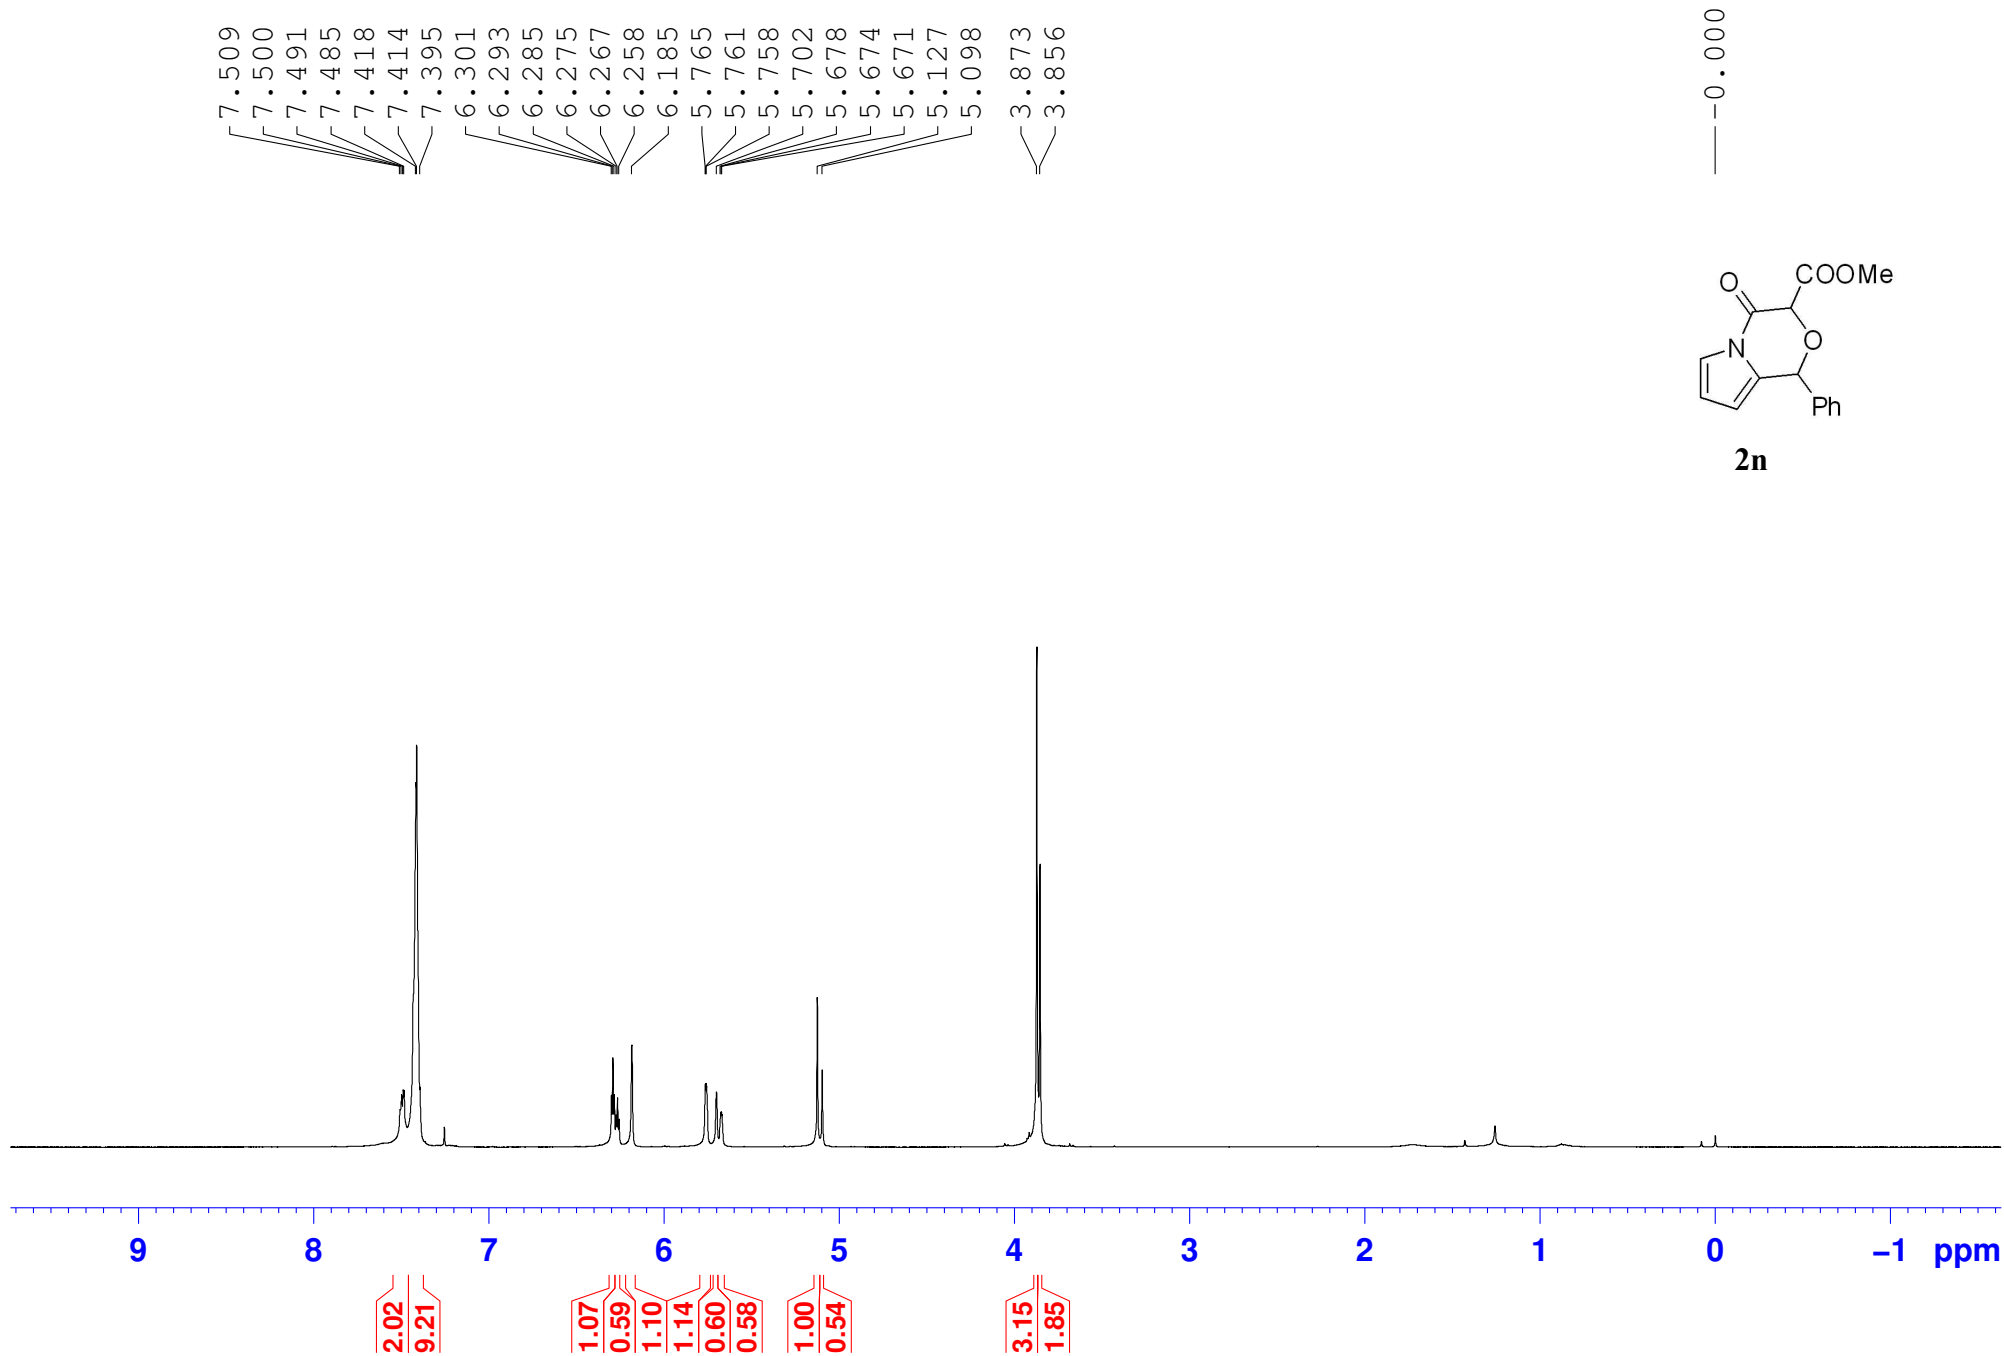

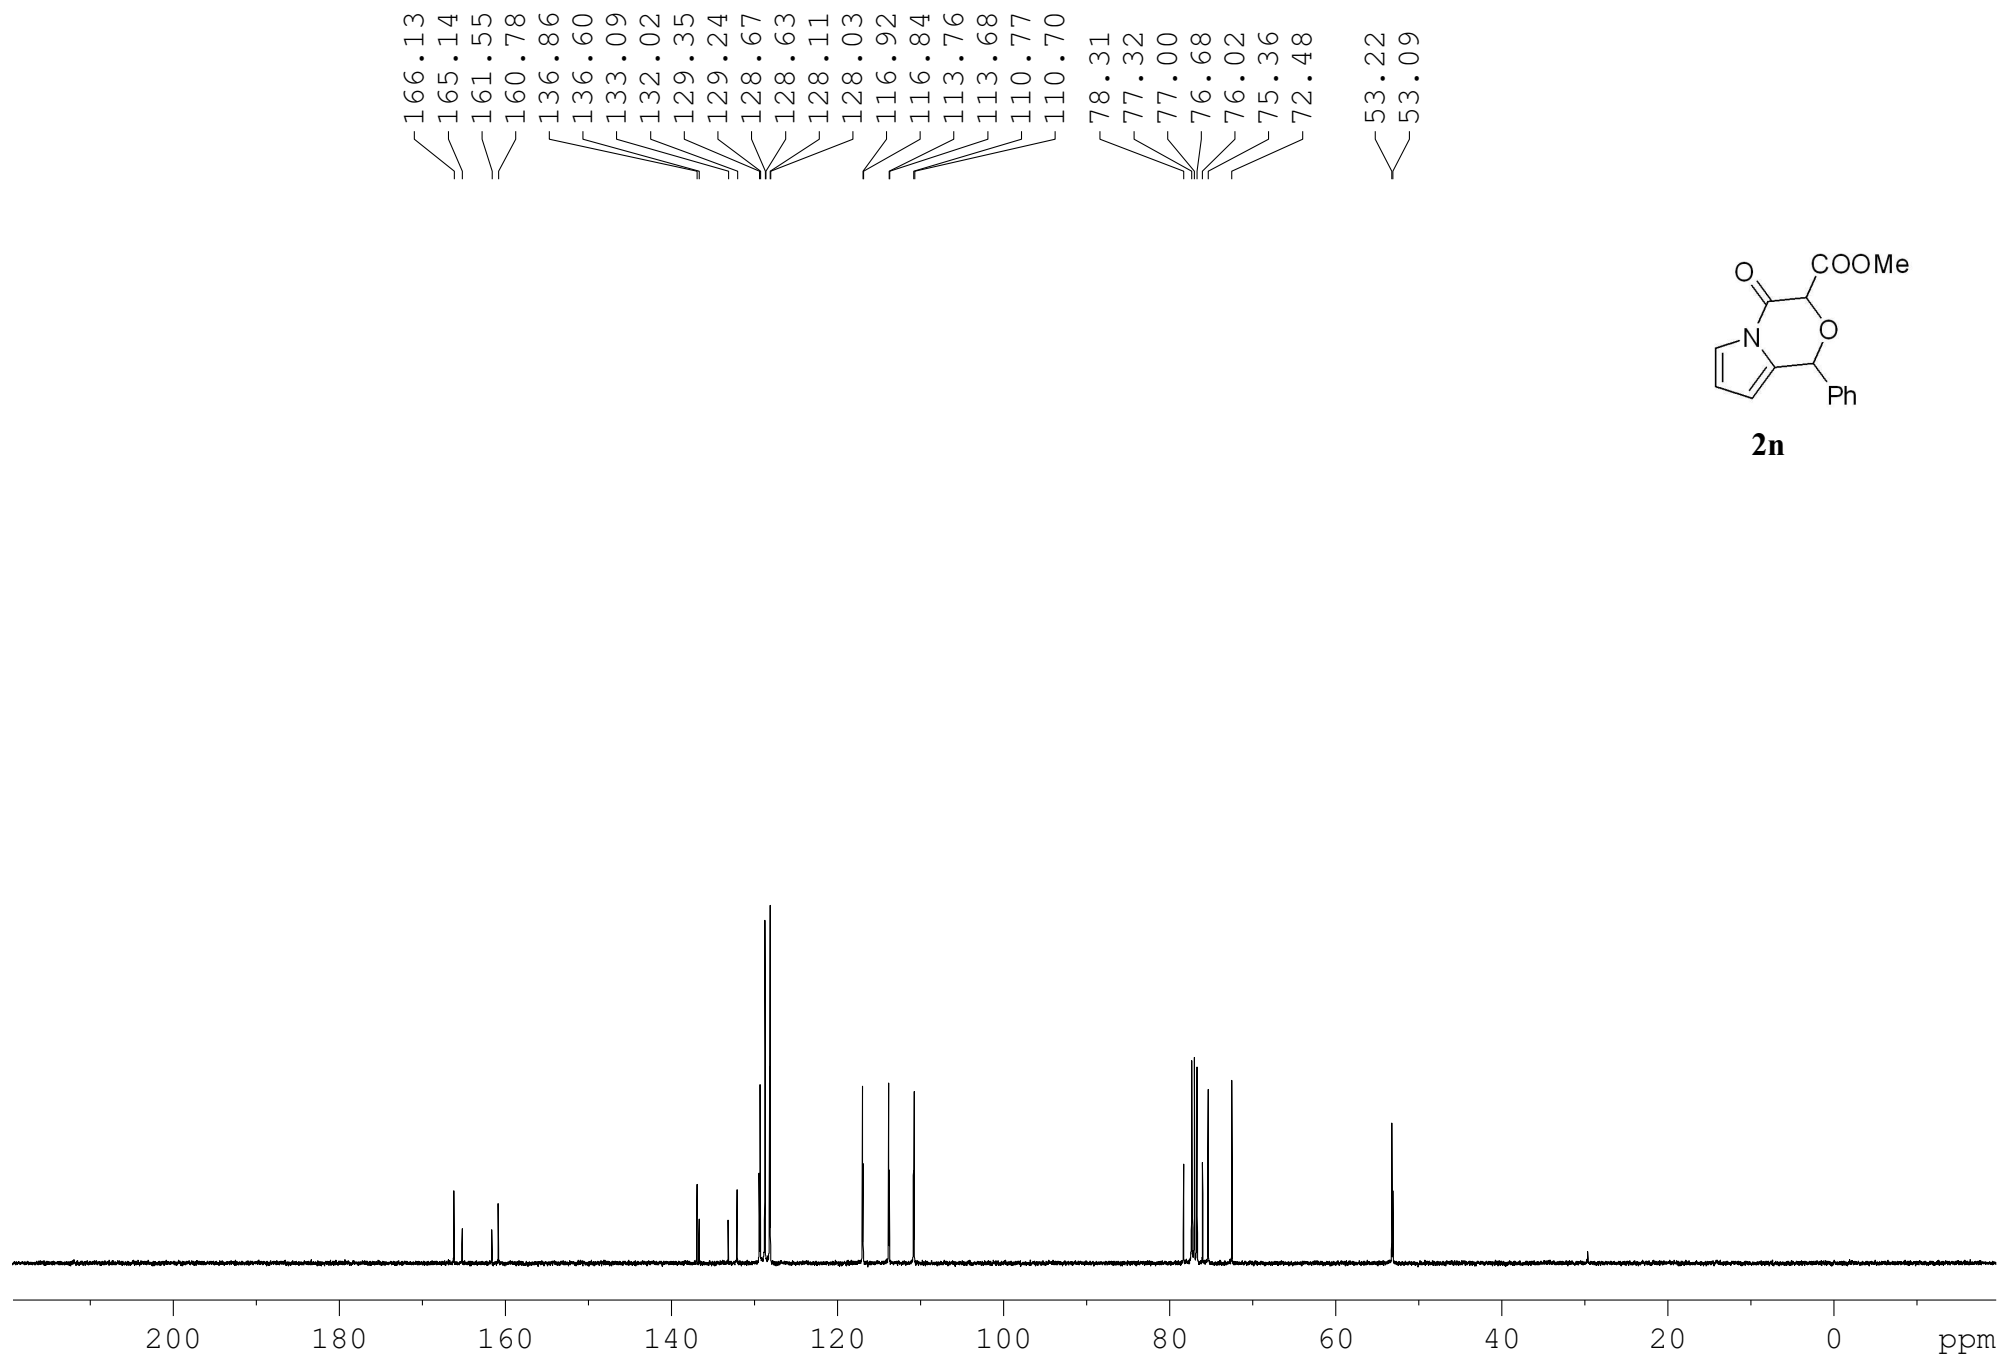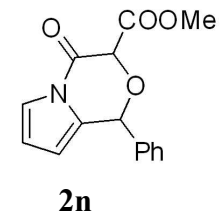

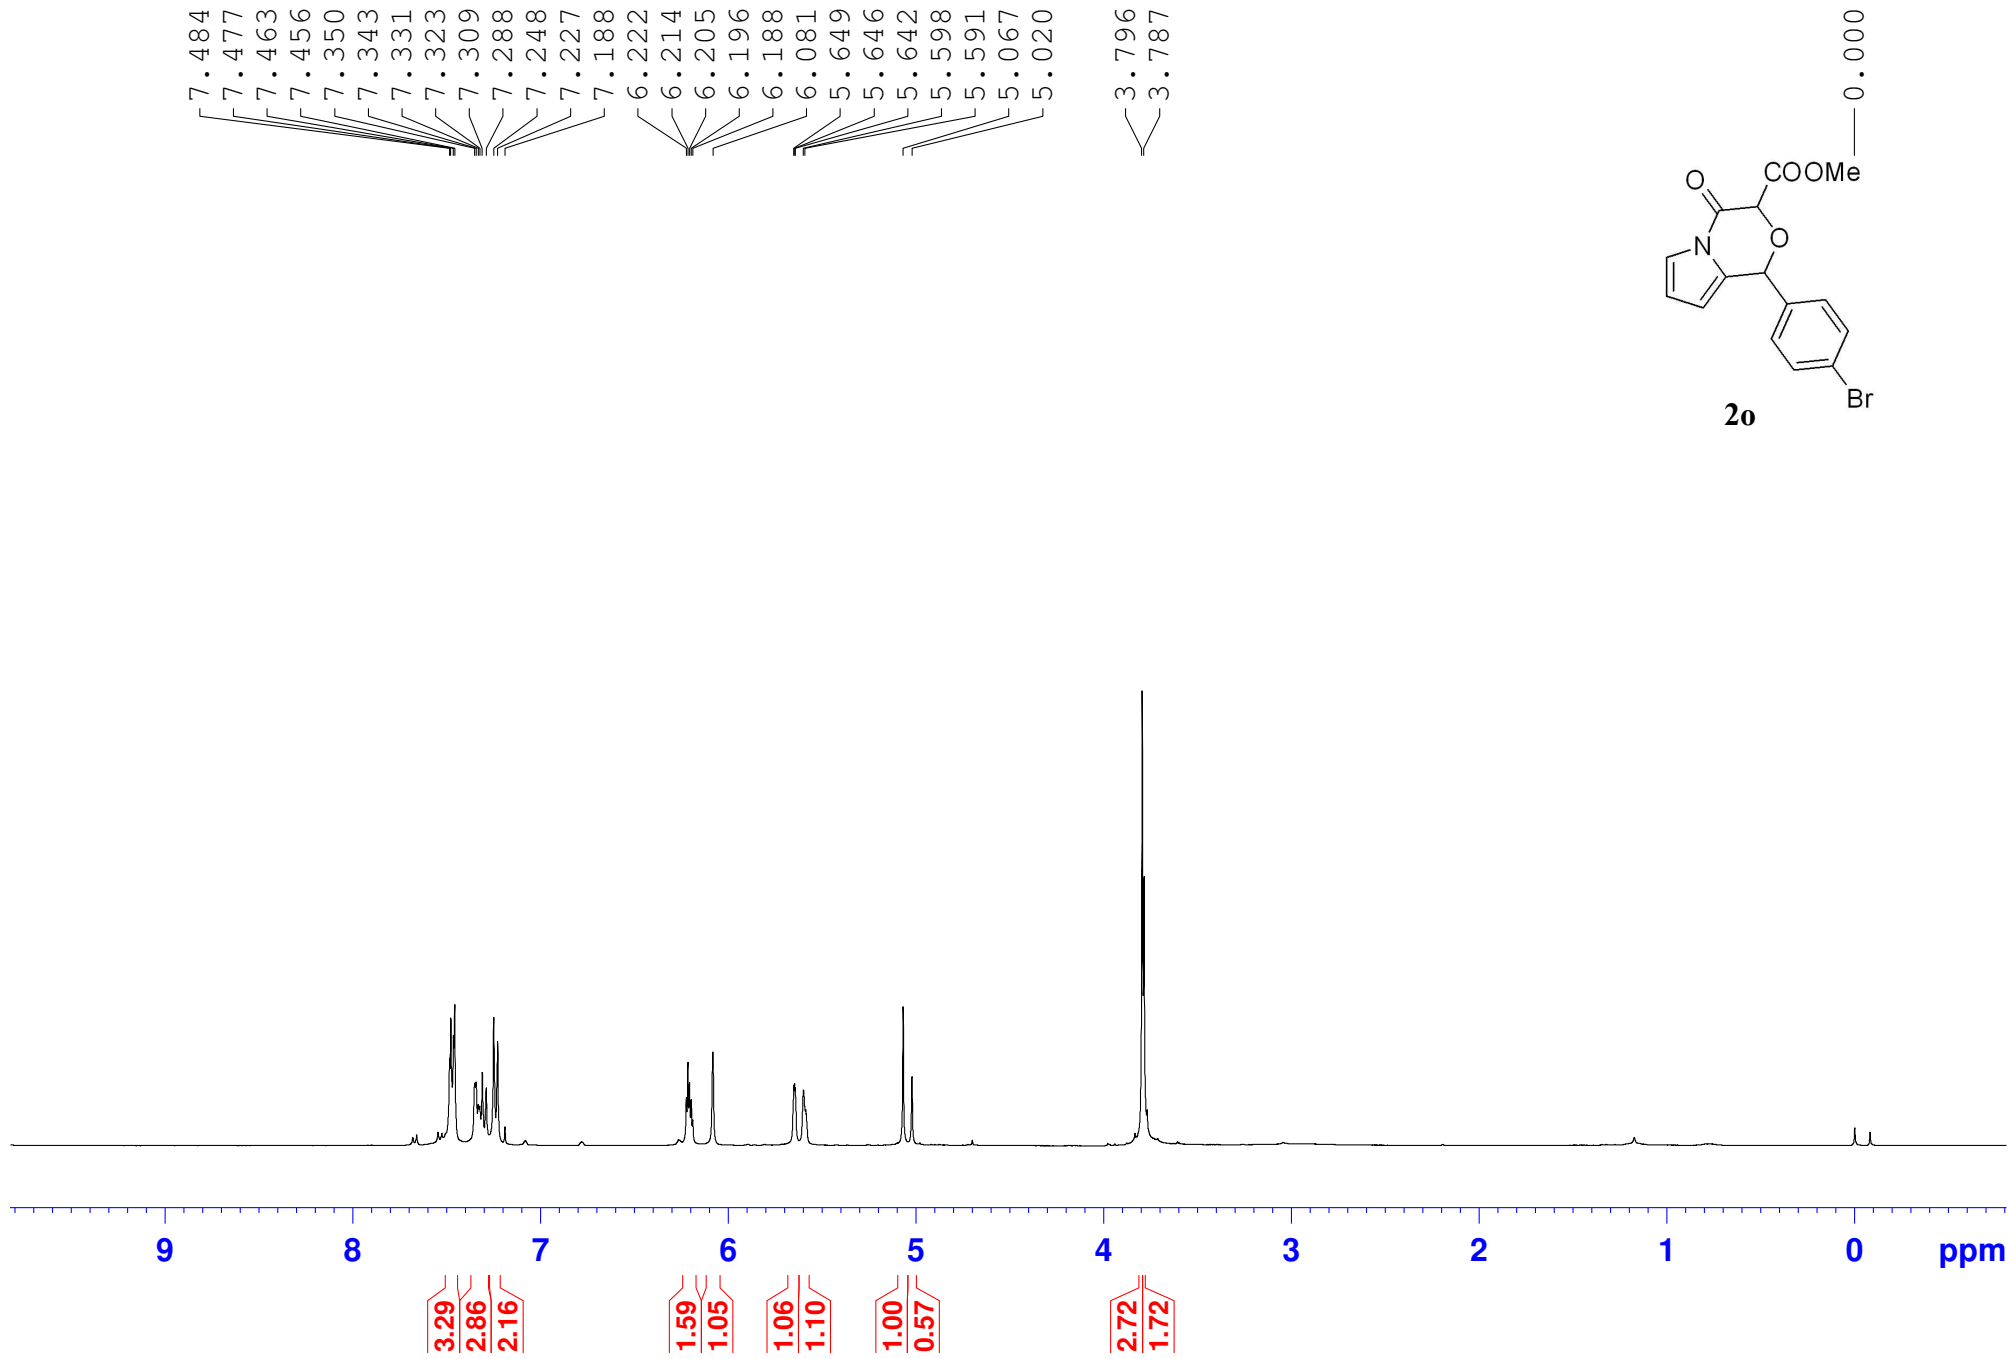

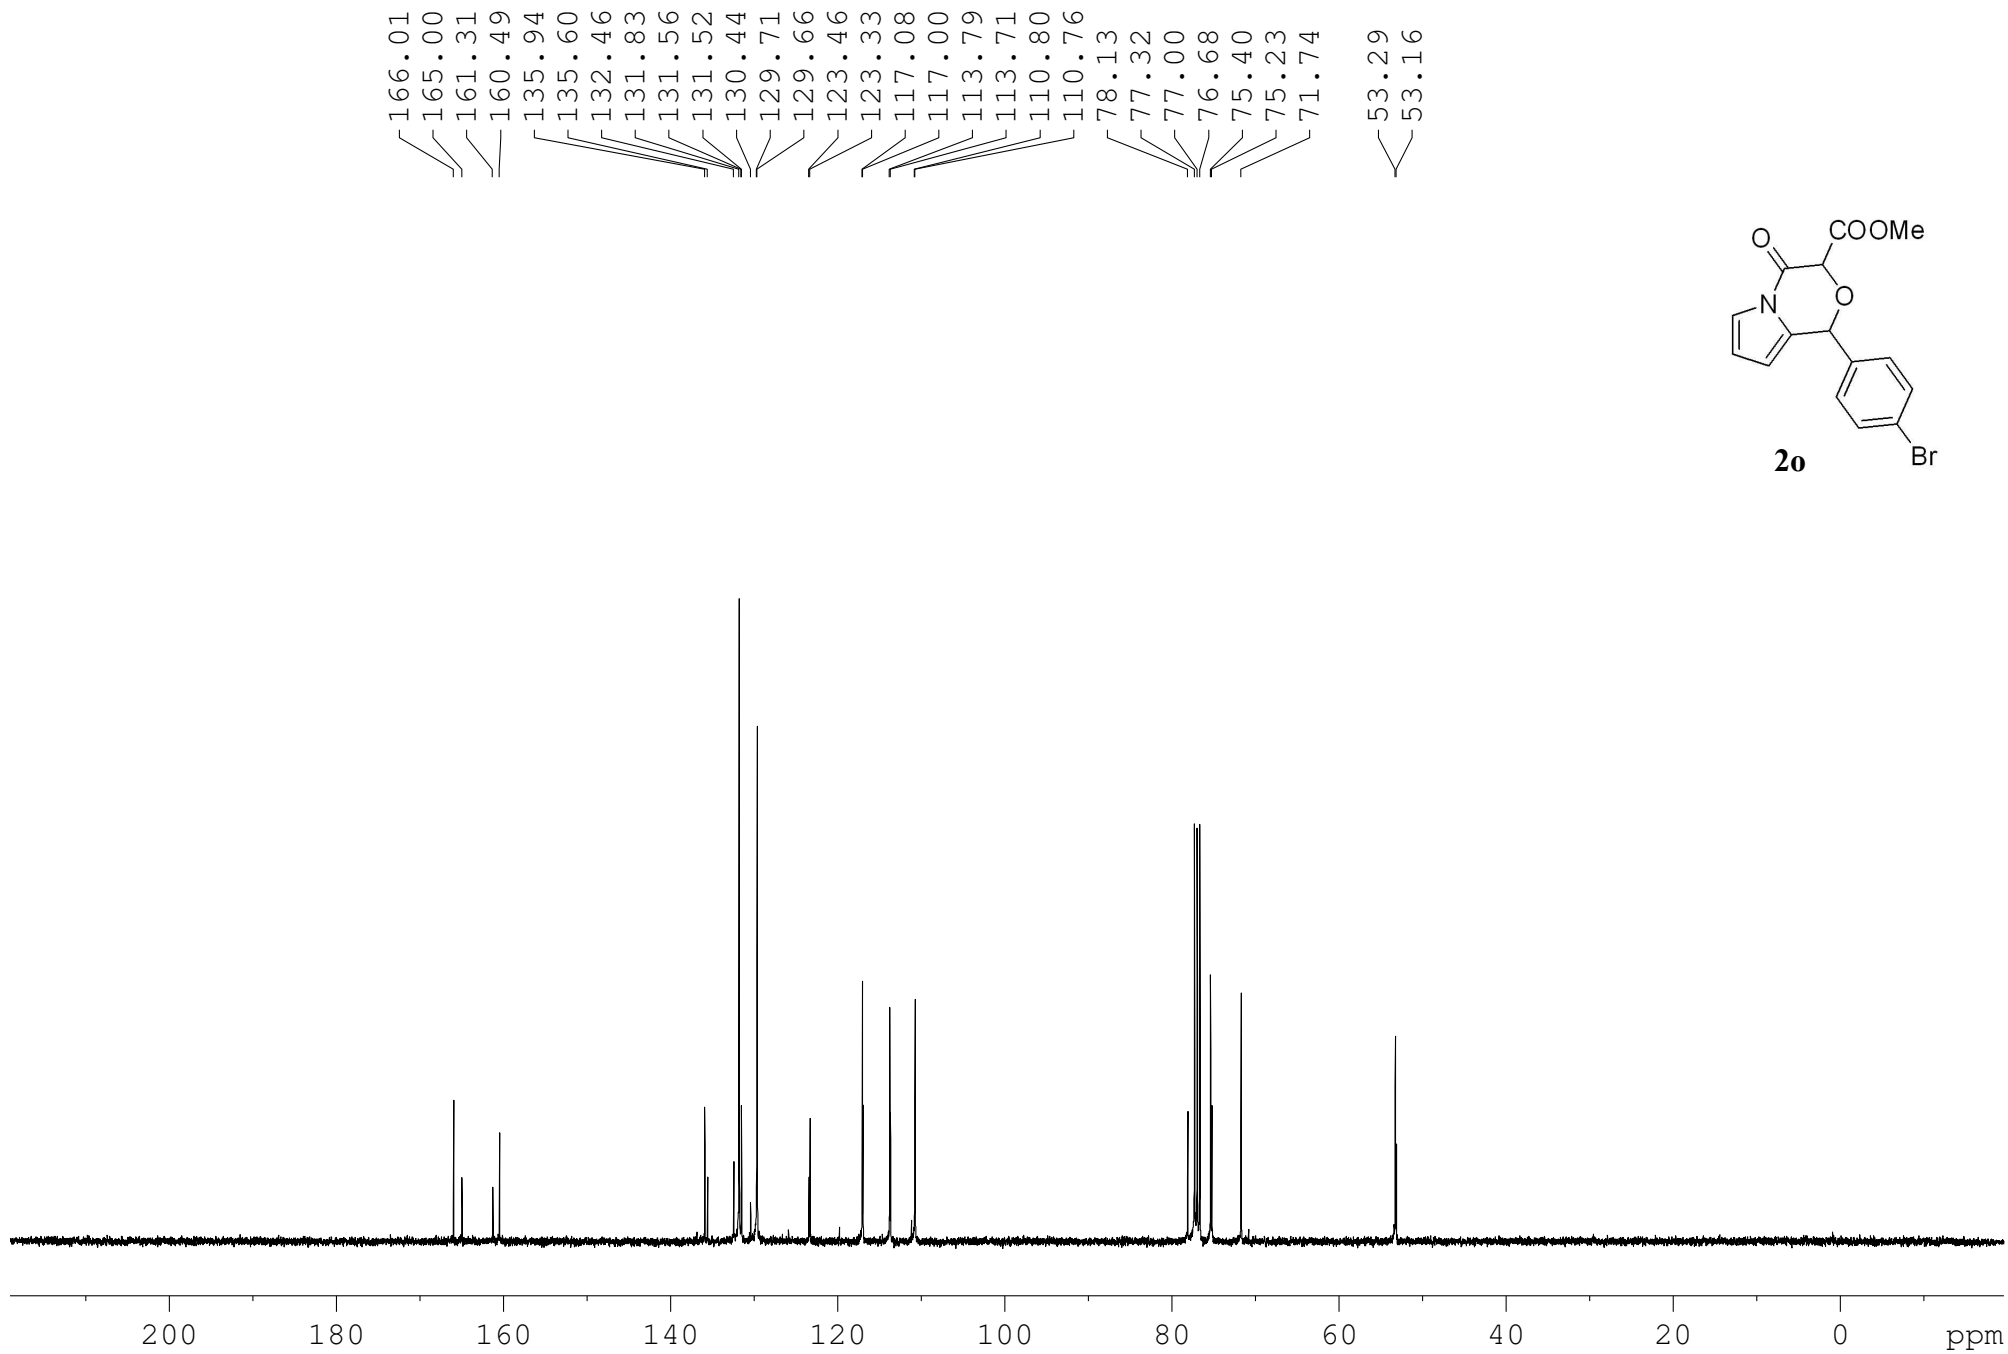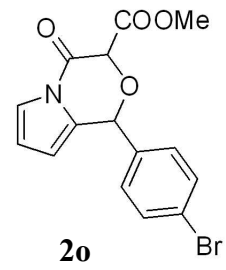

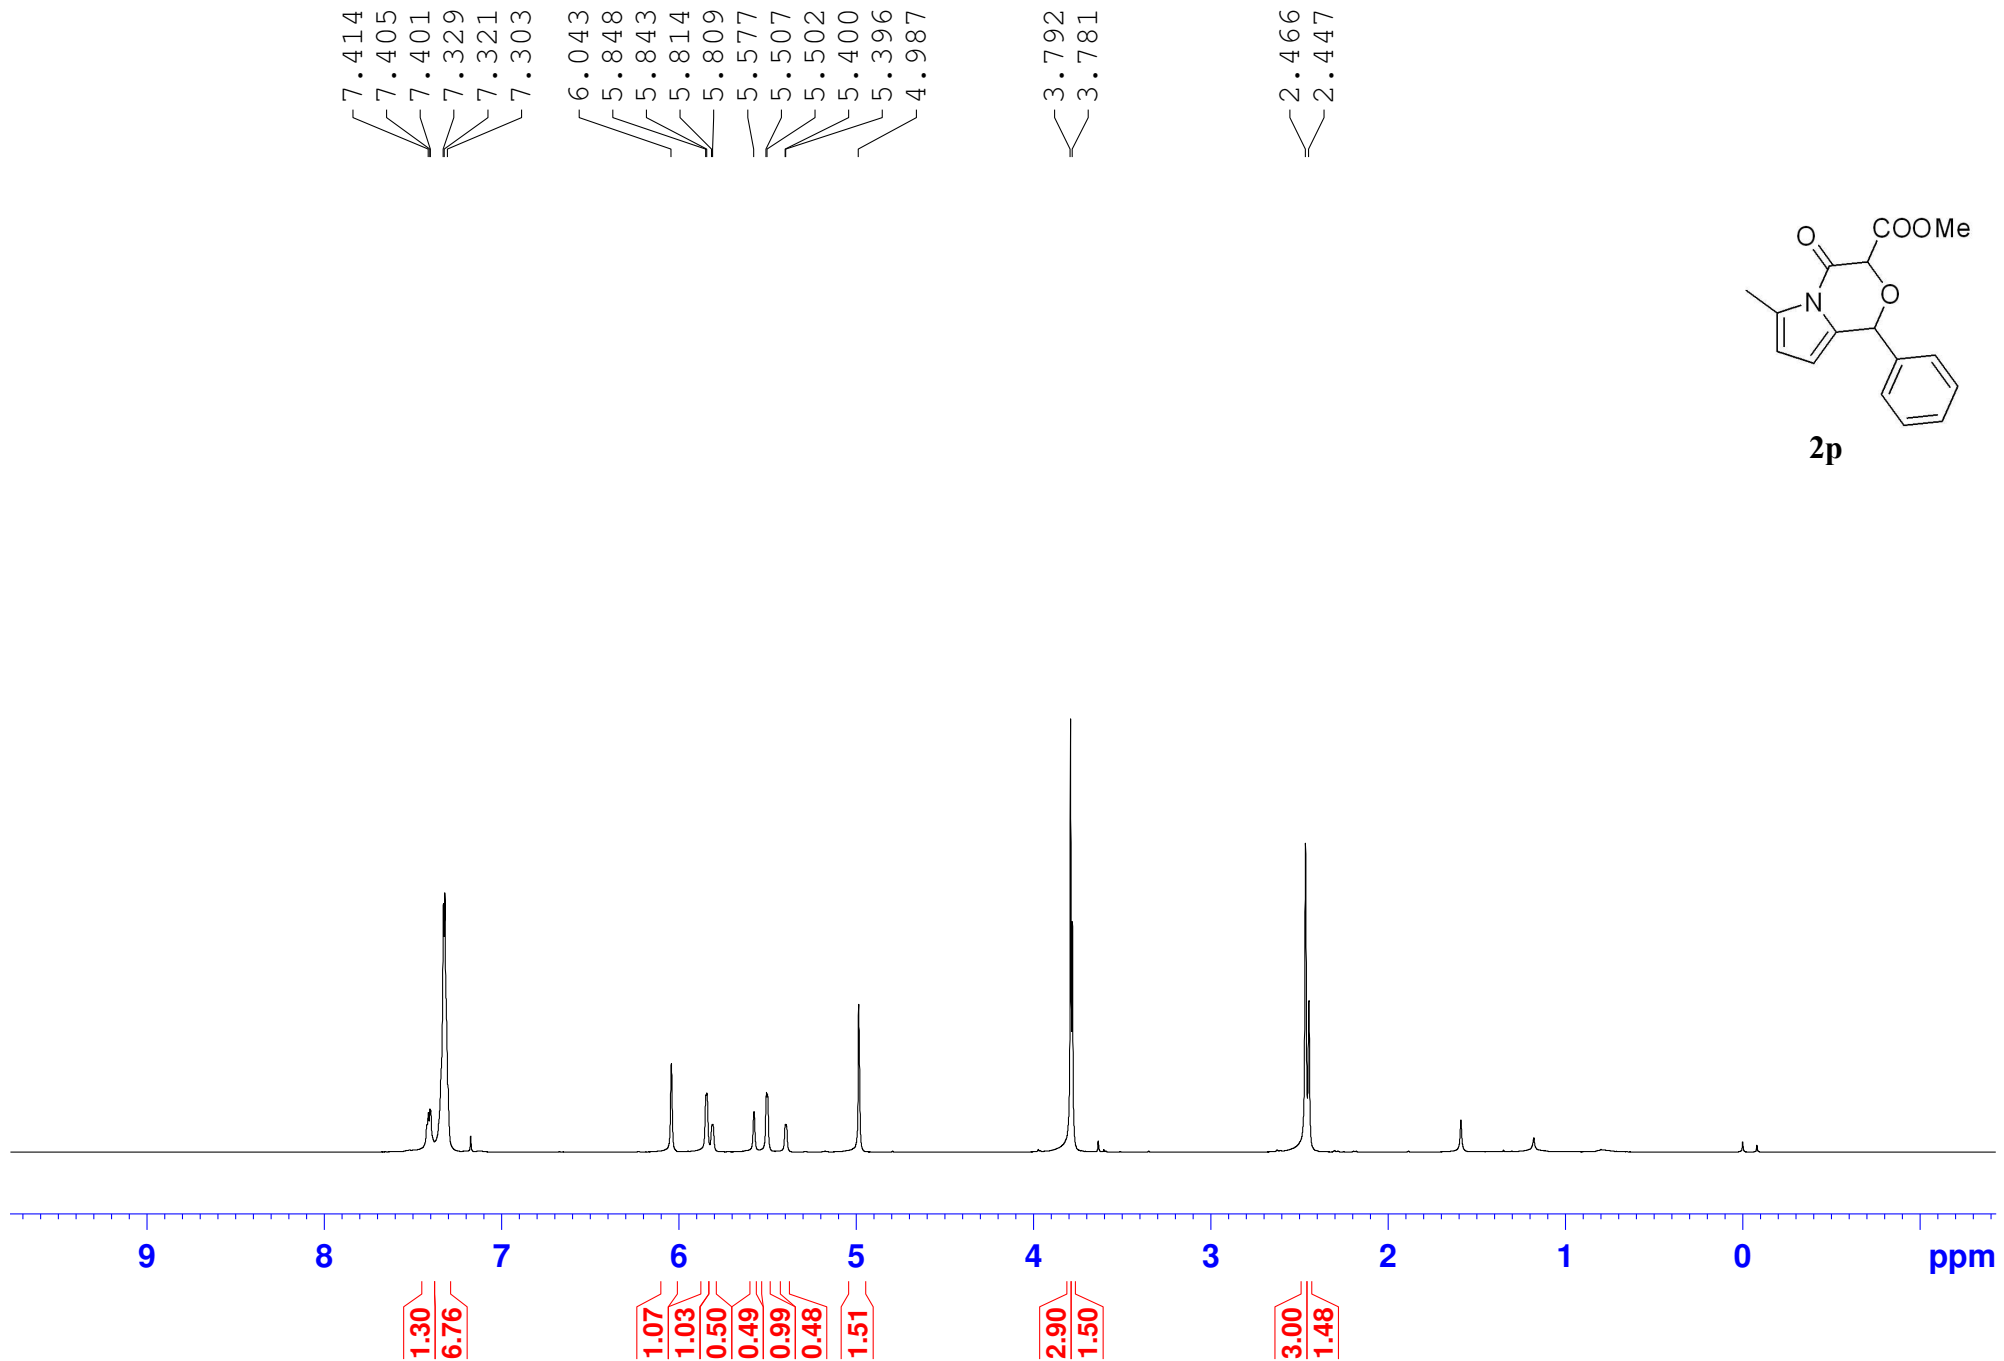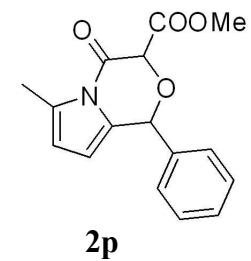

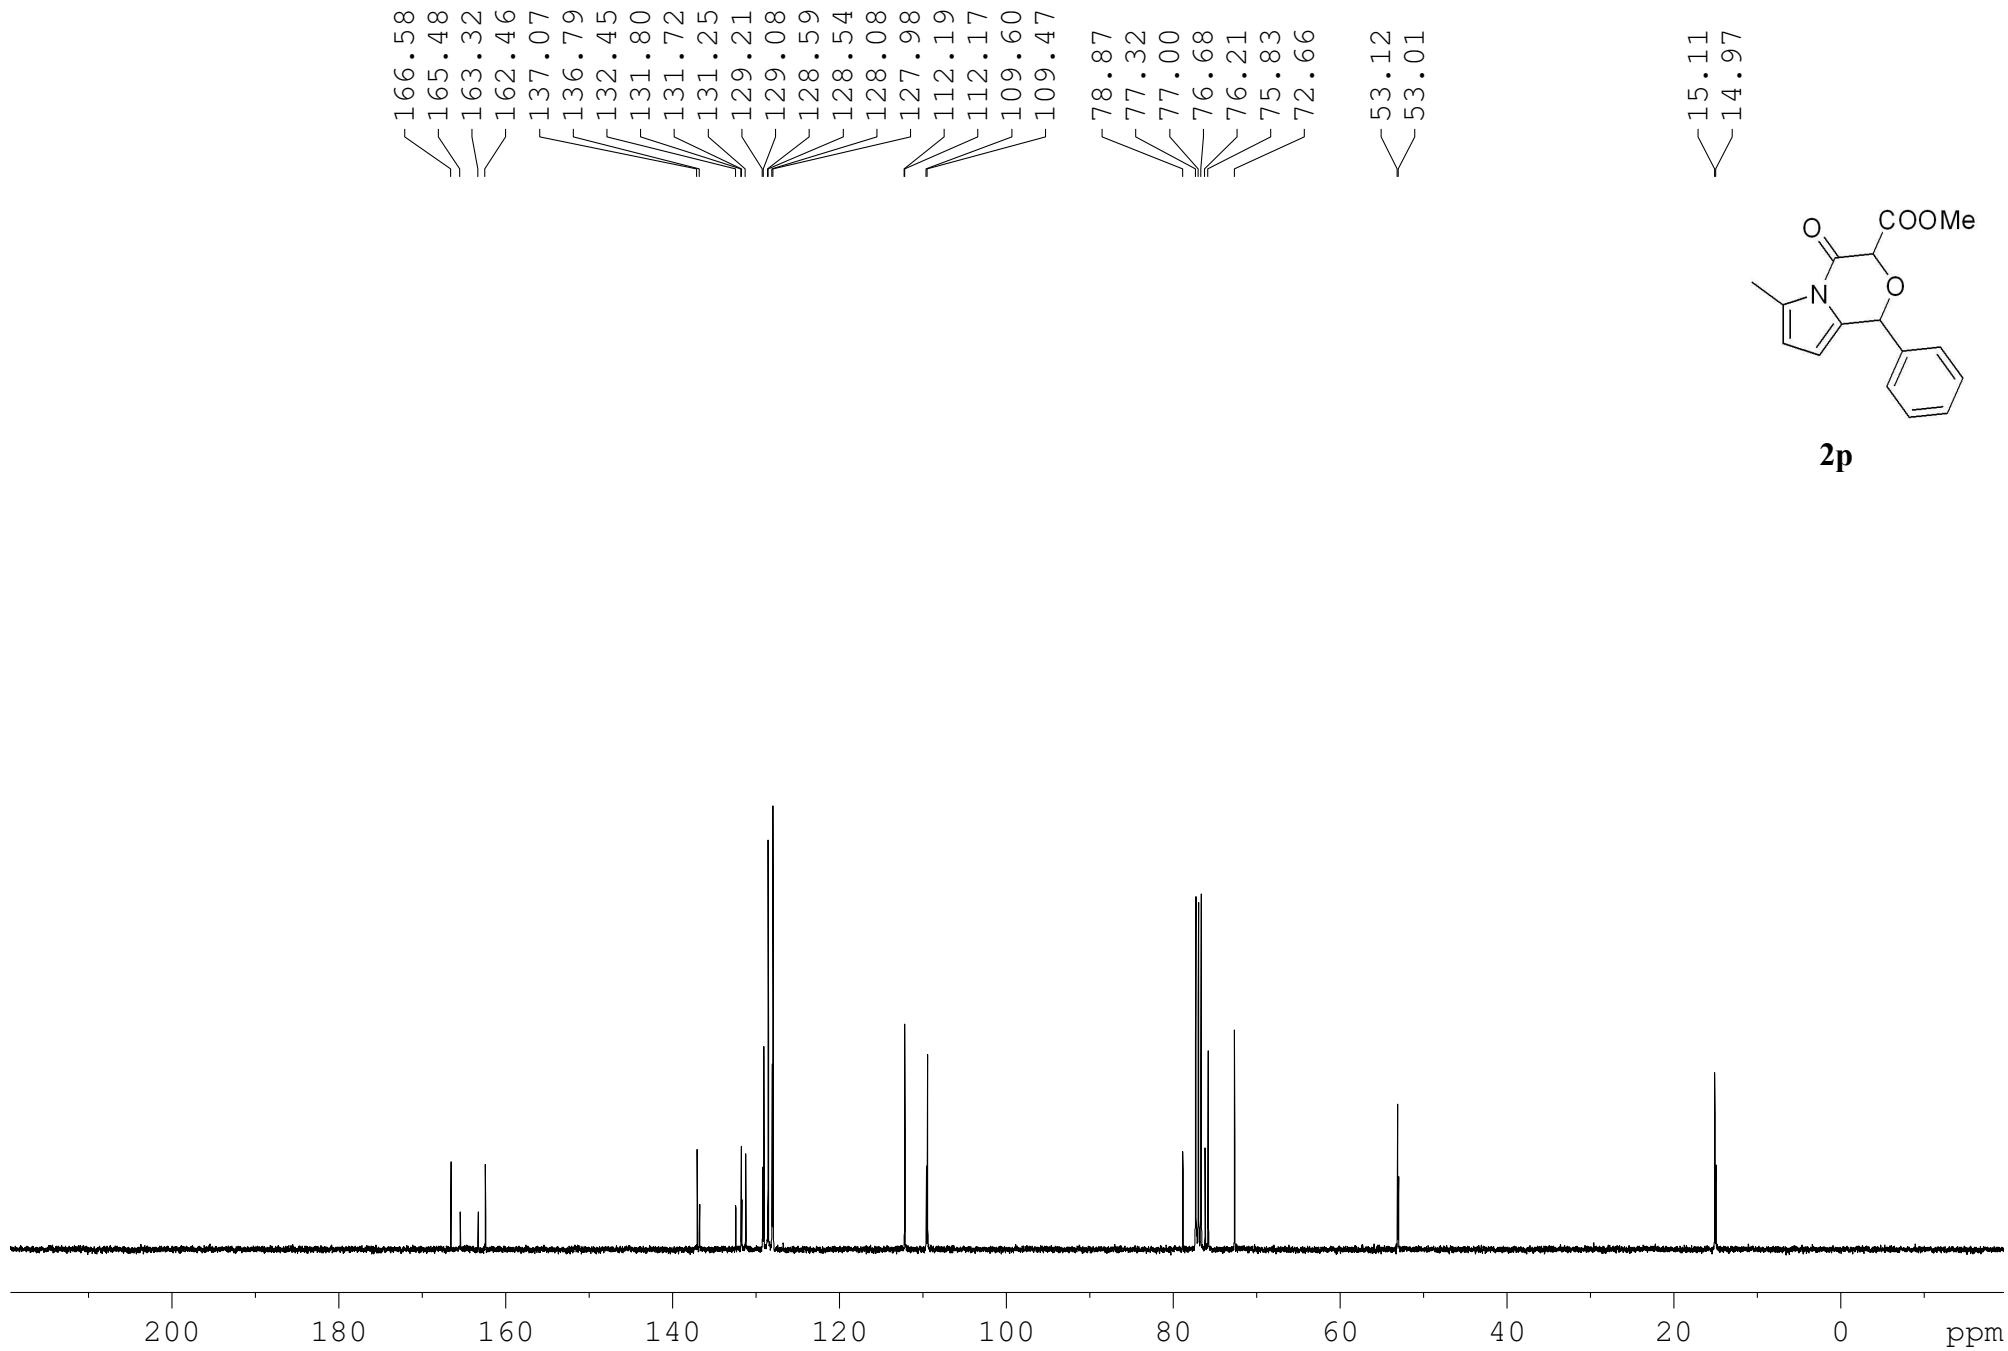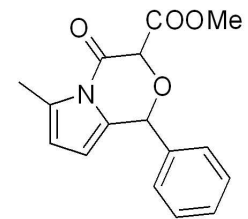

**2p**

7.336  
7.321  
7.319  
7.283  
7.269  
7.251

6.133  
5.932

4.601  
4.312

3.263

2.446

0.000

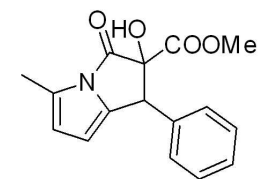

**3p**

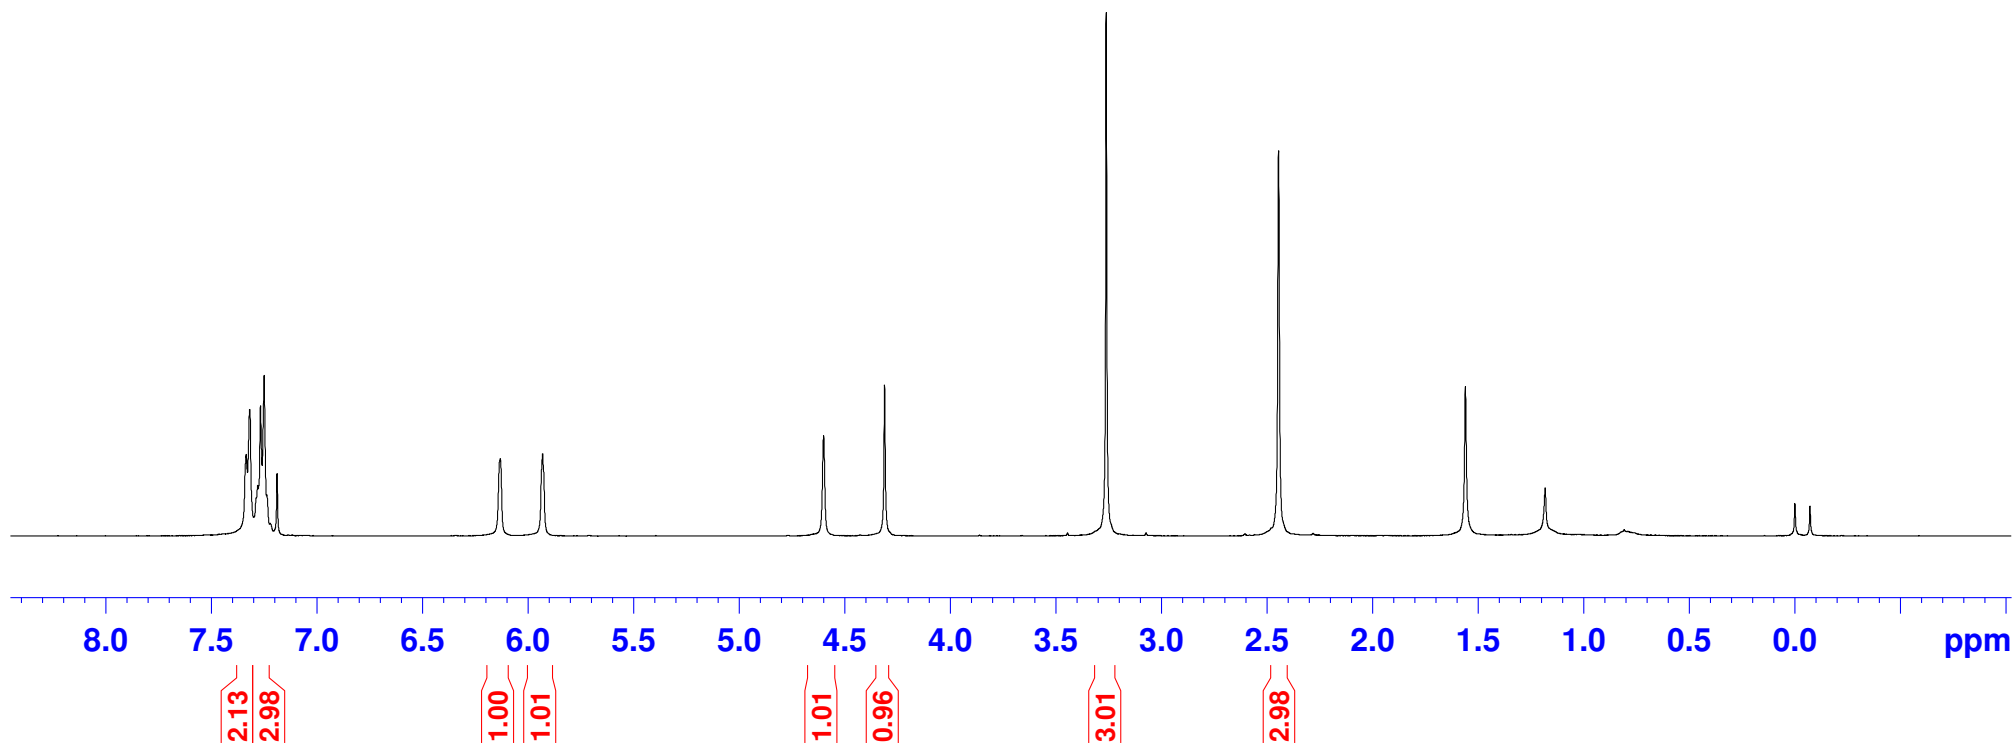

169.53  
167.78

134.85  
134.61  
128.43  
128.21  
128.14  
126.25  
117.05

106.60

87.21

77.32  
77.00  
76.68

53.07  
51.15

11.97

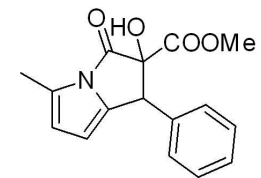

**3p**

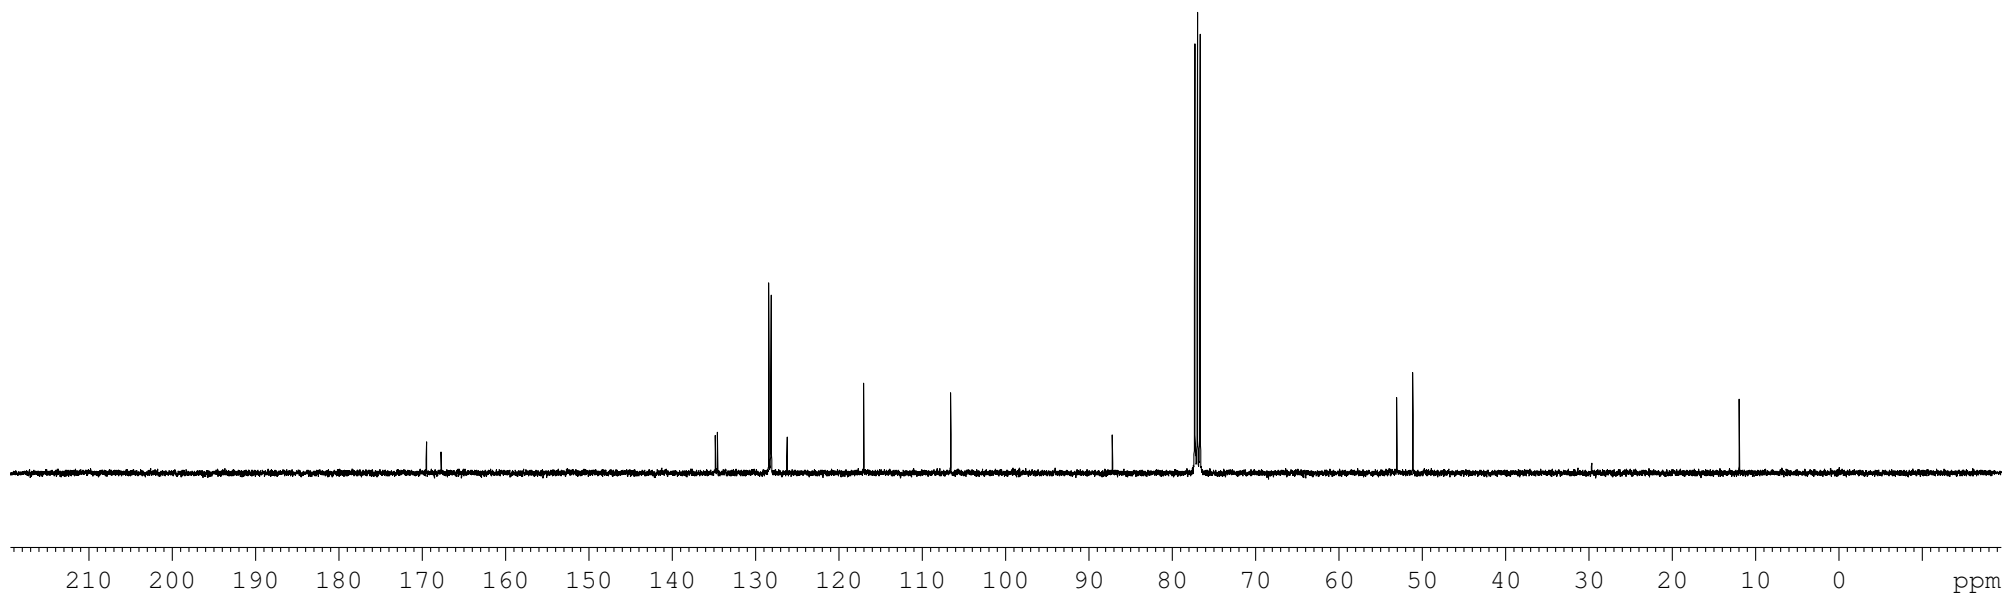



8.527  
8.508

7.529  
7.511  
7.456  
7.448  
7.428  
7.396  
7.362  
7.260

6.211  
6.068

3.865

3.325

1.925  
1.897  
1.852  
1.525

0.031

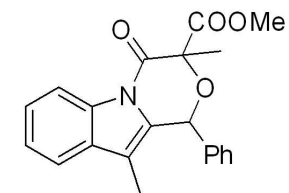

5a

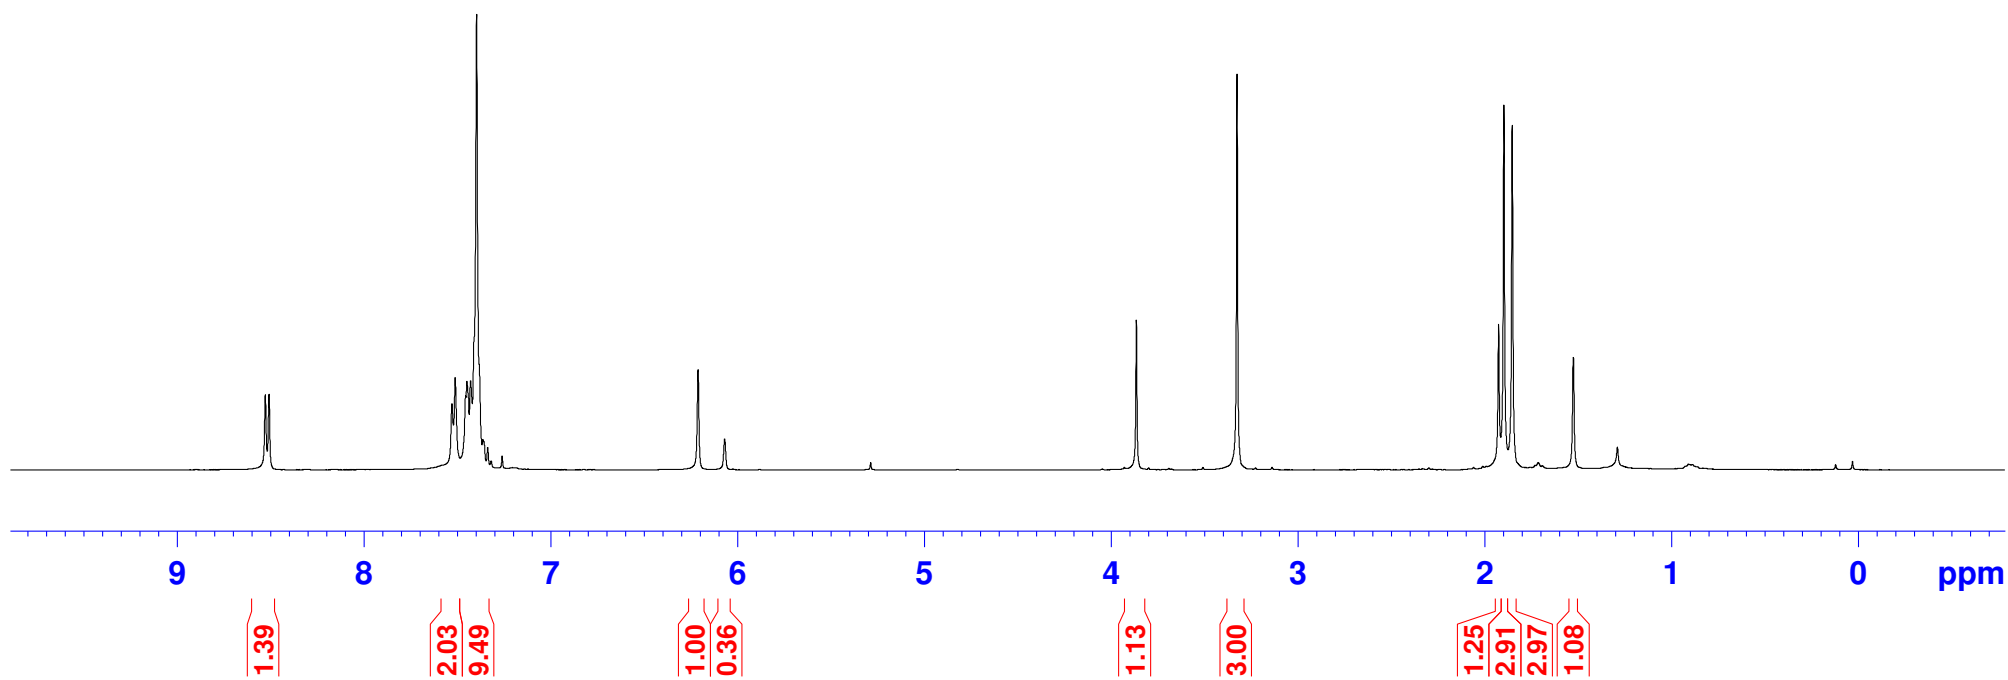

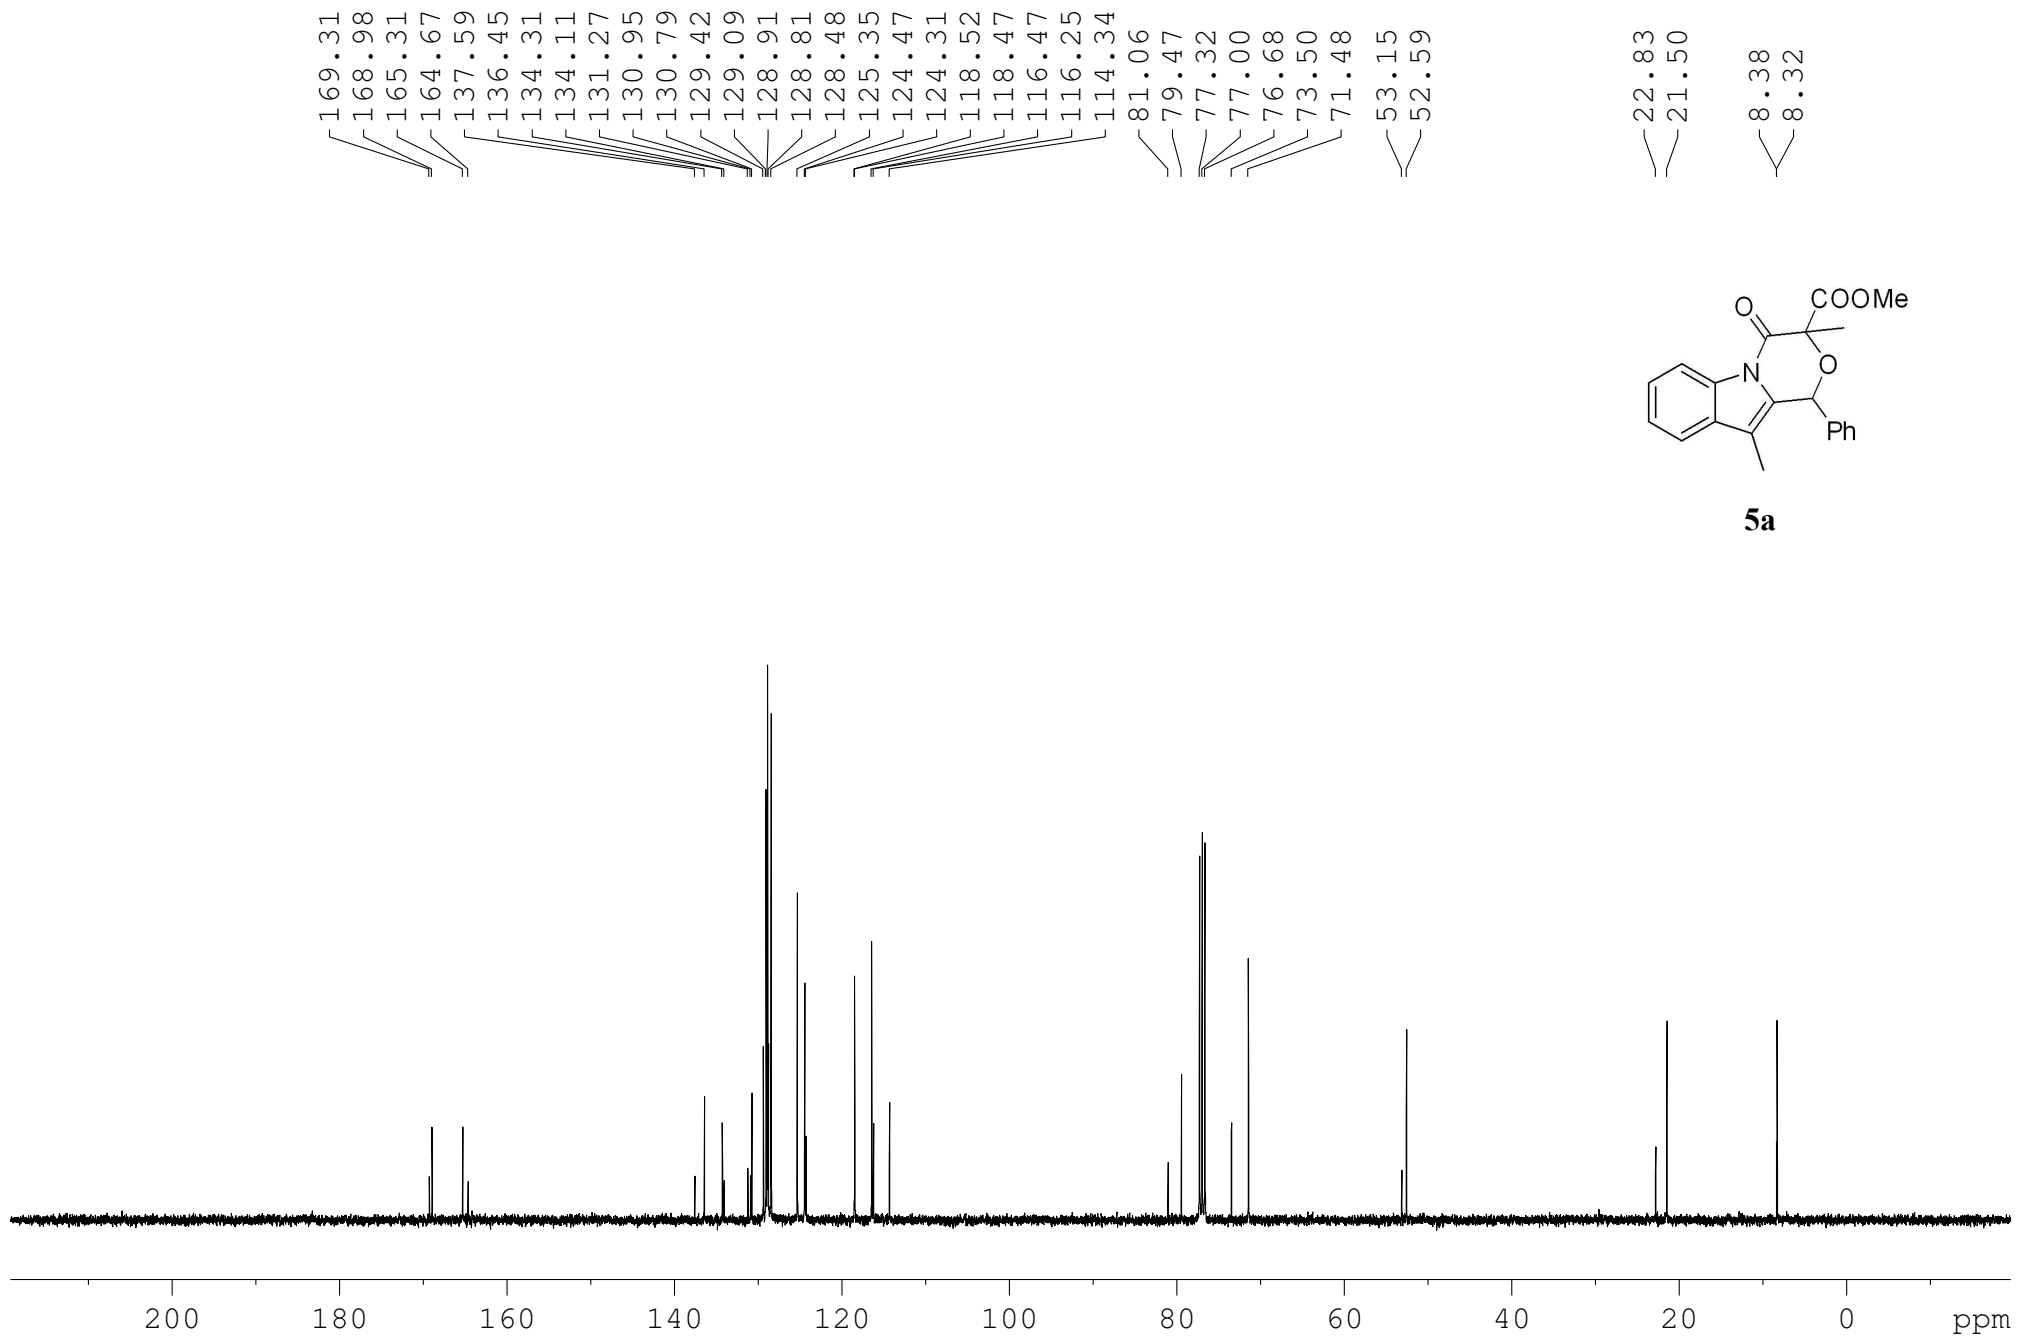

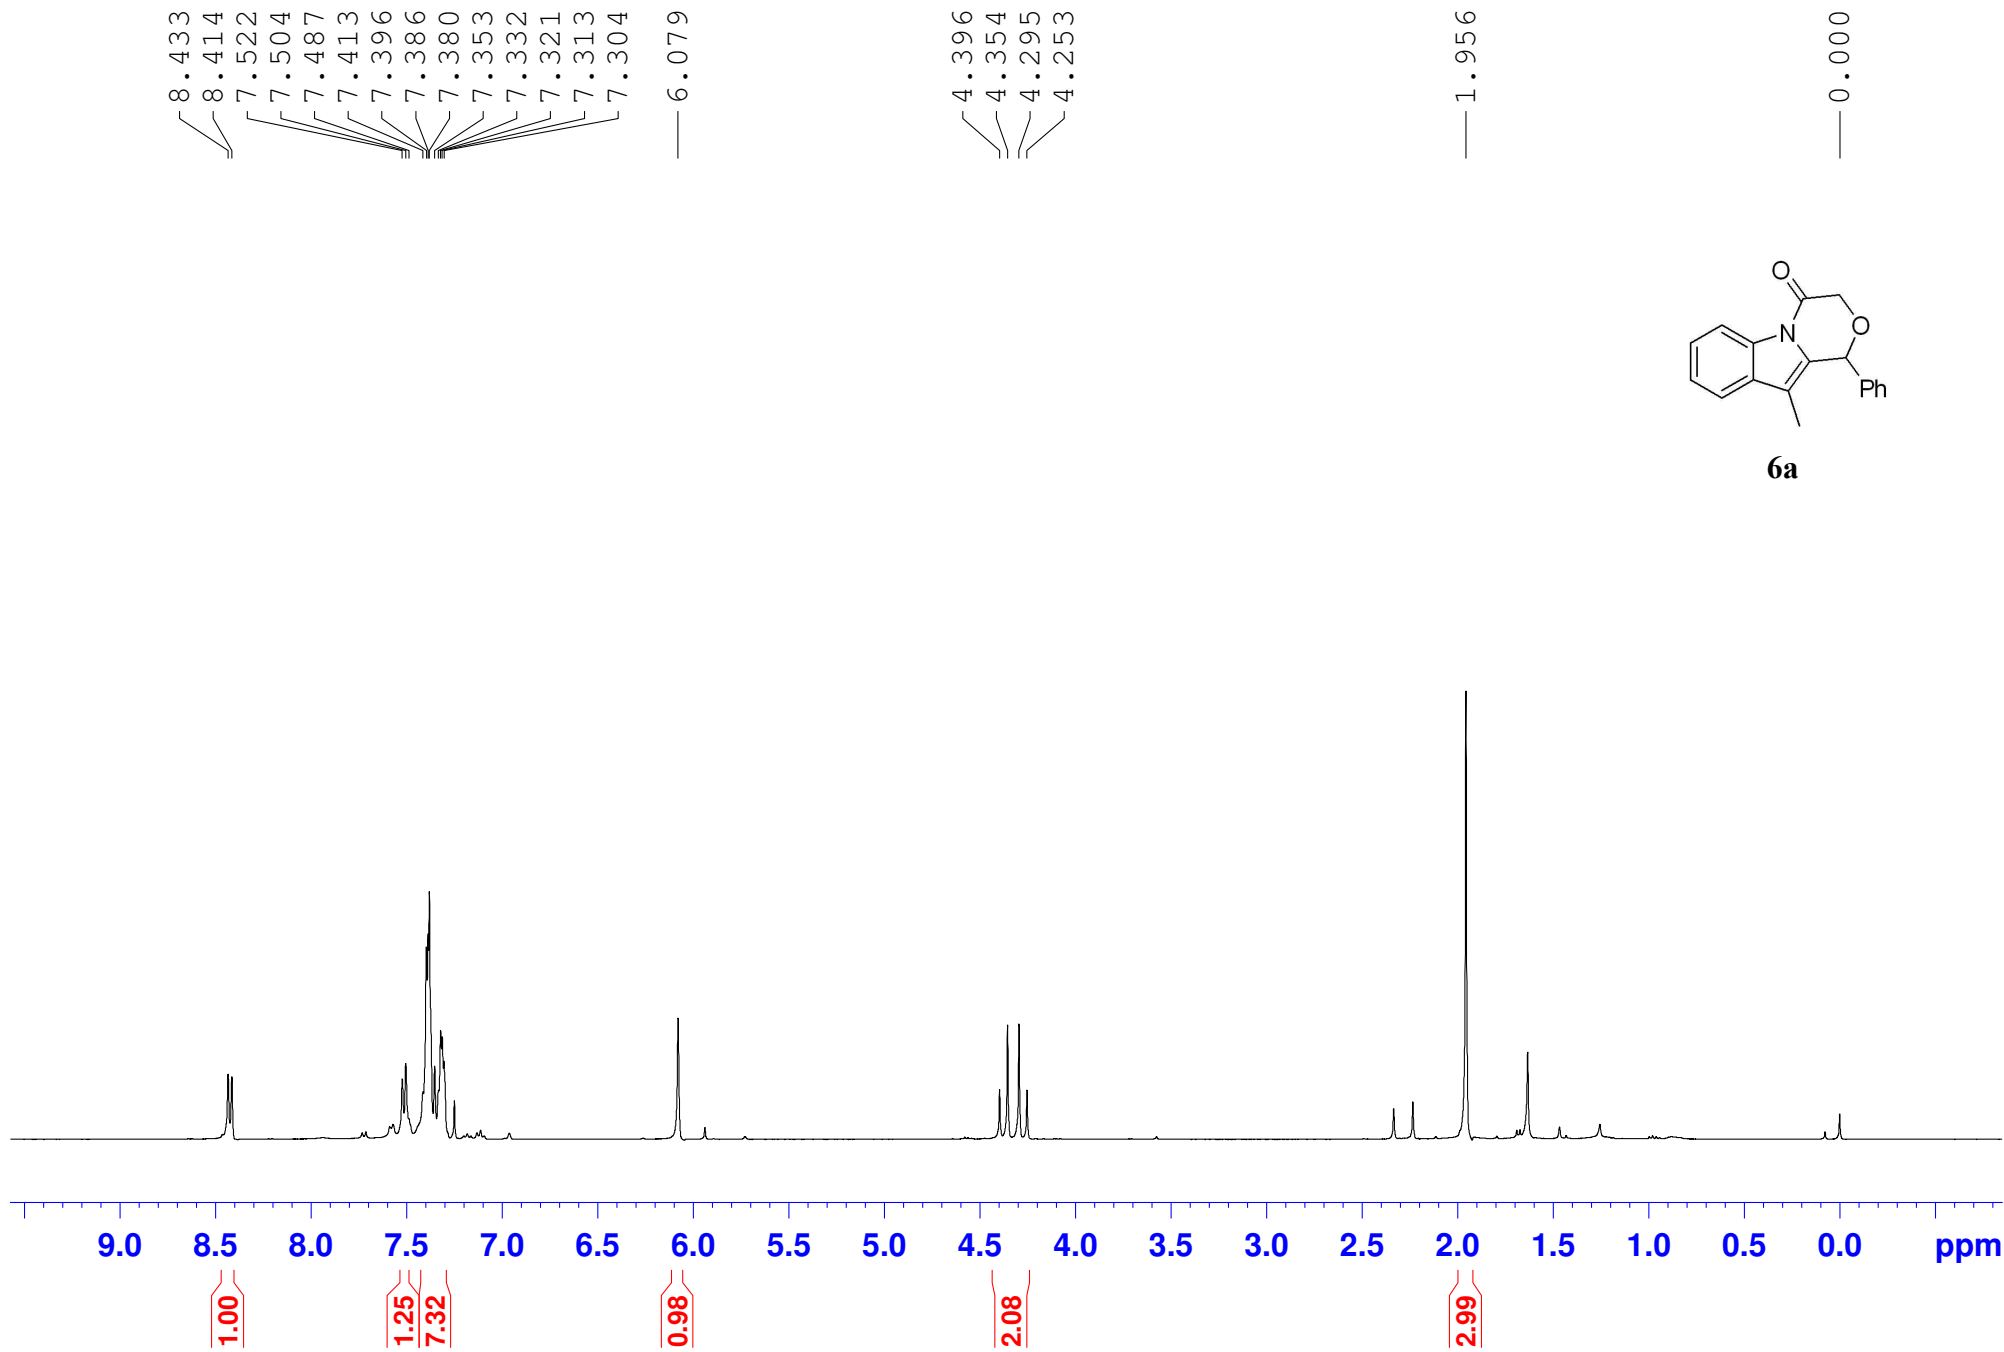

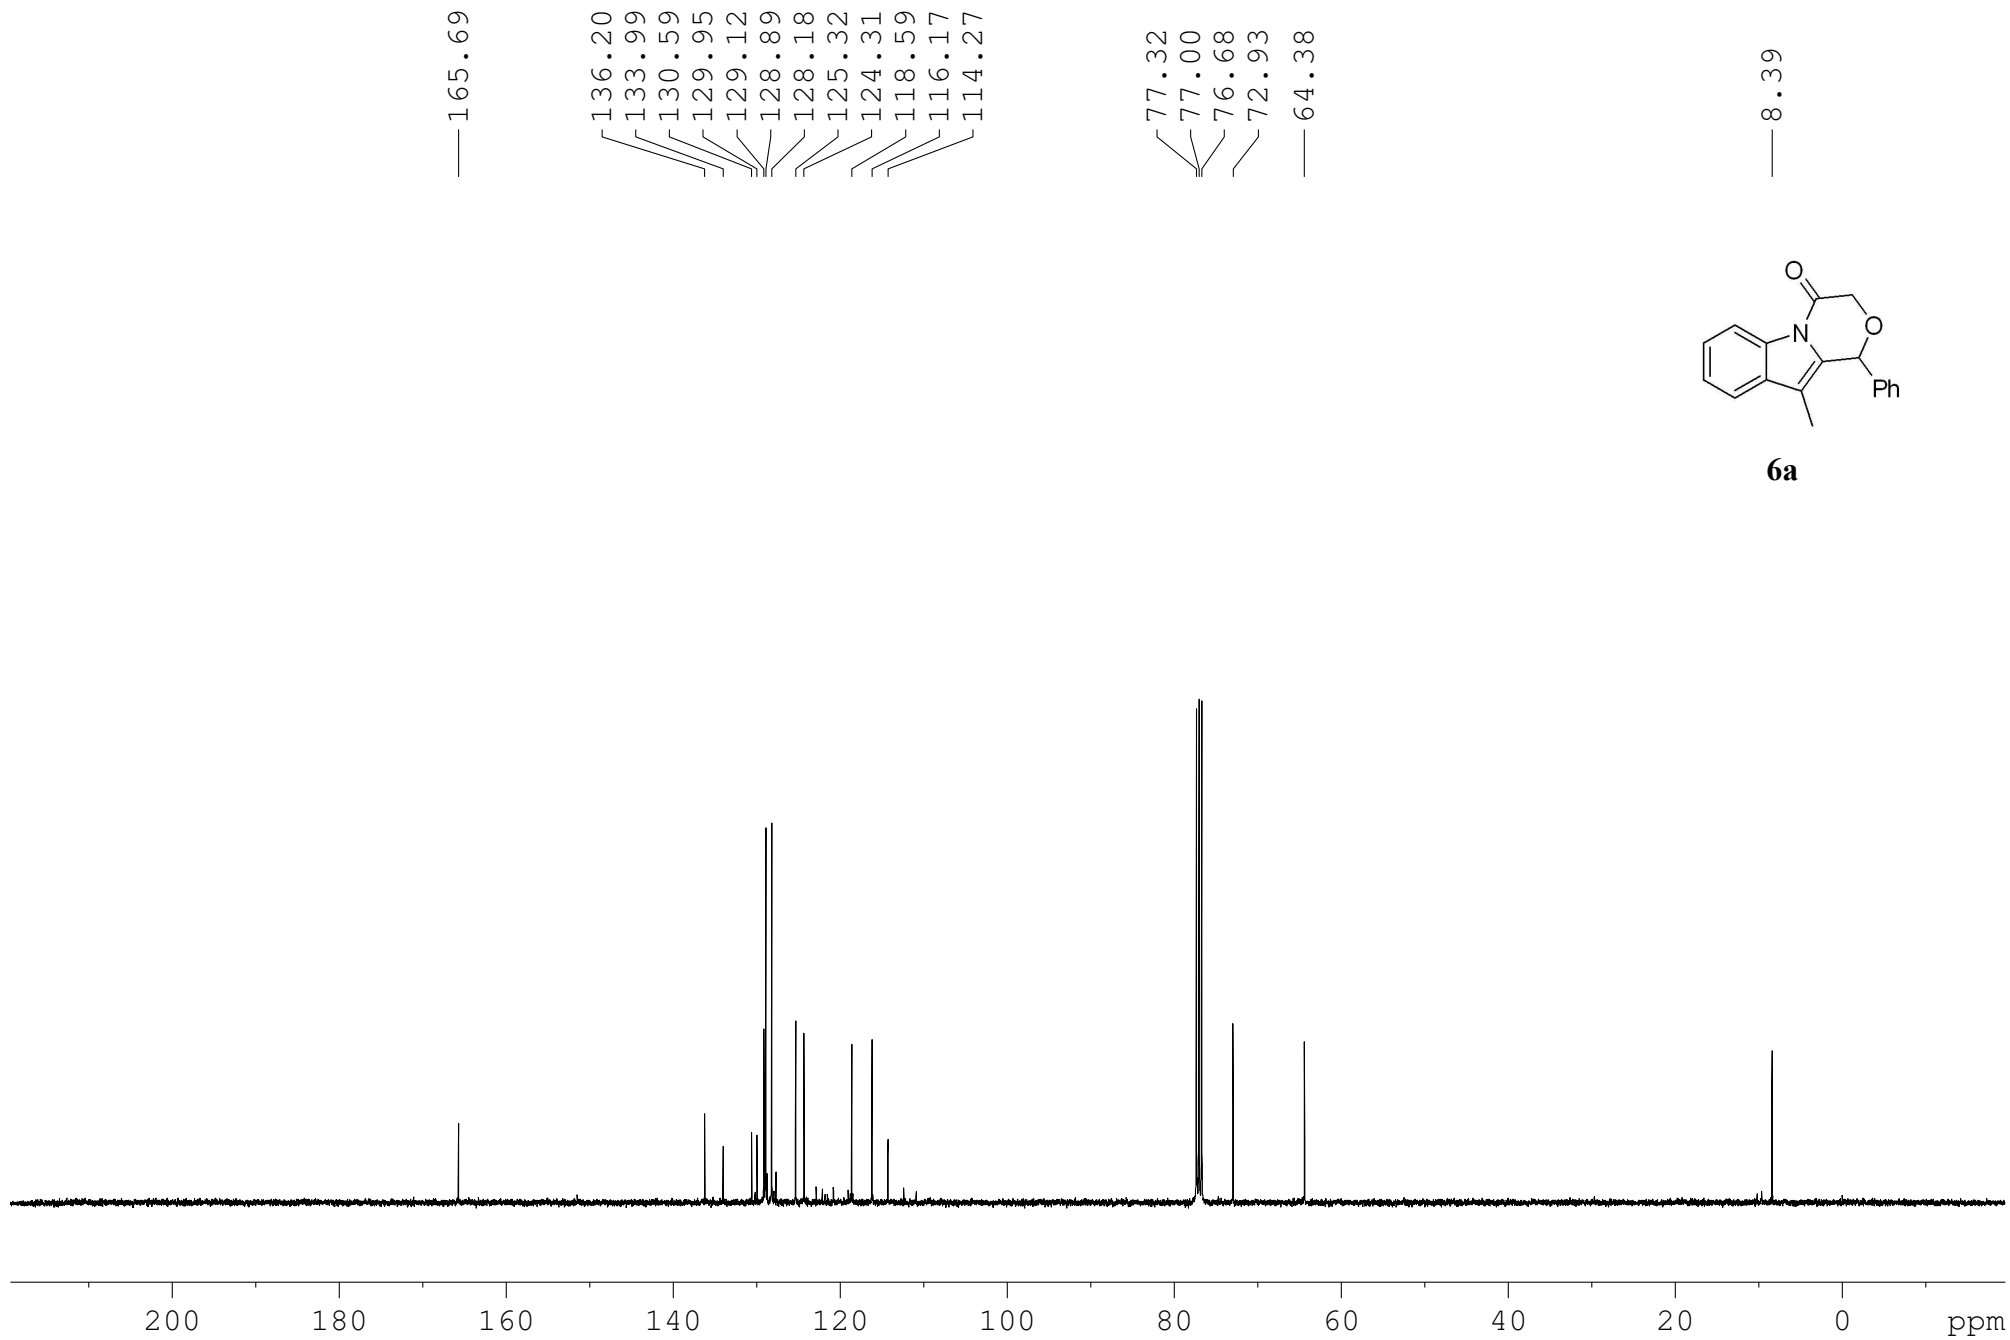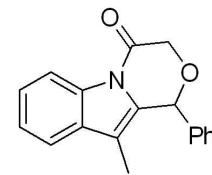

**6a**

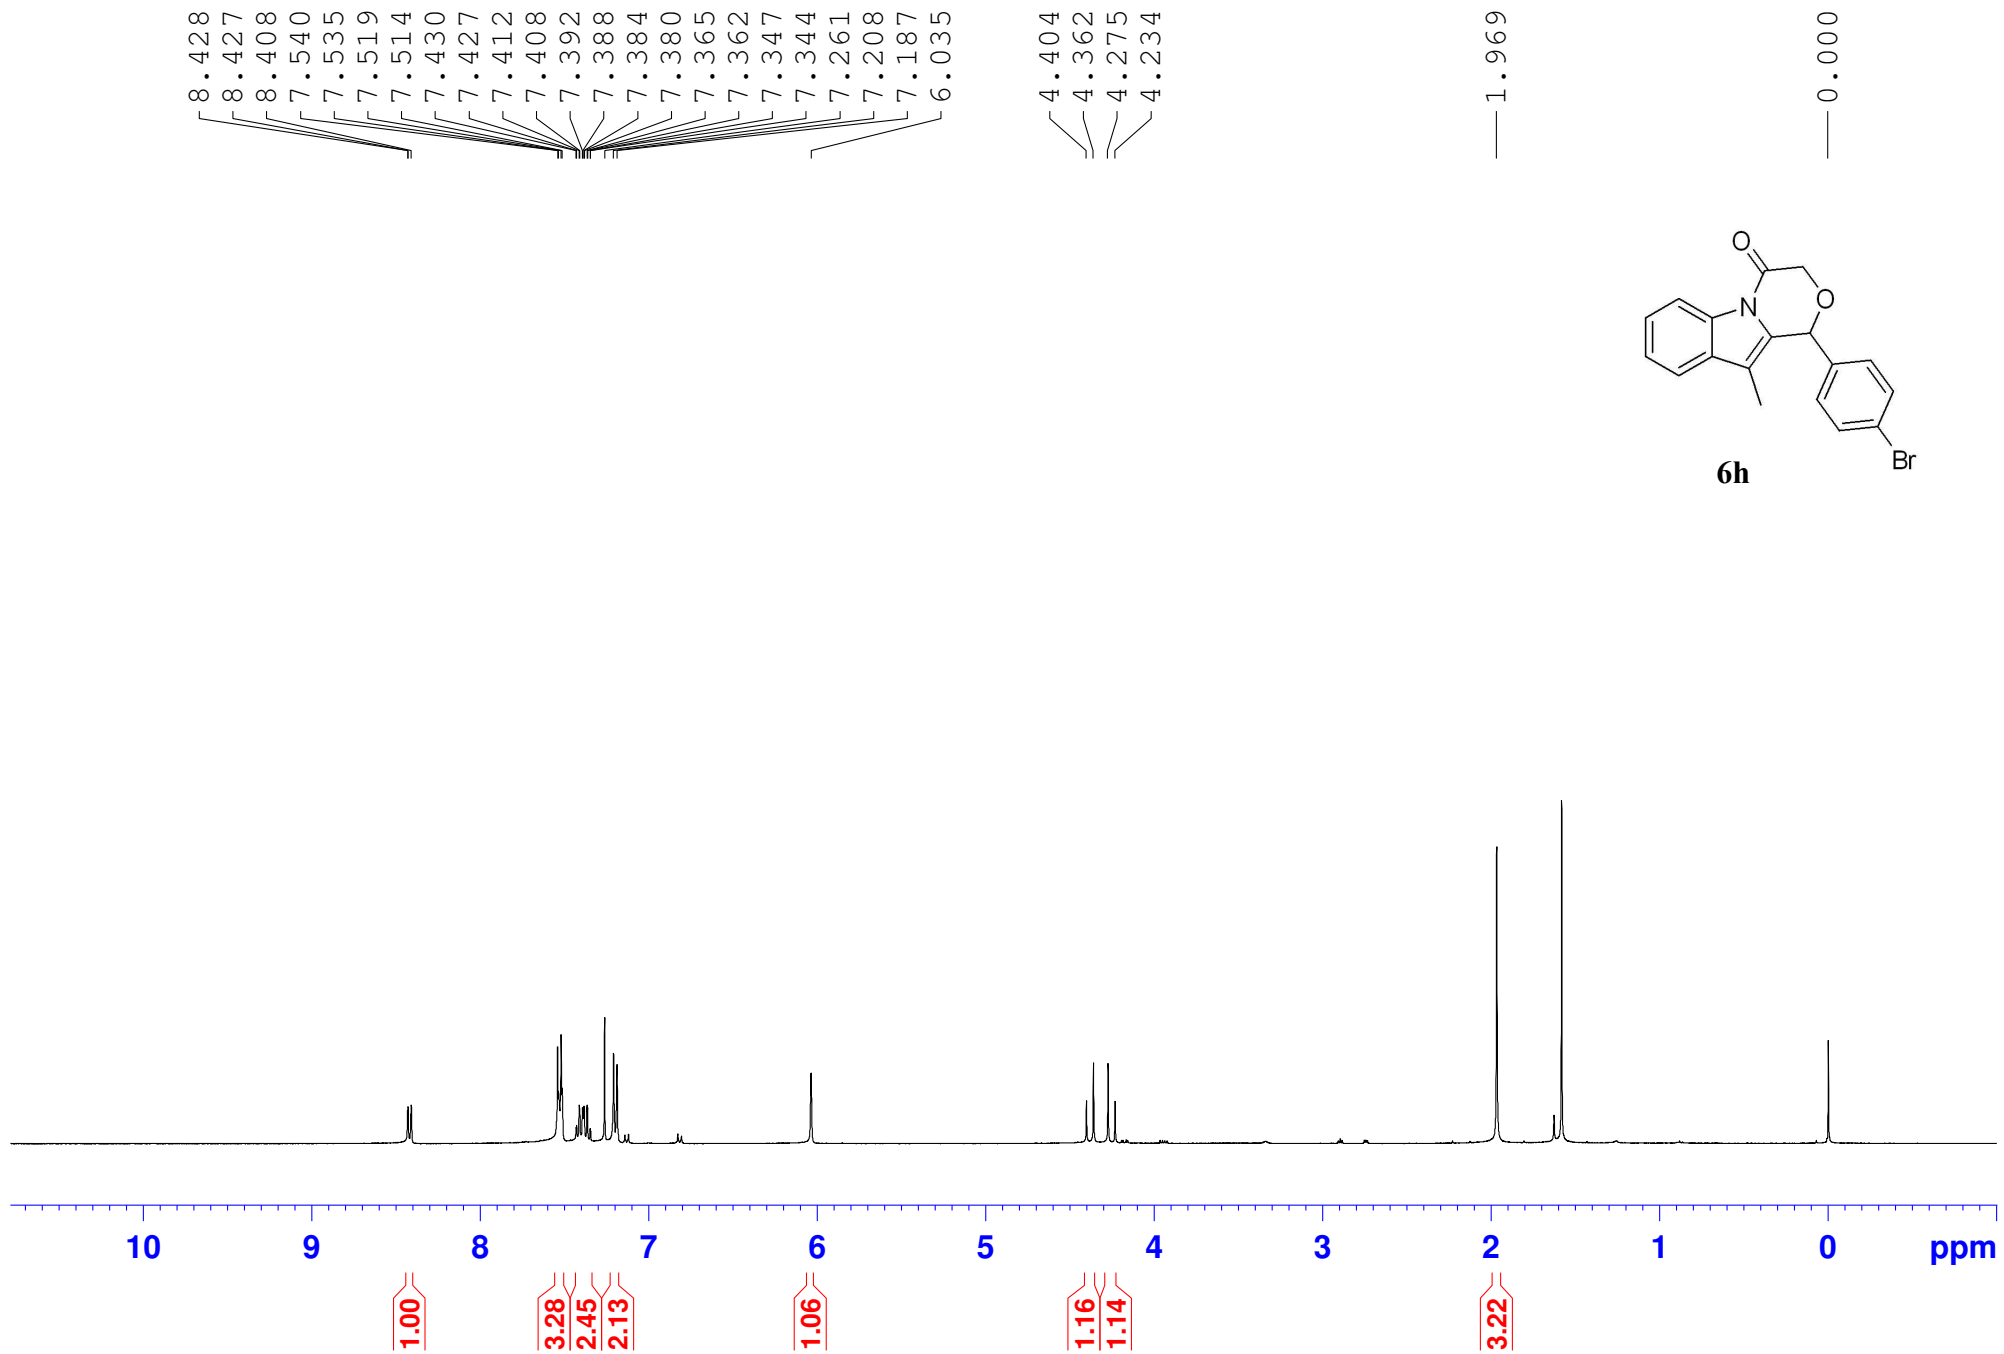

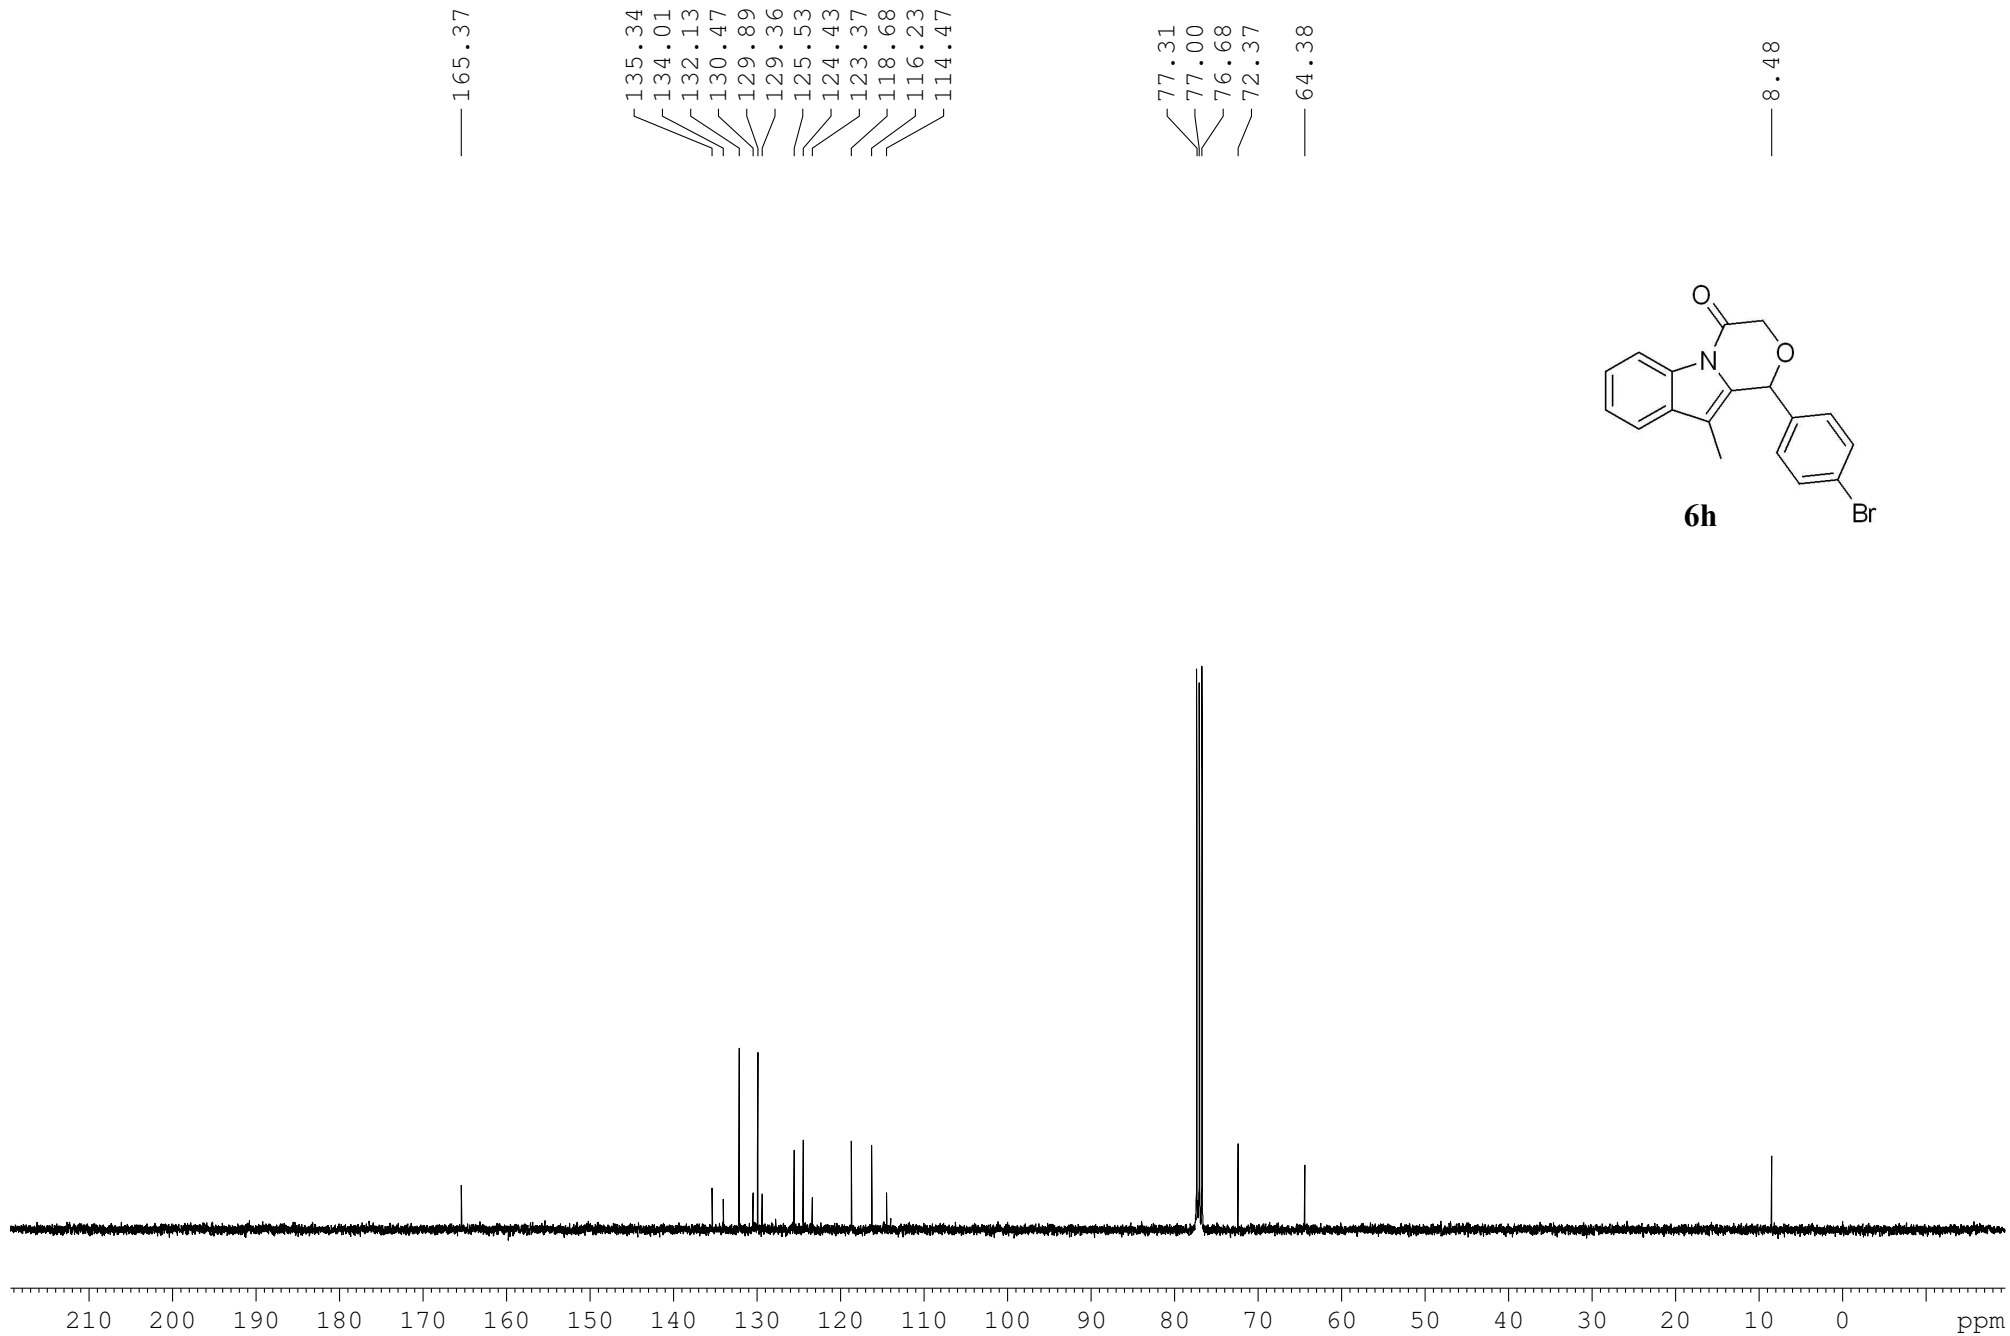

Supplement: c4ob01057d1.pdf [file c4ob01057d1.pdf]
